# Supplementary material for: Host genetic control of the oral microbiome and its links to human metabolism and immunity
Source: Research Square preprint supplement (doi:10.21203/rs.3.rs-8406553/v1), 2026-01-16
Supplement: Supplementary file 1 [file 13630e654a1ee1a2b38fbf41.xlsx]

## Sheet: Table legend
Supplementary Table	Descriptions
Supplementary Table 1	Sample and data production summary
Supplementary Table 2	Microbiome-PCoA associations that were assessed using envfit (R package vegan) with 9,999 permutations
Supplementary Table 3	Correlations between host confounders and microbial diversities (alpha diversity and beta diversity PCoAs)
Supplementary Table 4	the explained variance of microbial beta diversity by host confounders (PERMANOVA test, 1000 permutations)
Supplementary Table 5	The average relative abundances and occurrence rates of 534 tongue dorsum microbial taxa used for M-GWAS analysis across the three cohorts
Supplementary Table 6	The average relative abundances and occurrence rates of 311 tongue dorsum microbial pathways used for M-GWAS analysis across the three cohorts
Supplementary Table 7	The genome-wide significant and independent loci associated with the microbial features
Supplementary Table 8	All the genome-wide significant variants associated with the microbial features identified in the discovery cohort and their replication information in the two validation cohorts
Supplementary Table 9	Genetic associations with microbial alpha (Shannon index, Simpson index) and beta diversity features ( PCoA1-10)
Supplementary Table 10	All the study-wide significant variants associated with the microbial gene families identified in the discovery cohort and their replication information in the two validation cohorts
Supplementary Table 11	The eQTL signals of significant genetic variants by searching in the Genotype-Tissue Expression Project (GTEx) v8 dataset
Supplementary Table 12	eQTL and caQTL signals of significant genetic variants in the CIMA catalog
Supplementary Table 13	The phenome-wide GWAS results of significant genetic variants by searching in the BBJ, GWAS catalog datasets, as well as the blood chemistry, dental health and disease GWAS results in this study
Supplementary Table 14	The 239 observationally significant correlations between microbial features and host traits (FDR adjusted P < 0.05)
Supplementary Table 15	One-sample BMR identifying six causal relationships between microbiome features and host traits after multiple test correction for all 239 observationally significant correlations (p <1.09× 10-4)
Supplementary Table 16	Two-sample BMR identifying five causal associations between microbiome features and host traits after multiple test correction for all 239 observationally significant correlations (p <1.09 × 10-4)
Supplementary Table 17	Comparisions of the top MGWAS associations from Kamitaki et al. and our studies
Supplementary Table 18	M-GWAS associations identified by the Kamitaki et al. (2025, preprint) and their replication in this CHARLS cohort (this study)
Supplementary Table 19	Comparison of effect allele and frequencies for the top SNPs identified by Kamitaki et al. and the current CHARLS cohort (hg38)
Supplementary Table 20	The concordance rate of host genetic variants calling between the blood sample and extracting from tongue dorsum sample

## Sheet: ST1
Supplementary Table 1. Sample and data production summary.
	Charls discovery	Charls replication	4DSZ	total
sample size	8331	3049	2017	13397
female %(n)	54.7(4,557)	51.6(1,573)	56.62(1,142)
Age (year)	65 ± 9	65.04 ± 10	30.46 ± 5.47
BMI (kg·m2)	24.37 ± 3.65	23.96 ± 3.74	22.43 ± 3.40
Whole genome sequencing(WGS)	20.30× (± 3.86×)	4.20× (± 1.89×)	32.88× (± 9.16×)
Whole metagenome sequencing(WMS)	17.60 ± 3.61Gb	20.07 ± 5.13Gb	19.18 ± 7.90
All percentages are calculated based on the total number of individuals in the respective cohort.
WGS: reads mapped to human reference genome(hg38)/total reads

## Sheet: ST2
Supplementary Table 2. Microbiome-PCoA associations that were assessed using envfit (R package vegan) with 9,999 permutations. The analysis was performed on Hellinger-transformed genus-level abundance data (prevalence >10%) and PCoA coordinates (Bray-Curtis dissimilarity). To balance computational efficiency and statistical power, 3,000 samples were randomly selected from the full dataset. Signif…
Microbe	coef.	R2	Pvalue	Padj	PCoA_Axis
g__Neisseria	0.69048	0.96391	0.0001	0.000101	1
g__Prevotella	-0.656945	0.965502	0.0001	0.000101	1
g__Megasphaera	-0.518215	0.708611	0.0001	0.000101	1
g__Lancefieldella	-0.395905	0.661636	0.0001	0.000101	1
g__GGB3887	-0.35146	0.455418	0.0001	0.000101	1
g__GGB1202	-0.322971	0.537629	0.0001	0.000101	1
g__Solobacterium	-0.283873	0.453903	0.0001	0.000101	1
g__Mogibacterium	-0.280655	0.556106	0.0001	0.000101	1
g__Porphyromonas	0.267812	0.899175	0.0001	0.000101	1
g__GGB1843	0.231465	0.498561	0.0001	0.000101	1
g__Streptococcus	0.792105	0.887898	0.0001	0.000101	2
g__Rothia	0.684739	0.775074	0.0001	0.000101	2
g__Granulicatella	0.534957	0.65248	0.0001	0.000101	2
g__Gemella	0.533561	0.476917	0.0001	0.000101	2
g__Prevotella	-0.464571	0.965502	0.0001	0.000101	2
g__GGB10485	0.433362	0.365545	0.0001	0.000101	2
g__GGB1144	-0.391957	0.81652	0.0001	0.000101	2
g__GGB1203	-0.379977	0.468557	0.0001	0.000101	2
g__Neisseria	-0.341939	0.96391	0.0001	0.000101	2
g__Corynebacterium	0.338647	0.255041	0.0001	0.000101	2
g__Porphyromonas	0.698242	0.899175	0.0001	0.000101	3
g__Fusobacterium	0.469556	0.680913	0.0001	0.000101	3
g__Candidatus_Absconditabacteria_unclassified	0.456091	0.382905	0.0001	0.000101	3
g__Peptostreptococcus	0.443971	0.393655	0.0001	0.000101	3
g__GGB74353	0.399072	0.431927	0.0001	0.000101	3
g__Parvimonas	0.398759	0.264339	0.0001	0.000101	3
g__GGB4936	0.384867	0.4015	0.0001	0.000101	3
g__GGB3887	-0.358103	0.455418	0.0001	0.000101	3
g__Prevotellaceae_unclassified	0.345833	0.356101	0.0001	0.000101	3
g__GGB72533	0.330007	0.170341	0.0001	0.000101	3
g__Haemophilus	-0.58708	0.820886	0.0001	0.000101	4
g__Selenomonas	0.582659	0.422231	0.0001	0.000101	4
g__Lachnospiraceae_unclassified	0.56955	0.408661	0.0001	0.000101	4
g__Leptotrichia	0.54918	0.58483	0.0001	0.000101	4
g__GGB4533	0.481899	0.3106	0.0001	0.000101	4
g__Megasphaera	0.481018	0.708611	0.0001	0.000101	4
g__Campylobacter	0.480128	0.457073	0.0001	0.000101	4
g__Tannerella	0.477764	0.57266	0.0001	0.000101	4
g__GGB3886	0.435954	0.366367	0.0001	0.000101	4
g__GGB74353	0.401655	0.431927	0.0001	0.000101	4
g__Veillonella	-0.491311	0.897152	0.0001	0.000101	5
g__Filifactor	0.480375	0.687142	0.0001	0.000101	5
g__Treponema	0.406808	0.63837	0.0001	0.000101	5
g__GGB1203	-0.403206	0.468557	0.0001	0.000101	5
g__Neisseria	-0.401378	0.96391	0.0001	0.000101	5
g__GGB1202	0.385218	0.537629	0.0001	0.000101	5
g__GGB49400	0.383925	0.426321	0.0001	0.000101	5
g__GGB10852	0.383572	0.448995	0.0001	0.000101	5
g__GGB4333	0.375695	0.453447	0.0001	0.000101	5
g__GGB49229	0.373461	0.455518	0.0001	0.000101	5
g__Alloprevotella	-0.53039	0.814816	0.0001	0.000101	6
g__Fusobacterium	0.478609	0.680913	0.0001	0.000101	6
g__Veillonella	0.460642	0.897152	0.0001	0.000101	6
g__GGB4783	0.395008	0.403441	0.0001	0.000101	6
g__GGB3385	0.372304	0.443445	0.0001	0.000101	6
g__GGB1202	-0.3537	0.537629	0.0001	0.000101	6
g__Aggregatibacter	-0.33661	0.238391	0.0001	0.000101	6
g__Stomatobaculum	0.32639	0.5034	0.0001	0.000101	6
g__Shuttleworthia	-0.325826	0.265616	0.0001	0.000101	6
g__GGB2672	0.32421	0.36001	0.0001	0.000101	6
g__Filifactor	0.456141	0.687142	0.0001	0.000101	7
g__Treponema	0.412154	0.63837	0.0001	0.000101	7
g__Prevotella	0.408875	0.965502	0.0001	0.000101	7
g__GGB1144	-0.408591	0.81652	0.0001	0.000101	7
g__Alloprevotella	-0.404006	0.814816	0.0001	0.000101	7
g__GGB49504	0.400051	0.483619	0.0001	0.000101	7
g__GGB4936	-0.387071	0.4015	0.0001	0.000101	7
g__GGB10852	0.383565	0.448995	0.0001	0.000101	7
g__GGB4333	0.374456	0.453447	0.0001	0.000101	7
g__Prevotellaceae_unclassified	-0.363395	0.356101	0.0001	0.000101	7
g__Capnocytophaga	-0.467326	0.432771	0.0001	0.000101	8
g__GGB4937	-0.354978	0.312327	0.0001	0.000101	8
g__GGB7107	-0.338577	0.328185	0.0001	0.000101	8
g__GGB3385	-0.325354	0.443445	0.0001	0.000101	8
g__Eubacteriales_Family_XIII_Incertae_Sedis_unclassified	0.30346	0.430493	0.0001	0.000101	8
g__Lancefieldella	0.297037	0.661636	0.0001	0.000101	8
g__Mogibacterium	0.280134	0.556106	0.0001	0.000101	8
g__GGB1833	-0.270867	0.122207	0.0001	0.000101	8
g__Lautropia	-0.267276	0.26265	0.0001	0.000101	8
g__Porphyromonas	0.266725	0.899175	0.0001	0.000101	8
g__Lancefieldella	0.448566	0.661636	0.0001	0.000101	9
g__Haemophilus	-0.39246	0.820886	0.0001	0.000101	9
g__Veillonella	-0.370339	0.897152	0.0001	0.000101	9
g__Actinomyces	0.341792	0.84962	0.0001	0.000101	9
g__GGB1144	0.327016	0.81652	0.0001	0.000101	9
g__GGB1843	-0.304283	0.498561	0.0001	0.000101	9
g__Alloprevotella	-0.301994	0.814816	0.0001	0.000101	9
g__Prevotella	0.298799	0.965502	0.0001	0.000101	9
g__GGB3887	0.252924	0.455418	0.0001	0.000101	9
g__Capnocytophaga	-0.233067	0.432771	0.0001	0.000101	9
g__Actinomyces	0.639219	0.84962	0.0001	0.000101	10
g__Candidatus_Saccharibacteria_unclassified	0.465014	0.400484	0.0001	0.000101	10
g__Lachnoanaerobaculum	0.393813	0.491288	0.0001	0.000101	10
g__GGB7107	-0.388634	0.328185	0.0001	0.000101	10
g__Stomatobaculum	0.382482	0.5034	0.0001	0.000101	10
g__Solobacterium	0.382156	0.453903	0.0001	0.000101	10
g__Veillonella	-0.372087	0.897152	0.0001	0.000101	10
g__Mogibacterium	0.370698	0.556106	0.0001	0.000101	10
g__Haemophilus	0.362785	0.820886	0.0001	0.000101	10
g__Oribacterium	0.351294	0.364858	0.0001	0.000101	10

## Sheet: ST3
Supplementary Table 3. Correlations between host confounders and microbial diversities (alpha diversity and beta diversity PCoAs).
Microbial diversity	host genetic and non-genetic factors	Beta	SE	T_value	P_value	N	P_adj_BH	P_adj_Bonferroni
Div_Shannon	age	0.0067708	0.0086809	0.779965	0.435425	13397	0.623177	1
Div_Shannon	sex	-0.113417	0.00861184	-13.17	2.30103e-39	13397	5.98267e-38	3.5896e-37
Div_Shannon	BMI	0.0227531	0.00875182	2.59981	0.00933787	13397	0.0354907	1
Div_Shannon	pc1	0.0126283	0.00872584	1.44723	0.147855	13397	0.315964	1
Div_Shannon	pc2	-0.0576689	0.00859823	-6.70706	2.06586e-11	13397	2.01421e-10	3.22274e-09
Div_Shannon	pc3	0.0165502	0.00858066	1.92878	0.053779	13397	0.150977	1
Div_Shannon	pc4	-0.0105242	0.00858473	-1.22592	0.220251	13397	0.409037	1
Div_Shannon	pc5	0.000569992	0.00858434	0.0663991	0.947061	13397	0.965631	1
Div_Shannon	pc6	0.0106037	0.00858233	1.23553	0.216656	13397	0.407208	1
Div_Shannon	pc7	-0.00797148	0.00859232	-0.927745	0.353556	13397	0.552973	1
Div_Shannon	pc8	-0.0193113	0.0086026	-2.24482	0.0247959	13397	0.0800997	1
Div_Shannon	pc9	0.0050293	0.00858114	0.586088	0.557827	13397	0.731268	1
Div_Shannon	pc10	0.0291072	0.00859446	3.38674	0.000709335	13397	0.00345801	0.110656
Div_simpson	age	-0.0633051	0.00871119	-7.2671	3.87719e-13	13397	4.03228e-12	6.04842e-11
Div_simpson	sex	-0.0756728	0.00864188	-8.75651	2.25405e-18	13397	2.93026e-17	3.51632e-16
Div_simpson	BMI	0.00914059	0.00878236	1.04079	0.297992	13397	0.51426	1
Div_simpson	pc1	-0.00157542	0.00875629	-0.179919	0.857219	13397	0.922249	1
Div_simpson	pc2	-0.0479467	0.00862823	-5.55696	2.79783e-08	13397	2.18231e-07	4.36462e-06
Div_simpson	pc3	0.0120714	0.0086106	1.40193	0.160961	13397	0.334798	1
Div_simpson	pc4	-0.00788649	0.00861468	-0.91547	0.359961	13397	0.552973	1
Div_simpson	pc5	0.00139718	0.00861429	0.162193	0.871156	13397	0.924493	1
Div_simpson	pc6	0.0111444	0.00861228	1.29402	0.195682	13397	0.391365	1
Div_simpson	pc7	-0.00552744	0.0086223	-0.641064	0.521492	13397	0.701317	1
Div_simpson	pc8	-0.0156162	0.00863262	-1.80898	0.0704771	13397	0.174515	1
Div_simpson	pc9	0.00619676	0.00861108	0.719626	0.471768	13397	0.657552	1
Div_simpson	pc10	0.021431	0.00862445	2.48491	0.0129705	13397	0.0449642	1
PCoA1	age	-0.00793847	0.00873057	-0.909273	0.363223	13397	0.552973	1
PCoA1	BMI	-0.00722667	0.0088019	-0.821035	0.411641	13397	0.605811	1
PCoA1	pc1	0.0651181	0.00877577	7.42022	1.24005e-13	13397	1.38177e-12	1.93447e-11
PCoA1	pc2	0.0317522	0.00864742	3.67187	0.000241722	13397	0.00125695	0.0377086
PCoA1	pc3	-0.0240608	0.00862976	-2.78812	0.00530897	13397	0.0230055	0.828199
PCoA1	pc4	0.0047185	0.00863385	0.546512	0.584723	13397	0.743957	1
PCoA1	pc5	-0.0189598	0.00863345	-2.19608	0.0281032	13397	0.0876819	1
PCoA1	pc6	-0.00437228	0.00863144	-0.506553	0.612477	13397	0.764371	1
PCoA1	pc7	-0.0127001	0.00864148	-1.46967	0.141674	13397	0.306961	1
PCoA1	pc8	-0.017997	0.00865182	-2.08014	0.0375316	13397	0.112595	1
PCoA1	pc9	0.00258143	0.00863024	0.299114	0.764858	13397	0.85227	1
PCoA1	pc10	-0.00594556	0.00864364	-0.687854	0.491557	13397	0.672656	1
PCoA1	sex	-0.0144149	0.00866111	-1.66432	0.0960718	13397	0.2204	1
PCoA2	age	0.107601	0.00863065	12.4673	1.77541e-35	13397	3.46205e-34	2.76964e-33
PCoA2	BMI	0.0363432	0.00870115	4.17683	2.97482e-05	13397	0.000178489	0.00464071
PCoA2	pc1	0.047899	0.00867533	5.5213	3.42803e-08	13397	2.54654e-07	5.34773e-06
PCoA2	pc2	-0.112074	0.00854845	-13.1104	5.00357e-39	13397	1.11508e-37	7.80556e-37
PCoA2	pc3	0.0170415	0.00853099	1.9976	0.04578	13397	0.132253	1
PCoA2	pc4	-0.00347383	0.00853503	-0.407009	0.684008	13397	0.8135	1
PCoA2	pc5	-0.00776707	0.00853464	-0.910064	0.362805	13397	0.552973	1
PCoA2	pc6	0.00641584	0.00853265	0.751917	0.452114	13397	0.641181	1
PCoA2	pc7	0.00768009	0.00854257	0.899037	0.368649	13397	0.552973	1
PCoA2	pc8	0.00393089	0.0085528	0.459603	0.645809	13397	0.793277	1
PCoA2	pc9	-0.00588304	0.00853146	-0.68957	0.490476	13397	0.672656	1
PCoA2	pc10	0.0128231	0.00854471	1.50071	0.133455	13397	0.301724	1
PCoA2	sex	-0.0162468	0.00856198	-1.89755	0.0577765	13397	0.152765	1
PCoA3	age	-0.0985473	0.00862871	-11.4209	4.53856e-30	13397	7.08015e-29	7.08015e-28
PCoA3	BMI	0.00901678	0.00869921	1.03651	0.299985	13397	0.51426	1
PCoA3	pc1	-0.00343472	0.00867339	-0.396007	0.692106	13397	0.8135	1
PCoA3	pc2	0.00464769	0.00854653	0.54381	0.586581	13397	0.743957	1
PCoA3	pc3	0.00613331	0.00852908	0.719105	0.472089	13397	0.657552	1
PCoA3	pc4	0.00283593	0.00853312	0.332344	0.739635	13397	0.836109	1
PCoA3	pc5	0.0109521	0.00853273	1.28354	0.199326	13397	0.393606	1
PCoA3	pc6	0.0145326	0.00853074	1.70356	0.0884866	13397	0.206029	1
PCoA3	pc7	-0.0126759	0.00854066	-1.48418	0.137785	13397	0.306961	1
PCoA3	pc8	-0.0151227	0.00855089	-1.76856	0.076991	13397	0.184778	1
PCoA3	pc9	0.00934997	0.00852955	1.09619	0.273018	13397	0.478548	1
PCoA3	pc10	0.0228661	0.00854279	2.67665	0.00744525	13397	0.029781	1
PCoA3	sex	-0.147743	0.00856006	-17.2596	4.9372e-66	13397	2.56735e-64	7.70204e-64
PCoA4	age	0.283907	0.00838318	33.8663	2.98012e-241	13397	4.64899e-239	4.64899e-239
PCoA4	BMI	-0.0155494	0.00845166	-1.8398	0.0658193	13397	0.16561	1
PCoA4	pc1	0.0212572	0.00842658	2.52263	0.0116595	13397	0.0413381	1
PCoA4	pc2	-0.0104315	0.00830333	-1.2563	0.209029	13397	0.402575	1
PCoA4	pc3	0.00922226	0.00828638	1.11294	0.265753	13397	0.471108	1
PCoA4	pc4	-0.0159512	0.0082903	-1.92408	0.0543662	13397	0.150977	1
PCoA4	pc5	-0.010464	0.00828992	-1.26226	0.206878	13397	0.402575	1
PCoA4	pc6	2.5988e-05	0.00828799	0.00313562	0.997498	13397	0.997498	1
PCoA4	pc7	-0.00658741	0.00829763	-0.793891	0.427273	13397	0.617172	1
PCoA4	pc8	-0.0277045	0.00830756	-3.33485	0.000855779	13397	0.0040455	0.133501
PCoA4	pc9	-0.00513286	0.00828684	-0.619399	0.535664	13397	0.708166	1
PCoA4	pc10	0.0157991	0.0082997	1.90358	0.0569864	13397	0.152765	1
PCoA4	sex	-0.00809498	0.00831648	-0.973367	0.330389	13397	0.542533	1
PCoA5	age	0.193684	0.00854355	22.6702	1.12377e-111	13397	8.76539e-110	1.75308e-109
PCoA5	BMI	0.0342027	0.00861335	3.9709	7.19785e-05	13397	0.000401023	0.0112287
PCoA5	pc1	0.0406816	0.00858778	4.73715	2.18978e-06	13397	1.42336e-05	0.000341606
PCoA5	pc2	-0.0219331	0.00846219	-2.5919	0.00955518	13397	0.0354907	1
PCoA5	pc3	0.0120248	0.0084449	1.42391	0.154497	13397	0.325696	1
PCoA5	pc4	0.0151908	0.0084489	1.79796	0.0722062	13397	0.176003	1
PCoA5	pc5	0.000651037	0.00844852	0.0770593	0.938578	13397	0.963277	1
PCoA5	pc6	-0.00332824	0.00844654	-0.394035	0.693561	13397	0.8135	1
PCoA5	pc7	0.00535144	0.00845637	0.63283	0.526856	13397	0.702474	1
PCoA5	pc8	0.0110895	0.00846649	1.30981	0.190281	13397	0.385505	1
PCoA5	pc9	-0.0030708	0.00844537	-0.363608	0.716157	13397	0.823342	1
PCoA5	pc10	-0.00305714	0.00845848	-0.361428	0.717785	13397	0.823342	1
PCoA5	sex	-0.0831998	0.00847558	-9.81642	1.14197e-22	13397	1.61951e-21	1.78147e-20
PCoA6	age	0.0440741	0.00874514	5.03984	4.72022e-07	13397	3.29022e-06	7.36354e-05
PCoA6	BMI	0.0109761	0.00881659	1.24494	0.213177	13397	0.405557	1
PCoA6	pc1	-0.010198	0.00879042	-1.16013	0.246016	13397	0.446262	1
PCoA6	pc2	-0.0150749	0.00866185	-1.74038	0.0818157	13397	0.193383	1
PCoA6	pc3	-0.00823632	0.00864416	-0.952819	0.340699	13397	0.549193	1
PCoA6	pc4	-0.00300161	0.00864826	-0.347077	0.728539	13397	0.829577	1
PCoA6	pc5	0.00342254	0.00864786	0.395767	0.692283	13397	0.8135	1
PCoA6	pc6	0.000831911	0.00864584	0.0962209	0.923347	13397	0.953921	1
PCoA6	pc7	-0.018099	0.0086559	-2.09095	0.0365518	13397	0.111805	1
PCoA6	pc8	-0.00164681	0.00866626	-0.190026	0.849292	13397	0.920066	1
PCoA6	pc9	-0.0165782	0.00864464	-1.91774	0.0551648	13397	0.150977	1
PCoA6	pc10	0.0219804	0.00865806	2.53872	0.0111372	13397	0.0404049	1
PCoA6	sex	0.00872991	0.00867556	1.00626	0.314307	13397	0.532955	1
PCoA7	age	0.117516	0.00867626	13.5445	1.60675e-41	13397	5.01306e-40	2.50653e-39
PCoA7	BMI	0.0554438	0.00874714	6.33851	2.3947e-10	13397	2.19749e-09	3.73573e-08
PCoA7	pc1	0.0314668	0.00872117	3.60809	0.000309589	13397	0.00155793	0.0482959
PCoA7	pc2	0.0126357	0.00859363	1.47036	0.141489	13397	0.306961	1
PCoA7	pc3	0.00234998	0.00857607	0.274016	0.784077	13397	0.867489	1
PCoA7	pc4	0.00395704	0.00858013	0.461187	0.644672	13397	0.793277	1
PCoA7	pc5	-0.00264738	0.00857974	-0.308561	0.75766	13397	0.850323	1
PCoA7	pc6	-0.00201169	0.00857774	-0.234525	0.814581	13397	0.888634	1
PCoA7	pc7	-0.0231062	0.00858772	-2.69061	0.00714114	13397	0.0293163	1
PCoA7	pc8	-0.0192526	0.008598	-2.2392	0.0251595	13397	0.0800997	1
PCoA7	pc9	-0.00331583	0.00857655	-0.386616	0.699047	13397	0.813815	1
PCoA7	pc10	0.00222784	0.00858986	0.259356	0.795364	13397	0.87378	1
PCoA7	sex	0.0253633	0.00860723	2.94675	0.00321689	13397	0.0147598	0.501835
PCoA8	age	-0.0439958	0.00873869	-5.0346	4.85096e-07	13397	3.29022e-06	7.5675e-05
PCoA8	BMI	0.033656	0.00881008	3.82017	0.000133965	13397	0.00072064	0.0208986
PCoA8	pc1	-0.0255631	0.00878393	-2.91022	0.00361777	13397	0.0161249	0.564373
PCoA8	pc2	0.004865	0.00865546	0.562073	0.574076	13397	0.743957	1
PCoA8	pc3	-0.00583615	0.00863778	-0.675654	0.499272	13397	0.677273	1
PCoA8	pc4	-0.00851483	0.00864187	-0.9853	0.324495	13397	0.542533	1
PCoA8	pc5	0.00457198	0.00864148	0.529074	0.596763	13397	0.750766	1
PCoA8	pc6	0.0226964	0.00863946	2.62706	0.00862239	13397	0.0336273	1
PCoA8	pc7	0.0101433	0.00864951	1.1727	0.240935	13397	0.442187	1
PCoA8	pc8	0.000995478	0.00865987	0.114953	0.908484	13397	0.947825	1
PCoA8	pc9	0.0047315	0.00863826	0.547738	0.583881	13397	0.743957	1
PCoA8	pc10	-0.0240193	0.00865167	-2.77626	0.00550651	13397	0.0232166	0.859015
PCoA8	sex	-0.020176	0.00866916	-2.32733	0.0199624	13397	0.066258	1
PCoA9	age	0.0160667	0.00872357	1.84176	0.0655324	13397	0.16561	1
PCoA9	BMI	-0.0179523	0.00879484	-2.04123	0.0412474	13397	0.121407	1
PCoA9	pc1	0.035933	0.00876874	4.09786	4.19463e-05	13397	0.000242356	0.00654362
PCoA9	pc2	0.0710447	0.00864049	8.2223	2.17982e-16	13397	2.61578e-15	3.40051e-14
PCoA9	pc3	-0.00351714	0.00862284	-0.407886	0.683364	13397	0.8135	1
PCoA9	pc4	0.00735307	0.00862693	0.852339	0.394041	13397	0.585433	1
PCoA9	pc5	0.011598	0.00862654	1.34445	0.178825	13397	0.367062	1
PCoA9	pc6	-0.000960018	0.00862452	-0.111313	0.91137	13397	0.947825	1
PCoA9	pc7	0.00695756	0.00863455	0.805782	0.420383	13397	0.612895	1
PCoA9	pc8	0.000451272	0.00864489	0.0522011	0.958369	13397	0.970816	1
PCoA9	pc9	-0.00100236	0.00862332	-0.116238	0.907466	13397	0.947825	1
PCoA9	pc10	-0.0159496	0.00863671	-1.84673	0.064809	13397	0.16561	1
PCoA9	sex	-0.0366412	0.00865417	-4.23393	2.31179e-05	13397	0.000144255	0.00360639
PCoA10	age	-0.147345	0.00858124	-17.1706	2.22173e-65	13397	8.66476e-64	3.4659e-63
PCoA10	BMI	-0.00822975	0.00865134	-0.951268	0.341486	13397	0.549193	1
PCoA10	pc1	0.106396	0.00862567	12.3349	9.09577e-35	13397	1.5766e-33	1.41894e-32
PCoA10	pc2	0.0510607	0.00849951	6.00749	1.93332e-09	13397	1.67554e-08	3.01598e-07
PCoA10	pc3	-0.02068	0.00848215	-2.43806	0.0147793	13397	0.0501211	1
PCoA10	pc4	0.00763476	0.00848617	0.899671	0.368312	13397	0.552973	1
PCoA10	pc5	-0.00382019	0.00848578	-0.450187	0.652583	13397	0.795335	1
PCoA10	pc6	-0.000274614	0.0084838	-0.0323693	0.974178	13397	0.980463	1
PCoA10	pc7	-0.00783444	0.00849367	-0.922386	0.356344	13397	0.552973	1
PCoA10	pc8	0.00833441	0.00850384	0.980076	0.327066	13397	0.542533	1
PCoA10	pc9	0.00962594	0.00848262	1.13478	0.256486	13397	0.459907	1
PCoA10	sex	-0.0508389	0.00851297	-5.97194	2.40421e-09	13397	1.97398e-08	3.75057e-07
PCoA10	pc10	-0.00146242	0.00849579	-0.172134	0.863334	13397	0.922467	1

## Sheet: ST4
Supplementary Table 4. the explained variance of microbial beta diversity by host confounders (PERMANOVA test, 1000 permutations).
host confounders	variance explained (%)	p-value
sex	0.20638	0.001
age	0.444632	0.001
BMI	0.0389518	0.005
pc1	0.309923	0.001
pc2	0.204126	0.001
pc3	0.0530938	0.002
pc4	0.00233547	0.792
pc5	0.0344059	0.019
pc6	0.00355624	0.611
pc7	0.014081	0.142
pc8	0.0325848	0.019
pc9	0.00109069	0.969
pc10	0.0118725	0.211

## Sheet: ST5
Supplementary Table 5. The average relative abundances and occurrence rates of 534 tongue dorsum microbial taxa used for M-GWAS analysis across the three cohorts. “mean relative abundance” colomn means the average relative abundance of the taxon in all individuals from the cohort, while “occurrence rate” colomn means the prevalence of the taxon in all individuals. "model" colomn indicates whether…
Supplementary Table 5. The average relative abundances and occurrence rates of 534 tongue dorsum microbial taxa used for M-GWAS analysis across the three cohorts. “mean relative abundance” colomn means the average relative abundance of the taxon in all individuals from the cohort, while “occurrence rate” colomn means the prevalence of the taxon in all individuals. "model" colomn indicates whether…
			CHARLS Discovery		CHARLS Replication		4DSZ
model	taxa in tongue dorsum	full name of taxa	mean relative abundance	occurrence rate	mean relative abundance	occurrence rate	mean relative abundance	occurrence rate
linear regression model	p__Firmicutes	k__Bacteria|p__Firmicutes	0.153137	1	0.179	1	0.145501	1
linear regression model	p__Proteobacteria	k__Bacteria|p__Proteobacteria	0.313756	1	0.318	0.9997	0.301035	1
linear regression model	c__Bacilli	k__Bacteria|p__Firmicutes|c__Bacilli	0.0407146	1	0.062	1	0.0342532	1
linear regression model	c__Betaproteobacteria	k__Bacteria|p__Proteobacteria|c__Betaproteobacteria	0.261644	1	0.263	0.9997	0.234535	1
linear regression model	g__Streptococcus	k__Bacteria|p__Firmicutes|c__Bacilli|o__Lactobacillales|f__Streptococcaceae|g__Streptococcus	0.0298501	1	0.0464	1	0.0258924	1
linear regression model	o__Lactobacillales	k__Bacteria|p__Firmicutes|c__Bacilli|o__Lactobacillales	0.0378791	1	0.058	1	0.0329547	1
linear regression model	o__Bacteroidales	k__Bacteria|p__Bacteroidetes|c__Bacteroidia|o__Bacteroidales	0.390279	0.99988	0.332	1	0.438415	1
linear regression model	p__Bacteroidetes	k__Bacteria|p__Bacteroidetes	0.418419	0.99988	0.362	1	0.459462	1
linear regression model	c__Actinomycetia	k__Bacteria|p__Actinobacteria|c__Actinomycetia	0.0390244	0.99976	0.0556	1	0.0294345	1
linear regression model	f__Prevotellaceae	k__Bacteria|p__Bacteroidetes|c__Bacteroidia|o__Bacteroidales|f__Prevotellaceae	0.322334	0.99976	0.264	1	0.374241	1
linear regression model	g__Prevotella	k__Bacteria|p__Bacteroidetes|c__Bacteroidia|o__Bacteroidales|f__Prevotellaceae|g__Prevotella	0.262496	0.99976	0.222	1	0.282645	1
linear regression model	p__Actinobacteria	k__Bacteria|p__Actinobacteria	0.0435191	0.99976	0.0603	1	0.0332577	1
linear regression model	s__Neisseria_subflava	k__Bacteria|p__Proteobacteria|c__Betaproteobacteria|o__Neisseriales|f__Neisseriaceae|g__Neisseria|s__Neisseria_subflava	0.233979	0.99976	0.226	0.999	0.226257	1
linear regression model	c__Negativicutes	k__Bacteria|p__Firmicutes|c__Negativicutes	0.0766331	0.99964	0.0795	1	0.0800389	1
linear regression model	g__Veillonella	k__Bacteria|p__Firmicutes|c__Negativicutes|o__Veillonellales|f__Veillonellaceae|g__Veillonella	0.0680909	0.99964	0.0706	1	0.0741043	1
linear regression model	o__Veillonellales	k__Bacteria|p__Firmicutes|c__Negativicutes|o__Veillonellales	0.0738164	0.99964	0.0763	1	0.0783401	1
linear regression model	c__Fusobacteriia	k__Bacteria|p__Fusobacteria|c__Fusobacteriia	0.0436887	0.99916	0.0501	0.999	0.0316085	1
linear regression model	o__Actinomycetales	k__Bacteria|p__Actinobacteria|c__Actinomycetia|o__Actinomycetales	0.0247022	0.99904	0.0328	0.997	0.023378	1
linear regression model	s__Prevotella_melaninogenica	k__Bacteria|p__Bacteroidetes|c__Bacteroidia|o__Bacteroidales|f__Prevotellaceae|g__Prevotella|s__Prevotella_melaninogenica	0.0922281	0.99904	0.0742	0.9967	0.11097	1
linear regression model	c__Flavobacteriia	k__Bacteria|p__Bacteroidetes|c__Flavobacteriia	0.0146615	0.9988	0.0164	0.9957	0.0133262	1
linear regression model	c__Gammaproteobacteria	k__Bacteria|p__Proteobacteria|c__Gammaproteobacteria	0.0338427	0.998559	0.0358	0.9941	0.0524403	1
linear regression model	s__Rothia_mucilaginosa	k__Bacteria|p__Actinobacteria|c__Actinomycetia|o__Micrococcales|f__Micrococcaceae|g__Rothia|s__Rothia_mucilaginosa	0.0109216	0.998559	0.018	0.9964	0.00552322	0.999484
linear regression model	g__Fusobacterium	k__Bacteria|p__Fusobacteria|c__Fusobacteriia|o__Fusobacteriales|f__Fusobacteriaceae|g__Fusobacterium	0.030655	0.998439	0.0337	0.9974	0.0219397	0.998453
linear regression model	f__Porphyromonadaceae	k__Bacteria|p__Bacteroidetes|c__Bacteroidia|o__Bacteroidales|f__Porphyromonadaceae	0.0632496	0.998319	0.0618	0.997	0.0657168	1
linear regression model	f__Flavobacteriaceae	k__Bacteria|p__Bacteroidetes|c__Flavobacteriia|o__Flavobacteriales|f__Flavobacteriaceae	0.0124059	0.998199	0.0137	0.9941	0.00973585	1
linear regression model	g__Capnocytophaga	k__Bacteria|p__Bacteroidetes|c__Flavobacteriia|o__Flavobacteriales|f__Flavobacteriaceae|g__Capnocytophaga	0.0116186	0.998199	0.0129	0.9941	0.00910517	1
linear regression model	f__Campylobacteraceae	k__Bacteria|p__Proteobacteria|c__Epsilonproteobacteria|o__Campylobacterales|f__Campylobacteraceae	0.00976255	0.998079	0.0107	0.9964	0.00921292	0.999484
linear regression model	g__Granulicatella	k__Bacteria|p__Firmicutes|c__Bacilli|o__Lactobacillales|f__Carnobacteriaceae|g__Granulicatella	0.00541016	0.998079	0.00747	0.9954	0.00625106	1
linear regression model	g__Porphyromonas	k__Bacteria|p__Bacteroidetes|c__Bacteroidia|o__Bacteroidales|f__Porphyromonadaceae|g__Porphyromonas	0.0614945	0.998079	0.0604	0.997	0.0635134	1
linear regression model	o__Eubacteriales	k__Bacteria|p__Firmicutes|c__Clostridia|o__Eubacteriales	0.0259479	0.997839	0.0273	0.997	0.0242272	0.999484
linear regression model	s__Fusobacterium_nucleatum	k__Bacteria|p__Fusobacteria|c__Fusobacteriia|o__Fusobacteriales|f__Fusobacteriaceae|g__Fusobacterium|s__Fusobacterium_nucleatum	0.00700252	0.997719	0.0102	0.9967	0.00175284	0.997937
linear regression model	f__Leptotrichiaceae	k__Bacteria|p__Fusobacteria|c__Fusobacteriia|o__Fusobacteriales|f__Leptotrichiaceae	0.0129861	0.997479	0.0164	0.9944	0.00978034	0.999484
linear regression model	f__Pasteurellaceae	k__Bacteria|p__Proteobacteria|c__Gammaproteobacteria|o__Pasteurellales|f__Pasteurellaceae	0.03344	0.997479	0.0351	0.9921	0.0531761	1
linear regression model	g__Leptotrichia	k__Bacteria|p__Fusobacteria|c__Fusobacteriia|o__Fusobacteriales|f__Leptotrichiaceae|g__Leptotrichia	0.0122495	0.997119	0.0155	0.9931	0.0094675	0.998969
linear regression model	s__Granulicatella_SGB8255	k__Bacteria|p__Firmicutes|c__Bacilli|o__Lactobacillales|f__Carnobacteriaceae|g__Granulicatella|s__Granulicatella_SGB8255	0.00500083	0.997119	0.00705	0.9938	0.00592626	1
linear regression model	o__Bacillales	k__Bacteria|p__Firmicutes|c__Bacilli|o__Bacillales	0.0028355	0.996639	0.00402	0.9888	0.00190625	1
linear regression model	f__Lachnospiraceae	k__Bacteria|p__Firmicutes|c__Clostridia|o__Eubacteriales|f__Lachnospiraceae	0.00932004	0.995678	0.0118	0.9941	0.00966122	0.999484
linear regression model	f__Bacillales_unclassified	k__Bacteria|p__Firmicutes|c__Bacilli|o__Bacillales|f__Bacillales_unclassified	0.00275177	0.995558	0.00386	0.9882	0.00191963	1
linear regression model	g__Haemophilus	k__Bacteria|p__Proteobacteria|c__Gammaproteobacteria|o__Pasteurellales|f__Pasteurellaceae|g__Haemophilus	0.0281874	0.995558	0.0291	0.9885	0.0500531	1
linear regression model	s__Streptococcus_mitis	k__Bacteria|p__Firmicutes|c__Bacilli|o__Lactobacillales|f__Streptococcaceae|g__Streptococcus|s__Streptococcus_mitis	0.00491276	0.994598	0.00701	0.9905	0.0051267	1
linear regression model	s__Veillonella_parvula	k__Bacteria|p__Firmicutes|c__Negativicutes|o__Veillonellales|f__Veillonellaceae|g__Veillonella|s__Veillonella_parvula	0.00401095	0.994238	0.0047	0.9928	0.00160332	0.997937
linear regression model	g__Alloprevotella	k__Bacteria|p__Bacteroidetes|c__Bacteroidia|o__Bacteroidales|f__Prevotellaceae|g__Alloprevotella	0.0299041	0.993878	0.0234	0.9902	0.0338347	0.999484
linear regression model	p__Candidatus_Saccharibacteria	k__Bacteria|p__Candidatus_Saccharibacteria	0.00709138	0.993878	0.00809	0.9921	0.00950994	0.996906
linear regression model	f__Eubacteriales_Family_XIII_Incertae_Sedis	k__Bacteria|p__Firmicutes|c__Clostridia|o__Eubacteriales|f__Eubacteriales_Family_XIII_Incertae_Sedis	0.0064376	0.993637	0.00655	0.9911	0.00548419	0.998453
linear regression model	s__Campylobacter_concisus	k__Bacteria|p__Proteobacteria|c__Epsilonproteobacteria|o__Campylobacterales|f__Campylobacteraceae|g__Campylobacter|s__Campylobacter_concisus	0.00684566	0.992677	0.00697	0.9843	0.00686105	0.998453
linear regression model	s__Streptococcus_infantis	k__Bacteria|p__Firmicutes|c__Bacilli|o__Lactobacillales|f__Streptococcaceae|g__Streptococcus|s__Streptococcus_infantis	0.00502103	0.991837	0.00743	0.9816	0.00695576	0.999484
linear regression model	c__CFGB570	k__Bacteria|p__Bacteroidetes|c__CFGB570	0.00573764	0.990396	0.00413	0.9777	0.005614	0.995358
linear regression model	s__Haemophilus_parainfluenzae	k__Bacteria|p__Proteobacteria|c__Gammaproteobacteria|o__Pasteurellales|f__Pasteurellaceae|g__Haemophilus|s__Haemophilus_parainfluenzae	0.0233708	0.990276	0.0246	0.9826	0.0440749	1
linear regression model	g__Eubacteriales_Family_XIII_Incertae_Sedis_unclassified	k__Bacteria|p__Firmicutes|c__Clostridia|o__Eubacteriales|f__Eubacteriales_Family_XIII_Incertae_Sedis|g__Eubacteriales_Family_XIII_Incertae_Sedis_unclassified	0.00406434	0.988235	0.00417	0.9836	0.00362049	0.997937
linear regression model	g__Peptostreptococcus	k__Bacteria|p__Firmicutes|c__Clostridia|o__Eubacteriales|f__Peptostreptococcaceae|g__Peptostreptococcus	0.00804578	0.988235	0.00588	0.979	0.00779684	0.997937
linear regression model	g__Tannerella	k__Bacteria|p__Bacteroidetes|c__Bacteroidia|o__Bacteroidales|f__Tannerellaceae|g__Tannerella	0.00430764	0.987755	0.00589	0.9793	0.00168307	0.993811
linear regression model	s__Prevotella_pallens	k__Bacteria|p__Bacteroidetes|c__Bacteroidia|o__Bacteroidales|f__Prevotellaceae|g__Prevotella|s__Prevotella_pallens	0.0293204	0.987395	0.0197	0.9744	0.0318581	0.995874
linear regression model	s__Prevotella_salivae	k__Bacteria|p__Bacteroidetes|c__Bacteroidia|o__Bacteroidales|f__Prevotellaceae|g__Prevotella|s__Prevotella_salivae	0.0128908	0.987155	0.0108	0.9711	0.0106668	0.990201
linear regression model	o__Candidatus_Saccharibacteria_unclassified	k__Bacteria|p__Candidatus_Saccharibacteria|c__Candidatus_Saccharibacteria_unclassified|o__Candidatus_Saccharibacteria_unclassified	0.00481077	0.986435	0.00514	0.9734	0.00714981	0.995358
linear regression model	f__Treponemataceae	k__Bacteria|p__Spirochaetes|c__Spirochaetia|o__Spirochaetales|f__Treponemataceae	0.00730303	0.984754	0.0106	0.9784	0.00424454	0.990201
linear regression model	p__Spirochaetes	k__Bacteria|p__Spirochaetes	0.00757613	0.984754	0.011	0.9784	0.00424006	0.990201
linear regression model	g__Oribacterium	k__Bacteria|p__Firmicutes|c__Clostridia|o__Eubacteriales|f__Lachnospiraceae|g__Oribacterium	0.00234126	0.984634	0.00278	0.9679	0.00301181	0.998969
linear regression model	g__GGB1144	k__Bacteria|p__Bacteroidetes|c__Bacteroidia|o__Bacteroidales|f__Prevotellaceae|g__GGB1144	0.0271594	0.984274	0.0161	0.9649	0.0468268	0.998969
linear regression model	o__Erysipelotrichales	k__Bacteria|p__Firmicutes|c__Erysipelotrichia|o__Erysipelotrichales	0.00232806	0.984034	0.00243	0.9702	0.00303225	0.994843
linear regression model	g__Mogibacterium	k__Bacteria|p__Firmicutes|c__Clostridia|o__Eubacteriales|f__Eubacteriales_Family_XIII_Incertae_Sedis|g__Mogibacterium	0.00236361	0.983313	0.00237	0.9688	0.00177635	0.992264
linear regression model	g__Treponema	k__Bacteria|p__Spirochaetes|c__Spirochaetia|o__Spirochaetales|f__Treponemataceae|g__Treponema	0.00367041	0.983193	0.00562	0.9761	0.00155645	0.987622
linear regression model	c__Coriobacteriia	k__Bacteria|p__Actinobacteria|c__Coriobacteriia	0.00449468	0.982833	0.00466	0.9688	0.00382636	0.993296
linear regression model	s__Capnocytophaga_gingivalis	k__Bacteria|p__Bacteroidetes|c__Flavobacteriia|o__Flavobacteriales|f__Flavobacteriaceae|g__Capnocytophaga|s__Capnocytophaga_gingivalis	0.00279906	0.982593	0.00291	0.9643	0.00287574	0.997421
linear regression model	s__Gemella_sanguinis	k__Bacteria|p__Firmicutes|c__Bacilli|o__Bacillales|f__Bacillales_unclassified|g__Gemella|s__Gemella_sanguinis	0.00203614	0.981633	0.00298	0.9708	0.0015823	0.997937
linear regression model	f__Selenomonadaceae	k__Bacteria|p__Firmicutes|c__Negativicutes|o__Selenomonadales|f__Selenomonadaceae	0.00281527	0.981032	0.00315	0.9675	0.00227963	0.983497
linear regression model	g__Candidatus_Saccharibacteria_unclassified	k__Bacteria|p__Candidatus_Saccharibacteria|c__Candidatus_Saccharibacteria_unclassified|o__Candidatus_Saccharibacteria_unclassified|f__Candidatus_Saccharibacteria_unclassified|g__Candidatus_Saccharibacteria_unclassified	0.00460642	0.981032	0.00481	0.9629	0.00705615	0.993811
linear regression model	g__Selenomonas	k__Bacteria|p__Firmicutes|c__Negativicutes|o__Selenomonadales|f__Selenomonadaceae|g__Selenomonas	0.00247868	0.980192	0.00279	0.9649	0.00209131	0.982981
linear regression model	g__Lachnoanaerobaculum	k__Bacteria|p__Firmicutes|c__Clostridia|o__Eubacteriales|f__Lachnospiraceae|g__Lachnoanaerobaculum	0.00162507	0.979352	0.00203	0.9583	0.00203522	0.996906
linear regression model	s__Capnocytophaga_leadbetteri	k__Bacteria|p__Bacteroidetes|c__Flavobacteriia|o__Flavobacteriales|f__Flavobacteriaceae|g__Capnocytophaga|s__Capnocytophaga_leadbetteri	0.00186996	0.977551	0.00223	0.9669	0.00142221	0.993296
linear regression model	s__Porphyromonas_pasteri	k__Bacteria|p__Bacteroidetes|c__Bacteroidia|o__Bacteroidales|f__Porphyromonadaceae|g__Porphyromonas|s__Porphyromonas_pasteri	0.0407695	0.977551	0.0341	0.961	0.0553752	1
linear regression model	s__Prevotella_oris	k__Bacteria|p__Bacteroidetes|c__Bacteroidia|o__Bacteroidales|f__Prevotellaceae|g__Prevotella|s__Prevotella_oris	0.0020679	0.977551	0.00238	0.9721	0.000673192	0.980918
linear regression model	g__Lancefieldella	k__Bacteria|p__Actinobacteria|c__Coriobacteriia|o__Coriobacteriales|f__Atopobiaceae|g__Lancefieldella	0.00413765	0.977191	0.00422	0.9551	0.00377133	0.992264
linear regression model	s__Fusobacterium_pseudoperiodonticum	k__Bacteria|p__Fusobacteria|c__Fusobacteriia|o__Fusobacteriales|f__Fusobacteriaceae|g__Fusobacterium|s__Fusobacterium_pseudoperiodonticum	0.0234121	0.976711	0.0232	0.9646	0.020131	0.995358
linear regression model	s__Capnocytophaga_granulosa	k__Bacteria|p__Bacteroidetes|c__Flavobacteriia|o__Flavobacteriales|f__Flavobacteriaceae|g__Capnocytophaga|s__Capnocytophaga_granulosa	0.00177745	0.97623	0.00229	0.958	0.000747938	0.965446
linear regression model	f__Weeksellaceae	k__Bacteria|p__Bacteroidetes|c__Flavobacteriia|o__Flavobacteriales|f__Weeksellaceae	0.00225522	0.97395	0.0027	0.9472	0.00378251	0.998453
linear regression model	s__Veillonella_atypica	k__Bacteria|p__Firmicutes|c__Negativicutes|o__Veillonellales|f__Veillonellaceae|g__Veillonella|s__Veillonella_atypica	0.0172324	0.97383	0.0179	0.9561	0.011018	0.945848
linear regression model	f__Erysipelotrichaceae	k__Bacteria|p__Firmicutes|c__Erysipelotrichia|o__Erysipelotrichales|f__Erysipelotrichaceae	0.00170193	0.973349	0.00153	0.9426	0.00297816	0.994327
linear regression model	g__Solobacterium	k__Bacteria|p__Firmicutes|c__Erysipelotrichia|o__Erysipelotrichales|f__Erysipelotrichaceae|g__Solobacterium	0.00167339	0.971789	0.0015	0.9393	0.00291996	0.994327
linear regression model	s__Capnocytophaga_ochracea	k__Bacteria|p__Bacteroidetes|c__Flavobacteriia|o__Flavobacteriales|f__Flavobacteriaceae|g__Capnocytophaga|s__Capnocytophaga_ochracea	0.00047396	0.971789	0.000731	0.9593	0.000235729	0.984012
linear regression model	s__Prevotella_nigrescens	k__Bacteria|p__Bacteroidetes|c__Bacteroidia|o__Bacteroidales|f__Prevotellaceae|g__Prevotella|s__Prevotella_nigrescens	0.00348955	0.971068	0.00407	0.9626	0.00136006	0.991748
linear regression model	s__Lancefieldella_parvula	k__Bacteria|p__Actinobacteria|c__Coriobacteriia|o__Coriobacteriales|f__Atopobiaceae|g__Lancefieldella|s__Lancefieldella_parvula	0.0038697	0.970468	0.00392	0.9347	0.00371408	0.990717
linear regression model	s__Porphyromonas_endodontalis	k__Bacteria|p__Bacteroidetes|c__Bacteroidia|o__Bacteroidales|f__Porphyromonadaceae|g__Porphyromonas|s__Porphyromonas_endodontalis	0.00496155	0.969988	0.00675	0.962	0.00121176	0.969056
linear regression model	g__Aggregatibacter	k__Bacteria|p__Proteobacteria|c__Gammaproteobacteria|o__Pasteurellales|f__Pasteurellaceae|g__Aggregatibacter	0.00503729	0.969148	0.00577	0.9524	0.00219319	0.991748
linear regression model	g__Catonella	k__Bacteria|p__Firmicutes|c__Clostridia|o__Eubacteriales|f__Lachnospiraceae|g__Catonella	0.00113184	0.968187	0.00121	0.9406	0.00146499	0.996906
linear regression model	o__Burkholderiales	k__Bacteria|p__Proteobacteria|c__Betaproteobacteria|o__Burkholderiales	0.00306536	0.967707	0.00497	0.9577	0.00101719	0.987622
linear regression model	s__Mogibacterium_diversum	k__Bacteria|p__Firmicutes|c__Clostridia|o__Eubacteriales|f__Eubacteriales_Family_XIII_Incertae_Sedis|g__Mogibacterium|s__Mogibacterium_diversum	0.00215157	0.967707	0.00209	0.9393	0.00169572	0.982465
linear regression model	s__GGB1144_SGB1468	k__Bacteria|p__Bacteroidetes|c__Bacteroidia|o__Bacteroidales|f__Prevotellaceae|g__GGB1144|s__GGB1144_SGB1468	0.01223	0.967107	0.00762	0.9249	0.0138087	0.991748
linear regression model	s__Neisseria_sicca	k__Bacteria|p__Proteobacteria|c__Betaproteobacteria|o__Neisseriales|f__Neisseriaceae|g__Neisseria|s__Neisseria_sicca	0.015606	0.965906	0.0198	0.9479	0.00353928	0.934502
linear regression model	s__Leptotrichia_wadei	k__Bacteria|p__Fusobacteria|c__Fusobacteriia|o__Fusobacteriales|f__Leptotrichiaceae|g__Leptotrichia|s__Leptotrichia_wadei	0.0037377	0.965186	0.0052	0.9469	0.00223173	0.934502
linear regression model	g__Dialister	k__Bacteria|p__Firmicutes|c__Negativicutes|o__Veillonellales|f__Veillonellaceae|g__Dialister	0.00109845	0.962185	0.00116	0.9387	0.000286009	0.958226
linear regression model	s__Tannerella_serpentiformis	k__Bacteria|p__Bacteroidetes|c__Bacteroidia|o__Bacteroidales|f__Tannerellaceae|g__Tannerella|s__Tannerella_serpentiformis	0.00236627	0.961945	0.00262	0.9459	0.00125965	0.977308
linear regression model	g__Stomatobaculum	k__Bacteria|p__Firmicutes|c__Clostridia|o__Eubacteriales|f__Lachnospiraceae|g__Stomatobaculum	0.00171156	0.961585	0.0023	0.9397	0.000965278	0.963899
linear regression model	s__Streptococcus_salivarius	k__Bacteria|p__Firmicutes|c__Bacilli|o__Lactobacillales|f__Streptococcaceae|g__Streptococcus|s__Streptococcus_salivarius	0.00709862	0.960744	0.0112	0.9567	0.00485378	0.975245
linear regression model	s__Prevotella_jejuni	k__Bacteria|p__Bacteroidetes|c__Bacteroidia|o__Bacteroidales|f__Prevotellaceae|g__Prevotella|s__Prevotella_jejuni	0.0286716	0.957863	0.0258	0.9206	0.0185268	0.988138
linear regression model	s__Peptostreptococcus_stomatis	k__Bacteria|p__Firmicutes|c__Clostridia|o__Eubacteriales|f__Peptostreptococcaceae|g__Peptostreptococcus|s__Peptostreptococcus_stomatis	0.00145697	0.956903	0.0016	0.941	0.000413099	0.96132
linear regression model	g__GGB1843	k__Bacteria|p__Bacteroidetes|c__Flavobacteriia|o__Flavobacteriales|f__Weeksellaceae|g__GGB1843	0.00136338	0.956423	0.00162	0.9206	0.00198417	0.994843
linear regression model	s__Neisseria_elongata	k__Bacteria|p__Proteobacteria|c__Betaproteobacteria|o__Neisseriales|f__Neisseriaceae|g__Neisseria|s__Neisseria_elongata	0.00317916	0.953301	0.00337	0.9292	0.0019771	0.983497
linear regression model	s__Aggregatibacter_sp_2125159857	k__Bacteria|p__Proteobacteria|c__Gammaproteobacteria|o__Pasteurellales|f__Pasteurellaceae|g__Aggregatibacter|s__Aggregatibacter_sp_2125159857	0.00256653	0.953181	0.00308	0.9315	0.00113202	0.981949
linear regression model	o__OFGB1764	k__Bacteria|p__Firmicutes|c__CFGB1764|o__OFGB1764	0.00371262	0.952581	0.00313	0.9124	0.00198363	0.960289
linear regression model	s__Dialister_invisus	k__Bacteria|p__Firmicutes|c__Negativicutes|o__Veillonellales|f__Veillonellaceae|g__Dialister|s__Dialister_invisus	0.000789347	0.951381	0.000869	0.9249	0.000204794	0.951521
linear regression model	s__Streptococcus_cristatus	k__Bacteria|p__Firmicutes|c__Bacilli|o__Lactobacillales|f__Streptococcaceae|g__Streptococcus|s__Streptococcus_cristatus	0.000520662	0.9509	0.00087	0.9485	9.83653e-05	0.867973
linear regression model	s__Veillonella_rogosae	k__Bacteria|p__Firmicutes|c__Negativicutes|o__Veillonellales|f__Veillonellaceae|g__Veillonella|s__Veillonella_rogosae	0.0150913	0.95078	0.0157	0.9183	0.0326204	1
logistic regression model	s__Prevotella_nanceiensis	k__Bacteria|p__Bacteroidetes|c__Bacteroidia|o__Bacteroidales|f__Prevotellaceae|g__Prevotella|s__Prevotella_nanceiensis	0.0161903	0.94922	0.00914	0.9105	0.0358289	1
logistic regression model	f__Corynebacteriaceae	k__Bacteria|p__Actinobacteria|c__Actinomycetia|o__Corynebacteriales|f__Corynebacteriaceae	0.00196674	0.948259	0.0026	0.9538	0.000451653	0.914905
logistic regression model	s__Alloprevotella_SGB1484	k__Bacteria|p__Bacteroidetes|c__Bacteroidia|o__Bacteroidales|f__Prevotellaceae|g__Alloprevotella|s__Alloprevotella_SGB1484	0.010047	0.948259	0.00779	0.9003	0.00849457	0.956163
logistic regression model	s__Peptostreptococcus_SGB749	k__Bacteria|p__Firmicutes|c__Clostridia|o__Eubacteriales|f__Peptostreptococcaceae|g__Peptostreptococcus|s__Peptostreptococcus_SGB749	0.00658864	0.948139	0.00428	0.9118	0.00738371	0.993811
logistic regression model	s__Prevotella_intermedia	k__Bacteria|p__Bacteroidetes|c__Bacteroidia|o__Bacteroidales|f__Prevotellaceae|g__Prevotella|s__Prevotella_intermedia	0.00785891	0.946098	0.00925	0.9357	0.00213105	0.882929
logistic regression model	s__Eubacterium_sulci	k__Bacteria|p__Firmicutes|c__Clostridia|o__Eubacteriales|f__Eubacteriales_Family_XIII_Incertae_Sedis|g__Eubacteriales_Family_XIII_Incertae_Sedis_unclassified|s__Eubacterium_sulci	0.0023624	0.945618	0.0017	0.901	0.0031994	0.992264
logistic regression model	s__Actinomyces_sp_ICM47	k__Bacteria|p__Actinobacteria|c__Actinomycetia|o__Actinomycetales|f__Actinomycetaceae|g__Actinomyces|s__Actinomyces_sp_ICM47	0.0097275	0.944298	0.0132	0.9173	0.00974643	0.995358
logistic regression model	s__Alloprevotella_tannerae	k__Bacteria|p__Bacteroidetes|c__Bacteroidia|o__Bacteroidales|f__Prevotellaceae|g__Alloprevotella|s__Alloprevotella_tannerae	0.0025413	0.944058	0.00299	0.9229	0.00135067	0.986075
logistic regression model	s__Prevotella_veroralis	k__Bacteria|p__Bacteroidetes|c__Bacteroidia|o__Bacteroidales|f__Prevotellaceae|g__Prevotella|s__Prevotella_veroralis	0.00261806	0.943577	0.00254	0.9121	0.000514675	0.91181
logistic regression model	s__Actinomyces_graevenitzii	k__Bacteria|p__Actinobacteria|c__Actinomycetia|o__Actinomycetales|f__Actinomycetaceae|g__Actinomyces|s__Actinomyces_graevenitzii	0.0039065	0.943217	0.00582	0.9252	0.00354657	0.976792
logistic regression model	s__Tannerella_forsythia	k__Bacteria|p__Bacteroidetes|c__Bacteroidia|o__Bacteroidales|f__Tannerellaceae|g__Tannerella|s__Tannerella_forsythia	0.0018573	0.943217	0.00316	0.9387	0.000394983	0.935534
logistic regression model	s__Actinomyces_oris	k__Bacteria|p__Actinobacteria|c__Actinomycetia|o__Actinomycetales|f__Actinomycetaceae|g__Actinomyces|s__Actinomyces_oris	0.000757752	0.941297	0.00122	0.9442	0.000311838	0.974214
logistic regression model	s__Alloprevotella_SGB1483	k__Bacteria|p__Bacteroidetes|c__Bacteroidia|o__Bacteroidales|f__Prevotellaceae|g__Alloprevotella|s__Alloprevotella_SGB1483	0.00871134	0.941297	0.00668	0.8964	0.00775951	0.952037
logistic regression model	f__Burkholderiaceae	k__Bacteria|p__Proteobacteria|c__Betaproteobacteria|o__Burkholderiales|f__Burkholderiaceae	0.00257115	0.940336	0.00433	0.9354	0.000872786	0.983497
logistic regression model	s__Streptococcus_parasanguinis	k__Bacteria|p__Firmicutes|c__Bacilli|o__Lactobacillales|f__Streptococcaceae|g__Streptococcus|s__Streptococcus_parasanguinis	0.00807033	0.939496	0.0132	0.9393	0.00418066	0.925219
logistic regression model	g__Filifactor	k__Bacteria|p__Firmicutes|c__Clostridia|o__Eubacteriales|f__Peptostreptococcaceae|g__Filifactor	0.00149448	0.939376	0.00243	0.9236	0.000277044	0.872615
logistic regression model	s__Leptotrichia_sp_oral_taxon_215	k__Bacteria|p__Fusobacteria|c__Fusobacteriia|o__Fusobacteriales|f__Leptotrichiaceae|g__Leptotrichia|s__Leptotrichia_sp_oral_taxon_215	0.0036825	0.939376	0.00391	0.9095	0.00484571	0.98556
logistic regression model	s__Lautropia_mirabilis	k__Bacteria|p__Proteobacteria|c__Betaproteobacteria|o__Burkholderiales|f__Burkholderiaceae|g__Lautropia|s__Lautropia_mirabilis	0.00226504	0.938896	0.00371	0.9337	0.00073037	0.982465
logistic regression model	s__Prevotella_oulorum	k__Bacteria|p__Bacteroidetes|c__Bacteroidia|o__Bacteroidales|f__Prevotellaceae|g__Prevotella|s__Prevotella_oulorum	0.000813122	0.938055	0.000916	0.9023	0.000210446	0.889634
logistic regression model	s__Oribacterium_sinus	k__Bacteria|p__Firmicutes|c__Clostridia|o__Eubacteriales|f__Lachnospiraceae|g__Oribacterium|s__Oribacterium_sinus	0.00104655	0.937335	0.00129	0.9082	0.000985488	0.972151
logistic regression model	g__GGB1202	k__Bacteria|p__Bacteroidetes|c__CFGB570|o__OFGB570|f__FGB570|g__GGB1202	0.00209567	0.937215	0.00189	0.9052	0.00107036	0.902527
logistic regression model	c__Tissierellia	k__Bacteria|p__Firmicutes|c__Tissierellia	0.00131135	0.936134	0.00126	0.8931	0.000972511	0.940175
logistic regression model	p__Tenericutes	k__Bacteria|p__Tenericutes	0.00312978	0.935654	0.00425	0.9085	0.000680694	0.933987
logistic regression model	g__Parvimonas	k__Bacteria|p__Firmicutes|c__Tissierellia|o__Tissierellales|f__Peptoniphilaceae|g__Parvimonas	0.00130534	0.935534	0.00124	0.8914	0.00097207	0.93966
logistic regression model	p__Candidatus_Absconditabacteria	k__Bacteria|p__Candidatus_Absconditabacteria	0.00870621	0.935294	0.0061	0.8872	0.014031	0.955647
logistic regression model	s__Catonella_massiliensis	k__Bacteria|p__Firmicutes|c__Clostridia|o__Eubacteriales|f__Lachnospiraceae|g__Catonella|s__Catonella_massiliensis	0.000766811	0.934934	0.000816	0.8855	0.000904175	0.98556
logistic regression model	s__TM7_phylum_sp_oral_taxon_352	k__Bacteria|p__Candidatus_Saccharibacteria|c__Candidatus_Saccharibacteria_unclassified|o__Candidatus_Saccharibacteria_unclassified|f__Candidatus_Saccharibacteria_unclassified|g__Candidatus_Saccharibacteria_unclassified|s__TM7_phylum_sp_oral_taxon_352	0.00329468	0.933974	0.00332	0.8944	0.00500357	0.988138
logistic regression model	s__Veillonella_dispar	k__Bacteria|p__Firmicutes|c__Negativicutes|o__Veillonellales|f__Veillonellaceae|g__Veillonella|s__Veillonella_dispar	0.0237412	0.933974	0.0252	0.9046	0.0185819	0.998453
logistic regression model	g__GGB4538	k__Bacteria|p__Firmicutes|c__CFGB1764|o__OFGB1764|f__FGB1764|g__GGB4538	0.00142175	0.932053	0.00142	0.8819	0.000717224	0.935018
logistic regression model	s__Prevotella_denticola	k__Bacteria|p__Bacteroidetes|c__Bacteroidia|o__Bacteroidales|f__Prevotellaceae|g__Prevotella|s__Prevotella_denticola	0.00206415	0.930972	0.00257	0.9032	0.00034258	0.858174
logistic regression model	g__GGB1203	k__Bacteria|p__Bacteroidetes|c__CFGB570|o__OFGB570|f__FGB570|g__GGB1203	0.00364197	0.930132	0.00224	0.8741	0.00454313	0.982981
logistic regression model	f__Bacteroidetes_unclassified	k__Bacteria|p__Bacteroidetes|c__Bacteroidetes_unclassified|o__Bacteroidetes_unclassified|f__Bacteroidetes_unclassified	0.000873638	0.929652	0.00127	0.9098	0.000470873	0.956679
logistic regression model	g__Lachnospiraceae_unclassified	k__Bacteria|p__Firmicutes|c__Clostridia|o__Eubacteriales|f__Lachnospiraceae|g__Lachnospiraceae_unclassified	0.0017485	0.927971	0.00252	0.9187	0.00126401	0.91542
logistic regression model	c__Candidatus_Saccharimonia	k__Bacteria|p__Candidatus_Saccharibacteria|c__Candidatus_Saccharimonia	0.000433256	0.927371	0.000642	0.9042	7.43909e-05	0.846828
logistic regression model	s__GGB1144_SGB1469	k__Bacteria|p__Bacteroidetes|c__Bacteroidia|o__Bacteroidales|f__Prevotellaceae|g__GGB1144|s__GGB1144_SGB1469	0.0149295	0.927251	0.00851	0.8436	0.033018	0.998453
logistic regression model	s__Campylobacter_rectus	k__Bacteria|p__Proteobacteria|c__Epsilonproteobacteria|o__Campylobacterales|f__Campylobacteraceae|g__Campylobacter|s__Campylobacter_rectus	0.00133006	0.92473	0.00208	0.9114	0.000299796	0.90098
logistic regression model	s__Granulicatella_adiacens	k__Bacteria|p__Firmicutes|c__Bacilli|o__Lactobacillales|f__Carnobacteriaceae|g__Granulicatella|s__Granulicatella_adiacens	0.000306845	0.92449	0.000321	0.8596	0.000183882	0.942754
logistic regression model	s__GGB1843_SGB2524	k__Bacteria|p__Bacteroidetes|c__Flavobacteriia|o__Flavobacteriales|f__Weeksellaceae|g__GGB1843|s__GGB1843_SGB2524	0.00118015	0.920648	0.00139	0.8764	0.00184915	0.992264
logistic regression model	s__Actinomyces_SGB17132	k__Bacteria|p__Actinobacteria|c__Actinomycetia|o__Actinomycetales|f__Actinomycetaceae|g__Actinomyces|s__Actinomyces_SGB17132	0.00056324	0.919568	0.000504	0.8481	0.000960291	0.986591
logistic regression model	s__Haemophilus_haemolyticus	k__Bacteria|p__Proteobacteria|c__Gammaproteobacteria|o__Pasteurellales|f__Pasteurellaceae|g__Haemophilus|s__Haemophilus_haemolyticus	0.0027953	0.919448	0.00239	0.8806	0.00370608	0.975761
logistic regression model	s__Megasphaera_micronuciformis	k__Bacteria|p__Firmicutes|c__Negativicutes|o__Veillonellales|f__Veillonellaceae|g__Megasphaera|s__Megasphaera_micronuciformis	0.00438804	0.913685	0.00427	0.8718	0.0033479	0.832904
logistic regression model	s__Corynebacterium_matruchotii	k__Bacteria|p__Actinobacteria|c__Actinomycetia|o__Corynebacteriales|f__Corynebacteriaceae|g__Corynebacterium|s__Corynebacterium_matruchotii	0.000872736	0.912245	0.00152	0.9328	0.000102994	0.646725
logistic regression model	s__Streptococcus_oralis	k__Bacteria|p__Firmicutes|c__Bacilli|o__Lactobacillales|f__Streptococcaceae|g__Streptococcus|s__Streptococcus_oralis	0.000621042	0.911885	0.000785	0.8721	0.000692351	0.978855
logistic regression model	s__GGB1202_SGB1566	k__Bacteria|p__Bacteroidetes|c__CFGB570|o__OFGB570|f__FGB570|g__GGB1202|s__GGB1202_SGB1566	0.00058507	0.910084	0.000707	0.8609	0.000123207	0.86952
logistic regression model	c__Mollicutes	k__Bacteria|p__Tenericutes|c__Mollicutes	0.00215017	0.907323	0.00318	0.8698	0.000386667	0.899433
logistic regression model	s__Streptococcus_sanguinis	k__Bacteria|p__Firmicutes|c__Bacilli|o__Lactobacillales|f__Streptococcaceae|g__Streptococcus|s__Streptococcus_sanguinis	0.000482914	0.905402	0.000843	0.8931	0.000283939	0.991233
logistic regression model	s__Capnocytophaga_sputigena	k__Bacteria|p__Bacteroidetes|c__Flavobacteriia|o__Flavobacteriales|f__Flavobacteriaceae|g__Capnocytophaga|s__Capnocytophaga_sputigena	0.000609422	0.9012	0.000699	0.8436	0.000388893	0.980402
logistic regression model	s__Candidatus_Nanosynsacchari_sp_TM7_ANC_38_39_G1_1	k__Bacteria|p__Candidatus_Saccharibacteria|c__Candidatus_Saccharimonia|o__Candidatus_Saccharimonales|f__Candidatus_Sacchiramonaceae|g__Candidatus_Nanosynsacchari|s__Candidatus_Nanosynsacchari_sp_TM7_ANC_38_39_G1_1	0.000361385	0.90084	0.000558	0.8872	6.53302e-05	0.808664
logistic regression model	s__Solobacterium_SGB6829	k__Bacteria|p__Firmicutes|c__Erysipelotrichia|o__Erysipelotrichales|f__Erysipelotrichaceae|g__Solobacterium|s__Solobacterium_SGB6829	0.000494895	0.898559	0.000435	0.8098	0.000579395	0.931924
logistic regression model	s__GGB10485_SGB49305	k__Bacteria|p__Firmicutes|c__Bacilli|o__Lactobacillales|f__Enterococcaceae|g__GGB10485|s__GGB10485_SGB49305	0.00160985	0.896999	0.00274	0.9124	0.000169412	0.777205
logistic regression model	s__Prevotella_conceptionensis	k__Bacteria|p__Bacteroidetes|c__Bacteroidia|o__Bacteroidales|f__Prevotellaceae|g__Prevotella|s__Prevotella_conceptionensis	0.000501315	0.896879	0.000792	0.8695	0.000116519	0.817947
logistic regression model	c__Candidatus_Nanosyncoccalia	k__Bacteria|p__Candidatus_Saccharibacteria|c__Candidatus_Nanosyncoccalia	0.00116719	0.893517	0.00132	0.8262	0.00207246	0.966993
logistic regression model	s__Prevotella_buccae	k__Bacteria|p__Bacteroidetes|c__Bacteroidia|o__Bacteroidales|f__Prevotellaceae|g__Prevotella|s__Prevotella_buccae	0.000452257	0.890036	0.000459	0.8006	6.94788e-05	0.726147
logistic regression model	g__GGB4937	k__Bacteria|p__Candidatus_Absconditabacteria|c__Candidatus_Absconditabacteria_unclassified|o__Candidatus_Absconditabacteria_unclassified|f__Candidatus_Absconditabacteria_unclassified|g__GGB4937	0.00110622	0.887275	0.00109	0.8281	0.000923468	0.888602
logistic regression model	s__Prevotella_maculosa	k__Bacteria|p__Bacteroidetes|c__Bacteroidia|o__Bacteroidales|f__Prevotellaceae|g__Prevotella|s__Prevotella_maculosa	0.00021898	0.885954	0.000263	0.8216	6.2241e-05	0.80557
logistic regression model	s__Prevotella_baroniae	k__Bacteria|p__Bacteroidetes|c__Bacteroidia|o__Bacteroidales|f__Prevotellaceae|g__Prevotella|s__Prevotella_baroniae	0.0004252	0.885114	0.000465	0.8432	6.70496e-05	0.697267
logistic regression model	c__Candidatus_Nanoperiomorbia	k__Bacteria|p__Candidatus_Saccharibacteria|c__Candidatus_Nanoperiomorbia	0.000411133	0.882113	0.000682	0.8718	6.97934e-05	0.781846
logistic regression model	s__Streptococcus_gordonii	k__Bacteria|p__Firmicutes|c__Bacilli|o__Lactobacillales|f__Streptococcaceae|g__Streptococcus|s__Streptococcus_gordonii	0.000670163	0.880672	0.000981	0.8557	6.70315e-05	0.645178
logistic regression model	s__Campylobacter_SGB19337	k__Bacteria|p__Proteobacteria|c__Epsilonproteobacteria|o__Campylobacterales|f__Campylobacteraceae|g__Campylobacter|s__Campylobacter_SGB19337	0.000215443	0.880192	0.00024	0.7911	8.06179e-05	0.941207
logistic regression model	s__Porphyromonas_gingivalis	k__Bacteria|p__Bacteroidetes|c__Bacteroidia|o__Bacteroidales|f__Porphyromonadaceae|g__Porphyromonas|s__Porphyromonas_gingivalis	0.00908385	0.879712	0.0145	0.8852	0.00138757	0.692625
logistic regression model	s__Porphyromonas_sp_oral_taxon_278	k__Bacteria|p__Bacteroidetes|c__Bacteroidia|o__Bacteroidales|f__Porphyromonadaceae|g__Porphyromonas|s__Porphyromonas_sp_oral_taxon_278	0.00178518	0.877911	0.00192	0.834	0.000322531	0.871583
logistic regression model	s__Gemella_morbillorum	k__Bacteria|p__Firmicutes|c__Bacilli|o__Bacillales|f__Bacillales_unclassified|g__Gemella|s__Gemella_morbillorum	0.000245286	0.87587	0.000281	0.8127	0.000106855	0.902527
logistic regression model	s__Leptotrichia_buccalis	k__Bacteria|p__Fusobacteria|c__Fusobacteriia|o__Fusobacteriales|f__Leptotrichiaceae|g__Leptotrichia|s__Leptotrichia_buccalis	0.000299629	0.87515	0.000505	0.858	4.04658e-05	0.661166
logistic regression model	s__Oribacterium_asaccharolyticum	k__Bacteria|p__Firmicutes|c__Clostridia|o__Eubacteriales|f__Lachnospiraceae|g__Oribacterium|s__Oribacterium_asaccharolyticum	0.000376158	0.87479	0.00041	0.7996	0.000415957	0.929345
logistic regression model	s__Leptotrichia_sp_oral_taxon_221	k__Bacteria|p__Fusobacteria|c__Fusobacteriia|o__Fusobacteriales|f__Leptotrichiaceae|g__Leptotrichia|s__Leptotrichia_sp_oral_taxon_221	0.00233611	0.872029	0.0029	0.8137	0.00138502	0.862816
logistic regression model	g__Kingella	k__Bacteria|p__Proteobacteria|c__Betaproteobacteria|o__Neisseriales|f__Neisseriaceae|g__Kingella	0.00083239	0.871068	0.000924	0.8249	0.000448782	0.940175
logistic regression model	s__Selenomonas_sputigena	k__Bacteria|p__Firmicutes|c__Negativicutes|o__Selenomonadales|f__Selenomonadaceae|g__Selenomonas|s__Selenomonas_sputigena	0.000352258	0.869748	0.00044	0.8055	9.14582e-05	0.699845
logistic regression model	s__Aggregatibacter_segnis	k__Bacteria|p__Proteobacteria|c__Gammaproteobacteria|o__Pasteurellales|f__Pasteurellaceae|g__Aggregatibacter|s__Aggregatibacter_segnis	0.00222731	0.867227	0.00235	0.8193	0.000884633	0.899433
logistic regression model	s__Treponema_denticola	k__Bacteria|p__Spirochaetes|c__Spirochaetia|o__Spirochaetales|f__Treponemataceae|g__Treponema|s__Treponema_denticola	0.000329202	0.867107	0.000567	0.8652	6.16794e-05	0.715317
logistic regression model	s__Lachnoanaerobaculum_sp_ICM7	k__Bacteria|p__Firmicutes|c__Clostridia|o__Eubacteriales|f__Lachnospiraceae|g__Lachnoanaerobaculum|s__Lachnoanaerobaculum_sp_ICM7	0.000638456	0.866507	0.000701	0.8081	0.0011026	0.982981
logistic regression model	s__Selenomonas_SGB5880	k__Bacteria|p__Firmicutes|c__Negativicutes|o__Selenomonadales|f__Selenomonadaceae|g__Selenomonas|s__Selenomonas_SGB5880	0.00129785	0.864586	0.00132	0.7776	0.00156318	0.963899
logistic regression model	s__Actinomyces_sp_ph3	k__Bacteria|p__Actinobacteria|c__Actinomycetia|o__Actinomycetales|f__Actinomycetaceae|g__Actinomyces|s__Actinomyces_sp_ph3	0.000968401	0.861585	0.00108	0.8137	0.00123038	0.922641
logistic regression model	s__Prevotella_koreensis	k__Bacteria|p__Bacteroidetes|c__Bacteroidia|o__Bacteroidales|f__Prevotellaceae|g__Prevotella|s__Prevotella_koreensis	0.00116157	0.860384	0.0017	0.8416	0.000192591	0.654977
logistic regression model	s__Parvimonas_micra	k__Bacteria|p__Firmicutes|c__Tissierellia|o__Tissierellales|f__Peptoniphilaceae|g__Parvimonas|s__Parvimonas_micra	0.000410606	0.857863	0.000477	0.7796	9.27071e-05	0.801444
logistic regression model	s__Stomatobaculum_SGB5266	k__Bacteria|p__Firmicutes|c__Clostridia|o__Eubacteriales|f__Lachnospiraceae|g__Stomatobaculum|s__Stomatobaculum_SGB5266	0.00114448	0.853661	0.00146	0.8101	0.000677181	0.896854
logistic regression model	s__Bacteroidetes_oral_taxon_274	k__Bacteria|p__Bacteroidetes|c__Bacteroidetes_unclassified|o__Bacteroidetes_unclassified|f__Bacteroidetes_unclassified|g__Bacteroidetes_unclassified|s__Bacteroidetes_oral_taxon_274	0.000505341	0.852941	0.000822	0.8331	0.000238152	0.931408
logistic regression model	s__Actinomyces_SGB17163	k__Bacteria|p__Actinobacteria|c__Actinomycetia|o__Actinomycetales|f__Actinomycetaceae|g__Actinomyces|s__Actinomyces_SGB17163	0.000824187	0.852821	0.000904	0.797	0.000473115	0.957194
logistic regression model	s__Prevotella_loescheii	k__Bacteria|p__Bacteroidetes|c__Bacteroidia|o__Bacteroidales|f__Prevotellaceae|g__Prevotella|s__Prevotella_loescheii	0.000340506	0.84886	0.000443	0.7993	0.000132752	0.843734
logistic regression model	s__Lachnoanaerobaculum_orale	k__Bacteria|p__Firmicutes|c__Clostridia|o__Eubacteriales|f__Lachnospiraceae|g__Lachnoanaerobaculum|s__Lachnoanaerobaculum_orale	0.000832516	0.847539	0.00112	0.8016	0.000706444	0.815884
logistic regression model	g__GGB4533	k__Bacteria|p__Firmicutes|c__CFGB1762|o__OFGB1762|f__FGB1762|g__GGB4533	0.000522536	0.847299	0.000664	0.8019	8.39865e-05	0.617329
logistic regression model	s__GGB1843_SGB2516	k__Bacteria|p__Bacteroidetes|c__Flavobacteriia|o__Flavobacteriales|f__Weeksellaceae|g__GGB1843|s__GGB1843_SGB2516	0.000183232	0.844298	0.000232	0.7707	0.00013502	0.966993
logistic regression model	s__GGB74353_SGB98242	k__Bacteria|p__Bacteroidetes|c__Bacteroidia|o__Bacteroidales|f__Prevotellaceae|g__GGB74353|s__GGB74353_SGB98242	0.000319157	0.840816	0.000244	0.7534	0.000246947	0.872099
logistic regression model	s__Leptotrichia_SGB6069	k__Bacteria|p__Fusobacteria|c__Fusobacteriia|o__Fusobacteriales|f__Leptotrichiaceae|g__Leptotrichia|s__Leptotrichia_SGB6069	0.000194778	0.837095	0.000272	0.7875	8.19602e-05	0.895307
logistic regression model	s__Capnocytophaga_SGB2480	k__Bacteria|p__Bacteroidetes|c__Flavobacteriia|o__Flavobacteriales|f__Flavobacteriaceae|g__Capnocytophaga|s__Capnocytophaga_SGB2480	0.000465783	0.835534	0.000553	0.7721	0.000174342	0.814853
logistic regression model	g__GGB2666	k__Bacteria|p__Spirochaetes|c__Spirochaetia|o__Spirochaetales|f__Treponemataceae|g__GGB2666	0.000699637	0.834454	0.00101	0.795	0.000170677	0.711191
logistic regression model	s__Leptotrichia_hongkongensis	k__Bacteria|p__Fusobacteria|c__Fusobacteriia|o__Fusobacteriales|f__Leptotrichiaceae|g__Leptotrichia|s__Leptotrichia_hongkongensis	0.000227066	0.833253	0.000318	0.7602	6.43167e-05	0.826199
logistic regression model	s__Gemella_SGB47116	k__Bacteria|p__Firmicutes|c__Bacilli|o__Bacillales|f__Bacillales_unclassified|g__Gemella|s__Gemella_SGB47116	0.000225508	0.829772	0.000284	0.7717	4.34575e-05	0.782878
logistic regression model	s__Bacteroidetes_unclassified_SGB1343	k__Bacteria|p__Bacteroidetes|c__Bacteroidetes_unclassified|o__Bacteroidetes_unclassified|f__Bacteroidetes_unclassified|g__Bacteroidetes_unclassified|s__Bacteroidetes_unclassified_SGB1343	0.000368297	0.82605	0.000448	0.7885	0.000224874	0.705003
logistic regression model	g__Cardiobacterium	k__Bacteria|p__Proteobacteria|c__Gammaproteobacteria|o__Cardiobacteriales|f__Cardiobacteriaceae|g__Cardiobacterium	0.000196583	0.82557	0.000298	0.7766	9.93994e-05	0.903559
logistic regression model	f__Bacteroidaceae	k__Bacteria|p__Bacteroidetes|c__Bacteroidia|o__Bacteroidales|f__Bacteroidaceae	0.000387453	0.82461	0.000552	0.8009	0.000399494	0.472408
logistic regression model	f__Candidatus_Nanogingivalaceae	k__Bacteria|p__Candidatus_Saccharibacteria|c__Candidatus_Nanosyncoccalia|o__Candidatus_Nanogingivales|f__Candidatus_Nanogingivalaceae	0.000870058	0.823649	0.00108	0.754	0.00144712	0.911294
logistic regression model	s__Dialister_pneumosintes	k__Bacteria|p__Firmicutes|c__Negativicutes|o__Veillonellales|f__Veillonellaceae|g__Dialister|s__Dialister_pneumosintes	0.000304759	0.823649	0.000289	0.7314	7.57134e-05	0.706034
logistic regression model	g__Candidatus_Absconditabacteria_unclassified	k__Bacteria|p__Candidatus_Absconditabacteria|c__Candidatus_Absconditabacteria_unclassified|o__Candidatus_Absconditabacteria_unclassified|f__Candidatus_Absconditabacteria_unclassified|g__Candidatus_Absconditabacteria_unclassified	0.00339471	0.822209	0.00239	0.7491	0.00431716	0.867973
logistic regression model	s__Eubacterium_nodatum	k__Bacteria|p__Firmicutes|c__Clostridia|o__Eubacteriales|f__Eubacteriales_Family_XIII_Incertae_Sedis|g__Eubacteriales_Family_XIII_Incertae_Sedis_unclassified|s__Eubacterium_nodatum	0.000425171	0.821729	0.000666	0.8052	0.000101588	0.673543
logistic regression model	s__Gemella_haemolysans	k__Bacteria|p__Firmicutes|c__Bacilli|o__Bacillales|f__Bacillales_unclassified|g__Gemella|s__Gemella_haemolysans	0.000231725	0.821008	0.000294	0.7412	0.000129334	0.828262
logistic regression model	s__Prevotella_SGB1459	k__Bacteria|p__Bacteroidetes|c__Bacteroidia|o__Bacteroidales|f__Prevotellaceae|g__Prevotella|s__Prevotella_SGB1459	0.000666667	0.816687	0.000993	0.7839	0.000251878	0.917483
logistic regression model	s__Veillonella_tobetsuensis	k__Bacteria|p__Firmicutes|c__Negativicutes|o__Veillonellales|f__Veillonellaceae|g__Veillonella|s__Veillonella_tobetsuensis	0.00711611	0.816327	0.00608	0.7553	0.00953071	0.959257
logistic regression model	g__Eikenella	k__Bacteria|p__Proteobacteria|c__Betaproteobacteria|o__Neisseriales|f__Neisseriaceae|g__Eikenella	0.000229082	0.815486	0.000298	0.7461	7.36899e-05	0.755544
logistic regression model	s__Streptococcus_australis	k__Bacteria|p__Firmicutes|c__Bacilli|o__Lactobacillales|f__Streptococcaceae|g__Streptococcus|s__Streptococcus_australis	0.000828105	0.811525	0.0014	0.7747	0.00251105	0.989685
logistic regression model	s__TM7_phylum_sp_oral_taxon_351	k__Bacteria|p__Candidatus_Saccharibacteria|c__Candidatus_Saccharibacteria_unclassified|o__Candidatus_Saccharibacteria_unclassified|f__Candidatus_Saccharibacteria_unclassified|g__Candidatus_Saccharibacteria_unclassified|s__TM7_phylum_sp_oral_taxon_351	0.000840938	0.809724	0.000824	0.7399	0.00043817	0.781846
logistic regression model	s__Actinomyces_SGB17168	k__Bacteria|p__Actinobacteria|c__Actinomycetia|o__Actinomycetales|f__Actinomycetaceae|g__Actinomyces|s__Actinomyces_SGB17168	0.00265354	0.809484	0.00327	0.7639	0.00179041	0.896854
logistic regression model	s__Prevotella_SGB98243	k__Bacteria|p__Bacteroidetes|c__Bacteroidia|o__Bacteroidales|f__Prevotellaceae|g__Prevotella|s__Prevotella_SGB98243	0.000921586	0.806122	0.000925	0.7609	0.000572369	0.762249
logistic regression model	s__Alloprevotella_sp_Lung230	k__Bacteria|p__Bacteroidetes|c__Bacteroidia|o__Bacteroidales|f__Prevotellaceae|g__Alloprevotella|s__Alloprevotella_sp_Lung230	0.000956756	0.805522	0.000828	0.7281	0.000758367	0.892728
logistic regression model	s__Neisseria_sp_oral_taxon_014	k__Bacteria|p__Proteobacteria|c__Betaproteobacteria|o__Neisseriales|f__Neisseriaceae|g__Neisseria|s__Neisseria_sp_oral_taxon_014	0.00348028	0.805042	0.00608	0.7789	0.000443503	0.846828
logistic regression model	f__FGB494	k__Bacteria|p__Bacteroidetes|c__CFGB494|o__OFGB494|f__FGB494	0.00079646	0.804442	0.00157	0.7898	0.000200683	0.750387
logistic regression model	s__Rothia_aeria	k__Bacteria|p__Actinobacteria|c__Actinomycetia|o__Micrococcales|f__Micrococcaceae|g__Rothia|s__Rothia_aeria	0.000235811	0.802761	0.000456	0.7927	0.00011499	0.909232
logistic regression model	s__Alloprevotella_sp_oral_taxon_473	k__Bacteria|p__Bacteroidetes|c__Bacteroidia|o__Bacteroidales|f__Prevotellaceae|g__Alloprevotella|s__Alloprevotella_sp_oral_taxon_473	0.00241238	0.79976	0.00167	0.7494	0.00123362	0.786488
logistic regression model	g__GGB12785	k__Bacteria|p__Candidatus_Saccharibacteria|c__Candidatus_Nanosyncoccalia|o__Candidatus_Nanogingivales|f__Candidatus_Nanogingivalaceae|g__GGB12785	0.00079353	0.79916	0.000994	0.7219	0.00129809	0.898917
logistic regression model	s__Capnocytophaga_bilenii	k__Bacteria|p__Bacteroidetes|c__Flavobacteriia|o__Flavobacteriales|f__Flavobacteriaceae|g__Capnocytophaga|s__Capnocytophaga_bilenii	0.000664203	0.796639	0.00074	0.735	0.000219752	0.646725
logistic regression model	s__Prevotella_vespertina	k__Bacteria|p__Bacteroidetes|c__Bacteroidia|o__Bacteroidales|f__Prevotellaceae|g__Prevotella|s__Prevotella_vespertina	0.0141106	0.795558	0.0131	0.7314	0.0104728	0.817947
logistic regression model	s__Lachnospiraceae_bacterium_oral_taxon_500	k__Bacteria|p__Firmicutes|c__Clostridia|o__Eubacteriales|f__Lachnospiraceae|g__Lachnospiraceae_unclassified|s__Lachnospiraceae_bacterium_oral_taxon_500	0.000244909	0.793878	0.000425	0.7845	4.60172e-05	0.6328
logistic regression model	s__Treponema_vincentii	k__Bacteria|p__Spirochaetes|c__Spirochaetia|o__Spirochaetales|f__Treponemataceae|g__Treponema|s__Treponema_vincentii	0.000162409	0.791717	0.000229	0.7078	4.24239e-05	0.717896
logistic regression model	s__GGB12441_SGB19290	k__Bacteria|p__Proteobacteria|c__CFGB4196|o__OFGB4196|f__FGB4196|g__GGB12441|s__GGB12441_SGB19290	0.00124852	0.787635	0.00151	0.7461	0.000822358	0.807633
logistic regression model	g__Ottowia	k__Bacteria|p__Proteobacteria|c__Betaproteobacteria|o__Burkholderiales|f__Comamonadaceae|g__Ottowia	0.000488285	0.787395	0.000627	0.7399	0.000111939	0.711707
logistic regression model	s__Alloprevotella_SGB1410	k__Bacteria|p__Bacteroidetes|c__Bacteroidia|o__Bacteroidales|f__Prevotellaceae|g__Alloprevotella|s__Alloprevotella_SGB1410	0.00446543	0.784394	0.0027	0.712	0.00684975	0.904074
logistic regression model	s__Mogibacterium_timidum	k__Bacteria|p__Firmicutes|c__Clostridia|o__Eubacteriales|f__Eubacteriales_Family_XIII_Incertae_Sedis|g__Mogibacterium|s__Mogibacterium_timidum	0.000193934	0.783794	0.000266	0.7186	5.69439e-05	0.700877
logistic regression model	f__FGB4967	k__Bacteria|p__Firmicutes|c__CFGB4967|o__OFGB4967|f__FGB4967	0.000690746	0.783433	0.0011	0.752	0.000123191	0.620939
logistic regression model	s__Prevotella_histicola	k__Bacteria|p__Bacteroidetes|c__Bacteroidia|o__Bacteroidales|f__Prevotellaceae|g__Prevotella|s__Prevotella_histicola	0.0294459	0.782833	0.0287	0.7543	0.0302138	0.906653
logistic regression model	g__GGB4333	k__Bacteria|p__Tenericutes|c__Mollicutes|o__Mycoplasmatales|f__Mycoplasmataceae|g__GGB4333	0.00191638	0.782473	0.00295	0.7484	0.000235341	0.672512
logistic regression model	s__Selenomonas_noxia	k__Bacteria|p__Firmicutes|c__Negativicutes|o__Selenomonadales|f__Selenomonadaceae|g__Selenomonas|s__Selenomonas_noxia	0.00022766	0.780432	0.000339	0.7625	3.59713e-05	0.574523
logistic regression model	s__Kingella_denitrificans	k__Bacteria|p__Proteobacteria|c__Betaproteobacteria|o__Neisseriales|f__Neisseriaceae|g__Kingella|s__Kingella_denitrificans	0.000681143	0.778151	0.000701	0.7186	0.000328123	0.772563
logistic regression model	s__Lachnospiraceae_bacterium_oral_taxon_096	k__Bacteria|p__Firmicutes|c__Clostridia|o__Eubacteriales|f__Lachnospiraceae|g__Lachnospiraceae_unclassified|s__Lachnospiraceae_bacterium_oral_taxon_096	0.00150324	0.776831	0.00209	0.7409	0.00117368	0.787004
logistic regression model	s__Capnocytophaga_genosp_AHN8471	k__Bacteria|p__Bacteroidetes|c__Flavobacteriia|o__Flavobacteriales|f__Flavobacteriaceae|g__Capnocytophaga|s__Capnocytophaga_genosp_AHN8471	0.000166002	0.776591	0.00024	0.6983	7.80477e-05	0.888602
logistic regression model	s__Leptotrichia_sp_oral_taxon_498	k__Bacteria|p__Fusobacteria|c__Fusobacteriia|o__Fusobacteriales|f__Leptotrichiaceae|g__Leptotrichia|s__Leptotrichia_sp_oral_taxon_498	0.000258865	0.77503	0.000367	0.7261	1.80076e-05	0.37803
logistic regression model	s__GGB49504_SGB69447	k__Bacteria|p__Spirochaetes|c__Spirochaetia|o__Spirochaetales|f__Treponemataceae|g__GGB49504|s__GGB49504_SGB69447	0.000268229	0.77443	0.000408	0.7573	4.30524e-05	0.552862
logistic regression model	s__Eggerthia_catenaformis	k__Bacteria|p__Firmicutes|c__Erysipelotrichia|o__Erysipelotrichales|f__Coprobacillaceae|g__Eggerthia|s__Eggerthia_catenaformis	0.000625932	0.772269	0.000905	0.7206	7.84748e-05	0.500258
logistic regression model	s__GGB4538_SGB6256	k__Bacteria|p__Firmicutes|c__CFGB1764|o__OFGB1764|f__FGB1764|g__GGB4538|s__GGB4538_SGB6256	0.000826793	0.769988	0.000862	0.6973	0.000236868	0.60392
logistic regression model	s__Prevotella_shahii	k__Bacteria|p__Bacteroidetes|c__Bacteroidia|o__Bacteroidales|f__Prevotellaceae|g__Prevotella|s__Prevotella_shahii	0.00305053	0.768427	0.0028	0.7061	0.00559071	0.941207
logistic regression model	s__Corynebacterium_durum	k__Bacteria|p__Actinobacteria|c__Actinomycetia|o__Corynebacteriales|f__Corynebacteriaceae|g__Corynebacterium|s__Corynebacterium_durum	0.000249417	0.764946	0.000393	0.7127	0.000165416	0.875709
logistic regression model	s__Lancefieldella_rimae	k__Bacteria|p__Actinobacteria|c__Coriobacteriia|o__Coriobacteriales|f__Atopobiaceae|g__Lancefieldella|s__Lancefieldella_rimae	0.000267956	0.764946	0.000301	0.6563	5.72389e-05	0.752965
logistic regression model	s__Hallella_seregens	k__Bacteria|p__Bacteroidetes|c__Bacteroidia|o__Bacteroidales|f__Prevotellaceae|g__Hallella|s__Hallella_seregens	0.000186543	0.762545	0.000248	0.7006	3.38656e-05	0.521919
logistic regression model	s__Leptotrichia_hofstadii	k__Bacteria|p__Fusobacteria|c__Fusobacteriia|o__Fusobacteriales|f__Leptotrichiaceae|g__Leptotrichia|s__Leptotrichia_hofstadii	0.000167901	0.761465	0.000252	0.7137	4.97607e-05	0.695204
logistic regression model	o__OFGB497	k__Bacteria|p__Bacteroidetes|c__CFGB497|o__OFGB497	0.000530516	0.760144	0.000546	0.6914	0.000874208	0.905106
logistic regression model	g__GGB1022	k__Bacteria|p__Bacteroidetes|c__CFGB494|o__OFGB494|f__FGB494|g__GGB1022	0.000412785	0.757983	0.000807	0.7311	0.000128195	0.696751
logistic regression model	s__Prevotella_marshii	k__Bacteria|p__Bacteroidetes|c__Bacteroidia|o__Bacteroidales|f__Prevotellaceae|g__Prevotella|s__Prevotella_marshii	0.000100402	0.757743	0.00013	0.6746	2.02194e-05	0.577617
logistic regression model	s__Actinomyces_dentalis	k__Bacteria|p__Actinobacteria|c__Actinomycetia|o__Actinomycetales|f__Actinomycetaceae|g__Actinomyces|s__Actinomyces_dentalis	0.000193996	0.756423	0.000329	0.7908	2.6233e-05	0.499742
logistic regression model	f__FGB47554	k__Bacteria|p__Bacteroidetes|c__CFGB47554|o__OFGB47554|f__FGB47554	0.000151998	0.754982	0.000228	0.7222	2.81993e-05	0.553894
logistic regression model	s__Leptotrichia_massiliensis	k__Bacteria|p__Fusobacteria|c__Fusobacteriia|o__Fusobacteriales|f__Leptotrichiaceae|g__Leptotrichia|s__Leptotrichia_massiliensis	0.000186747	0.752941	0.000271	0.7242	4.15868e-05	0.6787
logistic regression model	s__Prevotella_multiformis	k__Bacteria|p__Bacteroidetes|c__Bacteroidia|o__Bacteroidales|f__Prevotellaceae|g__Prevotella|s__Prevotella_multiformis	0.00147298	0.751621	0.00184	0.7176	0.000187583	0.447138
logistic regression model	g__GGB1188	k__Bacteria|p__Bacteroidetes|c__CFGB72586|o__OFGB72586|f__FGB72586|g__GGB1188	0.00312368	0.75102	0.00426	0.7379	0.00049676	0.547705
logistic regression model	s__Streptococcus_anginosus	k__Bacteria|p__Firmicutes|c__Bacilli|o__Lactobacillales|f__Streptococcaceae|g__Streptococcus|s__Streptococcus_anginosus	0.000252018	0.75066	0.000388	0.7107	2.68711e-05	0.407942
logistic regression model	s__GGB4538_SGB6253	k__Bacteria|p__Firmicutes|c__CFGB1764|o__OFGB1764|f__FGB1764|g__GGB4538|s__GGB4538_SGB6253	0.000594958	0.75006	0.000555	0.6753	0.000480354	0.850954
logistic regression model	s__Tannerella_sp_oral_taxon_808	k__Bacteria|p__Bacteroidetes|c__Bacteroidia|o__Bacteroidales|f__Tannerellaceae|g__Tannerella|s__Tannerella_sp_oral_taxon_808	8.40689e-05	0.747419	0.000117	0.6517	2.84113e-05	0.799897
logistic regression model	s__Prevotella_saccharolytica	k__Bacteria|p__Bacteroidetes|c__Bacteroidia|o__Bacteroidales|f__Prevotellaceae|g__Prevotella|s__Prevotella_saccharolytica	8.91887e-05	0.746699	0.000108	0.6327	2.33919e-05	0.631769
logistic regression model	g__Olsenella	k__Bacteria|p__Actinobacteria|c__Coriobacteriia|o__Coriobacteriales|f__Atopobiaceae|g__Olsenella	0.000188668	0.743577	0.000258	0.6855	2.7854e-05	0.532749
logistic regression model	o__Candidatus_Gracilibacteria_unclassified	k__Bacteria|p__Candidatus_Gracilibacteria|c__Candidatus_Gracilibacteria_unclassified|o__Candidatus_Gracilibacteria_unclassified	0.000746743	0.739616	0.000665	0.652	0.000643938	0.68231
logistic regression model	s__Oribacterium_parvum	k__Bacteria|p__Firmicutes|c__Clostridia|o__Eubacteriales|f__Lachnospiraceae|g__Oribacterium|s__Oribacterium_parvum	0.000343298	0.736855	0.000393	0.6579	0.00067341	0.944817
logistic regression model	s__GGB1022_SGB1315	k__Bacteria|p__Bacteroidetes|c__CFGB494|o__OFGB494|f__FGB494|g__GGB1022|s__GGB1022_SGB1315	0.000392683	0.733373	0.000754	0.7058	0.000121511	0.682826
logistic regression model	s__Eubacterium_brachy	k__Bacteria|p__Firmicutes|c__Clostridia|o__Eubacteriales|f__Eubacteriales_Family_XIII_Incertae_Sedis|g__Eubacteriales_Family_XIII_Incertae_Sedis_unclassified|s__Eubacterium_brachy	0.00037734	0.733253	0.000543	0.6983	0.000116881	0.775142
logistic regression model	s__Cardiobacterium_hominis	k__Bacteria|p__Proteobacteria|c__Gammaproteobacteria|o__Cardiobacteriales|f__Cardiobacteriaceae|g__Cardiobacterium|s__Cardiobacterium_hominis	0.000109161	0.732533	0.00016	0.6743	7.95367e-05	0.879319
logistic regression model	s__Anaeroglobus_geminatus	k__Bacteria|p__Firmicutes|c__Negativicutes|o__Veillonellales|f__Veillonellaceae|g__Anaeroglobus|s__Anaeroglobus_geminatus	0.00022454	0.732053	0.000306	0.6615	2.29751e-05	0.481692
logistic regression model	s__Capnocytophaga_sp_oral_taxon_863	k__Bacteria|p__Bacteroidetes|c__Flavobacteriia|o__Flavobacteriales|f__Flavobacteriaceae|g__Capnocytophaga|s__Capnocytophaga_sp_oral_taxon_863	0.000450488	0.731813	0.000494	0.6786	7.03753e-05	0.566271
logistic regression model	g__GGB6813	k__Bacteria|p__Proteobacteria|c__Gammaproteobacteria|o__Pasteurellales|f__Pasteurellaceae|g__GGB6813	0.000212211	0.728451	0.000259	0.6281	4.93445e-05	0.57246
logistic regression model	f__Synergistaceae	k__Bacteria|p__Synergistetes|c__Synergistia|o__Synergistales|f__Synergistaceae	0.000213235	0.727971	0.00034	0.7215	2.76402e-05	0.417741
logistic regression model	s__SR1_bacterium_human_oral_taxon_HOT_345	k__Bacteria|p__Candidatus_Absconditabacteria|c__Candidatus_Absconditabacteria_unclassified|o__Candidatus_Absconditabacteria_unclassified|f__Candidatus_Absconditabacteria_unclassified|g__Candidatus_Absconditabacteria_unclassified|s__SR1_bacterium_human_oral_taxon_HOT_345	0.000338823	0.72533	0.000338	0.6245	0.00018973	0.739556
logistic regression model	s__Solobacterium_moorei	k__Bacteria|p__Firmicutes|c__Erysipelotrichia|o__Erysipelotrichales|f__Erysipelotrichaceae|g__Solobacterium|s__Solobacterium_moorei	9.305e-05	0.72521	7.5e-05	0.5667	4.49632e-05	0.870036
logistic regression model	s__TM7_phylum_sp_oral_taxon_348	k__Bacteria|p__Candidatus_Saccharibacteria|c__Candidatus_Saccharibacteria_unclassified|o__Candidatus_Saccharibacteria_unclassified|f__Candidatus_Saccharibacteria_unclassified|g__Candidatus_Saccharibacteria_unclassified|s__TM7_phylum_sp_oral_taxon_348	0.000200576	0.717527	0.0003	0.6855	4.77835e-05	0.564208
logistic regression model	s__Solobacterium_SGB6834	k__Bacteria|p__Firmicutes|c__Erysipelotrichia|o__Erysipelotrichales|f__Erysipelotrichaceae|g__Solobacterium|s__Solobacterium_SGB6834	0.000557151	0.717047	0.000503	0.63	0.00103601	0.943785
logistic regression model	s__GGB4721_SGB6537	k__Bacteria|p__Firmicutes|c__CFGB1764|o__OFGB1764|f__FGB1764|g__GGB4721|s__GGB4721_SGB6537	0.00229087	0.714766	0.00172	0.6537	0.00125922	0.767922
logistic regression model	c__Deltaproteobacteria	k__Bacteria|p__Proteobacteria|c__Deltaproteobacteria	0.000332275	0.714166	0.000658	0.7406	3.19455e-05	0.341413
logistic regression model	s__Treponema_SGB3601	k__Bacteria|p__Spirochaetes|c__Spirochaetia|o__Spirochaetales|f__Treponemataceae|g__Treponema|s__Treponema_SGB3601	0.000632495	0.709364	0.000601	0.6205	0.000866611	0.861269
logistic regression model	s__Treponema_SGB3604	k__Bacteria|p__Spirochaetes|c__Spirochaetia|o__Spirochaetales|f__Treponemataceae|g__Treponema|s__Treponema_SGB3604	0.000425189	0.709364	0.000753	0.695	9.28934e-05	0.646209
logistic regression model	g__GGB3385	k__Bacteria|p__Firmicutes|c__Clostridia|o__Eubacteriales|f__Lachnospiraceae|g__GGB3385	0.000280329	0.709004	0.000337	0.653	0.000418097	0.817947
logistic regression model	s__Actinomyces_sp_HMSC035G02	k__Bacteria|p__Actinobacteria|c__Actinomycetia|o__Actinomycetales|f__Actinomycetaceae|g__Actinomyces|s__Actinomyces_sp_HMSC035G02	0.000521287	0.709004	0.000699	0.6533	0.000931589	0.971119
logistic regression model	o__OFGB1534	k__Bacteria|p__Firmicutes|c__CFGB1534|o__OFGB1534	0.00030125	0.707923	0.000359	0.6002	0.00019813	0.796802
logistic regression model	s__Stomatobaculum_longum	k__Bacteria|p__Firmicutes|c__Clostridia|o__Eubacteriales|f__Lachnospiraceae|g__Stomatobaculum|s__Stomatobaculum_longum	0.000567086	0.69952	0.00084	0.6566	0.000288095	0.520371
logistic regression model	s__Treponema_SGB3615	k__Bacteria|p__Spirochaetes|c__Spirochaetia|o__Spirochaetales|f__Treponemataceae|g__Treponema|s__Treponema_SGB3615	0.000682008	0.697479	0.00123	0.6983	0.00010647	0.559567
logistic regression model	s__GGB6813_SGB9727	k__Bacteria|p__Proteobacteria|c__Gammaproteobacteria|o__Pasteurellales|f__Pasteurellaceae|g__GGB6813|s__GGB6813_SGB9727	0.000184494	0.693397	0.000226	0.6005	4.31131e-05	0.545642
logistic regression model	s__Leptotrichia_sp_oral_taxon_212	k__Bacteria|p__Fusobacteria|c__Fusobacteriia|o__Fusobacteriales|f__Leptotrichiaceae|g__Leptotrichia|s__Leptotrichia_sp_oral_taxon_212	0.000119968	0.691837	0.000139	0.6182	9.53302e-05	0.858174
logistic regression model	o__Propionibacteriales	k__Bacteria|p__Actinobacteria|c__Actinomycetia|o__Propionibacteriales	0.000137821	0.683553	0.000206	0.6304	4.63274e-05	0.628159
logistic regression model	g__Candidatus_Nanosyncoccus	k__Bacteria|p__Candidatus_Saccharibacteria|c__Candidatus_Nanosyncoccalia|o__Candidatus_Nanosyncoccales|f__Candidatus_Nanosyncoccacae|g__Candidatus_Nanosyncoccus	0.000297135	0.680072	0.000241	0.5707	0.000647038	0.873646
logistic regression model	g__GGB2674	k__Bacteria|p__Spirochaetes|c__Spirochaetia|o__Spirochaetales|f__Treponemataceae|g__GGB2674	0.000182697	0.679352	0.000194	0.6179	4.54724e-05	0.519856
logistic regression model	s__GGB2666_SGB3592	k__Bacteria|p__Spirochaetes|c__Spirochaetia|o__Spirochaetales|f__Treponemataceae|g__GGB2666|s__GGB2666_SGB3592	0.00056371	0.676711	0.00084	0.6504	0.000141703	0.594121
logistic regression model	s__Eubacterium_saphenum	k__Bacteria|p__Firmicutes|c__Clostridia|o__Eubacteriales|f__Eubacteriales_Family_XIII_Incertae_Sedis|g__Eubacteriales_Family_XIII_Incertae_Sedis_unclassified|s__Eubacterium_saphenum	0.00082974	0.67539	0.0012	0.6609	0.000168398	0.544611
logistic regression model	s__Actinomyces_sp_ICM58	k__Bacteria|p__Actinobacteria|c__Actinomycetia|o__Actinomycetales|f__Actinomycetaceae|g__Actinomyces|s__Actinomyces_sp_ICM58	0.00213425	0.67503	0.00278	0.6651	0.0020757	0.851986
logistic regression model	g__Bacteroides	k__Bacteria|p__Bacteroidetes|c__Bacteroidia|o__Bacteroidales|f__Bacteroidaceae|g__Bacteroides	0.000334159	0.67479	0.000471	0.653	0.000224345	0.208355
logistic regression model	s__Parvimonas_SGB6649	k__Bacteria|p__Firmicutes|c__Tissierellia|o__Tissierellales|f__Peptoniphilaceae|g__Parvimonas|s__Parvimonas_SGB6649	0.000878959	0.67455	0.000749	0.6015	0.000876363	0.780815
logistic regression model	s__Haemophilus_parahaemolyticus	k__Bacteria|p__Proteobacteria|c__Gammaproteobacteria|o__Pasteurellales|f__Pasteurellaceae|g__Haemophilus|s__Haemophilus_parahaemolyticus	0.00138528	0.669508	0.00145	0.5917	0.00065907	0.750387
logistic regression model	s__Treponema_SGB69453	k__Bacteria|p__Spirochaetes|c__Spirochaetia|o__Spirochaetales|f__Treponemataceae|g__Treponema|s__Treponema_SGB69453	0.000134078	0.667947	0.000197	0.6182	3.13134e-05	0.450232
logistic regression model	s__Candidatus_Gracilibacteria_bacterium_GN02_873	k__Bacteria|p__Candidatus_Gracilibacteria|c__Candidatus_Gracilibacteria_unclassified|o__Candidatus_Gracilibacteria_unclassified|f__Candidatus_Gracilibacteria_unclassified|g__Candidatus_Gracilibacteria_unclassified|s__Candidatus_Gracilibacteria_bacterium_GN02_873	0.000668367	0.667227	0.000567	0.5822	0.000624137	0.630737
logistic regression model	g__Mycoplasma	k__Bacteria|p__Tenericutes|c__Mollicutes|o__Mycoplasmatales|f__Mycoplasmataceae|g__Mycoplasma	0.000233781	0.666267	0.000231	0.5579	0.000151279	0.749355
logistic regression model	g__GGB73508	k__Bacteria|p__Spirochaetes|c__Spirochaetia|o__Spirochaetales|f__Treponemataceae|g__GGB73508	0.000273014	0.665546	0.000416	0.6248	7.02569e-05	0.593089
logistic regression model	s__Porphyromonas_catoniae	k__Bacteria|p__Bacteroidetes|c__Bacteroidia|o__Bacteroidales|f__Porphyromonadaceae|g__Porphyromonas|s__Porphyromonas_catoniae	0.000168289	0.662185	0.000139	0.5497	0.000160532	0.827746
logistic regression model	s__Peptoanaerobacter_stomatis	k__Bacteria|p__Firmicutes|c__Clostridia|o__Eubacteriales|f__Peptostreptococcaceae|g__Peptoanaerobacter|s__Peptoanaerobacter_stomatis	6.21232e-05	0.660984	9.08e-05	0.6038	1.17536e-05	0.465188
logistic regression model	g__GGB4936	k__Bacteria|p__Candidatus_Absconditabacteria|c__Candidatus_Absconditabacteria_unclassified|o__Candidatus_Absconditabacteria_unclassified|f__Candidatus_Absconditabacteria_unclassified|g__GGB4936	0.00420528	0.655342	0.00263	0.5651	0.00879038	0.843218
logistic regression model	s__Shuttleworthia_satelles	k__Bacteria|p__Firmicutes|c__Clostridia|o__Eubacteriales|f__Lachnospiraceae|g__Shuttleworthia|s__Shuttleworthia_satelles	0.000119182	0.6509	0.000114	0.5235	1.425e-05	0.439402
logistic regression model	s__Treponema_SGB69454	k__Bacteria|p__Spirochaetes|c__Spirochaetia|o__Spirochaetales|f__Treponemataceae|g__Treponema|s__Treponema_SGB69454	0.000517067	0.647059	0.000795	0.6317	8.0149e-05	0.493553
logistic regression model	g__Phocaeicola	k__Bacteria|p__Bacteroidetes|c__Bacteroidia|o__Bacteroidales|f__Bacteroidaceae|g__Phocaeicola	5.3295e-05	0.645498	8.14e-05	0.6077	0.000169907	0.344507
logistic regression model	s__Phocaeicola_abscessus	k__Bacteria|p__Bacteroidetes|c__Bacteroidia|o__Bacteroidales|f__Bacteroidaceae|g__Phocaeicola|s__Phocaeicola_abscessus	5.27802e-05	0.644898	8.12e-05	0.6068	6.56482e-06	0.326457
logistic regression model	s__GGB2672_SGB3600	k__Bacteria|p__Spirochaetes|c__Spirochaetia|o__Spirochaetales|f__Treponemataceae|g__GGB2672|s__GGB2672_SGB3600	0.000866688	0.644418	0.000841	0.5822	0.00196126	0.856627
logistic regression model	g__GGB10852	k__Bacteria|p__Synergistetes|c__Synergistia|o__Synergistales|f__Synergistaceae|g__GGB10852	0.000124527	0.642497	0.000205	0.6533	1.69859e-05	0.382156
logistic regression model	s__Campylobacter_showae	k__Bacteria|p__Proteobacteria|c__Epsilonproteobacteria|o__Campylobacterales|f__Campylobacteraceae|g__Campylobacter|s__Campylobacter_showae	0.00107045	0.637935	0.00104	0.5602	0.00150231	0.764312
logistic regression model	s__Lachnoanaerobaculum_saburreum	k__Bacteria|p__Firmicutes|c__Clostridia|o__Eubacteriales|f__Lachnospiraceae|g__Lachnoanaerobaculum|s__Lachnoanaerobaculum_saburreum	6.21666e-05	0.636014	9.39e-05	0.5867	2.07294e-05	0.47344
logistic regression model	s__Selenomonas_felix	k__Bacteria|p__Firmicutes|c__Negativicutes|o__Selenomonadales|f__Selenomonadaceae|g__Selenomonas|s__Selenomonas_felix	0.000162133	0.634814	0.000196	0.5379	0.000110427	0.843218
logistic regression model	s__GGB4533_SGB97508	k__Bacteria|p__Firmicutes|c__CFGB1762|o__OFGB1762|f__FGB1762|g__GGB4533|s__GGB4533_SGB97508	0.000270972	0.634334	0.000356	0.5871	2.99358e-05	0.291387
logistic regression model	s__Prevotella_sp_HJM029	k__Bacteria|p__Bacteroidetes|c__Bacteroidia|o__Bacteroidales|f__Prevotellaceae|g__Prevotella|s__Prevotella_sp_HJM029	0.0017132	0.633493	0.00155	0.5782	0.00144758	0.667354
logistic regression model	s__Eubacterium_infirmum	k__Bacteria|p__Firmicutes|c__Clostridia|o__Eubacteriales|f__Eubacteriales_Family_XIII_Incertae_Sedis|g__Eubacteriales_Family_XIII_Incertae_Sedis_unclassified|s__Eubacterium_infirmum	6.91113e-05	0.632773	5.62e-05	0.4539	3.40919e-05	0.775142
logistic regression model	s__Prevotella_micans	k__Bacteria|p__Bacteroidetes|c__Bacteroidia|o__Bacteroidales|f__Prevotellaceae|g__Prevotella|s__Prevotella_micans	9.03114e-05	0.632053	0.000112	0.5444	3.05924e-05	0.575039
logistic regression model	f__FGB1781	k__Bacteria|p__Tenericutes|c__CFGB1781|o__OFGB1781|f__FGB1781	0.000831816	0.631212	0.000888	0.57	0.000248098	0.641568
logistic regression model	s__Bacteroides_heparinolyticus	k__Bacteria|p__Bacteroidetes|c__Bacteroidia|o__Bacteroidales|f__Bacteroidaceae|g__Bacteroides|s__Bacteroides_heparinolyticus	0.000292084	0.626771	0.000427	0.6071	2.07252e-05	0.1836
logistic regression model	f__Aerococcaceae	k__Bacteria|p__Firmicutes|c__Bacilli|o__Lactobacillales|f__Aerococcaceae	0.000112748	0.62377	0.000121	0.5297	4.3994e-05	0.443528
logistic regression model	s__Catonella_SGB96613	k__Bacteria|p__Firmicutes|c__Clostridia|o__Eubacteriales|f__Lachnospiraceae|g__Catonella|s__Catonella_SGB96613	0.000158347	0.623289	0.000156	0.5103	0.000268717	0.859722
logistic regression model	g__Abiotrophia	k__Bacteria|p__Firmicutes|c__Bacilli|o__Lactobacillales|f__Aerococcaceae|g__Abiotrophia	0.000111593	0.622689	0.000119	0.5271	4.299e-05	0.435276
logistic regression model	s__Treponema_socranskii	k__Bacteria|p__Spirochaetes|c__Spirochaetia|o__Spirochaetales|f__Treponemataceae|g__Treponema|s__Treponema_socranskii	6.28886e-05	0.622449	0.000103	0.5694	1.10606e-05	0.42393
logistic regression model	o__Eggerthellales	k__Bacteria|p__Actinobacteria|c__Coriobacteriia|o__Eggerthellales	9.57461e-05	0.621729	8.02e-05	0.4634	1.91699e-05	0.402785
logistic regression model	g__Bergeyella	k__Bacteria|p__Bacteroidetes|c__Flavobacteriia|o__Flavobacteriales|f__Weeksellaceae|g__Bergeyella	0.000447413	0.620408	0.000422	0.5471	0.000180666	0.701908
logistic regression model	s__Catonella_SGB69305	k__Bacteria|p__Firmicutes|c__Clostridia|o__Eubacteriales|f__Lachnospiraceae|g__Catonella|s__Catonella_SGB69305	7.49544e-05	0.616567	7.91e-05	0.4805	1.65902e-05	0.398659
logistic regression model	f__FGB1021	k__Bacteria|p__Spirochaetes|c__CFGB1021|o__OFGB1021|f__FGB1021	0.000273083	0.615726	0.000432	0.5799	6.3424e-05	0.514183
logistic regression model	s__Treponema_SGB3588	k__Bacteria|p__Spirochaetes|c__Spirochaetia|o__Spirochaetales|f__Treponemataceae|g__Treponema|s__Treponema_SGB3588	9.11962e-05	0.613205	0.000172	0.6218	1.11279e-05	0.296029
logistic regression model	g__GGB1088	k__Bacteria|p__Bacteroidetes|c__Bacteroidia|o__Bacteroidales|f__Porphyromonadaceae|g__GGB1088	0.000671549	0.612845	0.000486	0.5346	0.000925986	0.658587
logistic regression model	s__Porphyromonas_SGB2015	k__Bacteria|p__Bacteroidetes|c__Bacteroidia|o__Bacteroidales|f__Porphyromonadaceae|g__Porphyromonas|s__Porphyromonas_SGB2015	0.00396449	0.612005	0.0021	0.5366	0.00469473	0.775142
logistic regression model	s__Alloprevotella_rava	k__Bacteria|p__Bacteroidetes|c__Bacteroidia|o__Bacteroidales|f__Prevotellaceae|g__Alloprevotella|s__Alloprevotella_rava	0.000104775	0.610204	0.000122	0.489	3.6172e-05	0.566787
logistic regression model	o__Bifidobacteriales	k__Bacteria|p__Actinobacteria|c__Actinomycetia|o__Bifidobacteriales	0.000511299	0.607683	0.000724	0.5543	6.4236e-05	0.315111
logistic regression model	s__GGB2665_SGB3591	k__Bacteria|p__Spirochaetes|c__Spirochaetia|o__Spirochaetales|f__Treponemataceae|g__GGB2665|s__GGB2665_SGB3591	0.00067428	0.607563	0.000993	0.5913	0.000176404	0.500258
logistic regression model	s__Fusobacterium_hwasookii	k__Bacteria|p__Fusobacteria|c__Fusobacteriia|o__Fusobacteriales|f__Fusobacteriaceae|g__Fusobacterium|s__Fusobacterium_hwasookii	0.000151391	0.605882	0.000191	0.5385	2.99698e-05	0.498195
logistic regression model	s__Eikenella_corrodens	k__Bacteria|p__Proteobacteria|c__Betaproteobacteria|o__Neisseriales|f__Neisseriaceae|g__Eikenella|s__Eikenella_corrodens	0.000110198	0.605522	0.000144	0.5438	4.77176e-05	0.624549
logistic regression model	s__GGB10852_SGB17521	k__Bacteria|p__Synergistetes|c__Synergistia|o__Synergistales|f__Synergistaceae|g__GGB10852|s__GGB10852_SGB17521	9.01639e-05	0.604922	0.000152	0.6143	1.30601e-05	0.365652
logistic regression model	g__GGB4400	k__Bacteria|p__Fusobacteria|c__Fusobacteriia|o__Fusobacteriales|f__Leptotrichiaceae|g__GGB4400	6.58274e-05	0.603721	7.91e-05	0.508	2.61348e-05	0.648788
logistic regression model	s__Cardiobacterium_SGB69135	k__Bacteria|p__Proteobacteria|c__Gammaproteobacteria|o__Cardiobacteriales|f__Cardiobacteriaceae|g__Cardiobacterium|s__Cardiobacterium_SGB69135	5.57679e-05	0.603361	8.8e-05	0.5559	1.15084e-05	0.486333
logistic regression model	g__GGB1473	k__Bacteria|p__Bacteroidetes|c__Bacteroidia|o__Bacteroidales|f__Porphyromonadaceae|g__GGB1473	0.000766171	0.601681	0.000683	0.5156	0.000136024	0.458484
logistic regression model	f__FGB76125	k__Bacteria|p__Bacteroidetes|c__CFGB76125|o__OFGB76125|f__FGB76125	0.0018523	0.596399	0.00143	0.5261	0.00222057	0.668386
logistic regression model	s__GGB4533_SGB6246	k__Bacteria|p__Firmicutes|c__CFGB1762|o__OFGB1762|f__FGB1762|g__GGB4533|s__GGB4533_SGB6246	0.000169035	0.596399	0.000226	0.5615	1.22285e-05	0.200619
logistic regression model	s__Olsenella_sp_oral_taxon_807	k__Bacteria|p__Actinobacteria|c__Coriobacteriia|o__Coriobacteriales|f__Atopobiaceae|g__Olsenella|s__Olsenella_sp_oral_taxon_807	8.14328e-05	0.594118	0.000128	0.55	1.54843e-05	0.423414
logistic regression model	s__Prevotella_scopos	k__Bacteria|p__Bacteroidetes|c__Bacteroidia|o__Bacteroidales|f__Prevotellaceae|g__Prevotella|s__Prevotella_scopos	0.000969459	0.591357	0.000739	0.4562	0.00096421	0.877256
logistic regression model	s__Streptococcus_constellatus	k__Bacteria|p__Firmicutes|c__Bacilli|o__Lactobacillales|f__Streptococcaceae|g__Streptococcus|s__Streptococcus_constellatus	0.00013105	0.585474	0.000179	0.5136	4.9731e-05	0.492006
logistic regression model	s__Campylobacter_SGB19347	k__Bacteria|p__Proteobacteria|c__Epsilonproteobacteria|o__Campylobacterales|f__Campylobacteraceae|g__Campylobacter|s__Campylobacter_SGB19347	5.965e-05	0.585234	5.46e-05	0.4926	0.000204002	0.963899
logistic regression model	s__Lachnoanaerobaculum_gingivalis	k__Bacteria|p__Firmicutes|c__Clostridia|o__Eubacteriales|f__Lachnospiraceae|g__Lachnoanaerobaculum|s__Lachnoanaerobaculum_gingivalis	4.83383e-05	0.585114	5.52e-05	0.5025	0.000123122	0.930376
logistic regression model	s__Streptococcus_sp_F0442	k__Bacteria|p__Firmicutes|c__Bacilli|o__Lactobacillales|f__Streptococcaceae|g__Streptococcus|s__Streptococcus_sp_F0442	0.000195843	0.583553	0.000327	0.5385	0.000276054	0.82001
logistic regression model	g__Arachnia	k__Bacteria|p__Actinobacteria|c__Actinomycetia|o__Propionibacteriales|f__Propionibacteriaceae|g__Arachnia	9.24636e-05	0.583193	0.000125	0.5212	3.7409e-05	0.596699
logistic regression model	s__GGB12785_SGB19823	k__Bacteria|p__Candidatus_Saccharibacteria|c__Candidatus_Nanosyncoccalia|o__Candidatus_Nanogingivales|f__Candidatus_Nanogingivalaceae|g__GGB12785|s__GGB12785_SGB19823	0.000532278	0.582833	0.000753	0.5316	0.000509893	0.634863
logistic regression model	s__GGB3887_SGB5270	k__Bacteria|p__Firmicutes|c__Clostridia|o__Eubacteriales|f__Lachnospiraceae|g__GGB3887|s__GGB3887_SGB5270	0.000300514	0.581873	0.000375	0.5205	0.000182488	0.451779
logistic regression model	g__Slackia	k__Bacteria|p__Actinobacteria|c__Coriobacteriia|o__Eggerthellales|f__Eggerthellaceae|g__Slackia	4.88152e-05	0.580912	3.54e-05	0.4005	1.16966e-05	0.379061
logistic regression model	s__Prevotella_sp_oral_taxon_475	k__Bacteria|p__Bacteroidetes|c__Bacteroidia|o__Bacteroidales|f__Prevotellaceae|g__Prevotella|s__Prevotella_sp_oral_taxon_475	0.000126263	0.580552	0.000102	0.4687	3.81619e-05	0.425993
logistic regression model	s__Prevotella_enoeca	k__Bacteria|p__Bacteroidetes|c__Bacteroidia|o__Bacteroidales|f__Prevotellaceae|g__Prevotella|s__Prevotella_enoeca	9.81303e-05	0.576351	0.000106	0.468	3.22519e-05	0.560083
logistic regression model	s__Actinomyces_SGB17157	k__Bacteria|p__Actinobacteria|c__Actinomycetia|o__Actinomycetales|f__Actinomycetaceae|g__Actinomyces|s__Actinomyces_SGB17157	0.000413018	0.57455	0.000446	0.5218	0.000659962	0.829809
logistic regression model	s__Prevotellaceae_bacterium_Marseille_P2826	k__Bacteria|p__Bacteroidetes|c__Bacteroidia|o__Bacteroidales|f__Prevotellaceae|g__Prevotellaceae_unclassified|s__Prevotellaceae_bacterium_Marseille_P2826	0.00201575	0.570108	0.0013	0.4887	0.00549709	0.836514
logistic regression model	s__GGB1202_SGB1567	k__Bacteria|p__Bacteroidetes|c__CFGB570|o__OFGB570|f__FGB570|g__GGB1202|s__GGB1202_SGB1567	0.0015106	0.568547	0.00119	0.4877	0.000947155	0.502837
logistic regression model	s__Candidatus_Absconditabacteria_unclassified_SGB6894	k__Bacteria|p__Candidatus_Absconditabacteria|c__Candidatus_Absconditabacteria_unclassified|o__Candidatus_Absconditabacteria_unclassified|f__Candidatus_Absconditabacteria_unclassified|g__Candidatus_Absconditabacteria_unclassified|s__Candidatus_Absconditabacteria_unclassified_SGB6894	0.0027156	0.567947	0.00172	0.5064	0.00401999	0.717896
logistic regression model	s__TM7_phylum_sp_oral_taxon_350	k__Bacteria|p__Candidatus_Saccharibacteria|c__Candidatus_Saccharibacteria_unclassified|o__Candidatus_Saccharibacteria_unclassified|f__Candidatus_Saccharibacteria_unclassified|g__Candidatus_Saccharibacteria_unclassified|s__TM7_phylum_sp_oral_taxon_350	0.000111193	0.563866	0.000181	0.5343	2.47162e-05	0.450748
logistic regression model	o__Desulfovibrionales	k__Bacteria|p__Proteobacteria|c__Deltaproteobacteria|o__Desulfovibrionales	0.000284775	0.563025	0.00059	0.593	2.68477e-05	0.215575
logistic regression model	s__Eikenella_halliae	k__Bacteria|p__Proteobacteria|c__Betaproteobacteria|o__Neisseriales|f__Neisseriaceae|g__Eikenella|s__Eikenella_halliae	0.000118207	0.562065	0.000152	0.4874	2.49347e-05	0.489943
logistic regression model	s__Prevotella_aurantiaca	k__Bacteria|p__Bacteroidetes|c__Bacteroidia|o__Bacteroidales|f__Prevotellaceae|g__Prevotella|s__Prevotella_aurantiaca	0.00680786	0.561945	0.0035	0.4762	0.0182336	0.895307
logistic regression model	f__Eubacteriales_unclassified	k__Bacteria|p__Firmicutes|c__Clostridia|o__Eubacteriales|f__Eubacteriales_unclassified	0.00011418	0.560264	0.000108	0.4821	0.000173586	0.778236
logistic regression model	s__Oribacterium_SGB5287	k__Bacteria|p__Firmicutes|c__Clostridia|o__Eubacteriales|f__Lachnospiraceae|g__Oribacterium|s__Oribacterium_SGB5287	0.000223202	0.560264	0.000254	0.4743	0.000238411	0.656524
logistic regression model	s__GGB3385_SGB4472	k__Bacteria|p__Firmicutes|c__Clostridia|o__Eubacteriales|f__Lachnospiraceae|g__GGB3385|s__GGB3385_SGB4472	4.02751e-05	0.559664	5.64e-05	0.5185	2.47644e-05	0.670449
logistic regression model	s__Oribacterium_SGB96486	k__Bacteria|p__Firmicutes|c__Clostridia|o__Eubacteriales|f__Lachnospiraceae|g__Oribacterium|s__Oribacterium_SGB96486	0.000112573	0.558944	0.000132	0.4713	0.00010195	0.745229
logistic regression model	s__GGB70946_SGB95408	k__Bacteria|p__Firmicutes|c__Clostridia|o__Eubacteriales|f__Eubacteriales_unclassified|g__GGB70946|s__GGB70946_SGB95408	0.00011294	0.558824	0.000108	0.4808	0.000160405	0.776689
logistic regression model	g__GGB71076	k__Bacteria|p__Spirochaetes|c__Spirochaetia|o__Spirochaetales|f__Treponemataceae|g__GGB71076	0.000519296	0.557503	0.000852	0.5464	0.000115231	0.496648
logistic regression model	g__GGB4783	k__Bacteria|p__Firmicutes|c__Clostridia|o__Eubacteriales|f__Peptostreptococcaceae|g__GGB4783	0.00017576	0.553421	0.000176	0.4798	0.000279961	0.814853
logistic regression model	s__Mycoplasma_orale	k__Bacteria|p__Tenericutes|c__Mollicutes|o__Mycoplasmatales|f__Mycoplasmataceae|g__Mycoplasma|s__Mycoplasma_orale	0.000177889	0.54946	0.000153	0.448	0.000140981	0.662197
logistic regression model	s__Candidatus_Nanosyncoccus_SGB19793	k__Bacteria|p__Candidatus_Saccharibacteria|c__Candidatus_Nanosyncoccalia|o__Candidatus_Nanosyncoccales|f__Candidatus_Nanosyncoccacae|g__Candidatus_Nanosyncoccus|s__Candidatus_Nanosyncoccus_SGB19793	0.000229187	0.546098	0.00018	0.4615	0.000555589	0.800413
logistic regression model	s__GGB2666_SGB69449	k__Bacteria|p__Spirochaetes|c__Spirochaetia|o__Spirochaetales|f__Treponemataceae|g__GGB2666|s__GGB2666_SGB69449	0.000135927	0.544898	0.000173	0.4526	2.89733e-05	0.345023
logistic regression model	s__Oribacterium_SGB96555	k__Bacteria|p__Firmicutes|c__Clostridia|o__Eubacteriales|f__Lachnospiraceae|g__Oribacterium|s__Oribacterium_SGB96555	0.000106561	0.542737	0.00012	0.4575	0.000291836	0.8623
logistic regression model	s__Prevotella_pleuritidis	k__Bacteria|p__Bacteroidetes|c__Bacteroidia|o__Bacteroidales|f__Prevotellaceae|g__Prevotella|s__Prevotella_pleuritidis	0.000820095	0.542137	0.00109	0.5143	0.000309188	0.640021
logistic regression model	s__GGB12785_SGB19827	k__Bacteria|p__Candidatus_Saccharibacteria|c__Candidatus_Nanosyncoccalia|o__Candidatus_Nanogingivales|f__Candidatus_Nanogingivalaceae|g__GGB12785|s__GGB12785_SGB19827	0.000192109	0.542017	0.000187	0.4549	0.000439455	0.665807
logistic regression model	s__Actinomyces_SGB17154	k__Bacteria|p__Actinobacteria|c__Actinomycetia|o__Actinomycetales|f__Actinomycetaceae|g__Actinomyces|s__Actinomyces_SGB17154	0.000570072	0.535534	0.000789	0.4451	0.000439275	0.351212
logistic regression model	s__Selenomonas_massiliensis	k__Bacteria|p__Firmicutes|c__Negativicutes|o__Selenomonadales|f__Selenomonadaceae|g__Selenomonas|s__Selenomonas_massiliensis	6.80205e-05	0.533974	8e-05	0.4415	1.85788e-05	0.270242
logistic regression model	s__Fretibacterium_fastidiosum	k__Bacteria|p__Synergistetes|c__Synergistia|o__Synergistales|f__Synergistaceae|g__Fretibacterium|s__Fretibacterium_fastidiosum	6.09252e-05	0.531333	9.55e-05	0.5195	7.24818e-06	0.287777
logistic regression model	s__Selenomonas_flueggei	k__Bacteria|p__Firmicutes|c__Negativicutes|o__Selenomonadales|f__Selenomonadaceae|g__Selenomonas|s__Selenomonas_flueggei	7.5295e-05	0.530132	8.33e-05	0.4195	1.24675e-05	0.252708
logistic regression model	s__Granulicatella_SGB8239	k__Bacteria|p__Firmicutes|c__Bacilli|o__Lactobacillales|f__Carnobacteriaceae|g__Granulicatella|s__Granulicatella_SGB8239	4.63798e-05	0.529412	3.83e-05	0.3962	3.83558e-05	0.425477
logistic regression model	s__Leptotrichia_shahii	k__Bacteria|p__Fusobacteria|c__Fusobacteriia|o__Fusobacteriales|f__Leptotrichiaceae|g__Leptotrichia|s__Leptotrichia_shahii	6.9251e-05	0.529292	0.000106	0.4877	1.51985e-05	0.474987
logistic regression model	s__Olsenella_uli	k__Bacteria|p__Actinobacteria|c__Coriobacteriia|o__Coriobacteriales|f__Atopobiaceae|g__Olsenella|s__Olsenella_uli	5.63902e-05	0.528451	6.86e-05	0.4182	9.39718e-06	0.305828
logistic regression model	s__Porphyromonas_SGB2037	k__Bacteria|p__Bacteroidetes|c__Bacteroidia|o__Bacteroidales|f__Porphyromonadaceae|g__Porphyromonas|s__Porphyromonas_SGB2037	0.000200434	0.52581	0.000225	0.4575	0.000154271	0.644662
logistic regression model	g__Schaalia	k__Bacteria|p__Actinobacteria|c__Actinomycetia|o__Actinomycetales|f__Actinomycetaceae|g__Schaalia	8.03078e-05	0.52509	9.72e-05	0.4274	0.00026378	0.721506
logistic regression model	s__Haemophilus_sputorum	k__Bacteria|p__Proteobacteria|c__Gammaproteobacteria|o__Pasteurellales|f__Pasteurellaceae|g__Haemophilus|s__Haemophilus_sputorum	0.000399527	0.52389	0.000406	0.4802	0.00124265	0.91542
logistic regression model	s__GGB3386_SGB4474	k__Bacteria|p__Firmicutes|c__Clostridia|o__Eubacteriales|f__Lachnospiraceae|g__GGB3386|s__GGB3386_SGB4474	5.86283e-05	0.517047	0.000109	0.5316	1.07403e-05	0.309438
logistic regression model	s__Veillonella_sp_3310	k__Bacteria|p__Firmicutes|c__Negativicutes|o__Veillonellales|f__Veillonellaceae|g__Veillonella|s__Veillonella_sp_3310	0.000351164	0.517047	0.000328	0.4352	0.000157237	0.368747
logistic regression model	s__Actinobaculum_sp_oral_taxon_183	k__Bacteria|p__Actinobacteria|c__Actinomycetia|o__Actinomycetales|f__Actinomycetaceae|g__Actinobaculum|s__Actinobaculum_sp_oral_taxon_183	0.000119611	0.514886	0.000172	0.468	4.65101e-05	0.588963
logistic regression model	s__Leptotrichia_sp_oral_taxon_218	k__Bacteria|p__Fusobacteria|c__Fusobacteriia|o__Fusobacteriales|f__Leptotrichiaceae|g__Leptotrichia|s__Leptotrichia_sp_oral_taxon_218	0.000908784	0.512845	0.00113	0.4392	0.000590847	0.461578
logistic regression model	s__GGB1611_SGB2208	k__Bacteria|p__Bacteroidetes|c__CFGB651|o__OFGB651|f__FGB651|g__GGB1611|s__GGB1611_SGB2208	0.000248226	0.507203	0.000362	0.4749	9.8592e-05	0.540485
logistic regression model	s__Oribacterium_sp_oral_taxon_078	k__Bacteria|p__Firmicutes|c__Clostridia|o__Eubacteriales|f__Lachnospiraceae|g__Oribacterium|s__Oribacterium_sp_oral_taxon_078	3.42578e-05	0.50036	4.74e-05	0.4175	7.95196e-06	0.419804
logistic regression model	s__GGB3008_SGB3999	k__Bacteria|p__Firmicutes|c__CFGB1230|o__OFGB1230|f__FGB1230|g__GGB3008|s__GGB3008_SGB3999	0.000215202	0.4994	0.000216	0.4326	0.000502447	0.793192
logistic regression model	o__Candidatus_Nanosynbacterales	k__Bacteria|p__Candidatus_Saccharibacteria|c__Candidatus_Saccharimonia|o__Candidatus_Nanosynbacterales	7.18712e-05	0.493758	8.47e-05	0.4051	9.15577e-06	0.3213
logistic regression model	s__Prevotella_multisaccharivorax	k__Bacteria|p__Bacteroidetes|c__Bacteroidia|o__Bacteroidales|f__Prevotellaceae|g__Prevotella|s__Prevotella_multisaccharivorax	0.00016391	0.490636	0.00022	0.4565	2.27628e-06	0.082001
logistic regression model	g__GGB45697	k__Bacteria|p__Bacteroidetes|c__Bacteroidia|o__Bacteroidales|f__Porphyromonadaceae|g__GGB45697	0.000304309	0.490036	0.000261	0.4241	0.000153789	0.401238
logistic regression model	s__Porphyromonas_sp_oral_taxon_275	k__Bacteria|p__Bacteroidetes|c__Bacteroidia|o__Bacteroidales|f__Porphyromonadaceae|g__Porphyromonas|s__Porphyromonas_sp_oral_taxon_275	0.000388998	0.480312	0.000364	0.4201	8.98997e-05	0.379577
logistic regression model	f__Cellulomonadaceae	k__Bacteria|p__Actinobacteria|c__Actinomycetia|o__Micrococcales|f__Cellulomonadaceae	0.000115174	0.478992	0.000135	0.3942	6.55996e-06	0.185147
logistic regression model	f__FGB73294	k__Bacteria|p__Firmicutes|c__CFGB73294|o__OFGB73294|f__FGB73294	4.02027e-05	0.476951	6.39e-05	0.4319	3.78318e-06	0.187726
logistic regression model	s__Treponema_lecithinolyticum	k__Bacteria|p__Spirochaetes|c__Spirochaetia|o__Spirochaetales|f__Treponemataceae|g__Treponema|s__Treponema_lecithinolyticum	0.000137863	0.476831	0.000245	0.4746	3.33012e-05	0.499742
logistic regression model	s__Treponema_SGB3603	k__Bacteria|p__Spirochaetes|c__Spirochaetia|o__Spirochaetales|f__Treponemataceae|g__Treponema|s__Treponema_SGB3603	0.000181413	0.47515	0.000299	0.4303	7.54079e-05	0.577617
logistic regression model	g__GGB1833	k__Bacteria|p__Bacteroidetes|c__Flavobacteriia|o__Flavobacteriales|f__Flavobacteriaceae|g__GGB1833	0.000161911	0.472389	0.000174	0.4133	0.000108155	0.646209
logistic regression model	s__Catonella_morbi	k__Bacteria|p__Firmicutes|c__Clostridia|o__Eubacteriales|f__Lachnospiraceae|g__Catonella|s__Catonella_morbi	2.09645e-05	0.471549	3.02e-05	0.3929	1.23059e-05	0.49149
logistic regression model	s__GGB4786_SGB6625	k__Bacteria|p__Firmicutes|c__Clostridia|o__Eubacteriales|f__Peptostreptococcaceae|g__GGB4786|s__GGB4786_SGB6625	0.000238369	0.468667	0.000232	0.4077	0.000381515	0.781331
logistic regression model	s__Neisseria_SGB9428	k__Bacteria|p__Proteobacteria|c__Betaproteobacteria|o__Neisseriales|f__Neisseriaceae|g__Neisseria|s__Neisseria_SGB9428	0.000123708	0.468307	0.000177	0.4221	2.59954e-05	0.37803
logistic regression model	o__OFGB9314	k__Bacteria|p__Candidatus_Saccharibacteria|c__CFGB9314|o__OFGB9314	0.000126681	0.467467	0.000103	0.3788	0.000162993	0.666839
logistic regression model	s__Candidatus_Saccharibacteria_unclassified_SGB95710	k__Bacteria|p__Candidatus_Saccharibacteria|c__Candidatus_Saccharibacteria_unclassified|o__Candidatus_Saccharibacteria_unclassified|f__Candidatus_Saccharibacteria_unclassified|g__Candidatus_Saccharibacteria_unclassified|s__Candidatus_Saccharibacteria_unclassified_SGB95710	4.84402e-05	0.466267	4.15e-05	0.3362	6.41385e-05	0.753997
logistic regression model	s__Prevotella_oralis	k__Bacteria|p__Bacteroidetes|c__Bacteroidia|o__Bacteroidales|f__Prevotellaceae|g__Prevotella|s__Prevotella_oralis	6.55693e-05	0.466267	0.000103	0.3801	1.69784e-05	0.315627
logistic regression model	s__Treponema_SGB69443	k__Bacteria|p__Spirochaetes|c__Spirochaetia|o__Spirochaetales|f__Treponemataceae|g__Treponema|s__Treponema_SGB69443	4.53015e-05	0.462905	7.3e-05	0.4579	5.67365e-06	0.227437
logistic regression model	s__Capnocytophaga_SGB2499	k__Bacteria|p__Bacteroidetes|c__Flavobacteriia|o__Flavobacteriales|f__Flavobacteriaceae|g__Capnocytophaga|s__Capnocytophaga_SGB2499	0.00106717	0.461945	0.000951	0.4142	0.00178488	0.782878
logistic regression model	g__Peptostreptococcaceae_unclassified	k__Bacteria|p__Firmicutes|c__Clostridia|o__Eubacteriales|f__Peptostreptococcaceae|g__Peptostreptococcaceae_unclassified	4.0363e-05	0.461825	6.42e-05	0.4264	1.2165e-05	0.42393
logistic regression model	s__Neisseria_cinerea	k__Bacteria|p__Proteobacteria|c__Betaproteobacteria|o__Neisseriales|f__Neisseriaceae|g__Neisseria|s__Neisseria_cinerea	0.000633484	0.457263	0.000515	0.4005	0.000219825	0.376483
logistic regression model	s__Solobacterium_SGB6828	k__Bacteria|p__Firmicutes|c__Erysipelotrichia|o__Erysipelotrichales|f__Erysipelotrichaceae|g__Solobacterium|s__Solobacterium_SGB6828	0.000436286	0.457263	0.00037	0.3677	0.000257964	0.612687
logistic regression model	s__Selenomonas_SGB5900	k__Bacteria|p__Firmicutes|c__Negativicutes|o__Selenomonadales|f__Selenomonadaceae|g__Selenomonas|s__Selenomonas_SGB5900	0.000155746	0.455222	0.000147	0.3516	0.000219109	0.687468
logistic regression model	s__Selenomonas_SGB5896	k__Bacteria|p__Firmicutes|c__Negativicutes|o__Selenomonadales|f__Selenomonadaceae|g__Selenomonas|s__Selenomonas_SGB5896	5.44309e-05	0.454742	7.32e-05	0.3683	1.39751e-05	0.440949
logistic regression model	g__GGB2671	k__Bacteria|p__Spirochaetes|c__CFGB1021|o__OFGB1021|f__FGB1021|g__GGB2671	0.0001874	0.454262	0.000325	0.449	4.02159e-05	0.368747
logistic regression model	s__Selenomonas_sp_oral_taxon_126	k__Bacteria|p__Firmicutes|c__Negativicutes|o__Selenomonadales|f__Selenomonadaceae|g__Selenomonas|s__Selenomonas_sp_oral_taxon_126	2.68285e-05	0.454262	3.28e-05	0.3575	6.0259e-06	0.292935
logistic regression model	s__Abiotrophia_defectiva	k__Bacteria|p__Firmicutes|c__Bacilli|o__Lactobacillales|f__Aerococcaceae|g__Abiotrophia|s__Abiotrophia_defectiva	5.93356e-05	0.453301	6.55e-05	0.3726	1.49379e-05	0.216091
logistic regression model	s__Campylobacter_SGB19292	k__Bacteria|p__Proteobacteria|c__Epsilonproteobacteria|o__Campylobacterales|f__Campylobacteraceae|g__Campylobacter|s__Campylobacter_SGB19292	2.35254e-05	0.452821	3.91e-05	0.4372	3.93639e-06	0.234657
logistic regression model	s__GGB45697_SGB2042	k__Bacteria|p__Bacteroidetes|c__Bacteroidia|o__Bacteroidales|f__Porphyromonadaceae|g__GGB45697|s__GGB45697_SGB2042	0.000270697	0.4509	0.000235	0.3959	0.000140561	0.336772
logistic regression model	s__Capnocytophaga_SGB78737	k__Bacteria|p__Bacteroidetes|c__Flavobacteriia|o__Flavobacteriales|f__Flavobacteriaceae|g__Capnocytophaga|s__Capnocytophaga_SGB78737	0.001245	0.44922	0.00106	0.3798	0.00108755	0.738009
logistic regression model	s__Mogibacterium_pumilum	k__Bacteria|p__Firmicutes|c__Clostridia|o__Eubacteriales|f__Eubacteriales_Family_XIII_Incertae_Sedis|g__Mogibacterium|s__Mogibacterium_pumilum	1.81021e-05	0.448139	1.41e-05	0.3434	2.36514e-05	0.61114
logistic regression model	c__Alphaproteobacteria	k__Bacteria|p__Proteobacteria|c__Alphaproteobacteria	5.43119e-05	0.447419	6.49e-05	0.3582	2.45013e-05	0.552862
logistic regression model	g__GGB1845	k__Bacteria|p__Bacteroidetes|c__Flavobacteriia|o__Flavobacteriales|f__Weeksellaceae|g__GGB1845	4.08351e-05	0.446939	4.98e-05	0.3401	4.54267e-05	0.532749
logistic regression model	s__GGB3385_SGB4473	k__Bacteria|p__Firmicutes|c__Clostridia|o__Eubacteriales|f__Lachnospiraceae|g__GGB3385|s__GGB3385_SGB4473	2.89009e-05	0.445378	3.74e-05	0.4034	1.53589e-05	0.51934
logistic regression model	s__Treponema_sp_Marseille_Q4130	k__Bacteria|p__Spirochaetes|c__Spirochaetia|o__Spirochaetales|f__Treponemataceae|g__Treponema|s__Treponema_sp_Marseille_Q4130	3.13833e-05	0.444898	4.07e-05	0.3726	2.62568e-06	0.15214
logistic regression model	g__GGB49499	k__Bacteria|p__Spirochaetes|c__CFGB1021|o__OFGB1021|f__FGB1021|g__GGB49499	8.56826e-05	0.443217	0.000108	0.3782	2.18369e-05	0.362558
logistic regression model	s__Lachnoanaerobaculum_sp_Marseille_Q4761	k__Bacteria|p__Firmicutes|c__Clostridia|o__Eubacteriales|f__Lachnospiraceae|g__Lachnoanaerobaculum|s__Lachnoanaerobaculum_sp_Marseille_Q4761	1.64446e-05	0.442257	2.33e-05	0.3755	2.21538e-05	0.673027
logistic regression model	s__GGB6688_SGB9473	k__Bacteria|p__Proteobacteria|c__Betaproteobacteria|o__Neisseriales|f__Neisseriaceae|g__GGB6688|s__GGB6688_SGB9473	0.000141387	0.435894	0.000148	0.3693	0.00017764	0.66787
logistic regression model	s__Campylobacter_SGB96438	k__Bacteria|p__Proteobacteria|c__Epsilonproteobacteria|o__Campylobacterales|f__Campylobacteraceae|g__Campylobacter|s__Campylobacter_SGB96438	5.58928e-05	0.435534	7.04e-05	0.3782	7.43525e-05	0.869005
logistic regression model	s__Abiotrophia_sp_HMSC24B09	k__Bacteria|p__Firmicutes|c__Bacilli|o__Lactobacillales|f__Aerococcaceae|g__Abiotrophia|s__Abiotrophia_sp_HMSC24B09	5.22568e-05	0.433733	5.31e-05	0.3591	2.80523e-05	0.372873
logistic regression model	s__Oribacterium_SGB5283	k__Bacteria|p__Firmicutes|c__Clostridia|o__Eubacteriales|f__Lachnospiraceae|g__Oribacterium|s__Oribacterium_SGB5283	9.01455e-05	0.433133	0.000122	0.3887	0.000296205	0.803507
logistic regression model	o__Hyphomicrobiales	k__Bacteria|p__Proteobacteria|c__Alphaproteobacteria|o__Hyphomicrobiales	5.20117e-05	0.431933	5.48e-05	0.3431	1.88493e-05	0.465188
logistic regression model	s__GGB1832_SGB2476	k__Bacteria|p__Bacteroidetes|c__Flavobacteriia|o__Flavobacteriales|f__Flavobacteriaceae|g__GGB1832|s__GGB1832_SGB2476	0.000485958	0.428812	0.000402	0.3624	0.000335612	0.471893
logistic regression model	f__Methylobacteriaceae	k__Bacteria|p__Proteobacteria|c__Alphaproteobacteria|o__Hyphomicrobiales|f__Methylobacteriaceae	5.17203e-05	0.428331	5.34e-05	0.3345	1.87149e-05	0.444559
logistic regression model	s__Streptococcus_sinensis	k__Bacteria|p__Firmicutes|c__Bacilli|o__Lactobacillales|f__Streptococcaceae|g__Streptococcus|s__Streptococcus_sinensis	5.47152e-05	0.427011	8.34e-05	0.4142	6.55236e-06	0.189789
logistic regression model	s__GGB4733_SGB6555	k__Bacteria|p__Tenericutes|c__CFGB1781|o__OFGB1781|f__FGB1781|g__GGB4733|s__GGB4733_SGB6555	0.000562302	0.426651	0.000559	0.3805	0.000186133	0.504899
logistic regression model	s__Actinomyces_naeslundii	k__Bacteria|p__Actinobacteria|c__Actinomycetia|o__Actinomycetales|f__Actinomycetaceae|g__Actinomyces|s__Actinomyces_naeslundii	5.98631e-05	0.420768	0.000116	0.4369	2.64002e-05	0.494585
logistic regression model	g__Scardovia	k__Bacteria|p__Actinobacteria|c__Actinomycetia|o__Bifidobacteriales|f__Bifidobacteriaceae|g__Scardovia	0.000125723	0.419568	0.000193	0.3585	2.11541e-05	0.267148
logistic regression model	s__Prevotella_sp_oral_taxon_376	k__Bacteria|p__Bacteroidetes|c__Bacteroidia|o__Bacteroidales|f__Prevotellaceae|g__Prevotella|s__Prevotella_sp_oral_taxon_376	4.12929e-05	0.414766	4.43e-05	0.3073	3.71602e-06	0.173285
logistic regression model	s__Porphyromonas_SGB2038	k__Bacteria|p__Bacteroidetes|c__Bacteroidia|o__Bacteroidales|f__Porphyromonadaceae|g__Porphyromonas|s__Porphyromonas_SGB2038	0.000164027	0.411885	0.000195	0.3572	0.000115314	0.594121
logistic regression model	s__Treponema_SGB96725	k__Bacteria|p__Spirochaetes|c__Spirochaetia|o__Spirochaetales|f__Treponemataceae|g__Treponema|s__Treponema_SGB96725	7.30212e-05	0.410564	6.56e-05	0.3073	0.000111448	0.594636
logistic regression model	s__Candidatus_Absconditabacteria_unclassified_SGB6895	k__Bacteria|p__Candidatus_Absconditabacteria|c__Candidatus_Absconditabacteria_unclassified|o__Candidatus_Absconditabacteria_unclassified|f__Candidatus_Absconditabacteria_unclassified|g__Candidatus_Absconditabacteria_unclassified|s__Candidatus_Absconditabacteria_unclassified_SGB6895	0.000340292	0.408163	0.000329	0.3614	0.000107422	0.405364
logistic regression model	s__Campylobacter_SGB19323	k__Bacteria|p__Proteobacteria|c__Epsilonproteobacteria|o__Campylobacterales|f__Campylobacteraceae|g__Campylobacter|s__Campylobacter_SGB19323	1.61566e-05	0.406963	1.74e-05	0.3352	4.513e-06	0.407942
logistic regression model	s__Actinomyces_sp_oral_taxon_414	k__Bacteria|p__Actinobacteria|c__Actinomycetia|o__Actinomycetales|f__Actinomycetaceae|g__Actinomyces|s__Actinomyces_sp_oral_taxon_414	5.49632e-05	0.405162	0.000112	0.4411	6.29589e-06	0.189789
logistic regression model	s__Campylobacter_SGB19314	k__Bacteria|p__Proteobacteria|c__Epsilonproteobacteria|o__Campylobacterales|f__Campylobacteraceae|g__Campylobacter|s__Campylobacter_SGB19314	8.32255e-05	0.401921	9.02e-05	0.3214	2.27058e-05	0.37442
logistic regression model	s__Actinomyces_sp_HMT897	k__Bacteria|p__Actinobacteria|c__Actinomycetia|o__Actinomycetales|f__Actinomycetaceae|g__Actinomyces|s__Actinomyces_sp_HMT897	6.29583e-05	0.401681	0.000124	0.431	3.70668e-06	0.116039
logistic regression model	s__Aggregatibacter_SGB9728	k__Bacteria|p__Proteobacteria|c__Gammaproteobacteria|o__Pasteurellales|f__Pasteurellaceae|g__Aggregatibacter|s__Aggregatibacter_SGB9728	6.12724e-05	0.401321	8.17e-05	0.3532	5.89773e-05	0.528623
logistic regression model	s__GGB1845_SGB2533	k__Bacteria|p__Bacteroidetes|c__Flavobacteriia|o__Flavobacteriales|f__Weeksellaceae|g__GGB1845|s__GGB1845_SGB2533	3.48786e-05	0.39952	4.39e-05	0.2991	4.27267e-05	0.51934
logistic regression model	s__Streptococcus_rubneri	k__Bacteria|p__Firmicutes|c__Bacilli|o__Lactobacillales|f__Streptococcaceae|g__Streptococcus|s__Streptococcus_rubneri	0.000518125	0.398559	0.000815	0.3847	0.000647565	0.599278
logistic regression model	s__Prevotella_fusca	k__Bacteria|p__Bacteroidetes|c__Bacteroidia|o__Bacteroidales|f__Prevotellaceae|g__Prevotella|s__Prevotella_fusca	0.000366408	0.396639	0.000478	0.4044	0.000147127	0.4131
logistic regression model	s__Campylobacter_SGB19298	k__Bacteria|p__Proteobacteria|c__Epsilonproteobacteria|o__Campylobacterales|f__Campylobacteraceae|g__Campylobacter|s__Campylobacter_SGB19298	2.11239e-05	0.395198	3.62e-05	0.3752	8.68607e-06	0.250645
logistic regression model	g__Centipeda	k__Bacteria|p__Firmicutes|c__Negativicutes|o__Selenomonadales|f__Selenomonadaceae|g__Centipeda	2.77062e-05	0.395078	3.5e-05	0.3221	5.70294e-06	0.202682
logistic regression model	s__Pauljensenia_hongkongensis	k__Bacteria|p__Actinobacteria|c__Actinomycetia|o__Actinomycetales|f__Actinomycetaceae|g__Pauljensenia|s__Pauljensenia_hongkongensis	2.97789e-05	0.394358	4.04e-05	0.3352	6.5933e-06	0.246003
logistic regression model	s__Schaalia_cardiffensis	k__Bacteria|p__Actinobacteria|c__Actinomycetia|o__Actinomycetales|f__Actinomycetaceae|g__Schaalia|s__Schaalia_cardiffensis	2.07745e-05	0.394238	2.51e-05	0.2955	4.0577e-06	0.273853
logistic regression model	s__Lautropia_dentalis	k__Bacteria|p__Proteobacteria|c__Betaproteobacteria|o__Burkholderiales|f__Burkholderiaceae|g__Lautropia|s__Lautropia_dentalis	0.000305634	0.393637	0.000616	0.3975	0.000123245	0.604951
logistic regression model	s__Kingella_bonacorsii	k__Bacteria|p__Proteobacteria|c__Betaproteobacteria|o__Neisseriales|f__Neisseriaceae|g__Kingella|s__Kingella_bonacorsii	6.72154e-05	0.385954	0.000118	0.3604	4.75912e-05	0.600825
logistic regression model	s__Streptococcus_vestibularis	k__Bacteria|p__Firmicutes|c__Bacilli|o__Lactobacillales|f__Streptococcaceae|g__Streptococcus|s__Streptococcus_vestibularis	0.000209797	0.384994	0.000537	0.3319	6.34864e-05	0.671996
logistic regression model	s__GGB72533_SGB99881	k__Bacteria|p__Proteobacteria|c__Betaproteobacteria|o__Neisseriales|f__Neisseriaceae|g__GGB72533|s__GGB72533_SGB99881	0.000150892	0.384874	0.000134	0.3375	0.000192334	0.474471
logistic regression model	g__GGB4308	k__Bacteria|p__Firmicutes|c__Negativicutes|o__Selenomonadales|f__Selenomonadaceae|g__GGB4308	0.000263624	0.383073	0.000269	0.3263	0.000109234	0.210418
logistic regression model	s__GGB3385_SGB4471	k__Bacteria|p__Firmicutes|c__Clostridia|o__Eubacteriales|f__Lachnospiraceae|g__GGB3385|s__GGB3385_SGB4471	0.000211153	0.378031	0.000243	0.3293	0.00037797	0.536875
logistic regression model	s__Catonella_SGB4501	k__Bacteria|p__Firmicutes|c__Clostridia|o__Eubacteriales|f__Lachnospiraceae|g__Catonella|s__Catonella_SGB4501	0.000105202	0.373349	0.000124	0.3319	0.000258666	0.662713
logistic regression model	s__Desulfomicrobium_orale	k__Bacteria|p__Proteobacteria|c__Deltaproteobacteria|o__Desulfovibrionales|f__Desulfomicrobiaceae|g__Desulfomicrobium|s__Desulfomicrobium_orale	0.000241428	0.368788	0.00052	0.4155	1.58347e-05	0.124291
logistic regression model	s__GGB2671_SGB3598	k__Bacteria|p__Spirochaetes|c__CFGB1021|o__OFGB1021|f__FGB1021|g__GGB2671|s__GGB2671_SGB3598	0.000155476	0.368547	0.000275	0.3732	3.01929e-05	0.268695
logistic regression model	s__Scardovia_wiggsiae	k__Bacteria|p__Actinobacteria|c__Actinomycetia|o__Bifidobacteriales|f__Bifidobacteriaceae|g__Scardovia|s__Scardovia_wiggsiae	0.000108925	0.367827	0.000169	0.2912	2.10636e-05	0.265601
logistic regression model	g__GGB4303	k__Bacteria|p__Firmicutes|c__Negativicutes|o__Selenomonadales|f__Selenomonadaceae|g__GGB4303	1.48479e-05	0.366747	2.19e-05	0.3204	4.53607e-06	0.284683
logistic regression model	s__Treponema_sp_Marseille_Q3903	k__Bacteria|p__Spirochaetes|c__Spirochaetia|o__Spirochaetales|f__Treponemataceae|g__Treponema|s__Treponema_sp_Marseille_Q3903	4.40056e-05	0.365906	5.14e-05	0.3368	3.37161e-06	0.133058
logistic regression model	s__GGB4733_SGB6557	k__Bacteria|p__Tenericutes|c__CFGB1781|o__OFGB1781|f__FGB1781|g__GGB4733|s__GGB4733_SGB6557	4.33241e-05	0.364706	5.75e-05	0.3217	3.12842e-06	0.145952
logistic regression model	g__Atopobium	k__Bacteria|p__Actinobacteria|c__Coriobacteriia|o__Coriobacteriales|f__Atopobiaceae|g__Atopobium	7.24668e-05	0.364466	9.8e-05	0.309	1.86499e-06	0.0711707
logistic regression model	s__TM7_phylum_sp_oral_taxon_349	k__Bacteria|p__Candidatus_Saccharibacteria|c__Candidatus_Saccharibacteria_unclassified|o__Candidatus_Saccharibacteria_unclassified|f__Candidatus_Saccharibacteria_unclassified|g__Candidatus_Saccharibacteria_unclassified|s__TM7_phylum_sp_oral_taxon_349	5.06407e-05	0.361345	8.53e-05	0.3204	7.26345e-06	0.188757
logistic regression model	s__GGB10852_SGB17523	k__Bacteria|p__Synergistetes|c__Synergistia|o__Synergistales|f__Synergistaceae|g__GGB10852|s__GGB10852_SGB17523	3.43627e-05	0.357263	5.25e-05	0.366	3.92667e-06	0.148014
logistic regression model	g__GGB6675	k__Bacteria|p__Proteobacteria|c__Betaproteobacteria|o__Neisseriales|f__Neisseriaceae|g__GGB6675	0.000105371	0.354022	0.000148	0.3076	5.03111e-05	0.455389
logistic regression model	s__Treponema_SGB69452	k__Bacteria|p__Spirochaetes|c__Spirochaetia|o__Spirochaetales|f__Treponemataceae|g__Treponema|s__Treponema_SGB69452	6.17674e-05	0.351981	9.74e-05	0.3254	1.17405e-05	0.221248
logistic regression model	g__Peptidiphaga	k__Bacteria|p__Actinobacteria|c__Actinomycetia|o__Actinomycetales|f__Actinomycetaceae|g__Peptidiphaga	4.89966e-05	0.34994	8.47e-05	0.3414	4.56973e-06	0.166065
logistic regression model	s__Veillonella_sp_CHU110	k__Bacteria|p__Firmicutes|c__Negativicutes|o__Veillonellales|f__Veillonellaceae|g__Veillonella|s__Veillonella_sp_CHU110	6.47336e-05	0.348499	7.16e-05	0.2581	1.85823e-05	0.200619
logistic regression model	s__GGB4733_SGB6556	k__Bacteria|p__Tenericutes|c__CFGB1781|o__OFGB1781|f__FGB1781|g__GGB4733|s__GGB4733_SGB6556	0.00022619	0.347059	0.000272	0.3168	5.55372e-05	0.445075
logistic regression model	s__Candidatus_Gracilibacteria_bacterium_GN02_872	k__Bacteria|p__Candidatus_Gracilibacteria|c__Candidatus_Gracilibacteria_unclassified|o__Candidatus_Gracilibacteria_unclassified|f__Candidatus_Gracilibacteria_unclassified|g__Candidatus_Gracilibacteria_unclassified|s__Candidatus_Gracilibacteria_bacterium_GN02_872	4.93545e-05	0.339616	6.1e-05	0.2834	9.48661e-06	0.206808
logistic regression model	o__Desulfobacterales	k__Bacteria|p__Proteobacteria|c__Deltaproteobacteria|o__Desulfobacterales	4.74991e-05	0.338896	6.88e-05	0.3326	5.46155e-06	0.161939
logistic regression model	f__Desulfovibrionaceae	k__Bacteria|p__Proteobacteria|c__Deltaproteobacteria|o__Desulfovibrionales|f__Desulfovibrionaceae	4.33468e-05	0.336255	6.95e-05	0.3316	1.08518e-05	0.112429
logistic regression model	f__Lactobacillaceae	k__Bacteria|p__Firmicutes|c__Bacilli|o__Lactobacillales|f__Lactobacillaceae	0.000883043	0.336134	0.00116	0.349	1.24811e-05	0.082001
logistic regression model	g__Bifidobacterium	k__Bacteria|p__Actinobacteria|c__Actinomycetia|o__Bifidobacteriales|f__Bifidobacteriaceae|g__Bifidobacterium	0.000222264	0.335294	0.000331	0.2975	2.59412e-05	0.0433213
logistic regression model	g__GGB12788	k__Bacteria|p__Candidatus_Saccharibacteria|c__Candidatus_Saccharibacteria_unclassified|o__Candidatus_Saccharibacteria_unclassified|f__Candidatus_Saccharibacteria_unclassified|g__GGB12788	8.33674e-05	0.335174	0.000162	0.3467	2.29126e-05	0.298092
logistic regression model	s__Alloprevotella_SGB1463	k__Bacteria|p__Bacteroidetes|c__Bacteroidia|o__Bacteroidales|f__Prevotellaceae|g__Alloprevotella|s__Alloprevotella_SGB1463	0.000661042	0.334814	0.000656	0.263	0.000501808	0.320268
logistic regression model	s__Arachnia_propionica	k__Bacteria|p__Actinobacteria|c__Actinomycetia|o__Propionibacteriales|f__Propionibacteriaceae|g__Arachnia|s__Arachnia_propionica	1.78895e-05	0.334094	3.04e-05	0.3231	6.36539e-06	0.270242
logistic regression model	s__Actinomyces_bouchesdurhonensis	k__Bacteria|p__Actinobacteria|c__Actinomycetia|o__Actinomycetales|f__Actinomycetaceae|g__Actinomyces|s__Actinomyces_bouchesdurhonensis	0.000843779	0.333854	0.000793	0.3001	0.000486455	0.375967
logistic regression model	s__GGB4533_SGB6245	k__Bacteria|p__Firmicutes|c__CFGB1762|o__OFGB1762|f__FGB1762|g__GGB4533|s__GGB4533_SGB6245	7.14592e-05	0.333373	7.01e-05	0.2686	4.13605e-05	0.399175
logistic regression model	s__Candidatus_Nanosynbacter_SGB96076	k__Bacteria|p__Candidatus_Saccharibacteria|c__Candidatus_Saccharimonia|o__Candidatus_Nanosynbacterales|f__Candidatus_Nanosynbacteraceae|g__Candidatus_Nanosynbacter|s__Candidatus_Nanosynbacter_SGB96076	1.46577e-05	0.321849	1.34e-05	0.242	2.346e-06	0.179474
logistic regression model	s__Veillonella_sp_3627	k__Bacteria|p__Firmicutes|c__Negativicutes|o__Veillonellales|f__Veillonellaceae|g__Veillonella|s__Veillonella_sp_3627	0.000262736	0.321729	0.000275	0.2998	0.00047252	0.462094
logistic regression model	s__Selenomonas_timonae	k__Bacteria|p__Firmicutes|c__Negativicutes|o__Selenomonadales|f__Selenomonadaceae|g__Selenomonas|s__Selenomonas_timonae	1.1612e-05	0.321128	1.34e-05	0.243	4.79735e-06	0.158845
logistic regression model	s__Arachnia_SGB15899	k__Bacteria|p__Actinobacteria|c__Actinomycetia|o__Propionibacteriales|f__Propionibacteriaceae|g__Arachnia|s__Arachnia_SGB15899	3.24582e-05	0.320048	3.81e-05	0.2653	8.23059e-06	0.24394
logistic regression model	s__Olsenella_phocaeensis	k__Bacteria|p__Actinobacteria|c__Coriobacteriia|o__Coriobacteriales|f__Atopobiaceae|g__Olsenella|s__Olsenella_phocaeensis	2.91083e-05	0.319808	2.72e-05	0.2335	1.29076e-06	0.0577617
logistic regression model	g__GGB7107	k__Bacteria|p__Proteobacteria|c__CFGB76657|o__OFGB76657|f__FGB76657|g__GGB7107	0.00686288	0.318487	0.00639	0.2847	0.00411417	0.253223
logistic regression model	s__Candidatus_Saccharibacteria_unclassified_SGB95587	k__Bacteria|p__Candidatus_Saccharibacteria|c__Candidatus_Saccharibacteria_unclassified|o__Candidatus_Saccharibacteria_unclassified|f__Candidatus_Saccharibacteria_unclassified|g__Candidatus_Saccharibacteria_unclassified|s__Candidatus_Saccharibacteria_unclassified_SGB95587	2.02929e-05	0.317167	1.99e-05	0.242	4.0784e-05	0.693141
logistic regression model	s__GGB6813_SGB99807	k__Bacteria|p__Proteobacteria|c__Gammaproteobacteria|o__Pasteurellales|f__Pasteurellaceae|g__GGB6813|s__GGB6813_SGB99807	2.77172e-05	0.316807	3.24e-05	0.2463	6.23025e-06	0.197009
logistic regression model	s__Bifidobacterium_dentium	k__Bacteria|p__Actinobacteria|c__Actinomycetia|o__Bifidobacteriales|f__Bifidobacteriaceae|g__Bifidobacterium|s__Bifidobacterium_dentium	0.000105373	0.313926	0.000183	0.2725	2.15924e-06	0.0309438
logistic regression model	s__Leptotrichia_sp_oral_taxon_847	k__Bacteria|p__Fusobacteria|c__Fusobacteriia|o__Fusobacteriales|f__Leptotrichiaceae|g__Leptotrichia|s__Leptotrichia_sp_oral_taxon_847	2.87914e-05	0.308643	2.87e-05	0.2519	1.13409e-06	0.122744
logistic regression model	g__Desulfovibrio	k__Bacteria|p__Proteobacteria|c__Deltaproteobacteria|o__Desulfovibrionales|f__Desulfovibrionaceae|g__Desulfovibrio	3.86389e-05	0.307683	6.63e-05	0.3152	7.84412e-06	0.109335
logistic regression model	s__Bulleidia_extructa	k__Bacteria|p__Firmicutes|c__Erysipelotrichia|o__Erysipelotrichales|f__Erysipelotrichaceae|g__Bulleidia|s__Bulleidia_extructa	2.8477e-05	0.30108	2.59e-05	0.2063	1.3581e-05	0.307375
logistic regression model	s__Selenomonas_SGB5891	k__Bacteria|p__Firmicutes|c__Negativicutes|o__Selenomonadales|f__Selenomonadaceae|g__Selenomonas|s__Selenomonas_SGB5891	2.02013e-05	0.29988	2.27e-05	0.2424	3.70836e-06	0.164002
logistic regression model	s__Cryptobacterium_curtum	k__Bacteria|p__Actinobacteria|c__Coriobacteriia|o__Eggerthellales|f__Eggerthellaceae|g__Cryptobacterium|s__Cryptobacterium_curtum	4.51397e-05	0.29928	4.37e-05	0.2201	5.64292e-06	0.0665291
logistic regression model	s__Mitsuokella_sp_oral_taxon_131	k__Bacteria|p__Firmicutes|c__Negativicutes|o__Selenomonadales|f__Selenomonadaceae|g__Mitsuokella|s__Mitsuokella_sp_oral_taxon_131	3.04043e-05	0.292317	4.09e-05	0.2345	1.11794e-06	0.0453842
logistic regression model	s__Cardiobacterium_SGB9419	k__Bacteria|p__Proteobacteria|c__Gammaproteobacteria|o__Cardiobacteriales|f__Cardiobacteriaceae|g__Cardiobacterium|s__Cardiobacterium_SGB9419	2.44073e-05	0.291837	3.91e-05	0.2663	5.79947e-06	0.204745
logistic regression model	g__GGB4393	k__Bacteria|p__Fusobacteria|c__Fusobacteriia|o__Fusobacteriales|f__Leptotrichiaceae|g__GGB4393	0.000104903	0.291236	0.000116	0.2217	8.07769e-06	0.121712
logistic regression model	s__Parascardovia_denticolens	k__Bacteria|p__Actinobacteria|c__Actinomycetia|o__Bifidobacteriales|f__Bifidobacteriaceae|g__Parascardovia|s__Parascardovia_denticolens	6.11533e-05	0.291116	9.93e-05	0.2578	6.04563e-07	0.024755
logistic regression model	s__Peptostreptococcaceae_unclassified_SGB6622	k__Bacteria|p__Firmicutes|c__Clostridia|o__Eubacteriales|f__Peptostreptococcaceae|g__Peptostreptococcaceae_unclassified|s__Peptostreptococcaceae_unclassified_SGB6622	1.53037e-05	0.288475	2.4e-05	0.2473	8.18405e-06	0.353791
logistic regression model	g__GGB12789	k__Bacteria|p__Candidatus_Saccharibacteria|c__Candidatus_Saccharibacteria_unclassified|o__Candidatus_Saccharibacteria_unclassified|f__Candidatus_Saccharibacteria_unclassified|g__GGB12789	4.65504e-05	0.287875	7.36e-05	0.2624	1.08956e-05	0.185147
logistic regression model	s__Treponema_putidum	k__Bacteria|p__Spirochaetes|c__Spirochaetia|o__Spirochaetales|f__Treponemataceae|g__Treponema|s__Treponema_putidum	1.72586e-05	0.287635	3.16e-05	0.2922	3.16092e-07	0.0355854
logistic regression model	s__Propionibacterium_acidifaciens	k__Bacteria|p__Actinobacteria|c__Actinomycetia|o__Propionibacteriales|f__Propionibacteriaceae|g__Propionibacterium|s__Propionibacterium_acidifaciens	3.87755e-05	0.285234	6.47e-05	0.2443	2.43158e-06	0.0747808
logistic regression model	s__Treponema_medium	k__Bacteria|p__Spirochaetes|c__Spirochaetia|o__Spirochaetales|f__Treponemataceae|g__Treponema|s__Treponema_medium	1.96924e-05	0.282473	3.4e-05	0.2565	6.11388e-06	0.172254
logistic regression model	s__GGB12761_SGB19791	k__Bacteria|p__Candidatus_Saccharibacteria|c__Candidatus_Saccharibacteria_unclassified|o__Candidatus_Saccharibacteria_unclassified|f__Candidatus_Saccharibacteria_unclassified|g__GGB12761|s__GGB12761_SGB19791	2.84606e-05	0.282113	3.34e-05	0.2309	1.03567e-05	0.265085
logistic regression model	s__GGB49434_SGB69353	k__Bacteria|p__Candidatus_Saccharibacteria|c__Candidatus_Saccharibacteria_unclassified|o__Candidatus_Saccharibacteria_unclassified|f__Candidatus_Saccharibacteria_unclassified|g__GGB49434|s__GGB49434_SGB69353	2.52532e-05	0.281993	3.74e-05	0.2181	7.77049e-06	0.281073
logistic regression model	s__Arachnia_SGB15898	k__Bacteria|p__Actinobacteria|c__Actinomycetia|o__Propionibacteriales|f__Propionibacteriaceae|g__Arachnia|s__Arachnia_SGB15898	2.12472e-05	0.281513	2.53e-05	0.2279	1.12321e-05	0.340382
logistic regression model	f__FGB76096	k__Bacteria|p__Firmicutes|c__CFGB76096|o__OFGB76096|f__FGB76096	1.79861e-05	0.280792	2.33e-05	0.224	7.8329e-06	0.281073
logistic regression model	s__Treponema_maltophilum	k__Bacteria|p__Spirochaetes|c__Spirochaetia|o__Spirochaetales|f__Treponemataceae|g__Treponema|s__Treponema_maltophilum	1.24853e-05	0.279592	2.01e-05	0.2581	1.43325e-06	0.09541
logistic regression model	g__GGB1186	k__Bacteria|p__Bacteroidetes|c__Bacteroidia|o__Bacteroidales|f__Prevotellaceae|g__GGB1186	0.000190914	0.279352	0.00024	0.2404	0.000105111	0.225374
logistic regression model	s__Capnocytophaga_sp_oral_taxon_338	k__Bacteria|p__Bacteroidetes|c__Flavobacteriia|o__Flavobacteriales|f__Flavobacteriaceae|g__Capnocytophaga|s__Capnocytophaga_sp_oral_taxon_338	1.45377e-05	0.27443	1.99e-05	0.1899	8.27531e-06	0.401753
logistic regression model	o__OFGB72483	k__Bacteria|p__Bacteroidetes|c__CFGB72483|o__OFGB72483	0.000106158	0.266387	0.000153	0.2457	2.98573e-05	0.230015
logistic regression model	s__Leptotrichia_trevisanii	k__Bacteria|p__Fusobacteria|c__Fusobacteriia|o__Fusobacteriales|f__Leptotrichiaceae|g__Leptotrichia|s__Leptotrichia_trevisanii	2.22247e-05	0.266146	3.64e-05	0.2086	4.06108e-06	0.230531
logistic regression model	s__Peptidiphaga_SGB15895	k__Bacteria|p__Actinobacteria|c__Actinomycetia|o__Actinomycetales|f__Actinomycetaceae|g__Peptidiphaga|s__Peptidiphaga_SGB15895	2.25026e-05	0.265186	3.72e-05	0.2568	3.54197e-06	0.14853
logistic regression model	s__Campylobacter_gracilis	k__Bacteria|p__Proteobacteria|c__Epsilonproteobacteria|o__Campylobacterales|f__Campylobacteraceae|g__Campylobacter|s__Campylobacter_gracilis	6.71772e-06	0.264706	1.06e-05	0.2273	2.05593e-06	0.187726
logistic regression model	s__Mycoplasma_salivarium	k__Bacteria|p__Tenericutes|c__Mollicutes|o__Mycoplasmatales|f__Mycoplasmataceae|g__Mycoplasma|s__Mycoplasma_salivarium	5.55927e-05	0.257863	7.48e-05	0.1988	1.01767e-05	0.244972
logistic regression model	s__Desulfovibrio_sp_OH1186_COT_070	k__Bacteria|p__Proteobacteria|c__Deltaproteobacteria|o__Desulfovibrionales|f__Desulfovibrionaceae|g__Desulfovibrio|s__Desulfovibrio_sp_OH1186_COT_070	2.73464e-05	0.257743	4.85e-05	0.2588	1.81666e-06	0.0928314
logistic regression model	s__Fusobacterium_massiliense	k__Bacteria|p__Fusobacteria|c__Fusobacteriia|o__Fusobacteriales|f__Fusobacteriaceae|g__Fusobacterium|s__Fusobacterium_massiliense	8.14255e-05	0.256423	8.57e-05	0.2217	2.18791e-05	0.139763
logistic regression model	s__Pyramidobacter_piscolens	k__Bacteria|p__Synergistetes|c__Synergistia|o__Synergistales|f__Synergistaceae|g__Pyramidobacter|s__Pyramidobacter_piscolens	2.38211e-05	0.256423	3.57e-05	0.2053	1.07486e-06	0.043837
logistic regression model	s__Veillonella_SGB6928	k__Bacteria|p__Firmicutes|c__Negativicutes|o__Veillonellales|f__Veillonellaceae|g__Veillonella|s__Veillonella_SGB6928	0.000171649	0.255822	0.000204	0.2286	7.48113e-05	0.149046
logistic regression model	s__Atopobium_sp_oral_taxon_810	k__Bacteria|p__Actinobacteria|c__Coriobacteriia|o__Coriobacteriales|f__Atopobiaceae|g__Atopobium|s__Atopobium_sp_oral_taxon_810	2.40073e-05	0.255342	3.78e-05	0.1991	1.00015e-06	0.0536359
logistic regression model	s__GGB9835_SGB15485	k__Bacteria|p__Actinobacteria|c__Actinomycetia|o__Actinomycetales|f__Actinomycetaceae|g__GGB9835|s__GGB9835_SGB15485	4.26334e-05	0.252821	5.38e-05	0.205	4.53924e-05	0.372357
logistic regression model	s__Candidatus_Saccharibacteria_unclassified_SGB95617	k__Bacteria|p__Candidatus_Saccharibacteria|c__Candidatus_Saccharibacteria_unclassified|o__Candidatus_Saccharibacteria_unclassified|f__Candidatus_Saccharibacteria_unclassified|g__Candidatus_Saccharibacteria_unclassified|s__Candidatus_Saccharibacteria_unclassified_SGB95617	4.9263e-06	0.251861	4.62e-06	0.1748	1.61804e-05	0.671996
logistic regression model	s__GGB70967_SGB95921	k__Bacteria|p__Candidatus_Saccharibacteria|c__CFGB12783|o__OFGB12783|f__FGB12783|g__GGB70967|s__GGB70967_SGB95921	0.000137134	0.248619	0.000199	0.245	1.2406e-05	0.111913
logistic regression model	g__Pseudoramibacter	k__Bacteria|p__Firmicutes|c__Clostridia|o__Eubacteriales|f__Eubacteriaceae|g__Pseudoramibacter	1.608e-05	0.247299	3.46e-05	0.2463	5.95509e-07	0.0417741
logistic regression model	s__Olsenella_profusa	k__Bacteria|p__Actinobacteria|c__Coriobacteriia|o__Coriobacteriales|f__Atopobiaceae|g__Olsenella|s__Olsenella_profusa	2.1169e-05	0.246579	3.26e-05	0.2417	3.03914e-07	0.032491
logistic regression model	s__Candidatus_Nanosynbacter_lyticus	k__Bacteria|p__Candidatus_Saccharibacteria|c__Candidatus_Saccharimonia|o__Candidatus_Nanosynbacterales|f__Candidatus_Nanosynbacteraceae|g__Candidatus_Nanosynbacter|s__Candidatus_Nanosynbacter_lyticus	2.63506e-05	0.246459	2.58e-05	0.202	2.18471e-06	0.100567
logistic regression model	s__GGB12788_SGB19838	k__Bacteria|p__Candidatus_Saccharibacteria|c__Candidatus_Saccharibacteria_unclassified|o__Candidatus_Saccharibacteria_unclassified|f__Candidatus_Saccharibacteria_unclassified|g__GGB12788|s__GGB12788_SGB19838	5.25691e-05	0.245858	0.000119	0.2483	1.84427e-05	0.220732
logistic regression model	s__GGB1844_SGB2532	k__Bacteria|p__Bacteroidetes|c__Flavobacteriia|o__Flavobacteriales|f__Weeksellaceae|g__GGB1844|s__GGB1844_SGB2532	0.00039732	0.236495	0.000594	0.2125	0.0015158	0.488396
logistic regression model	g__GGB1024	k__Bacteria|p__Bacteroidetes|c__CFGB494|o__OFGB494|f__FGB494|g__GGB1024	0.000264532	0.235774	0.00049	0.2319	5.13437e-05	0.226405
logistic regression model	s__Candidatus_Nanosynbacter_SGB19893	k__Bacteria|p__Candidatus_Saccharibacteria|c__Candidatus_Saccharimonia|o__Candidatus_Nanosynbacterales|f__Candidatus_Nanosynbacteraceae|g__Candidatus_Nanosynbacter|s__Candidatus_Nanosynbacter_SGB19893	1.78525e-05	0.235774	2.78e-05	0.205	3.65119e-06	0.129964
logistic regression model	s__Lachnoanaerobaculum_umeaense	k__Bacteria|p__Firmicutes|c__Clostridia|o__Eubacteriales|f__Lachnospiraceae|g__Lachnoanaerobaculum|s__Lachnoanaerobaculum_umeaense	2.71507e-05	0.235534	3.7e-05	0.2096	6.01655e-05	0.445591
logistic regression model	g__Isoptericola	k__Bacteria|p__Actinobacteria|c__Actinomycetia|o__Micrococcales|f__Promicromonosporaceae|g__Isoptericola	0.000426904	0.232773	0.000622	0.1965	0.000105123	0.118102
logistic regression model	g__GGB12786	k__Bacteria|p__Candidatus_Saccharibacteria|c__Candidatus_Nanosyncoccalia|o__Candidatus_Nanogingivales|f__Candidatus_Nanogingivalaceae|g__GGB12786	2.99453e-05	0.232413	4.23e-05	0.2171	1.80992e-05	0.275915
logistic regression model	s__Granulicatella_SGB8245	k__Bacteria|p__Firmicutes|c__Bacilli|o__Lactobacillales|f__Carnobacteriaceae|g__Granulicatella|s__Granulicatella_SGB8245	3.45118e-05	0.231693	3.53e-05	0.1873	5.24812e-05	0.307891
logistic regression model	s__Schaalia_odontolytica	k__Bacteria|p__Actinobacteria|c__Actinomycetia|o__Actinomycetales|f__Actinomycetaceae|g__Schaalia|s__Schaalia_odontolytica	5.85536e-05	0.231212	7.08e-05	0.1958	0.000258253	0.604951
logistic regression model	s__Oribacterium_sp_oral_taxon_102	k__Bacteria|p__Firmicutes|c__Clostridia|o__Eubacteriales|f__Lachnospiraceae|g__Oribacterium|s__Oribacterium_sp_oral_taxon_102	8.51109e-06	0.229532	8.58e-06	0.1528	5.8839e-07	0.0608561
logistic regression model	s__GGB4393_SGB6047	k__Bacteria|p__Fusobacteria|c__Fusobacteriia|o__Fusobacteriales|f__Leptotrichiaceae|g__GGB4393|s__GGB4393_SGB6047	7.84202e-05	0.228451	8.92e-05	0.1705	5.41448e-06	0.0907684
logistic regression model	s__Peptostreptococcaceae_bacterium_oral_taxon_113	k__Bacteria|p__Firmicutes|c__Clostridia|o__Eubacteriales|f__Peptostreptococcaceae|g__Peptostreptococcaceae_unclassified|s__Peptostreptococcaceae_bacterium_oral_taxon_113	2.00847e-05	0.22593	3.19e-05	0.2188	1.55083e-06	0.0639505
logistic regression model	s__GGB4533_SGB94822	k__Bacteria|p__Firmicutes|c__CFGB1762|o__OFGB1762|f__FGB1762|g__GGB4533|s__GGB4533_SGB94822	1.10704e-05	0.22557	1.24e-05	0.1942	4.60128e-07	0.0474471
logistic regression model	g__Limosilactobacillus	k__Bacteria|p__Firmicutes|c__Bacilli|o__Lactobacillales|f__Lactobacillaceae|g__Limosilactobacillus	0.000374582	0.221128	0.000373	0.222	2.89095e-06	0.0128932
logistic regression model	s__Haemophilus_paraphrohaemolyticus	k__Bacteria|p__Proteobacteria|c__Gammaproteobacteria|o__Pasteurellales|f__Pasteurellaceae|g__Haemophilus|s__Haemophilus_paraphrohaemolyticus	0.000187716	0.216206	0.000155	0.1771	0.000258938	0.353791
logistic regression model	s__Alloscardovia_omnicolens	k__Bacteria|p__Actinobacteria|c__Actinomycetia|o__Bifidobacteriales|f__Bifidobacteriaceae|g__Alloscardovia|s__Alloscardovia_omnicolens	9.77281e-05	0.215606	9.98e-05	0.1814	1.43228e-05	0.0582775
logistic regression model	s__Kingella_kingae	k__Bacteria|p__Proteobacteria|c__Betaproteobacteria|o__Neisseriales|f__Neisseriaceae|g__Kingella|s__Kingella_kingae	4.56704e-05	0.213445	4.04e-05	0.1866	7.01078e-05	0.407942
logistic regression model	g__GGB1838	k__Bacteria|p__Bacteroidetes|c__Flavobacteriia|o__Flavobacteriales|f__Flavobacteriaceae|g__GGB1838	0.000136365	0.212485	0.000144	0.2027	4.94029e-05	0.166065
logistic regression model	s__Actinomyces_sp_oral_taxon_448	k__Bacteria|p__Actinobacteria|c__Actinomycetia|o__Actinomycetales|f__Actinomycetaceae|g__Actinomyces|s__Actinomyces_sp_oral_taxon_448	5.70075e-05	0.208523	0.000107	0.2024	9.4065e-06	0.149562
logistic regression model	o__Moraxellales	k__Bacteria|p__Proteobacteria|c__Gammaproteobacteria|o__Moraxellales	8.56617e-05	0.206483	0.000123	0.2168	3.39968e-05	0.143889
logistic regression model	s__Actinomyces_massiliensis	k__Bacteria|p__Actinobacteria|c__Actinomycetia|o__Actinomycetales|f__Actinomycetaceae|g__Actinomyces|s__Actinomyces_massiliensis	1.78161e-05	0.205882	3.23e-05	0.2161	1.01877e-05	0.337803

## Sheet: ST6
Supplementary Table 6. The average relative abundances and occurrence rates of 311 tongue dorsum microbial pathways used for M-GWAS analysis across the three cohorts. “mean relative abundance” colomn means the average relative abundance of the pathway in all individuals from the cohort, while “occurrence rate” colomn means the prevalence of the pathway in all individuals. "model" colomn indicates…
			CHARLS.Discovery		CHARLS.Replication		4DSZ
model	pathway ID	pathway fullname	mean relative abundance	occurrence rate	mean relative abundance	occurrence rate	mean relative abundance	occurrence rate
linear regression model	PWY-6124	inosine-5'-phosphate biosynthesis II	0.000539162	1	0.00052	1	0.000546153	1
linear regression model	PWY-6609	adenine and adenosine salvage III	0.000509596	1	0.000502	1	0.00054487	1
linear regression model	PWY-7228	superpathway of guanosine nucleotides de novo biosynthesis I	0.00055176	1	0.000519	0.9993	0.000616127	1
linear regression model	PWY-7197	pyrimidine deoxyribonucleotide phosphorylation	0.000365894	1	0.000352	0.9993	0.000405804	1
linear regression model	PWY-7229	superpathway of adenosine nucleotides de novo biosynthesis I	0.000686991	1	0.000646	0.9993	0.000761534	1
linear regression model	PWY-7220	adenosine deoxyribonucleotides de novo biosynthesis II	0.000481835	1	0.000457	0.9993	0.000545455	1
linear regression model	DTDPRHAMSYN-PWY	dTDP-&beta;-L-rhamnose biosynthesis	0.000514297	1	0.000472	1	0.000521293	1
linear regression model	PWY-6123	inosine-5'-phosphate biosynthesis I	0.000554136	1	0.000532	1	0.000566931	1
linear regression model	PWY-7790	UMP biosynthesis II	0.000663928	1	0.000611	1	0.000687547	1
linear regression model	PWY-7221	guanosine ribonucleotides de novo biosynthesis	0.000667838	1	0.000622	1	0.000720629	1
linear regression model	COA-PWY	coenzyme A biosynthesis I (prokaryotic)	0.000613033	1	0.000562	1	0.000655	1
linear regression model	PWY-6277	superpathway of 5-aminoimidazole ribonucleotide biosynthesis	0.000539641	1	0.000528	1	0.000560337	1
linear regression model	PWY0-1586	peptidoglycan maturation (meso-diaminopimelate containing)	0.00114843	1	0.00107	0.9997	0.0012068	1
linear regression model	PWY-6121	5-aminoimidazole ribonucleotide biosynthesis I	0.000527812	1	0.000515	1	0.000546855	1
linear regression model	PWY-7208	superpathway of pyrimidine nucleobases salvage	0.000459552	1	0.000438	0.9997	0.000515389	1
linear regression model	PWY-3841	folate transformations II (plants)	0.00066183	0.999876	0.000619	1	0.000704119	1
linear regression model	PWY-6125	superpathway of guanosine nucleotides de novo biosynthesis II	0.000513509	0.999876	0.000484	0.9993	0.000575782	1
linear regression model	PANTO-PWY	phosphopantothenate biosynthesis I	0.000428717	0.999876	0.000388	1	0.000444363	1
linear regression model	PWY-6163	chorismate biosynthesis from 3-dehydroquinate	0.000646945	0.999876	0.000598	1	0.000689125	1
linear regression model	PWY0-162	superpathway of pyrimidine ribonucleotides de novo biosynthesis	0.000442805	0.999876	0.000418	0.999	0.000491626	1
linear regression model	PWY-6703	preQ0 biosynthesis	0.000415909	0.999876	0.000386	1	0.00041926	1
linear regression model	VALSYN-PWY	L-valine biosynthesis	0.000496855	0.999876	0.000496	1	0.000520768	1
linear regression model	UDPNAGSYN-PWY	UDP-N-acetyl-D-glucosamine biosynthesis I	0.000478802	0.999876	0.00047	1	0.000479789	1
linear regression model	PWY-6151	S-adenosyl-L-methionine salvage I	0.000603887	0.999876	0.000572	1	0.000641931	1
linear regression model	PWY-5941	glycogen degradation II	0.000470864	0.999753	0.000455	1	0.000511876	1
linear regression model	PWY-7663	gondoate biosynthesis (anaerobic)	0.000639314	0.999753	0.000592	1	0.000691076	1
linear regression model	THRESYN-PWY	superpathway of L-threonine biosynthesis	0.000481203	0.999753	0.000466	1	0.000518939	1
linear regression model	ILEUSYN-PWY	L-isoleucine biosynthesis I (from threonine)	0.000471353	0.999753	0.000468	1	0.000504258	1
linear regression model	PANTOSYN-PWY	superpathway of coenzyme A biosynthesis I (bacteria)	0.000492135	0.999753	0.000446	1	0.000517358	1
linear regression model	PWY-6147	6-hydroxymethyl-dihydropterin diphosphate biosynthesis I	0.000584275	0.999753	0.000525	1	0.000645927	1
linear regression model	PWY-6700	queuosine biosynthesis I (de novo)	0.000756801	0.999753	0.000685	1	0.000838959	1
linear regression model	PWY-7238	sucrose biosynthesis II	0.000485157	0.999753	0.000472	1	0.000546739	1
linear regression model	PWY-1042	glycolysis IV	0.000528069	0.999753	0.000493	0.9997	0.000582339	1
linear regression model	PWY-7234	inosine-5'-phosphate biosynthesis III	0.000395018	0.999753	0.000393	1	0.0004184	1
linear regression model	PWY-5103	L-isoleucine biosynthesis III	0.000444621	0.999753	0.000441	1	0.000478832	1
linear regression model	PWY-6387	UDP-N-acetylmuramoyl-pentapeptide biosynthesis I (meso-diaminopimelate containing)	0.000689199	0.999753	0.000643	1	0.000732574	1
linear regression model	PWY-5695	inosine 5'-phosphate degradation	0.00058487	0.999753	0.000561	1	0.000633061	1
linear regression model	PWY-5097	L-lysine biosynthesis VI	0.000520782	0.999753	0.000485	0.9997	0.000547314	1
linear regression model	ARO-PWY	chorismate biosynthesis I	0.000587596	0.999753	0.000554	1	0.000619366	1
linear regression model	COA-PWY-1	superpathway of coenzyme A biosynthesis III (mammals)	0.000547558	0.999753	0.000519	1	0.00057583	1
linear regression model	PWY-6936	seleno-amino acid biosynthesis (plants)	0.00047412	0.999753	0.000474	1	0.000503179	1
linear regression model	PWY-6385	peptidoglycan biosynthesis III (mycobacteria)	0.000713976	0.999753	0.000664	1	0.000762517	1
linear regression model	PWY-7851	coenzyme A biosynthesis II (eukaryotic)	0.000608976	0.999753	0.000558	1	0.000650506	1
linear regression model	NONOXIPENT-PWY	pentose phosphate pathway (non-oxidative branch) I	0.000373052	0.999753	0.00036	1	0.00039594	1
linear regression model	PWY-724	superpathway of L-lysine, L-threonine and L-methionine biosynthesis II	0.000481862	0.999629	0.000458	0.9997	0.000511195	1
linear regression model	ARGSYN-PWY	L-arginine biosynthesis I (via L-ornithine)	0.000338996	0.999629	0.000329	0.9986	0.000350159	1
linear regression model	PWY-7111	pyruvate fermentation to isobutanol (engineered)	0.000512104	0.999629	0.000512	1	0.000529248	1
linear regression model	PENTOSE-P-PWY	pentose phosphate pathway	0.0003425	0.999629	0.000333	1	0.000365375	1
linear regression model	PWY-6317	D-galactose degradation I (Leloir pathway)	0.000197188	0.999629	0.000205	0.9993	0.000246207	1
linear regression model	PWY0-1319	CDP-diacylglycerol biosynthesis II	0.000579401	0.999629	0.000543	0.9997	0.00058659	1
linear regression model	PWY-8178	pentose phosphate pathway (non-oxidative branch) II	0.000409337	0.999629	0.000389	1	0.000438142	1
linear regression model	PWY-7199	pyrimidine deoxyribonucleosides salvage	0.000420819	0.999629	0.000379	1	0.000483272	1
linear regression model	PWY-5973	cis-vaccenate biosynthesis	0.000666907	0.999629	0.000616	1	0.00071358	1
linear regression model	GLUTORN-PWY	L-ornithine biosynthesis I	0.000252028	0.999629	0.000243	0.9986	0.000240761	1
linear regression model	PWY-5100	pyruvate fermentation to acetate and lactate II	0.000251662	0.999629	0.000268	1	0.000215094	1
linear regression model	PWY66-429	fatty acid biosynthesis initiation (mitochondria)	0.000576197	0.999629	0.00055	1	0.000601885	1
linear regression model	GLYCOGENSYNTH-PWY	glycogen biosynthesis I (from ADP-D-Glucose)	0.000332148	0.999629	0.000329	1	0.000336249	1
linear regression model	HEME-BIOSYNTHESIS-II	heme b biosynthesis I (aerobic)	0.00030712	0.999505	0.000287	0.9993	0.00033376	1
linear regression model	ANAEROFRUCAT-PWY	homolactic fermentation	0.000332111	0.999505	0.000325	0.999	0.000347569	1
linear regression model	PWY-8187	L-arginine degradation XIII (reductive Stickland reaction)	6.58167e-05	0.999505	7.44e-05	0.9993	6.39281e-05	1
linear regression model	COMPLETE-ARO-PWY	superpathway of aromatic amino acid biosynthesis	0.000600248	0.999505	0.000566	1	0.000634257	1
linear regression model	PWY-7282	4-amino-2-methyl-5-diphosphomethylpyrimidine biosynthesis II	0.00024692	0.999505	0.000239	0.9986	0.000292573	1
linear regression model	PWY-3001	superpathway of L-isoleucine biosynthesis I	0.000465336	0.999505	0.000452	1	0.000502752	1
linear regression model	TRNA-CHARGING-PWY	tRNA charging	0.000633124	0.999505	0.000585	1	0.000696909	1
linear regression model	NONMEVIPP-PWY	methylerythritol phosphate pathway I	0.000621865	0.999505	0.000558	0.9997	0.000673896	1
linear regression model	GLUCONEO-PWY	gluconeogenesis I	0.000343464	0.999505	0.00032	0.999	0.000397743	1
linear regression model	PWY0-862	(5Z)-dodecenoate biosynthesis I	0.000475805	0.999505	0.000445	0.9997	0.000500401	1
linear regression model	ANAGLYCOLYSIS-PWY	glycolysis III (from glucose)	0.000577376	0.999505	0.000541	1	0.000614418	1
linear regression model	SER-GLYSYN-PWY	superpathway of L-serine and glycine biosynthesis I	0.000450573	0.999505	0.000409	1	0.000479066	1
linear regression model	PWY-5659	GDP-mannose biosynthesis	0.000173113	0.999505	0.000176	0.999	0.000199772	1
linear regression model	PWY-6527	stachyose degradation	0.000164075	0.999505	0.000159	0.9986	0.000193647	1
linear regression model	PWY-841	superpathway of purine nucleotides de novo biosynthesis I	0.000543083	0.999505	0.000518	0.9993	0.000586495	1
linear regression model	PWY-I9	L-cysteine biosynthesis VI (from L-methionine)	0.000285526	0.999505	0.000298	0.9997	0.000343585	1
linear regression model	GLYCOLYSIS	glycolysis I (from glucose 6-phosphate)	0.000422634	0.999505	0.000397	0.9993	0.000457516	1
linear regression model	PWY-5484	glycolysis II (from fructose 6-phosphate)	0.000372571	0.999505	0.000348	0.999	0.000412866	1
linear regression model	ASPASN-PWY	superpathway of L-aspartate and L-asparagine biosynthesis	0.000369872	0.999505	0.000336	0.9997	0.000420421	1
linear regression model	ARGSYNBSUB-PWY	L-arginine biosynthesis II (acetyl cycle)	0.000359347	0.999505	0.000347	0.9983	0.000361149	1
linear regression model	CALVIN-PWY	Calvin-Benson-Bassham cycle	0.000536922	0.999505	0.0005	0.9993	0.000581103	1
linear regression model	PWY-5981	CDP-diacylglycerol biosynthesis III	0.000100914	0.999505	0.000113	0.9986	8.91549e-05	1
linear regression model	DAPLYSINESYN-PWY	L-lysine biosynthesis I	0.00037607	0.999505	0.000363	0.999	0.000400084	1
linear regression model	PWY-702	L-methionine biosynthesis II	0.000275028	0.999505	0.000293	0.9997	0.000328447	1
linear regression model	PWY4FS-8	phosphatidylglycerol biosynthesis II (non-plastidic)	0.000358701	0.999505	0.000346	0.999	0.000403479	1
linear regression model	OANTIGEN-PWY	O-antigen building blocks biosynthesis (E. coli)	0.000457944	0.999382	0.000437	0.9997	0.000463709	1
linear regression model	GLCMANNANAUT-PWY	superpathway of N-acetylglucosamine, N-acetylmannosamine and N-acetylneuraminate degradation	0.000109217	0.999382	0.000113	0.9983	0.000149155	1
linear regression model	PWY-7953	UDP-N-acetylmuramoyl-pentapeptide biosynthesis III (meso-diaminopimelate containing)	0.000661998	0.999382	0.000611	0.9997	0.000710887	1
linear regression model	PWY-5989	stearate biosynthesis II (bacteria and plants)	0.000424266	0.999382	0.000392	0.9993	0.000444931	1
linear regression model	PWY-7357	thiamine phosphate formation from pyrithiamine and oxythiamine (yeast)	0.000221453	0.999382	0.000205	0.9997	0.000275827	1
linear regression model	PPGPPMET-PWY	ppGpp metabolism	0.000401686	0.999382	0.000364	0.9986	0.000444499	1
linear regression model	HISTSYN-PWY	L-histidine biosynthesis	0.000318365	0.999382	0.000304	0.9979	0.000299499	1
linear regression model	PWY-2941	L-lysine biosynthesis II	0.000147419	0.999382	0.000169	0.9997	0.000136061	1
linear regression model	HSERMETANA-PWY	L-methionine biosynthesis III	0.000303718	0.999382	0.000288	0.9997	0.00036683	1
linear regression model	PWY-6823	molybdopterin biosynthesis	0.000204807	0.999382	0.000207	0.9993	0.000235715	1
linear regression model	PWY-2942	L-lysine biosynthesis III	0.000486631	0.999382	0.000435	0.999	0.000540708	1
linear regression model	PWY-6630	superpathway of L-tyrosine biosynthesis	0.000440967	0.999382	0.000422	0.9993	0.000448435	1
linear regression model	PWY-6897	thiamine diphosphate salvage II	0.00028512	0.999382	0.000261	0.9997	0.000345165	1
linear regression model	PWY-5188	tetrapyrrole biosynthesis I (from glutamate)	0.000394443	0.999382	0.00038	0.9997	0.000418653	1
linear regression model	PWY0-1296	purine ribonucleosides degradation	0.000201182	0.999382	0.000215	1	0.000213242	1
linear regression model	TRPSYN-PWY	L-tryptophan biosynthesis	0.000441376	0.999258	0.000436	0.9997	0.000466716	1
linear regression model	PWY0-1297	superpathway of purine deoxyribonucleosides degradation	6.20383e-05	0.999258	7.19e-05	0.9983	6.22563e-05	1
linear regression model	PWY0-1477	ethanolamine utilization	7.77934e-05	0.999258	7.96e-05	0.9969	7.9384e-05	1
linear regression model	PWY-6628	superpathway of L-phenylalanine biosynthesis	0.000336307	0.999258	0.00034	0.9993	0.000345553	1
linear regression model	HEMESYN2-PWY	heme b biosynthesis II (oxygen-independent)	0.000360466	0.999258	0.000342	0.999	0.00039873	1
linear regression model	PWY-7560	methylerythritol phosphate pathway II	0.000212614	0.999258	0.00023	0.9993	0.000210082	1
linear regression model	PWY-7198	pyrimidine deoxyribonucleotides de novo biosynthesis IV	0.000121056	0.999258	0.000135	0.9983	0.000111726	1
linear regression model	HISDEG-PWY	L-histidine degradation I	0.000187491	0.999258	0.000164	0.9993	0.000195025	1
linear regression model	PHOSLIPSYN-PWY	superpathway of phospholipid biosynthesis I (bacteria)	0.000388644	0.999258	0.000345	0.9979	0.00042926	1
linear regression model	RIBOSYN2-PWY	flavin biosynthesis I (bacteria and plants)	0.000560488	0.999258	0.000503	0.9997	0.000612403	1
linear regression model	PWY-5030	L-histidine degradation III	0.000192955	0.999134	0.000171	0.999	0.000204868	1
linear regression model	PWY-6608	guanosine nucleotides degradation III	0.000201114	0.999134	0.000171	0.9993	0.000236432	1
linear regression model	P441-PWY	superpathway of N-acetylneuraminate degradation	0.000158363	0.999134	0.000161	0.9972	0.000213914	1
linear regression model	PWY-5154	L-arginine biosynthesis III (via N-acetyl-L-citrulline)	3.72403e-05	0.999134	5.03e-05	0.9941	2.56395e-05	0.99891
linear regression model	PWY-5189	tetrapyrrole biosynthesis II (from glycine)	0.000267585	0.999134	0.000249	0.999	0.000270582	1
linear regression model	PWY-7117	C4 photosynthetic carbon assimilation cycle, PEPCK type	0.000331765	0.999134	0.000315	0.9979	0.000369284	1
linear regression model	PWY-6629	superpathway of L-tryptophan biosynthesis	0.000503975	0.999134	0.000485	0.9997	0.000533973	1
linear regression model	LACTOSECAT-PWY	lactose and galactose degradation I	5.35908e-05	0.999134	6.86e-05	0.999	5.28712e-05	1
linear regression model	PWY-5918	superpathway of heme b biosynthesis from glutamate	0.000313644	0.999011	0.000294	0.9986	0.000326542	1
linear regression model	PWY0-1298	superpathway of pyrimidine deoxyribonucleosides degradation	7.55455e-05	0.999011	7.88e-05	0.9979	7.43479e-05	1
linear regression model	PWY-5121	superpathway of geranylgeranyl diphosphate biosynthesis II (via MEP)	0.000112477	0.999011	0.000124	0.9993	9.00826e-05	1
linear regression model	POLYISOPRENSYN-PWY	polyisoprenoid biosynthesis (E. coli)	7.08334e-05	0.999011	7.95e-05	0.9983	6.14015e-05	1
linear regression model	PWY-5384	sucrose degradation IV (sucrose phosphorylase)	0.000149008	0.999011	0.000139	0.9986	0.000188071	1
linear regression model	PYRIDNUCSYN-PWY	NAD de novo biosynthesis I (from aspartate)	0.000325163	0.999011	0.000284	0.9986	0.000336314	1
linear regression model	THISYNARA-PWY	superpathway of thiamine diphosphate biosynthesis III (eukaryotes)	0.000203029	0.999011	0.00018	0.9979	0.000226759	1
linear regression model	PWY-5913	partial TCA cycle (obligate autotrophs)	0.000289482	0.999011	0.00028	0.9976	0.000286593	1
linear regression model	PWY-6270	isoprene biosynthesis I	0.000228589	0.999011	0.000245	0.9979	0.000225831	1
linear regression model	PWY-241	C4 photosynthetic carbon assimilation cycle, NADP-ME type	0.000269144	0.998887	0.000244	0.9979	0.000306806	1
linear regression model	PWY-6859	all-trans-farnesol biosynthesis	4.53394e-05	0.998887	5.31e-05	0.9976	3.42022e-05	1
linear regression model	PWY-621	sucrose degradation III (sucrose invertase)	0.000150123	0.998887	0.000139	0.9969	0.000190003	1
linear regression model	1CMET2-PWY	folate transformations III (E. coli)	0.000471426	0.998887	0.000431	0.999	0.000513722	1
linear regression model	PWY0-1241	ADP-L-glycero-&beta;-D-manno-heptose biosynthesis	0.000160237	0.998763	0.000152	0.9976	0.00020828	1
linear regression model	PWY-1269	CMP-3-deoxy-D-manno-octulosonate biosynthesis	0.00032078	0.998763	0.000289	0.9962	0.000365635	1
linear regression model	PWY-4041	&gamma;-glutamyl cycle	0.00011745	0.998763	0.000125	0.9966	0.000156763	1
linear regression model	PWY-7345	superpathway of anaerobic sucrose degradation	0.000235503	0.99864	0.000231	0.9962	0.000289565	1
linear regression model	PWY-5898	superpathway of menaquinol-12 biosynthesis	0.000244291	0.99864	0.000223	0.9959	0.000302392	1
linear regression model	PWY-5837	2-carboxy-1,4-naphthoquinol biosynthesis	0.00015226	0.99864	0.000142	0.9959	0.000203788	1
linear regression model	PYRIDOXSYN-PWY	pyridoxal 5'-phosphate biosynthesis I	0.000284845	0.998516	0.000259	0.9969	0.000279886	1
linear regression model	PWY-7977	L-methionine biosynthesis IV	0.000332553	0.998516	0.000296	0.9979	0.00041003	1
linear regression model	PWY0-845	superpathway of pyridoxal 5'-phosphate biosynthesis and salvage	0.000186123	0.998516	0.000177	0.9966	0.000216524	1
linear regression model	PWY-7392	taxadiene biosynthesis (engineered)	8.53283e-05	0.998392	9.45e-05	0.9962	6.71419e-05	0.999455
linear regression model	PWY-6305	superpathway of putrescine biosynthesis	3.06845e-05	0.998392	3.23e-05	0.9955	2.8198e-05	1
linear regression model	COLANSYN-PWY	colanic acid building blocks biosynthesis	0.000206187	0.998392	0.00019	0.9979	0.000234295	1
linear regression model	PWY-7383	anaerobic energy metabolism (invertebrates, cytosol)	0.000100948	0.998269	0.000116	0.9966	9.36584e-05	1
linear regression model	PWY-7328	superpathway of UDP-glucose-derived O-antigen building blocks biosynthesis	0.000142188	0.998269	0.000144	0.9962	0.000153846	1
linear regression model	PWY66-409	superpathway of purine nucleotide salvage	0.000132907	0.998145	0.000148	0.9966	0.000133038	1
linear regression model	P42-PWY	incomplete reductive TCA cycle	0.000108897	0.998145	9.89e-05	0.9966	0.000131614	1
linear regression model	PWY-6519	8-amino-7-oxononanoate biosynthesis I	0.000149775	0.998021	0.000145	0.9948	0.000165466	1
linear regression model	MET-SAM-PWY	superpathway of S-adenosyl-L-methionine biosynthesis	0.000223087	0.998021	0.000219	0.9955	0.000264132	1
linear regression model	BIOTIN-BIOSYNTHESIS-PWY	biotin biosynthesis I	0.000164424	0.998021	0.000158	0.9948	0.000180313	1
linear regression model	METSYN-PWY	superpathway of L-homoserine and L-methionine biosynthesis	0.000216941	0.998021	0.000216	0.9955	0.00025477	1
linear regression model	P185-PWY	formaldehyde assimilation III (dihydroxyacetone cycle)	5.14292e-05	0.997898	5.81e-05	0.9969	4.7968e-05	1
linear regression model	PWY66-399	gluconeogenesis III	0.000116593	0.997774	0.000131	0.9959	0.000116323	1
linear regression model	PWY-8004	Entner-Doudoroff pathway I	0.000170032	0.997774	0.00017	0.9945	0.000198323	1
linear regression model	CITRULBIO-PWY	L-citrulline biosynthesis	5.23624e-05	0.997774	5.52e-05	0.9959	4.34478e-05	1
linear regression model	PWY-5130	2-oxobutanoate degradation I	7.31081e-05	0.997774	7.11e-05	0.9955	8.042e-05	1
linear regression model	PWY-7356	thiamine diphosphate salvage IV (yeast)	6.99729e-05	0.997774	7.17e-05	0.9945	0.000102659	1
linear regression model	PWY-5840	superpathway of menaquinol-7 biosynthesis	0.000148091	0.99765	0.000143	0.9952	0.000153777	0.999455
linear regression model	GLYCOLYSIS-E-D	superpathway of glycolysis and the Entner-Doudoroff pathway	0.000195559	0.99765	0.000193	0.9945	0.00022578	1
linear regression model	PWY-6292	superpathway of L-cysteine biosynthesis (mammalian)	4.4196e-05	0.99765	4.63e-05	0.9948	3.78662e-05	1
linear regression model	PWY-7400	L-arginine biosynthesis IV (archaebacteria)	0.00013584	0.997527	0.000158	0.9907	0.000119028	0.99891
linear regression model	PWY0-1479	tRNA processing	0.000354626	0.997403	0.000334	0.9931	0.000373783	1
linear regression model	GLYCOCAT-PWY	glycogen degradation I	8.09893e-05	0.997403	6.91e-05	0.9938	9.28015e-05	0.999455
linear regression model	PWY-6969	TCA cycle V (2-oxoglutarate synthase)	0.000118609	0.997403	0.000101	0.9952	0.000121659	1
linear regression model	PWY-6588	pyruvate fermentation to acetone	4.34171e-05	0.997156	4.41e-05	0.9962	4.2677e-05	1
linear regression model	P164-PWY	purine nucleobases degradation I (anaerobic)	7.50043e-05	0.997156	7.45e-05	0.9952	8.59495e-05	0.999455
linear regression model	PWY-5676	acetyl-CoA fermentation to butanoate II	2.37435e-05	0.997156	2.97e-05	0.9959	1.74382e-05	0.99891
linear regression model	PWY-8073	lipid IVA biosynthesis (P. putida)	0.000353112	0.996908	0.000323	0.9897	0.000383812	1
linear regression model	P161-PWY	acetylene degradation (anaerobic)	3.19426e-05	0.996908	3.55e-05	0.991	3.47455e-05	1
linear regression model	PWY0-1261	anhydromuropeptides recycling I	0.000245413	0.996785	0.000232	0.9938	0.000284072	1
linear regression model	PWY-6606	guanosine nucleotides degradation II	1.60988e-05	0.996785	1.91e-05	0.9938	1.57665e-05	1
linear regression model	METHGLYUT-PWY	superpathway of methylglyoxal degradation	2.57523e-05	0.996661	3.13e-05	0.9941	1.79656e-05	1
linear regression model	PWY-7200	superpathway of pyrimidine deoxyribonucleoside salvage	0.00023776	0.996537	0.000203	0.9924	0.000286635	1
linear regression model	PWY0-1061	superpathway of L-alanine biosynthesis	0.000291844	0.996414	0.000271	0.991	0.000340424	1
linear regression model	PWY-6803	phosphatidylcholine acyl editing	0.000232207	0.996414	0.000213	0.9914	0.000218907	1
linear regression model	PWY-7115	C4 photosynthetic carbon assimilation cycle, NAD-ME type	0.000232273	0.99629	0.000211	0.9903	0.000272956	1
linear regression model	FERMENTATION-PWY	mixed acid fermentation	0.000180809	0.99629	0.000173	0.9924	0.000256247	1
linear regression model	COBALSYN-PWY	superpathway of adenosylcobalamin salvage from cobinamide I	7.0186e-05	0.99629	5.98e-05	0.9938	7.71463e-05	0.999455
linear regression model	PWY-7761	NAD salvage pathway II (PNC IV cycle)	0.00014985	0.996166	0.000128	0.9928	0.000194883	1
linear regression model	PWY-922	mevalonate pathway I (eukaryotes and bacteria)	2.63589e-05	0.995795	3.35e-05	0.9928	2.31872e-05	1
linear regression model	PWY-5005	biotin biosynthesis II	7.29013e-05	0.995548	6.88e-05	0.9879	8.35089e-05	1
linear regression model	P122-PWY	heterolactic fermentation	4.90889e-05	0.995548	5.07e-05	0.989	6.18044e-05	1
linear regression model	PWY-5367	petroselinate biosynthesis	2.91231e-05	0.995548	3.57e-05	0.9886	2.91472e-05	1
linear regression model	PWY-6284	superpathway of unsaturated fatty acids biosynthesis (E. coli)	9.22789e-05	0.995548	0.000105	0.9886	0.000102308	1
linear regression model	PWY-5910	superpathway of geranylgeranyldiphosphate biosynthesis I (via mevalonate)	2.77374e-05	0.995424	3.4e-05	0.9917	2.28789e-05	0.999455
linear regression model	PWY-5971	palmitate biosynthesis (type II fatty acid synthase)	0.000405614	0.995424	0.000394	0.9886	0.000440962	1
linear regression model	P124-PWY	Bifidobacterium shunt	3.87508e-05	0.995301	4.41e-05	0.989	3.46363e-05	1
linear regression model	PWY-4984	urea cycle	3.7007e-05	0.995301	3.89e-05	0.9928	3.33272e-05	0.998365
linear regression model	HEME-BIOSYNTHESIS-II-1	heme b biosynthesis V (aerobic)	0.000215917	0.995053	0.000201	0.991	0.000222869	1
linear regression model	PWY-7858	(5Z)-dodecenoate biosynthesis II	0.000110172	0.994682	0.000109	0.9866	0.000168036	0.999455
linear regression model	P125-PWY	superpathway of (R,R)-butanediol biosynthesis	1.51613e-05	0.994435	2.19e-05	0.9886	9.77059e-06	0.999455
linear regression model	SO4ASSIM-PWY	assimilatory sulfate reduction I	0.000210816	0.994311	0.000194	0.9893	0.000206292	1
linear regression model	SULFATE-CYS-PWY	superpathway of sulfate assimilation and cysteine biosynthesis	0.00021002	0.994187	0.00019	0.9886	0.000240178	1
linear regression model	PWY-7013	(S)-propane-1,2-diol degradation	3.61068e-05	0.994187	3.79e-05	0.9869	3.15196e-05	0.999455
linear regression model	PWY-5345	superpathway of L-methionine biosynthesis (by sulfhydrylation)	0.000166864	0.994064	0.000162	0.9883	0.000178585	1
linear regression model	P4-PWY	superpathway of L-lysine, L-threonine and L-methionine biosynthesis I	0.000100047	0.994064	0.000109	0.9814	6.74441e-05	1
linear regression model	PWY-7883	anhydromuropeptides recycling II	0.000113141	0.99394	0.000117	0.9872	0.000119797	1
linear regression model	PWY-6901	superpathway of glucose and xylose degradation	7.13802e-05	0.99394	7.16e-05	0.9869	6.57467e-05	0.99891
linear regression model	PWY0-781	aspartate superpathway	0.000102638	0.993693	0.000111	0.9814	7.0475e-05	1
linear regression model	PWY-5920	superpathway of heme b biosynthesis from glycine	0.000204783	0.993693	0.000183	0.9869	0.000226573	1
linear regression model	PWY-5861	superpathway of demethylmenaquinol-8 biosynthesis I	0.000124531	0.993693	0.000104	0.9824	0.000146503	1
linear regression model	PWY4LZ-257	superpathway of fermentation (Chlamydomonas reinhardtii)	2.80146e-05	0.993693	2.97e-05	0.9862	3.06418e-05	1
linear regression model	P461-PWY	hexitol fermentation to lactate, formate, ethanol and acetate	2.92273e-05	0.993693	3.27e-05	0.9859	3.34378e-05	1
linear regression model	PWY3O-4107	NAD salvage pathway V (PNC V cycle)	3.22021e-05	0.993693	3.79e-05	0.9883	2.70227e-05	0.99782
linear regression model	PWY-5723	Rubisco shunt	6.97932e-05	0.993074	5.63e-05	0.9869	7.03202e-05	0.99564
linear regression model	P23-PWY	reductive TCA cycle I	7.41533e-05	0.992703	6.47e-05	0.9862	9.23684e-05	1
linear regression model	ARGININE-SYN4-PWY	L-ornithine biosynthesis II	2.68229e-05	0.992456	2.84e-05	0.9852	1.68749e-05	0.992371
linear regression model	PWY-6285	superpathway of fatty acids biosynthesis (E. coli)	0.000145301	0.992085	0.000158	0.9786	0.000166479	0.999455
linear regression model	NAD-BIOSYNTHESIS-II	NAD salvage pathway III (to nicotinamide riboside)	2.0186e-05	0.990972	2.28e-05	0.9835	2.00644e-05	0.998365
linear regression model	PYRIDNUCSAL-PWY	NAD salvage pathway I (PNC VI cycle)	3.54308e-05	0.990848	3.87e-05	0.9831	3.34467e-05	0.99782
linear regression model	PWY66-389	phytol degradation	0.000245965	0.990477	0.000225	0.98	0.000273251	1
linear regression model	RHAMCAT-PWY	L-rhamnose degradation I	8.6848e-06	0.989735	1.02e-05	0.9755	7.22295e-06	0.998365
linear regression model	PWY-7434	terminal O-glycans residues modification (via type 2 precursor disaccharide)	7.28751e-06	0.989612	1.09e-05	0.9824	5.02777e-06	0.99891
linear regression model	PWY-5855	ubiquinol-7 biosynthesis (early decarboxylation)	0.000180274	0.989241	0.000168	0.9793	0.000162991	0.999455
linear regression model	POLYAMSYN-PWY	superpathway of polyamine biosynthesis I	2.44419e-05	0.989117	2.61e-05	0.9779	1.99376e-05	0.99782
linear regression model	REDCITCYC	TCA cycle VI (Helicobacter)	2.17272e-05	0.988746	2.36e-05	0.9779	1.67005e-05	0.996185
linear regression model	P163-PWY	L-lysine fermentation to acetate and butanoate	3.04834e-05	0.987633	3.02e-05	0.9817	3.10847e-05	0.99673
linear regression model	PWY-2201	folate transformations I	0.000166133	0.987633	0.000164	0.9804	0.000207947	0.999455
linear regression model	ARG+POLYAMINE-SYN	superpathway of arginine and polyamine biosynthesis	2.94962e-05	0.987633	3.38e-05	0.9735	2.22804e-05	0.99673
linear regression model	DENITRIFICATION-PWY	nitrate reduction I (denitrification)	1.90585e-05	0.987386	1.86e-05	0.9721	1.81901e-05	0.999455
linear regression model	SALVADEHYPOX-PWY	adenosine nucleotides degradation II	1.35141e-05	0.986767	1.56e-05	0.9738	1.20787e-05	0.995095
linear regression model	PWY-6353	purine nucleotides degradation II (aerobic)	2.7476e-05	0.986767	3.1e-05	0.9738	2.51829e-05	0.995095
linear regression model	PWY-6922	L-N&delta;-acetylornithine biosynthesis	1.89505e-05	0.986396	1.99e-05	0.9783	1.32598e-05	0.989101
linear regression model	GLUCOSE1PMETAB-PWY	glucose and glucose-1-phosphate degradation	0.000352745	0.984541	0.000331	0.9669	0.000351569	0.99891
linear regression model	GOLPDLCAT-PWY	superpathway of glycerol degradation to 1,3-propanediol	1.07928e-05	0.983552	1.16e-05	0.9679	8.57956e-06	0.996185
linear regression model	PWY-8131	5'-deoxyadenosine degradation II	9.52838e-06	0.983057	1.13e-05	0.9707	5.32208e-06	0.984196
linear regression model	PWY-6612	superpathway of tetrahydrofolate biosynthesis	5.92381e-05	0.980089	6.13e-05	0.9597	7.48746e-05	0.994005
linear regression model	PWY-7456	&beta;-(1,4)-mannan degradation	3.73494e-05	0.979965	3.18e-05	0.959	3.24844e-05	0.99673
linear regression model	PWY-7371	1,4-dihydroxy-6-naphthoate biosynthesis II	1.07852e-05	0.97675	1.05e-05	0.9431	9.63903e-06	0.99455
linear regression model	PWY-6507	4-deoxy-L-threo-hex-4-enopyranuronate degradation	1.19618e-05	0.976626	1.07e-05	0.9617	8.74076e-06	0.973297
linear regression model	PWY0-1415	superpathway of heme b biosynthesis from uroporphyrinogen-III	8.74708e-05	0.976008	8.36e-05	0.9507	0.000141239	1
linear regression model	PWY-7242	D-fructuronate degradation	1.15924e-05	0.975884	1.01e-05	0.9473	8.7949e-06	0.976022
linear regression model	PWY-7992	superpathway of menaquinol-8 biosynthesis III	2.43203e-05	0.974648	2.29e-05	0.938	2.24143e-05	0.99455
linear regression model	PWY-6607	guanosine nucleotides degradation I	5.87414e-06	0.974029	6.72e-06	0.9442	6.08423e-06	0.995095
linear regression model	PWY-6595	superpathway of guanosine nucleotides degradation (plants)	6.59162e-06	0.973906	7.55e-06	0.9442	6.97555e-06	0.995095
linear regression model	PWY-5675	nitrate reduction V (assimilatory)	7.6733e-06	0.973658	1.14e-05	0.9597	4.12868e-06	0.985831
linear regression model	PWY-6892	thiazole component of thiamine diphosphate biosynthesis I	1.70143e-05	0.970319	1.62e-05	0.9366	1.73066e-05	0.995095
linear regression model	THISYN-PWY	superpathway of thiamine diphosphate biosynthesis I	6.8552e-05	0.970319	6.31e-05	0.9362	7.09655e-05	0.995095
linear regression model	PWY-6549	L-glutamine biosynthesis III	2.76069e-05	0.96834	2.49e-05	0.9297	2.51608e-05	0.987466
linear regression model	DENOVOPURINE2-PWY	superpathway of purine nucleotides de novo biosynthesis II	0.0001254	0.965991	0.000118	0.9352	0.000200841	0.99891
linear regression model	PWY-7187	pyrimidine deoxyribonucleotides de novo biosynthesis II	4.5755e-05	0.965867	4.32e-05	0.9352	7.90426e-05	0.99891
linear regression model	PWY-6748	nitrate reduction VII (denitrification)	8.97835e-06	0.961909	8.32e-06	0.9159	9.27936e-06	0.996185
linear regression model	PWY-8190	L-glutamate degradation XI (reductive Stickland reaction)	7.75979e-06	0.959436	8.91e-06	0.9373	5.7091e-06	0.983651
linear regression model	PWY-7031	protein N-glycosylation (bacterial)	7.51978e-06	0.958694	6.95e-06	0.9111	7.78372e-06	0.99346
linear regression model	GLUCUROCAT-PWY	superpathway of &beta;-D-glucuronosides degradation	1.05051e-05	0.957457	8.99e-06	0.9135	8.64669e-06	0.974387
linear regression model	PRPP-PWY	superpathway of histidine, purine, and pyrimidine biosynthesis	3.65166e-05	0.95486	3.78e-05	0.9159	2.08793e-05	0.974932
logistic regression model	PWY-6895	superpathway of thiamine diphosphate biosynthesis II	4.07071e-05	0.949161	3.84e-05	0.9035	4.00631e-05	0.992371
logistic regression model	PWY-5497	purine nucleobases degradation II (anaerobic)	5.36956e-06	0.944472	7.29e-06	0.9228	2.0488e-06	0.875204
logistic regression model	PWY1ZNC-1	assimilatory sulfate reduction IV	1.97598e-05	0.94138	1.41e-05	0.8904	2.17386e-05	0.966757
logistic regression model	PWY0-301	L-ascorbate degradation I (bacterial, anaerobic)	4.53999e-06	0.936557	4.51e-06	0.8776	7.04939e-06	0.987466
logistic regression model	PWY-622	starch biosynthesis	3.37934e-05	0.934578	3.89e-05	0.8949	4.20402e-06	0.665395
logistic regression model	PWY-821	superpathway of sulfur amino acid biosynthesis (Saccharomyces cerevisiae)	4.33505e-05	0.929013	3.27e-05	0.8618	4.6955e-05	0.962943
logistic regression model	GALACTUROCAT-PWY	D-galacturonate degradation I	9.7081e-06	0.928147	7.95e-06	0.8652	7.85097e-06	0.942779
logistic regression model	UDPNACETYLGALSYN-PWY	UDP-N-acetyl-D-glucosamine biosynthesis II	4.5379e-06	0.902795	5.55e-06	0.8432	4.69785e-06	0.976567
logistic regression model	PWY-6749	CMP-legionaminate biosynthesis I	7.41713e-06	0.895127	7.05e-06	0.8187	8.00109e-06	0.964033
logistic regression model	GLYOXYLATE-BYPASS	glyoxylate cycle	7.69077e-06	0.891912	8.57e-06	0.8632	4.33606e-06	0.87139
logistic regression model	PWY-7118	chitin deacetylation	3.1348e-06	0.865075	3.69e-06	0.8221	1.5236e-06	0.810899
logistic regression model	PWY-5265	peptidoglycan biosynthesis II (staphylococci)	1.71845e-05	0.864952	2.09e-05	0.8083	1.64638e-05	0.921526
logistic regression model	PWY-822	fructan biosynthesis	5.73928e-06	0.854563	8.24e-06	0.8542	4.47487e-06	0.895368
logistic regression model	PWY-7323	superpathway of GDP-mannose-derived O-antigen building blocks biosynthesis	4.10218e-06	0.849617	5.31e-06	0.8083	1.53712e-06	0.709537
logistic regression model	POLYAMINSYN3-PWY	superpathway of polyamine biosynthesis II	5.13062e-06	0.849369	5.56e-06	0.7925	3.3629e-06	0.752044
logistic regression model	PWY-6562	norspermidine biosynthesis	7.07399e-06	0.839105	7.54e-06	0.779	8.42021e-06	0.943324
logistic regression model	PWY-7184	pyrimidine deoxyribonucleotides de novo biosynthesis I	1.4128e-05	0.8349	1.34e-05	0.7477	2.36348e-05	0.946049
logistic regression model	PWY-6545	pyrimidine deoxyribonucleotides de novo biosynthesis III	9.48452e-06	0.834281	9.09e-06	0.7459	1.40249e-05	0.945504
logistic regression model	PWY-5505	L-glutamate and L-glutamine biosynthesis	4.96859e-06	0.83119	3.32e-06	0.6594	4.75555e-06	0.942234
logistic regression model	PWY-7211	superpathway of pyrimidine deoxyribonucleotides de novo biosynthesis	9.27702e-06	0.829582	9.35e-06	0.7387	7.67272e-06	0.93188
logistic regression model	PWY0-166	superpathway of pyrimidine deoxyribonucleotides de novo biosynthesis (E. coli)	1.36979e-05	0.828964	1.28e-05	0.7356	2.44126e-05	0.946049
logistic regression model	PWY-7254	TCA cycle VII (acetate-producers)	1.21926e-05	0.827232	1.19e-05	0.7897	8.82876e-06	0.705722
logistic regression model	PWY-6467	Kdo transfer to lipid IVA III (Chlamydia)	5.36466e-06	0.82513	7.19e-06	0.8201	1.06406e-06	0.564033
logistic regression model	GALACT-GLUCUROCAT-PWY	superpathway of hexuronide and hexuronate degradation	3.53517e-06	0.808682	2.84e-06	0.6487	3.69412e-06	0.875749
logistic regression model	P105-PWY	TCA cycle IV (2-oxoglutarate decarboxylase)	3.56693e-06	0.792233	3.54e-06	0.687	2.91659e-06	0.835967
logistic regression model	PWY1G-0	mycothiol biosynthesis	2.32541e-06	0.780979	2.4e-06	0.6653	9.15344e-07	0.588556
logistic regression model	TCA	TCA cycle I (prokaryotic)	1.08202e-05	0.777517	1.03e-05	0.6991	8.11885e-06	0.693733
logistic regression model	FUCCAT-PWY	fucose degradation	4.07393e-06	0.775043	3.89e-06	0.6929	8.40467e-06	0.974387
logistic regression model	PWY-801	homocysteine and cysteine interconversion	2.82296e-06	0.770344	2.18e-06	0.6422	4.05189e-06	0.880654
logistic regression model	PWY-6293	superpathway of L-cysteine biosynthesis (fungi)	4.47069e-06	0.770344	3.49e-06	0.6422	6.37476e-06	0.880654
logistic regression model	PWY-5690	TCA cycle II (plants and fungi)	6.73845e-06	0.762553	5.98e-06	0.6677	5.01312e-06	0.687193
logistic regression model	FUC-RHAMCAT-PWY	superpathway of fucose and rhamnose degradation	3.12545e-06	0.757235	2.98e-06	0.6632	5.36472e-06	0.967302
logistic regression model	ALLANTOINDEG-PWY	superpathway of allantoin degradation in yeast	1.04087e-06	0.750062	7.8e-07	0.5729	1.06131e-06	0.838692
logistic regression model	PWY-7942	5-oxo-L-proline metabolism	5.90294e-06	0.743013	9.1e-06	0.7366	2.45837e-06	0.73297
logistic regression model	P108-PWY	pyruvate fermentation to propanoate I	2.6355e-06	0.73213	3.95e-06	0.7153	1.15873e-06	0.700272
logistic regression model	PWY-5392	reductive TCA cycle II	2.46613e-06	0.678209	3.44e-06	0.6443	6.19755e-07	0.412534
logistic regression model	GLYCOL-GLYOXDEG-PWY	superpathway of glycol metabolism and degradation	1.51677e-06	0.673386	1.65e-06	0.5795	1.27221e-06	0.773297
logistic regression model	PWY-7185	UTP and CTP dephosphorylation I	9.21216e-06	0.672397	8.46e-06	0.5839	1.6672e-05	0.876294
logistic regression model	PWY-7210	pyrimidine deoxyribonucleotides biosynthesis from CTP	1.38471e-05	0.671902	1.28e-05	0.5832	2.48193e-05	0.876294
logistic regression model	TCA-GLYOX-BYPASS	superpathway of glyoxylate bypass and TCA	2.56857e-06	0.650383	2.96e-06	0.5722	1.09426e-06	0.53188
logistic regression model	PWY-5464	superpathway of cytosolic glycolysis (plants), pyruvate dehydrogenase and TCA cycle	4.59215e-06	0.641726	3.53e-06	0.5005	3.80241e-06	0.644142
logistic regression model	PWY-5136	fatty acid &beta;-oxidation II (plant peroxisome)	1.89691e-06	0.600173	2.09e-06	0.5078	2.05765e-06	0.818529
logistic regression model	PWY-6590	superpathway of Clostridium acetobutylicum acidogenic fermentation	3.27086e-06	0.596958	3.31e-06	0.5033	4.67347e-06	0.817439
logistic regression model	PWY-6961	L-ascorbate degradation II (bacterial, aerobic)	1.85409e-06	0.581375	1.78e-06	0.5095	5.10922e-06	0.9297
logistic regression model	DARABCATK12-PWY	D-arabinose degradation I	1.24481e-06	0.574944	1.2e-06	0.4612	2.2513e-06	0.853951
logistic regression model	P621-PWY	nylon-6 oligomer degradation	5.89515e-07	0.570245	7.79e-07	0.5105	1.84472e-07	0.384196
logistic regression model	GLYCOLYSIS-TCA-GLYOX-BYPASS	superpathway of glycolysis, pyruvate dehydrogenase, TCA, and glyoxylate bypass	2.97041e-06	0.568884	2.81e-06	0.4533	1.77303e-06	0.510627
logistic regression model	PWY-7388	octanoyl-[acyl-carrier protein] biosynthesis (mitochondria, yeast)	2.02935e-06	0.549592	1.76e-06	0.3999	1.81893e-06	0.638147
logistic regression model	PWY66-430	myristate biosynthesis (mitochondria)	2.08571e-06	0.549345	1.81e-06	0.3992	1.88977e-06	0.638147
logistic regression model	KETOGLUCONMET-PWY	ketogluconate metabolism	1.15118e-06	0.523621	1.11e-06	0.4254	1.19057e-06	0.642507
logistic regression model	GLUDEG-I-PWY	GABA shunt	5.91501e-07	0.431116	4.37e-07	0.3044	4.77547e-07	0.387466
logistic regression model	PWY-561	superpathway of glyoxylate cycle and fatty acid degradation	1.09464e-06	0.423201	1.16e-06	0.3306	7.33055e-07	0.454496
logistic regression model	KDO-NAGLIPASYN-PWY	superpathway of (Kdo)2-lipid A biosynthesis	1.74957e-06	0.420109	1.59e-06	0.334	1.70324e-06	0.66267
logistic regression model	PWY-5514	UDP-N-acetyl-D-galactosamine biosynthesis II	7.31003e-07	0.395127	6.47e-07	0.3061	3.59238e-07	0.310082
logistic regression model	PWY-6470	peptidoglycan biosynthesis V (&beta;-lactam resistance)	1.74094e-06	0.383379	2.4e-06	0.3961	4.77654e-07	0.174932
logistic regression model	PWY-101	photosynthesis light reactions	2.7121e-06	0.366312	4.65e-06	0.5215	3.32141e-07	0.19455
logistic regression model	PWY-7731	superpathway of photosynthetic hydrogen production	2.56822e-06	0.365941	4.46e-06	0.5205	4.23073e-07	0.19455
logistic regression model	PWY-6902	chitin degradation II (Vibrio)	3.79952e-07	0.331561	4.48e-07	0.2716	3.63442e-07	0.299728
logistic regression model	PWY-7204	pyridoxal 5'-phosphate salvage II (plants)	1.25022e-06	0.325872	1.07e-06	0.2372	8.08288e-07	0.352589
logistic regression model	PWY-7820	teichuronic acid biosynthesis (B. subtilis 168)	2.80723e-07	0.312515	2.48e-07	0.2313	6.29347e-08	0.154768
logistic regression model	PWY-6731	starch degradation III	6.02607e-07	0.289884	6.6e-07	0.2044	4.12549e-07	0.117166
logistic regression model	PWY-7874	L-threonate degradation	1.07071e-06	0.279619	1.15e-06	0.2468	1.63916e-06	0.409264
logistic regression model	PWY-7389	superpathway of anaerobic energy metabolism (invertebrates)	9.89593e-07	0.258966	1.47e-06	0.2792	1.45597e-07	0.0599455
logistic regression model	PWY-7376	cob(II)yrinate a,c-diamide biosynthesis II (late cobalt incorporation)	9.93205e-07	0.245115	1.51e-06	0.2754	1.10562e-07	0.0474114
logistic regression model	PHOTOALL-PWY	oxygenic photosynthesis	6.13571e-07	0.243507	9.61e-07	0.3733	5.51038e-08	0.107902
logistic regression model	GLUCARGALACTSUPER-PWY	superpathway of D-glucarate and D-galactarate degradation	1.55124e-07	0.230151	2.11e-07	0.1555	7.77402e-08	0.164578
logistic regression model	PWY-7873	D-erythronate degradation II	7.82369e-07	0.213332	8.25e-07	0.1844	1.30447e-06	0.316076
logistic regression model	PWY-6876	isopropanol biosynthesis (engineered)	2.60074e-07	0.209869	2.47e-07	0.1437	3.03038e-07	0.395095
			68

## Sheet: ST7
Supplementary Table 7. The genome-wide significant and independent loci associated with the microbial features. (The suffix "_HB" of taxa means the logistic regression model used for presence/absence status of microbial taxa in the GWAS analysis; the suffix "_LOGres" means the linear model used for the log-transformed relative abundance. The MAF indicates the frequency of effect allele. The BETA …
CHARLS discovery										CHARLS replication			4DSZ			meta-analysis
Loci	Microbiome features	rsID	SNP	effect allele	other effect	MAF	BETA	P	SNP_region	MAF	BETA	P	MAF	BETA	P	feature	N	Zscore	P-value	Direction
FUT2	s__Haemophilus_sputorum_HB	rs1047781	19:48703374	T	A	0.4438	-0.4433	7.42e-41	exonic	0.4497	-0.2775	2.986e-07	0.458	-0.3356	3.544e-07	s__Haemophilus_sputorum_HB_19:48703374	13303	-14.981	9.705e-51	---
	s__Granulicatella_SGB8239_HB	rs1047781	19:48703374	T	A	0.4438	-0.2509	1.345e-15	exonic	0.4497	-0.1839	0.0005897	0.458	-0.2563	0.0001119	s__Granulicatella_SGB8239_HB_19:48703374	13303	-9.438	3.804e-21	---
	s__Veillonella_SGB6928_HB	rs1047781	19:48703374	T	A	0.4438	-0.2639	3.568e-13	exonic	0.4497	-0.2733	1.546e-05	0.461561	-0.227307	0.0197604	s__Veillonella_SGB6928_HB_19:48703374	13113	-8.726	2.639e-18	---
	DARABCATK12-PWY_HB	rs78966440	19:48709897	C	T	0.4718	-0.1947	9.59e-10	intergenic	0.4787	-0.08698	0.04532	0.4876	-0.1478	0.03688	DARABCATK12-PWY_HB_19:48709897	12953	6.424	1.329e-10	+++
	s__Alloprevotella_sp_Lung230_HB	rs76226641	19:48708575	G	C	0.4714	-0.1715	4.263e-08	intergenic	0.479	-0.04374	0.4014	0.4884	-0.006306	0.9231	s__Alloprevotella_sp_Lung230_HB_19:48708575	13301	-4.773	1.813e-06	---
POLI, C18orf54	s__Haemophilus_parahaemolyticus_HB	rs12954177	18:54497190	A	T	0.2972	-0.2336	7.759e-12	intergenic	0.3011	-0.3399	2.063e-09	0.3031	-0.1205	0.09122	s__Haemophilus_parahaemolyticus_HB_18:54497190	13310	-8.925	4.474e-19	---
	PWY-7204_HB	rs12457891	18:54499286	T	A	0.2951	-0.2486	4.068e-11	intergenic	0.2999	-0.3559	2.199e-07	0.294	-0.1136	0.1407	PWY-7204_HB_18:54499286	12959	-8.278	1.25e-16	---
AMY1C	g__Stomatobaculum_LOGres	rs1930179	1:103823102	T	A	0.397	0.0759	1.051e-11	intergenic	0.403739	0.144374	0.04113	0.3909	-3.597e-05	0.9988	g__Stomatobaculum_LOGres_1:103823102	12911	6.345	2.219e-10	++-
	s__Stomatobaculum_SGB5266_HB	rs7518202	1:103812804	T	A	0.3941	0.1829	1.003e-08	intergenic	0.4005	0.09552	0.06825	0.3858	0.08344	0.208	s__Stomatobaculum_SGB5266_HB_1:103812804	13271	5.886	3.964e-09	+++
PRB3	s__Streptococcus_infantis_LOGres	rs7966719	12:11242238	A	C	0.4316	-0.07234	4.661e-11	intergenic	0.421286	-0.0914994	0.0411802	0.4139	-0.0561	0.01362	s__Streptococcus_infantis_LOGres_12:11242238	13240	-7.12	1.078e-12	---
	s__Capnocytophaga_gingivalis_LOGres	rs55885831	12:11275357	T	TTTTGTTTACA	0.3676	0.06328	1.009e-08	intergenic	0.359134	0.109394	0.123257	0.3523	0.002025	0.9292	s__Capnocytophaga_gingivalis_LOGres_12:11275357	13161	5.293	1.2e-07	+++
SLC2A9	g__Lachnoanaerobaculum_LOGres	rs3796835	4:10009906	C	T	0.4063	-0.07171	8.972e-11	intronic	0.397835	-0.168245	0.0123071	0.4219	-0.09244	4.799e-05	g__Lachnoanaerobaculum_LOGres_4:10009906	13132	-7.873	3.464e-15	---
	g__Candidatus_Nanosyncoccus_HB	rs4502681	4:9988548	C	T	0.3742	-0.196	1.423e-09	intronic	0.3731	-0.0865	0.1085	0.4	-0.1953	0.003881	g__Candidatus_Nanosyncoccus_HB_4:9988548	13311	-6.657	2.804e-11	---
	s__Lachnoanaerobaculum_sp_ICM7_HB	rs28730480	4:10047243	C	T	0.4043	-0.188	2.743e-09	intergenic	0.3955	-0.2116	6.059e-05	0.4221	-0.2597	0.0001081	s__Lachnoanaerobaculum_sp_ICM7_HB_4:10047243	13307	-8.099	5.561e-16	---
	PWY-6353_LOGres	rs3796831	4:10014328	G	C	0.3796	-0.06635	3.012e-09	intronic	0.373102	-0.0636495	0.0221465	0.4044	-0.08249	0.0004197	PWY-6353_LOGres_4:10014328	12764	-7.124	1.045e-12	---
	SALVADEHYPOX-PWY_LOGres	rs3796831	4:10014328	G	C	0.3796	-0.06614	3.373e-09	intronic	0.373102	-0.0654704	0.0254676	0.4044	-0.08145	0.0004956	SALVADEHYPOX-PWY_LOGres_4:10014328	12764	-7.067	1.581e-12	---
	s__Oribacterium_SGB5283_HB	rs147509415	4:10057718	TA	T	0.3722	0.1829	4.826e-08	intergenic	0.4423	0.1892	0.0005747	NA	NA	NA	s__Oribacterium_SGB5283_HB_4:10057718	11311	6.452	1.103e-10	++?
HLA-DRA,HLA-DRB5	s__GGB1611_SGB2208_HB	rs117806759	6:32466946	A	T	0.06054	-0.4247	1.045e-09	intergenic	0.06248	-0.4671	3.336e-05	0.06111	-0.2743	0.04875	s__GGB1611_SGB2208_HB_6:32466946	13310	-7.564	3.909e-14	---
PTPRD	s__Actinomyces_SGB17157_HB	rs17768428	9:9445270	T	G	0.05087	0.4378	2.409e-09	intronic	0.04724	-0.04621	0.7056	0.0567	0.1289	0.3623	s__Actinomyces_SGB17157_HB_9:9445270	13310	4.887	1.025e-06	+-+
IRF2	GLYCOGENSYNTH-PWY_LOGres	rs6811914	4:184454784	C	T	0.3791	-0.0663	2.436e-09	intronic	0.373355	0.00117553	0.916061	0.3746	-0.03403	0.145	GLYCOGENSYNTH-PWY_LOGres_4:184454784	12956	-5.209	1.899e-07	-+-
	PWY-6630_LOGres	rs6811914	4:184454784	C	T	0.3791	-0.06339	1.181e-08	intronic	0.373272	0.00320061	0.791113	0.3746	-0.01727	0.4596	PWY-6630_LOGres_4:184454784	12952	-4.654	3.259e-06	-+-
	HISTSYN-PWY_LOGres	rs6811914	4:184454784	C	T	0.3791	-0.06238	2.004e-08	intronic	0.373105	-0.00149683	0.935232	0.3746	0.002501	0.9147	HISTSYN-PWY_LOGres_4:184454784	12948	-4.432	9.349e-06	--+
	OANTIGEN-PWY_LOGres	rs6811914	4:184454784	C	T	0.3791	-0.06062	4.955e-08	intronic	0.373314	-0.00462399	0.657302	0.3746	-0.001257	0.9571	OANTIGEN-PWY_LOGres_4:184454784	12953	-4.542	5.582e-06	---
HTR2A(dist=167061),LINC00562(dist=866016)	GLYOXYLATE-BYPASS_HB	rs2436015	13:47064137	T	A	0.4764	-0.1848	3.942e-09	intergenic	0.4888	-0.04549	0.3895	0.4719	0.0242	0.7174	GLYOXYLATE-BYPASS_HB_13:47064137	12956	-4.93	8.229e-07	--+
CDH9	s__Lachnoanaerobaculum_umeaense_HB	rs57214828	5:26916492	T	C	0.4928	-0.2189	4.467e-09	intronic	0.48	0.05699	0.369	0.4995	0.07308	0.2705	s__Lachnoanaerobaculum_umeaense_HB_5:26916492	13308	-3.79	0.0001508	-++
AGBL1-AS1	g__GGB1186_HB	rs10520621	15:86313585	G	A	0.07078	0.3761	4.815e-09	ncRNA_intronic	0.07314	0.1725	0.1341	0.06753	0.1586	0.2856	g__GGB1186_HB_15:86313585	13311	5.754	8.717e-09	+++
PDE2A	s__Solobacterium_SGB6829_HB	rs341051	11:72634860	T	C	0.2572	-0.2116	5.199e-09	intronic	0.2543	-0.06262	0.3015	0.2637	-0.03996	0.5837	s__Solobacterium_SGB6829_HB_11:72634860	13311	-5.323	1.019e-07	---
CAPN8	s__Cardiobacterium_hominis_HB	rs10915947	1:223661200	T	G	0.1312	0.2682	5.616e-09	intronic	0.1279	-0.04008	0.6064	0.1258	-0.1434	0.1358	s__Cardiobacterium_hominis_HB_1:223661200	13310	3.794	0.000148	+--
TMCO3	s__Capnocytophaga_sp_oral_taxon_863_HB	rs34788005	13:113536340	CA	C	0.3805	0.1914	6.001e-09	intronic	0.4207	0.1156	0.02544	0.3996	0.08978	0.1852	s__Capnocytophaga_sp_oral_taxon_863_HB_13:113536340	13296	6.175	6.605e-10	+++
MALRD1	s__Fusobacterium_nucleatum_LOGres	rs61322704	10:19496461	C	G	0.07701	0.0637	6.178e-09	intronic	0.0796983	-0.138017	0.14217	0.0817	-0.03865	0.08964	s__Fusobacterium_nucleatum_LOGres_10:19496461	13288	3.246	0.001171	+--
LINC01640(dist=19126),LARGE1(dist=137441)	s__GGB6813_SGB9727_HB	rs16991851	22:33135420	C	T	0.1966	-0.2297	6.237e-09	intergenic	0.2043	-0.07682	0.235	0.2047	0.01301	0.8706	s__GGB6813_SGB9727_HB_22:33135420	13310	-5.102	3.356e-07	--+
PARP11(dist=9178),CCND2-AS1(dist=366141)	g__GGB1144_LOGres	rs11062894	12:3882626	A	T	0.1349	0.06456	6.709e-09	intergenic	0.254101	0.12962	0.12216	NA	NA	NA	g__GGB1144_LOGres_12:3882626	11099	5.748	9.02e-09	++?
RPF2(dist=16418),GSTM2P1(dist=1738)	s__Candidatus_Nanosynbacter_SGB96076_HB	rs201835136	6:111044681	TTA	T	0.06373	0.4039	7.099e-09	intergenic	0	NA	NA	0.0133411	-0.316703	0.449421	s__Candidatus_Nanosynbacter_SGB96076_HB_6:111044681	9929	4.947	7.54e-07	+?-
LINC01169	s__Actinomyces_sp_ICM58_HB	rs958006	15:66634790	T	C	0.314	-0.1936	7.377e-09	ncRNA_intronic	0.3167	0.01777	0.7558	0.3043	-0.08451	0.2334	s__Actinomyces_sp_ICM58_HB_15:66634790	13300	-4.879	1.067e-06	-+-
ASB7(dist=95430),ALDH1A3(dist=132563)	s__GGB1844_SGB2532_HB	rs8038825	15:100747129	C	T	0.2236	-0.265	7.981e-09	intergenic	0.2187	0.1111	0.1484	0.222	0.03124	0.6931	s__GGB1844_SGB2532_HB_15:100747129	13309	-3.721	0.0001981	-++
PRKAG2	g__Isoptericola_HB	rs79913076	7:151716594	A	C	0.09804	0.3386	8.172e-09	intronic	0.09643	0.02374	0.8295	0.11331	0.108962	0.504274	g__Isoptericola_HB_7:151716594	13120	4.94	7.805e-07	+++
CELF4	s__Campylobacter_SGB19347_HB	rs11665477	18:37430432	C	T	0.1402	0.2633	8.378e-09	intronic	0.1287	-0.143	0.07624	0.146	0.144	0.1158	s__Campylobacter_SGB19347_HB_18:37430432	13303	4.309	1.638e-05	+-+
BMP2(dist=246958),LINC01428(dist=119231)	s__Actinomyces_bouchesdurhonensis_HB	rs4815963	20:7027236	C	T	0.4447	0.1934	9.268e-09	intergenic	0.4365	0.06037	0.2968	0.4551	0.05762	0.3915	s__Actinomyces_bouchesdurhonensis_HB_20:7027236	13309	5.369	7.905e-08	+++
	s__Alloprevotella_SGB1484_HB	rs6107904	20:6989867	A	G	0.4594	0.1721	3.475e-08	intergenic	0.4496	0.1023	0.0534	0.4593	0.02389	0.7183	s__Alloprevotella_SGB1484_HB_20:6989867	13309	5.425	5.803e-08	+++
MRPS18A(dist=41019),VEGFA(dist=41378)	s__GGB12441_SGB19290_HB	rs111522290	6:43728831	GT	G	0.05857	0.3953	9.311e-09	intergenic	0.06297	0.2371	0.02957	0.0549	0.3747	0.0104	s__GGB12441_SGB19290_HB_6:43728831	13311	6.56	5.364e-11	+++
WDR87	s__Actinomyces_sp_HMT897_HB	rs75927060	19:37900686	C	A	0.3696	0.1868	1.226e-08	intronic	0.3739	-0.03801	0.488	0.380884	-0.0142014	0.895778	s__Actinomyces_sp_HMT897_HB_19:37900686	13112	4.156	3.242e-05	+--
CMKLR1(dist=80367),LINC01498(dist=39741)	s__GGB45697_SGB2042_HB	rs11113866	12:108419684	A	C	0.3725	-0.189	1.271e-08	intergenic	0.3696	0.02451	0.6667	0.3759	0.04088	0.5602	s__GGB45697_SGB2042_HB_12:108419684	13290	-4.071	4.689e-05	-++
WDR11-AS1	PWY-5345_LOGres	chr10:120815306	10:120815306	G	GT	0.4099	0.06332	1.35e-08	ncRNA_intronic	0.412313	-0.00270742	0.913228	NA	NA	NA	PWY-5345_LOGres_10:120815306	11036	4.788	1.683e-06	+-?
HEATR5B,EIF2AK2	PWY-4041_LOGres	rs12478843	2:37080089	A	G	0.1604	0.06305	1.424e-08	intronic	0.156219	0.00719322	0.785753	0.1589	-0.008199	0.7256	PWY-4041_LOGres_2:37080089	12940	4.479	7.515e-06	++-
	PWY-7345_LOGres	rs34036810	2:37135337	G	A	0.09666	0.06219	2.239e-08	intronic	0.08677	0.00559483	0.780029	0.09423	-0.02993	0.2002	PWY-7345_LOGres_2:37135337	12938	4.07	4.692e-05	++-
RAB19(dist=10734),MKRN1(dist=16056)	g__GGB1024_HB	rs12216619	7:140436984	A	G	0.149	0.2845	1.429e-08	intergenic	0.1456	-0.1079	0.2293	0.1482	-0.02799	0.8002	g__GGB1024_HB_7:140436984	13307	3.812	0.0001376	+--
TRIM42	p__Candidatus_Saccharibacteria_LOGres	rs143494694	3:140699028	TTACTTC	T	0.3842	-0.06221	1.493e-08	intronic	0.398655	-0.00505152	0.920738	0.3927	0.01002	0.6602	p__Candidatus_Saccharibacteria_LOGres_3:140699028	13248	-4.354	1.334e-05	--+
RGS17(dist=52041),MIR7641-2(dist=237182)	PWY-5154_LOGres	rs11155900	6:153183295	G	A	0.2219	-0.06295	1.494e-08	intergenic	0.219246	0.0432485	0.322953	0.2238	0.006124	0.7933	PWY-5154_LOGres_6:153183295	12934	-3.898	9.7e-05	-++
BAIAP2L1	s__Rothia_mucilaginosa_LOGres	chr7:98305052	7:98305052	TTG	T	0.07061	-0.06228	1.502e-08	intronic	0.122827	0.0907405	0.295865	NA	NA	NA	s__Rothia_mucilaginosa_LOGres_7:98305052	11297	-4.294	1.752e-05	-+?
	PYRIDNUCSYN-PWY_LOGres	chr7:98305052	7:98305052	TTG	T	0.07061	0.06237	2.312e-08	intronic	0	NA	NA	NA	NA	NA	PYRIDNUCSYN-PWY_LOGres_7:98305052	8010	5.587	2.312e-08	+??
HRAS(dist=603)	s__Lachnoanaerobaculum_orale_HB	rs45592146	11:536170	A	C	0.2882	-0.1934	1.666e-08	upstream	0.2947	-0.04458	0.434	0.2822	-0.05184	0.4678	s__Lachnoanaerobaculum_orale_HB_11:536170	13272	-5.117	3.103e-07	---
SEPT9	s__Lautropia_mirabilis_HB	rs549841175	17:77486523	T	C	0.07594	-0.3461	1.71e-08	intronic	0.06501	0.04471	0.674	NA	NA	NA	s__Lautropia_mirabilis_HB_17:77486523	11227	-4.597	4.282e-06	-+?
LOC102724957(dist=137327),SOX6(dist=123754)	HISTSYN-PWY_LOGres	rs12786929	11:15842695	T	C	0.2155	-0.06268	1.719e-08	intergenic	0.221179	-0.0326026	0.126199	0.2211	0.01616	0.4894	HISTSYN-PWY_LOGres_11:15842695	12947	-4.934	8.058e-07	--+
	PWY-6630_LOGres	rs7106776	11:15841117	A	G	0.2137	-0.06066	4.874e-08	intergenic	0.220961	-0.0182763	0.191119	0.2203	0.02626	0.2608	PWY-6630_LOGres_11:15841117	12951	-4.519	6.226e-06	--+
KAT6B	PWY4FS-8_LOGres	rs11001196	10:74898392	C	T	0.05637	-0.06235	2.028e-08	intronic	0.0598881	0.00479195	0.839211	0.06379	-0.0395	0.09071	PWY4FS-8_LOGres_10:74898392	12954	-4.969	6.739e-07	-+-
LINC01793(dist=812482),MIR4432HG(dist=267334)	PWY-7238_LOGres	rs79217020	2:60091882	A	C	0.05362	-0.06229	2.086e-08	intergenic	0.0557382	-0.0220403	0.372239	0.05235	-0.002308	0.9213	PWY-7238_LOGres_2:60091882	12958	-4.896	9.792e-07	---
TBX4	s__Lachnoanaerobaculum_gingivalis_HB	rs79016715	17:61458383	C	T	0.06398	-0.3595	2.091e-08	intronic	0.06494	0.0326	0.7583	0.06817	0.2256	0.08678	s__Lachnoanaerobaculum_gingivalis_HB_17:61458383	13294	-3.635	0.0002776	-++
LINC02172(dist=28631),LINC00616(dist=395362)	PWY-5367_LOGres	rs11722822	4:137632061	C	T	0.1912	-0.06239	2.122e-08	intergenic	0.185087	-0.0725756	0.0550929	0.1789	0.01005	0.667	PWY-5367_LOGres_4:137632061	12886	-5.191	2.094e-07	--+
CDKN2B-AS1(dist=289627),DMRTA1(dist=36120)	PYRIDOXSYN-PWY_LOGres	rs1576335	9:22410721	A	C	0.2017	-0.06224	2.193e-08	intergenic	0.198648	0.000542767	0.986835	0.21	0.01017	0.6634	PYRIDOXSYN-PWY_LOGres_9:22410721	12938	-4.248	2.16e-05	-++
	c__Betaproteobacteria_LOGres	rs1576335	9:22410721	A	C	0.2017	-0.06076	2.88e-08	intergenic	0.19859	0.0159622	0.806173	0.2121	0.01371	0.5467	c__Betaproteobacteria_LOGres_9:22410721	13309	-4.041	5.313e-05	-++
	s__Neisseria_subflava_LOGres	rs1576335	9:22410721	A	C	0.2017	-0.05975	4.885e-08	intergenic	0.19859	-0.0148057	0.858608	0.2121	0.01364	0.5488	s__Neisseria_subflava_LOGres_9:22410721	13307	-4.171	3.027e-05	--+
A2ML1	g__GGB2671_HB	rs10219707	12:8866864	G	A	0.2068	0.2178	2.201e-08	intronic	0.2063	-0.00645	0.9203	0.217	0.004973	0.9512	g__GGB2671_HB_12:8866864	13311	4.401	1.076e-05	+-+
TRAF3IP2-AS1	g__GGB2674_HB	rs796484862	6:111544595	AC	A	0.4974	-0.1743	2.54e-08	ncRNA_intronic	0.4869	-0.03586	0.4935	0.469916	0.0280334	0.696099	g__GGB2674_HB_6:111544595	13031	-4.643	3.433e-06	--+
MTMR12, ZFR	c__CFGB570_LOGres	rs6860227	5:32449710	T	C	0.167	0.06129	2.541e-08	intergenic	0.163168	0.177814	0.0235618	0.1619	0.0008014	0.972	c__CFGB570_LOGres_5:32449710	13221	5.474	4.407e-08	++-
PSORS1C1	PWY-7942_HB	chr6:31133367	6:31133367	C	CA	0.1425	-0.2694	2.621e-08	intronic	0.1384	0.029	0.7234	NA	NA	NA	PWY-7942_HB_6:31133367	11125	-4.558	5.152e-06	-+?
GAS2L2(NM_139285:c.*250C>T)	PWY-101_HB	rs117518438	17:35744604	A	G	0.06188	0.3619	2.774e-08	UTR3	0.05559	-0.07917	0.4881	NA	NA	NA	PWY-101_HB_17:35744604	11126	4.373	1.227e-05	+-?
	PWY-7731_HB	rs117518438	17:35744604	A	G	0.06188	0.3593	3.503e-08	UTR3	0.05559	-0.07493	0.5117	NA	NA	NA	PWY-7731_HB_17:35744604	11126	4.357	1.317e-05	+-?
METTL16	s__Schaalia_odontolytica_HB	rs6502295	17:2495585	G	C	0.2527	0.2331	2.791e-08	intronic	0.2498	-0.008355	0.913	0.2527	0.008725	0.9069	s__Schaalia_odontolytica_HB_17:2495585	13308	4.385	1.158e-05	+-+
CNTN5	g__Peptostreptococcus_LOGres	rs768471409	11:100234224	A	AAGAC	0.1692	0.06115	2.82e-08	intronic	0.160158	0.114442	0.171836	0.1581	-0.04051	0.07528	g__Peptostreptococcus_LOGres_11:100234224	13206	4.36	1.303e-05	++-
SPCS3(dist=37549),VEGFC(dist=313740)	g__Catonella_LOGres	rs1454158	4:176369794	A	G	0.2807	-0.06178	2.832e-08	intergenic	0.270833	-0.0946689	0.264314	0.2789	-0.006793	0.7656	g__Catonella_LOGres_4:176369794	13039	-5.02	5.17e-07	---
PDE10A	s__GGB10485_SGB49305_HB	rs9365899	6:165648891	C	T	0.2741	0.1971	2.95e-08	intronic	0.2795	0.01852	0.7556	0.2947	0.01394	0.8433	s__GGB10485_SGB49305_HB_6:165648891	13306	4.61	4.021e-06	+++
AKAP13(dist=1823),LOC101929679(dist=3760)	f__FGB4967_HB	rs149041265	15:85751181	TGTTAGAC	T	0.1886	-0.2215	3.085e-08	intergenic	0.2004	0.03196	0.6261	0.199252	-0.0716271	0.390983	f__FGB4967_HB_15:85751181	13116	-4.489	7.15e-06	-+-
TINAG	s__GGB1611_SGB2208_HB	rs7738644	6:54337333	T	A	0.09838	0.2905	3.126e-08	intronic	0.1005	-0.03757	0.668	0.09928	0.07731	0.4694	s__GGB1611_SGB2208_HB_6:54337333	13306	4.448	8.681e-06	+-+
PCP4	s__Selenomonas_massiliensis_HB	rs2299752	21:39888309	C	T	0.4582	0.1752	3.221e-08	intronic	0.4676	-0.04434	0.3957	0.4569	-0.07866	0.2905	s__Selenomonas_massiliensis_HB_21:39888309	13296	3.566	0.0003624	+--
SLC1A3	RHAMCAT-PWY_LOGres	rs1423680	5:36670558	T	C	0.4082	0.06165	3.417e-08	intronic	0.424477	-0.000111408	0.996892	0.4204	-0.01298	0.5787	RHAMCAT-PWY_LOGres_5:36670558	12799	4.151	3.306e-05	+--
COL23A1	s__Selenomonas_timonae_HB	rs890812	5:178324762	A	G	0.1701	0.2373	3.517e-08	intronic	0.1783	0.04784	0.5424	0.172117	0.0942733	0.441693	s__Selenomonas_timonae_HB_5:178324762	13120	4.967	6.806e-07	+++
TMEM18(dist=15316),LINC01115(dist=87056)	s__SR1_bacterium_human_oral_taxon_HOT_345_HB	rs1320334	2:692784	G	A	0.4355	0.1745	3.529e-08	intergenic	0.4473	-0.02908	0.5853	0.4407	0.02914	0.659	s__SR1_bacterium_human_oral_taxon_HOT_345_HB_2:692784	13308	4.268	1.973e-05	+-+
CARD18(dist=212001),GRIA4(dist=258338)	s__GGB1144_SGB1469_HB	rs1584446	11:105351735	A	G	0.2916	0.1898	3.537e-08	intergenic	0.2955	-0.01257	0.8309	0.2956	0.01165	0.8667	s__GGB1144_SGB1469_HB_11:105351735	13310	4.322	1.546e-05	+-+
GRK7	s__Treponema_sp_Marseille_Q4130_HB	rs56358931	3:141797035	G	A	0.3465	0.1824	3.578e-08	intronic	0.343	-0.004315	0.9388	0.335628	-0.0145402	0.88485	s__Treponema_sp_Marseille_Q4130_HB_3:141797035	13119	4.301	1.703e-05	+--
LINC00644(dist=116787),KCNH5(dist=449817)	s__GGB1144_SGB1468_LOGres	rs1533357	14:62256760	T	C	0.1938	-0.06133	3.626e-08	intergenic	0.191866	-0.329187	0.0243284	0.1786	0.01987	0.3843	s__GGB1144_SGB1468_LOGres_14:62256760	13021	-5.088	3.622e-07	--+
PDE8A	PWY0-301_HB	rs146925469	15:85054495	T	C	0.05367	-0.3933	3.707e-08	intronic	0.05264	0.00429	0.9702	NA	NA	NA	PWY0-301_HB_15:85054495	11125	-4.672	2.979e-06	-+?
LPAR1	s__TM7_phylum_sp_oral_taxon_349_HB	rs10980630	9:110912567	C	T	0.4344	-0.1798	3.828e-08	intronic	0.4265	0.0319	0.5716	0.424269	0.0211644	0.810018	s__TM7_phylum_sp_oral_taxon_349_HB_9:110912567	13120	-4.02	5.808e-05	-++
TENM2	s__Arachnia_SGB15899_HB	rs62388813	5:167427180	A	G	0.1452	-0.2701	3.845e-08	intronic	0.1415	-0.03359	0.6933	0.1411	0.0848	0.4241	s__Arachnia_SGB15899_HB_5:167427180	13292	-4.232	2.312e-05	--+
AGGF1	g__Granulicatella_LOGres	rs7713217	5:77050114	C	T	0.2667	0.06033	3.89e-08	intronic	0.27878	0.048374	0.317375	0.266	-0.01799	0.4292	g__Granulicatella_LOGres_5:77050114	13268	4.52	6.175e-06	++-
EPB41L2	GLUCUROCAT-PWY_LOGres	chr6:130862297	6:130862297	G	GGA	0.08507	0.06234	4.094e-08	intronic	0.0817135	0.0933177	0.162296	NA	NA	NA	GLUCUROCAT-PWY_LOGres_6:130862297	10511	5.425	5.81e-08	++?
LIN7A(dist=105654),ACSS3(dist=34449)	s__Treponema_SGB3601_HB	rs10506838	12:81043569	C	G	0.1203	0.2642	4.126e-08	intergenic	0.121	-0.01138	0.8856	0.1209	-0.003459	0.9722	s__Treponema_SGB3601_HB_12:81043569	13311	4.257	2.075e-05	+--
NRXN1	s__Campylobacter_SGB19298_HB	rs939399	2:50418805	G	A	0.1834	-0.2286	4.152e-08	intronic	0.1891	0.01126	0.8681	0.1955	0.1071	0.2482	s__Campylobacter_SGB19298_HB_2:50418805	13305	-3.819	0.0001339	-++
LOC100506422(dist=498957),CAAP1(dist=223320)	s__Leptotrichia_hongkongensis_HB	rs1926784	9:26617365	C	T	0.311	-0.1883	4.195e-08	intergenic	0.3149	-0.06012	0.2845	0.3206	0.06649	0.3419	s__Leptotrichia_hongkongensis_HB_9:26617365	13311	-4.486	7.242e-06	--+
LOC389602(dist=276502),LOC285889(dist=192896)	g__GGB4936_HB	rs1733647	7:156244893	C	T	0.4108	0.1742	4.258e-08	intergenic	0.4154	-0.04313	0.4182	0.4082	-0.09004	0.1719	g__GGB4936_HB_7:156244893	13308	3.427	0.0006111	+--
LOC101927845(dist=5488),LINC01591(dist=346744)	PWY-6612_LOGres	rs4601273	8:134887387	G	A	0.07731	-0.0615	4.294e-08	intergenic	0.0796779	0.003525	0.94867	0.079	-0.02588	0.2692	PWY-6612_LOGres_8:134887387	12665	-4.721	2.342e-06	-+-
RBPJ(dist=7836),CCKAR(dist=38430)	s__Treponema_SGB69454_HB	rs7697557	4:26442966	C	G	0.0995	-0.2888	4.372e-08	intergenic	0.1053	-0.05998	0.488	0.08711	0.01028	0.9308	s__Treponema_SGB69454_HB_4:26442966	13311	-4.63	3.665e-06	--+
FGF14	PWY-5464_HB	rs59183111	13:101880543	T	C	0.3043	-0.1871	4.424e-08	intronic	0.2933	-0.02432	0.6721	0.2904	-0.08098	0.2827	PWY-5464_HB_13:101880543	12960	-4.932	8.148e-07	---
C15orf54(dist=22042),THBS1(dist=304195)	PWY-5675_LOGres	rs11436265	15:39276884	TA	T	0.1993	-0.06164	4.744e-08	intergenic	0.221078	0.00103232	0.985636	NA	NA	NA	PWY-5675_LOGres_15:39276884	10749	-4.653	3.271e-06	-+?
LINC01902	s__Parvimonas_SGB6649_HB	rs12608319	18:39852007	C	T	0.2902	-0.19	4.767e-08	ncRNA_intronic	0.2946	0.004928	0.932	0.291	0.1349	0.05869	s__Parvimonas_SGB6649_HB_18:39852007	13310	-3.557	0.0003747	-++
JPH1(dist=18810),GDAP1(dist=10212)	CITRULBIO-PWY_LOGres	rs7461720	8:74340171	G	C	0.4126	0.06066	4.982e-08	intergenic	0.413338	-0.0326156	0.18431	0.4139	-0.008344	0.721	CITRULBIO-PWY_LOGres_8:74340171	12929	3.529	0.0004169	+--
NCKAP5	s__Desulfovibrio_sp_OH1186_COT_070_HB	rs13391016	2:133287740	T	C	0.1416	-0.2945	4.985e-08	intronic	0.1335	-0.05498	0.5314	0.126793	-0.10253	0.567491	s__Desulfovibrio_sp_OH1186_COT_070_HB_2:133287740	13120	-4.854	1.212e-06	---
another one locus MTMR6–NUP58 reaching the study-wide significance in the meta-analysis
MTMR6(dist=5743),NUP58	PWY-2941_LOGres	rs9511748	13:25293309	T	C	0.4106	-0.05652	3.698e-07	intergenic	0.453902	-0.0851836	8.94219e-06	NA	NA	NA	PWY-2941_LOGres	11116	-6.656	2.822e-11	--?
	PWY-5910_LOGres	rs9511748	13:25293309	T	C	0.4106	-0.05407	1.213e-06	intergenic	0.453519	-0.114237	2.32011e-05	NA	NA	NA	PWY-5910_LOGres	11059	-6.349	2.174e-10	--?
	LACTOSECAT-PWY_LOGres	rs9511748	13:25293309	T	C	0.4106	-0.05745	2.385e-07	intergenic	0.453871	-0.107677	0.000248529	NA	NA	NA	LACTOSECAT-PWY_LOGres	11112	-6.32	2.623e-10	--?
	o__Lactobacillales_LOGres	rs9511748	13:25293309	T	C	0.4106	-0.05136	2.743e-06	intergenic	0.454516	-0.174599	1.51549e-05	NA	NA	NA	o__Lactobacillales_LOGres	11373	-6.251	4.071e-10	--?
	PWY-922_LOGres	rs9511748	13:25293309	T	C	0.4106	-0.05712	2.922e-07	intergenic	0.453731	-0.0866712	0.00395712	NA	NA	NA	PWY-922_LOGres	11373	-6.175	6.636e-10	--?
	c__Bacilli_LOGres	rs9511748	13:25293309	T	C	0.4106	-0.05163	2.425e-06	intergenic	0.454516	-0.165512	3.52674e-05	NA	NA	NA	c__Bacilli_LOGres	11373	-6.029	1.647e-09	--?
	g__Streptococcus_LOGres	rs9511748	13:25293309	T	C	0.4106	-0.04911	7.336e-06	intergenic	0.454516	-0.171243	2.26342e-05	NA	NA	NA	g__Streptococcus_LOGres	11065	-5.878	4.142e-09	--?

## Sheet: ST8
Supplementary Table 8. All the genome-wide significant variants associated with the microbial features identified in the discovery cohort and their replication information in the two validation cohorts. (The suffix "_HB" of taxa means the logistic regression model used for presence/absence status of microbial taxa in the GWAS analysis; the suffix "_LOGres" means the linear model used for the log-…
CHARLS discovery										CHARLS replication			4DSZ			meta-analysis
Microbiome features	rsID	SNP	effect allele	other effect	MAF	BETA	P	SNP_region	gene	MAF	BETA	P	MAF	BETA	P	feature	N	Zscore	P-value	Direction
s__Haemophilus_sputorum_HB	rs1047781	19:48703374	T	A	0.4438	-0.4433	7.42e-41	exonic	FUT2	0.4497	-0.2775	2.986e-07	0.458	-0.3356	3.544e-07	s__Haemophilus_sputorum_HB_19:48703374	13303	-14.981	9.705e-51	---
s__Haemophilus_sputorum_HB	rs76226641	19:48708575	G	C	0.4714	-0.4059	4.031e-35	intergenic	FUT2(dist=2641),MAMSTR(dist=4147)	0.479	-0.2304	1.424e-05	0.4884	-0.2627	6.514e-05	s__Haemophilus_sputorum_HB_19:48708575	13301	-13.381	7.828e-41	---
s__Haemophilus_sputorum_HB	rs78966440	19:48709897	C	T	0.4718	-0.3989	3.448e-34	intergenic	FUT2(dist=3963),MAMSTR(dist=2825)	0.4787	-0.2243	2.465e-05	nan	#NAME?	NA	s__Haemophilus_sputorum_HB_19:48709897	11369	-12.615	1.749e-36	--?
s__Granulicatella_SGB8239_HB	rs1047781	19:48703374	T	A	0.4438	-0.2509	1.345e-15	exonic	FUT2	0.4497	-0.1839	0.0005897	0.458	-0.2563	0.0001119	s__Granulicatella_SGB8239_HB_19:48703374	13303	-9.438	3.804e-21	---
s__Haemophilus_sputorum_HB	rs28400013	19:48747415	T	C	0.3218	-0.2758	3.156e-15	upstream;downstream	IZUMO1(dist=506);FUT1(dist=596)	0.3203	-0.1707	0.003012	0.309	-0.1964	0.004717	s__Haemophilus_sputorum_HB_19:48747415	13311	-8.733	2.471e-18	---
s__Haemophilus_sputorum_HB	rs2071699	19:48751247	A	G	0.29	-0.2671	9.896e-14	exonic	FUT1	0.284	-0.1357	0.02248	0.283	-0.205	0.004002	s__Haemophilus_sputorum_HB_19:48751247	13306	-8.076	6.682e-16	---
s__Granulicatella_SGB8239_HB	rs76226641	19:48708575	G	C	0.4714	-0.228	2.65e-13	intergenic	FUT2(dist=2641),MAMSTR(dist=4147)	0.479	-0.1108	0.03476	0.4884	-0.27	5.051e-05	s__Granulicatella_SGB8239_HB_19:48708575	13301	-8.339	7.492e-17	---
s__Veillonella_SGB6928_HB	rs1047781	19:48703374	T	A	0.4438	-0.2639	3.568e-13	exonic	FUT2	0.4497	-0.2733	1.546e-05	0.461561	-0.227307	0.0197604	s__Veillonella_SGB6928_HB_19:48703374	13113	-8.726	2.639e-18	---
s__Granulicatella_SGB8239_HB	rs78966440	19:48709897	C	T	0.4718	-0.2228	7.651e-13	intergenic	FUT2(dist=3963),MAMSTR(dist=2825)	0.4787	-0.1054	0.04487	nan	#NAME?	NA	s__Granulicatella_SGB8239_HB_19:48709897	11369	-7.171	7.451e-13	--?
s__Haemophilus_parahaemolyticus_HB	rs12954177	18:54497190	A	T	0.2972	-0.2336	7.759e-12	intergenic	C18orf54(dist=115155),DYNAP(dist=90569)	0.3011	-0.3399	2.063e-09	0.3031	-0.1205	0.09122	s__Haemophilus_parahaemolyticus_HB_18:54497190	13310	-8.925	4.474e-19	---
s__Haemophilus_sputorum_HB	rs8103840	19:48751698	C	T	0.3563	-0.23	8.155e-12	intronic	FUT1	0.3366	-0.1172	0.0395	0.350578	-0.185562	0.00791553	s__Haemophilus_sputorum_HB_19:48751698	13095	-7.407	1.288e-13	---
s__Haemophilus_parahaemolyticus_HB	rs6508302	18:54442125	C	G	0.301	-0.2322	9.53e-12	intergenic	C18orf54(dist=60090),DYNAP(dist=145634)	0.3045	-0.3051	5.093e-08	0.2974	-0.1206	0.09313	s__Haemophilus_parahaemolyticus_HB_18:54442125	13311	-8.637	5.784e-18	---
s__Haemophilus_parahaemolyticus_HB	rs6508307	18:54465088	A	G	0.307	-0.2285	1.011e-11	intergenic	C18orf54(dist=83053),DYNAP(dist=122671)	0.3086	-0.31	3.131e-08	0.3034	-0.1147	0.1072	s__Haemophilus_parahaemolyticus_HB_18:54465088	13302	-8.646	5.335e-18	---
g__Stomatobaculum_LOGres	rs1930179	1:103823102	T	A	0.397	0.0759	1.051e-11	intergenic	AMY1C(dist=64410),LOC100129138(dist=249921)	0.403739	0.144374	0.04113	0.3909	-3.597e-05	0.9988	g__Stomatobaculum_LOGres_1:103823102	12911	6.345	2.219e-10	++-
s__Haemophilus_parahaemolyticus_HB	rs7226867	18:54448356	A	G	0.3003	-0.2319	1.069e-11	intergenic	C18orf54(dist=66321),DYNAP(dist=139403)	0.3034	-0.3122	2.681e-08	0.2976	-0.1121	0.1185	s__Haemophilus_parahaemolyticus_HB_18:54448356	13310	-8.633	5.978e-18	---
s__Haemophilus_parahaemolyticus_HB	rs7237752	18:54450365	C	A	0.3035	-0.2303	1.136e-11	intergenic	C18orf54(dist=68330),DYNAP(dist=137394)	0.306	-0.3122	2.651e-08	0.3013	-0.1322	0.06422	s__Haemophilus_parahaemolyticus_HB_18:54450365	13311	-8.737	2.39e-18	---
s__Haemophilus_parahaemolyticus_HB	rs1523876	18:54471441	G	A	0.3038	-0.2301	1.175e-11	intergenic	C18orf54(dist=89406),DYNAP(dist=116318)	0.3058	-0.3171	1.618e-08	0.3	-0.1227	0.08577	s__Haemophilus_parahaemolyticus_HB_18:54471441	13311	-8.724	2.692e-18	---
s__Haemophilus_parahaemolyticus_HB	rs1523865	18:54456242	G	A	0.3073	-0.228	1.494e-11	intergenic	C18orf54(dist=74207),DYNAP(dist=131517)	0.3098	-0.306	4.413e-08	0.303213	-0.0812784	0.273399	s__Haemophilus_parahaemolyticus_HB_18:54456242	13118	-8.414	3.948e-17	---
s__Haemophilus_parahaemolyticus_HB	rs7245210	18:54447980	A	T	0.3059	-0.2275	1.537e-11	intergenic	C18orf54(dist=65945),DYNAP(dist=139779)	0.3075	-0.3028	6.12e-08	0.3017	-0.106	0.1398	s__Haemophilus_parahaemolyticus_HB_18:54447980	13305	-8.49	2.068e-17	---
s__Haemophilus_parahaemolyticus_HB	rs1523857	18:54518471	A	G	0.3007	-0.2286	1.558e-11	intergenic	C18orf54(dist=136436),DYNAP(dist=69288)	0.3035	-0.3521	6.111e-10	0.298957	-0.079839	0.286341	s__Haemophilus_parahaemolyticus_HB_18:54518471	13103	-8.747	2.191e-18	---
s__Haemophilus_parahaemolyticus_HB	rs12457891	18:54499286	T	A	0.2951	-0.2303	1.586e-11	intergenic	C18orf54(dist=117251),DYNAP(dist=88473)	0.2999	-0.3111	3.601e-08	0.2961	-0.07982	0.2645	s__Haemophilus_parahaemolyticus_HB_18:54499286	13309	-8.393	4.733e-17	---
s__Haemophilus_parahaemolyticus_HB	rs9949917	18:54452873	T	C	0.3025	-0.2289	1.634e-11	intergenic	C18orf54(dist=70838),DYNAP(dist=134886)	0.3058	-0.3139	2.241e-08	0.2997	-0.1211	0.09042	s__Haemophilus_parahaemolyticus_HB_18:54452873	13311	-8.649	5.173e-18	---
g__Stomatobaculum_LOGres	rs7518202	1:103812804	T	A	0.3941	0.07507	1.847e-11	intergenic	AMY1C(dist=54112),LOC100129138(dist=260219)	0.400459	0.146613	0.108768	0.3858	-0.0004882	0.9833	g__Stomatobaculum_LOGres_1:103812804	12882	6.062	1.346e-09	++-
s__Haemophilus_parahaemolyticus_HB	rs1866037	18:54506782	T	C	0.2953	-0.2298	1.858e-11	intergenic	C18orf54(dist=124747),DYNAP(dist=80977)	0.2999	-0.3448	1.294e-09	0.2981	-0.1204	0.09162	s__Haemophilus_parahaemolyticus_HB_18:54506782	13310	-8.86	7.986e-19	---
s__Haemophilus_parahaemolyticus_HB	rs8088822	18:54466559	G	A	0.3036	-0.2285	1.866e-11	intergenic	C18orf54(dist=84524),DYNAP(dist=121200)	0.306	-0.3184	1.419e-08	0.3018	-0.111	0.1197	s__Haemophilus_parahaemolyticus_HB_18:54466559	13311	-8.62	6.717e-18	---
s__Haemophilus_parahaemolyticus_HB	rs2099578	18:54509872	C	T	0.3033	-0.2283	1.943e-11	intergenic	C18orf54(dist=127837),DYNAP(dist=77887)	0.3065	-0.3164	1.725e-08	0.3026	-0.1059	0.1357	s__Haemophilus_parahaemolyticus_HB_18:54509872	13311	-8.575	9.952e-18	---
s__Haemophilus_parahaemolyticus_HB	rs6508301	18:54441886	T	C	0.2993	-0.2289	1.963e-11	intergenic	C18orf54(dist=59851),DYNAP(dist=145873)	0.3056	-0.3132	2.504e-08	0.297	-0.1223	0.08917	s__Haemophilus_parahaemolyticus_HB_18:54441886	13306	-8.622	6.571e-18	---
g__Stomatobaculum_LOGres	rs1930184	1:103825276	A	G	0.3985	0.07484	2.027e-11	intergenic	AMY1C(dist=66584),LOC100129138(dist=247747)	0.403739	0.143237	0.116206	0.3943	0.00319	0.8906	g__Stomatobaculum_LOGres_1:103825276	12916	6.093	1.108e-09	+++
s__Haemophilus_parahaemolyticus_HB	rs9961490	18:54502303	T	C	0.2942	-0.2289	2.097e-11	intergenic	C18orf54(dist=120268),DYNAP(dist=85456)	0.299	-0.3458	1.178e-09	0.2961	-0.1152	0.1075	s__Haemophilus_parahaemolyticus_HB_18:54502303	13311	-8.824	1.106e-18	---
g__Stomatobaculum_LOGres	rs11185182	1:103824249	T	C	0.3975	0.07474	2.131e-11	intergenic	AMY1C(dist=65557),LOC100129138(dist=248774)	0.403739	0.144374	0.113574	0.3926	0.002471	0.9152	g__Stomatobaculum_LOGres_1:103824249	12918	6.082	1.188e-09	+++
s__Haemophilus_parahaemolyticus_HB	rs9949103	18:54494838	C	A	0.3033	-0.2273	2.218e-11	intergenic	C18orf54(dist=112803),DYNAP(dist=92921)	0.3065	-0.316	1.756e-08	0.3021	-0.1098	0.1225	s__Haemophilus_parahaemolyticus_HB_18:54494838	13311	-8.578	9.679e-18	---
s__Haemophilus_parahaemolyticus_HB	rs4940337	18:54488670	G	A	0.2879	-0.2299	2.276e-11	intergenic	C18orf54(dist=106635),DYNAP(dist=99089)	0.2914	-0.3307	6.867e-09	0.2887	-0.1016	0.1588	s__Haemophilus_parahaemolyticus_HB_18:54488670	13311	-8.6	8.001e-18	---
s__Haemophilus_parahaemolyticus_HB	rs6508306	18:54451063	C	T	0.3034	-0.2269	2.337e-11	intergenic	C18orf54(dist=69028),DYNAP(dist=136696)	0.306	-0.3122	2.651e-08	0.3003	-0.1223	0.0867	s__Haemophilus_parahaemolyticus_HB_18:54451063	13311	-8.602	7.85e-18	---
s__Haemophilus_parahaemolyticus_HB	rs1523866	18:54450991	G	A	0.3067	-0.2264	2.352e-11	intergenic	C18orf54(dist=68956),DYNAP(dist=136768)	0.3099	-0.3013	6.955e-08	0.3031	-0.1136	0.112	s__Haemophilus_parahaemolyticus_HB_18:54450991	13311	-8.472	2.409e-17	---
s__Haemophilus_parahaemolyticus_HB	rs1893525	18:54508818	G	A	0.3036	-0.2271	2.442e-11	intergenic	C18orf54(dist=126783),DYNAP(dist=78941)	0.3067	-0.3147	2.049e-08	0.3021	-0.1099	0.123	s__Haemophilus_parahaemolyticus_HB_18:54508818	13309	-8.553	1.196e-17	---
s__Haemophilus_parahaemolyticus_HB	rs6508309	18:54497866	G	A	0.3039	-0.2262	2.484e-11	intergenic	C18orf54(dist=115831),DYNAP(dist=89893)	0.3065	-0.3166	1.701e-08	0.3029	-0.1103	0.1188	s__Haemophilus_parahaemolyticus_HB_18:54497866	13308	-8.573	1.004e-17	---
s__Haemophilus_parahaemolyticus_HB	rs1370362	18:54509309	A	G	0.3025	-0.227	2.536e-11	intergenic	C18orf54(dist=127274),DYNAP(dist=78450)	0.3058	-0.3186	1.478e-08	0.3013	-0.1145	0.1083	s__Haemophilus_parahaemolyticus_HB_18:54509309	13309	-8.6	7.963e-18	---
s__Haemophilus_parahaemolyticus_HB	rs34893633	18:54447706	T	A	0.3065	-0.2237	2.706e-11	intergenic	C18orf54(dist=65671),DYNAP(dist=140053)	0.3078	-0.2989	8.709e-08	0.3041	-0.1037	0.1469	s__Haemophilus_parahaemolyticus_HB_18:54447706	13305	-8.384	5.112e-17	---
s__Haemophilus_parahaemolyticus_HB	rs940313	18:54454556	G	T	0.3028	-0.2268	2.758e-11	intergenic	C18orf54(dist=72521),DYNAP(dist=133203)	0.3062	-0.3132	2.342e-08	0.3003	-0.1276	0.07454	s__Haemophilus_parahaemolyticus_HB_18:54454556	13311	-8.62	6.717e-18	---
s__Haemophilus_parahaemolyticus_HB	rs9797474	18:54447543	C	T	0.3044	-0.2249	2.767e-11	intergenic	C18orf54(dist=65508),DYNAP(dist=140216)	0.3078	-0.2989	8.712e-08	0.3007	-0.1104	0.123	s__Haemophilus_parahaemolyticus_HB_18:54447543	13307	-8.416	3.892e-17	---
s__Haemophilus_parahaemolyticus_HB	rs7227152	18:54448295	G	A	0.3044	-0.2255	2.914e-11	intergenic	C18orf54(dist=66260),DYNAP(dist=139464)	0.3076	-0.301	7.272e-08	0.3005	-0.09358	0.1924	s__Haemophilus_parahaemolyticus_HB_18:54448295	13310	-8.334	7.784e-17	---
s__Haemophilus_sputorum_HB	rs281407	19:48730078	G	A	0.3754	0.223	2.929e-11	intronic	RASIP1	0.372	0.1111	0.04372	0.3733	0.1855	0.005465	s__Haemophilus_sputorum_HB_19:48730078	13303	7.285	3.228e-13	+++
s__Haemophilus_parahaemolyticus_HB	rs9960794	18:54501572	T	G	0.2937	-0.2277	3.016e-11	intergenic	C18orf54(dist=119537),DYNAP(dist=86187)	0.2988	-0.3444	1.37e-09	0.296041	-0.0823408	0.270851	s__Haemophilus_parahaemolyticus_HB_18:54501572	13120	-8.617	6.873e-18	---
s__Haemophilus_parahaemolyticus_HB	rs8093568	18:54493928	G	A	0.3076	-0.224	3.112e-11	intergenic	C18orf54(dist=111893),DYNAP(dist=93831)	0.3104	-0.3052	4.657e-08	0.3054	-0.09407	0.1861	s__Haemophilus_parahaemolyticus_HB_18:54493928	13310	-8.372	5.662e-17	---
s__Haemophilus_parahaemolyticus_HB	rs8088482	18:54466621	A	G	0.3065	-0.225	3.171e-11	intergenic	C18orf54(dist=84586),DYNAP(dist=121138)	0.3099	-0.3075	3.792e-08	0.3043	-0.1167	0.1009	s__Haemophilus_parahaemolyticus_HB_18:54466621	13310	-8.509	1.758e-17	---
s__Haemophilus_parahaemolyticus_HB	rs7507079	18:54469324	A	G	0.2964	-0.2266	3.3e-11	intergenic	C18orf54(dist=87289),DYNAP(dist=118435)	0.2991	-0.3131	2.954e-08	0.2941	-0.1001	0.163	s__Haemophilus_parahaemolyticus_HB_18:54469324	13311	-8.431	3.416e-17	---
s__Haemophilus_parahaemolyticus_HB	rs5004435	18:54461863	C	T	0.3078	-0.2237	3.358e-11	intergenic	C18orf54(dist=79828),DYNAP(dist=125896)	0.3098	-0.306	4.413e-08	0.3045	-0.1132	0.1114	s__Haemophilus_parahaemolyticus_HB_18:54461863	13310	-8.471	2.439e-17	---
g__Stomatobaculum_LOGres	rs2183977	1:103826276	A	T	0.3989	0.07396	3.444e-11	intergenic	AMY1C(dist=67584),LOC100129138(dist=246747)	0.403575	0.14306	0.116825	0.393	0.004063	0.8608	g__Stomatobaculum_LOGres_1:103826276	12921	6.045	1.495e-09	+++
g__Stomatobaculum_LOGres	rs4415574	1:103820989	A	G	0.3989	0.07391	3.549e-11	intergenic	AMY1C(dist=62297),LOC100129138(dist=252034)	0.403247	0.146219	0.109522	0.3936	0.0054	0.8158	g__Stomatobaculum_LOGres_1:103820989	12920	6.079	1.211e-09	+++
s__Haemophilus_parahaemolyticus_HB	rs12605085	18:54519602	C	G	0.3004	-0.2246	3.69e-11	intergenic	C18orf54(dist=137567),DYNAP(dist=68157)	0.3055	-0.3375	2.335e-09	0.3008	-0.09807	0.1693	s__Haemophilus_parahaemolyticus_HB_18:54519602	13311	-8.616	6.962e-18	---
s__Haemophilus_parahaemolyticus_HB	rs1554586	18:54525759	G	A	0.3008	-0.2259	3.766e-11	intergenic	C18orf54(dist=143724),DYNAP(dist=62000)	0.305	-0.3143	2.226e-08	0.3008	-0.1106	0.1209	s__Haemophilus_parahaemolyticus_HB_18:54525759	13311	-8.499	1.913e-17	---
s__Haemophilus_parahaemolyticus_HB	rs6508304	18:54449630	T	C	0.3004	-0.2254	3.802e-11	intergenic	C18orf54(dist=67595),DYNAP(dist=138129)	0.3037	-0.3223	1.025e-08	0.299	-0.1345	0.0601	s__Haemophilus_parahaemolyticus_HB_18:54449630	13311	-8.687	3.722e-18	---
PWY-7204_HB	rs12457891	18:54499286	T	A	0.2951	-0.2486	4.068e-11	intergenic	C18orf54(dist=117251),DYNAP(dist=88473)	0.2999	-0.3559	2.199e-07	0.294	-0.1136	0.1407	PWY-7204_HB_18:54499286	12959	-8.278	1.25e-16	---
g__Stomatobaculum_LOGres	chr1:103791520	1:103791520	C	CT	0.3297	0.07369	4.26e-11	intergenic	AMY1C(dist=32828),LOC100129138(dist=281503)	0.338593	0.110904	0.245143	0.323988	0.0981971	0.32702	g__Stomatobaculum_LOGres_1:103791520	11032	6.223	4.889e-10	++?
s__Haemophilus_parahaemolyticus_HB	rs1403885	18:54513877	G	A	0.3018	-0.2249	4.261e-11	intergenic	C18orf54(dist=131842),DYNAP(dist=73882)	0.3053	-0.3172	1.683e-08	0.3013	-0.1271	0.07515	s__Haemophilus_parahaemolyticus_HB_18:54513877	13311	-8.595	8.344e-18	---
s__Haemophilus_parahaemolyticus_HB	rs6508300	18:54441835	C	T	0.3034	-0.2237	4.489e-11	intergenic	C18orf54(dist=59800),DYNAP(dist=145924)	0.3096	-0.3029	6.228e-08	0.2997	-0.107	0.1347	s__Haemophilus_parahaemolyticus_HB_18:54441835	13311	-8.371	5.734e-17	---
g__Stomatobaculum_LOGres	rs6692921	1:103826679	G	A	0.3982	0.07352	4.5e-11	intergenic	AMY1C(dist=67987),LOC100129138(dist=246344)	0.403903	0.145107	0.111113	0.3938	0.001643	0.9435	g__Stomatobaculum_LOGres_1:103826679	12920	5.986	2.145e-09	+++
s__Haemophilus_parahaemolyticus_HB	rs4940335	18:54452375	C	T	0.3069	-0.2227	4.514e-11	intergenic	C18orf54(dist=70340),DYNAP(dist=135384)	0.3098	-0.303	5.918e-08	0.3028	-0.1153	0.1066	s__Haemophilus_parahaemolyticus_HB_18:54452375	13311	-8.419	3.79e-17	---
s__Haemophilus_parahaemolyticus_HB	rs7240970	18:54471814	A	C	0.3006	-0.2247	4.523e-11	intergenic	C18orf54(dist=89779),DYNAP(dist=115945)	0.3045	-0.3196	1.325e-08	0.2997	-0.1269	0.07508	s__Haemophilus_parahaemolyticus_HB_18:54471814	13311	-8.608	7.464e-18	---
g__Stomatobaculum_LOGres	rs11185080	1:103770443	T	G	0.3955	0.07349	4.603e-11	intergenic	AMY1C(dist=11751),LOC100129138(dist=302580)	0.401279	0.148038	0.104563	0.3893	0.002286	0.9215	g__Stomatobaculum_LOGres_1:103770443	12913	6.01	1.858e-09	+++
s__Streptococcus_infantis_LOGres	rs7966719	12:11242238	A	C	0.4316	-0.07234	4.661e-11	intergenic	TAS2R42(dist=55301),PRB3(dist=23676)	0.421286	-0.0914994	0.0411802	0.4139	-0.0561	0.01362	s__Streptococcus_infantis_LOGres_12:11242238	13240	-7.12	1.078e-12	---
s__Haemophilus_parahaemolyticus_HB	rs62091605	18:54465582	A	G	0.3067	-0.2227	4.678e-11	intergenic	C18orf54(dist=83547),DYNAP(dist=122177)	0.3099	-0.3075	3.792e-08	0.3043	-0.1105	0.1206	s__Haemophilus_parahaemolyticus_HB_18:54465582	13310	-8.43	3.469e-17	---
s__Haemophilus_parahaemolyticus_HB	rs12955166	18:54506271	C	T	0.2887	-0.2264	4.754e-11	intergenic	C18orf54(dist=124236),DYNAP(dist=81488)	0.2927	-0.3401	2.685e-09	0.2899	-0.09874	0.1702	s__Haemophilus_parahaemolyticus_HB_18:54506271	13309	-8.574	1.001e-17	---
s__Haemophilus_parahaemolyticus_HB	rs12967057	18:54505329	T	A	0.2871	-0.2264	5.036e-11	intergenic	C18orf54(dist=123294),DYNAP(dist=82430)	0.2926	-0.3419	2.236e-09	0.2905	-0.09483	0.1889	s__Haemophilus_parahaemolyticus_HB_18:54505329	13310	-8.559	1.135e-17	---
s__Haemophilus_parahaemolyticus_HB	rs7245059	18:54447892	A	G	0.3038	-0.2203	5.131e-11	intergenic	C18orf54(dist=65857),DYNAP(dist=139867)	0.3035	-0.3137	2.319e-08	0.2987	-0.1003	0.1601	s__Haemophilus_parahaemolyticus_HB_18:54447892	13302	-8.404	4.313e-17	---
s__Haemophilus_parahaemolyticus_HB	rs1523867	18:54442818	A	G	0.3041	-0.222	5.283e-11	intergenic	C18orf54(dist=60783),DYNAP(dist=144941)	0.3065	-0.3012	7.375e-08	0.301323	-0.0721278	0.336762	s__Haemophilus_parahaemolyticus_HB_18:54442818	13115	-8.174	2.983e-16	---
s__Haemophilus_parahaemolyticus_HB	rs1554587	18:54525549	C	T	0.3045	-0.223	5.317e-11	intergenic	C18orf54(dist=143514),DYNAP(dist=62210)	0.3088	-0.3051	4.979e-08	0.3028	-0.1106	0.1218	s__Haemophilus_parahaemolyticus_HB_18:54525549	13311	-8.389	4.888e-17	---
g__Stomatobaculum_LOGres	rs10881479	1:103814778	C	A	0.3964	0.07319	5.479e-11	intergenic	AMY1C(dist=56086),LOC100129138(dist=258245)	0.399639	0.147463	0.108026	0.387995	0.122381	0.196711	g__Stomatobaculum_LOGres_1:103814778	12798	6.448	1.136e-10	+++
s__Haemophilus_parahaemolyticus_HB	rs17475403	18:54506282	G	C	0.2982	-0.2231	5.501e-11	intergenic	C18orf54(dist=124247),DYNAP(dist=81477)	0.3032	-0.3336	3.613e-09	0.299	-0.1157	0.1059	s__Haemophilus_parahaemolyticus_HB_18:54506282	13311	-8.627	6.311e-18	---
s__Haemophilus_parahaemolyticus_HB	rs1403886	18:54465970	G	C	0.3087	-0.2214	5.517e-11	intergenic	C18orf54(dist=83935),DYNAP(dist=121789)	0.3111	-0.3079	3.55e-08	0.305572	-0.0702487	0.34429	s__Haemophilus_parahaemolyticus_HB_18:54465970	13118	-8.226	1.94e-16	---
g__Stomatobaculum_LOGres	rs1930213	1:103782098	A	G	0.3963	0.07309	5.836e-11	intergenic	AMY1C(dist=23406),LOC100129138(dist=290925)	0.400787	0.147019	0.107463	0.3901	0.002739	0.906	g__Stomatobaculum_LOGres_1:103782098	12918	5.982	2.209e-09	+++
g__Stomatobaculum_LOGres	rs2646249	1:103766510	A	C	0.3977	0.07308	5.839e-11	intergenic	AMY1C(dist=7818),LOC100129138(dist=306513)	0.401279	0.148038	0.104563	0.3907	0.0035	0.88	g__Stomatobaculum_LOGres_1:103766510	12921	6.001	1.966e-09	+++
g__Stomatobaculum_LOGres	rs1930181	1:103817678	A	G	0.3965	0.07303	6.042e-11	intergenic	AMY1C(dist=58986),LOC100129138(dist=255345)	0.399967	0.147357	0.107475	0.3885	0.001219	0.9581	g__Stomatobaculum_LOGres_1:103817678	12918	5.953	2.628e-09	+++
g__Stomatobaculum_LOGres	rs1930180	1:103822755	A	G	0.3977	0.07294	6.364e-11	intergenic	AMY1C(dist=64063),LOC100129138(dist=250268)	0.403903	0.14455	0.11297	0.3938	0.007054	0.7609	g__Stomatobaculum_LOGres_1:103822755	12919	6.03	1.637e-09	+++
g__Stomatobaculum_LOGres	rs6685479	1:103798585	T	G	0.3959	0.07287	6.644e-11	intergenic	AMY1C(dist=39893),LOC100129138(dist=274438)	0.400951	0.145798	0.110249	0.3883	0.002226	0.9235	g__Stomatobaculum_LOGres_1:103798585	12920	5.952	2.648e-09	+++
PWY-7204_HB	rs1523876	18:54471441	G	A	0.3038	-0.2434	6.977e-11	intergenic	C18orf54(dist=89406),DYNAP(dist=116318)	0.3058	-0.3471	3.433e-07	0.2984	-0.1531	0.04717	PWY-7204_HB_18:54471441	12961	-8.367	5.925e-17	---
s__Haemophilus_parahaemolyticus_HB	rs17473551	18:54443662	C	T	0.3032	-0.2213	7.018e-11	intergenic	C18orf54(dist=61627),DYNAP(dist=144097)	0.3065	-0.2979	1.005e-07	0.2997	-0.1114	0.1204	s__Haemophilus_parahaemolyticus_HB_18:54443662	13311	-8.298	1.056e-16	---
s__Haemophilus_parahaemolyticus_HB	rs8087226	18:54498129	A	G	0.2965	-0.2221	7.063e-11	intergenic	C18orf54(dist=116094),DYNAP(dist=89630)	0.3011	-0.3447	1.264e-09	0.2972	-0.1169	0.1022	s__Haemophilus_parahaemolyticus_HB_18:54498129	13309	-8.686	3.756e-18	---
s__Haemophilus_parahaemolyticus_HB	rs57681820	18:54494671	G	A	0.308	-0.2199	7.301e-11	intergenic	C18orf54(dist=112636),DYNAP(dist=93088)	0.3104	-0.3052	4.657e-08	0.3061	-0.09164	0.1969	s__Haemophilus_parahaemolyticus_HB_18:54494671	13310	-8.26	1.459e-16	---
s__Haemophilus_parahaemolyticus_HB	rs12454284	18:54501049	G	C	0.298	-0.2218	7.378e-11	intergenic	C18orf54(dist=119014),DYNAP(dist=86710)	0.3029	-0.3343	3.456e-09	0.2995	-0.1078	0.1325	s__Haemophilus_parahaemolyticus_HB_18:54501049	13311	-8.553	1.204e-17	---
g__Stomatobaculum_LOGres	rs4244372	1:103497405	A	T	0.3881	0.07267	7.476e-11	intronic	LOC101928436	0.392752	0.144496	0.114024	0.379231	0.116483	0.217719	g__Stomatobaculum_LOGres_1:103497405	12800	6.376	1.818e-10	+++
s__Haemophilus_parahaemolyticus_HB	rs1942995	18:54502955	A	G	0.2978	-0.2217	7.538e-11	intergenic	C18orf54(dist=120920),DYNAP(dist=84804)	0.3029	-0.3343	3.456e-09	0.2995	-0.113	0.1144	s__Haemophilus_parahaemolyticus_HB_18:54502955	13311	-8.578	9.619e-18	---
g__Stomatobaculum_LOGres	rs9628996	1:103808349	G	A	0.3972	0.07262	7.698e-11	intergenic	AMY1C(dist=49657),LOC100129138(dist=264674)	0.400787	0.144603	0.113368	0.3894	0.003044	0.8955	g__Stomatobaculum_LOGres_1:103808349	12921	5.941	2.83e-09	+++
s__Haemophilus_parahaemolyticus_HB	rs1554585	18:54526389	T	G	0.2923	-0.2232	8.221e-11	intergenic	C18orf54(dist=144354),DYNAP(dist=61370)	0.2991	-0.3411	1.946e-09	0.2946	-0.121	0.09289	s__Haemophilus_parahaemolyticus_HB_18:54526389	13311	-8.652	5.07e-18	---
g__Stomatobaculum_LOGres	rs6685566	1:103798590	T	G	0.3959	0.07246	8.468e-11	intergenic	AMY1C(dist=39898),LOC100129138(dist=274433)	0.400951	0.145798	0.110249	0.3886	0.001994	0.9315	g__Stomatobaculum_LOGres_1:103798590	12920	5.92	3.228e-09	+++
PWY-7204_HB	rs6508306	18:54451063	C	T	0.3034	-0.2424	8.721e-11	intergenic	C18orf54(dist=69028),DYNAP(dist=136696)	0.306	-0.3295	1.207e-06	0.299	-0.1394	0.07029	PWY-7204_HB_18:54451063	12961	-8.157	3.448e-16	---
PWY-7204_HB	rs7237752	18:54450365	C	A	0.3035	-0.2421	8.793e-11	intergenic	C18orf54(dist=68330),DYNAP(dist=137394)	0.306	-0.3295	1.207e-06	0.2998	-0.1468	0.05686	PWY-7204_HB_18:54450365	12961	-8.191	2.59e-16	---
g__Lachnoanaerobaculum_LOGres	rs3796835	4:10009906	C	T	0.4063	-0.07171	8.972e-11	intronic	SLC2A9	0.397835	-0.168245	0.0123071	0.4219	-0.09244	4.799e-05	g__Lachnoanaerobaculum_LOGres_4:10009906	13132	-7.873	3.464e-15	---
s__Haemophilus_parahaemolyticus_HB	rs10164159	18:54505035	A	G	0.2978	-0.2207	9.03e-11	intergenic	C18orf54(dist=123000),DYNAP(dist=82724)	0.3031	-0.3354	3.018e-09	0.2985	-0.1056	0.1401	s__Haemophilus_parahaemolyticus_HB_18:54505035	13310	-8.528	1.486e-17	---
s__Haemophilus_parahaemolyticus_HB	rs12327078	18:54458194	C	T	0.305	-0.2196	9.03e-11	intergenic	C18orf54(dist=76159),DYNAP(dist=129565)	0.3085	-0.3084	3.647e-08	0.302	-0.1129	0.1144	s__Haemophilus_parahaemolyticus_HB_18:54458194	13310	-8.365	6.008e-17	---
g__Stomatobaculum_LOGres	rs12130703	1:103767836	G	A	0.3971	0.07237	9.039e-11	intergenic	AMY1C(dist=9144),LOC100129138(dist=305187)	0.401279	0.148038	0.104563	0.3893	0.003248	0.8886	g__Stomatobaculum_LOGres_1:103767836	12915	5.945	2.761e-09	+++
g__Stomatobaculum_LOGres	rs1930182	1:103814374	C	T	0.3958	0.07225	9.679e-11	intergenic	AMY1C(dist=55682),LOC100129138(dist=258649)	0.400459	0.144917	0.113403	0.3927	0.005504	0.8124	g__Stomatobaculum_LOGres_1:103814374	12916	5.954	2.612e-09	+++
s__Haemophilus_parahaemolyticus_HB	rs1523864	18:54456328	T	C	0.3084	-0.2174	9.839e-11	intergenic	C18orf54(dist=74293),DYNAP(dist=131431)	0.3098	-0.306	4.413e-08	0.3064	-0.1185	0.09238	s__Haemophilus_parahaemolyticus_HB_18:54456328	13307	-8.379	5.35e-17	---
g__Stomatobaculum_LOGres	rs11185137	1:103800812	T	A	0.3954	0.07223	1.001e-10	intergenic	AMY1C(dist=42120),LOC100129138(dist=272211)	0.400951	0.145798	0.110249	0.3859	-0.001623	0.9444	g__Stomatobaculum_LOGres_1:103800812	12898	5.842	5.154e-09	++-
g__Stomatobaculum_LOGres	rs504877	1:103772875	T	A	0.3969	0.07215	1.022e-10	intergenic	AMY1C(dist=14183),LOC100129138(dist=300148)	0.401279	0.148038	0.104563	0.391	0.002977	0.8978	g__Stomatobaculum_LOGres_1:103772875	12921	5.926	3.108e-09	+++
PWY-7204_HB	rs6508302	18:54442125	C	G	0.301	-0.2422	1.046e-10	intergenic	C18orf54(dist=60090),DYNAP(dist=145634)	0.3045	-0.3238	1.749e-06	0.2959	-0.1425	0.06607	PWY-7204_HB_18:54442125	12961	-8.109	5.084e-16	---
PWY-7204_HB	rs8088822	18:54466559	G	A	0.3036	-0.2417	1.067e-10	intergenic	C18orf54(dist=84524),DYNAP(dist=121200)	0.306	-0.3434	4.497e-07	0.3008	-0.1368	0.07539	PWY-7204_HB_18:54466559	12961	-8.214	2.148e-16	---
g__Stomatobaculum_LOGres	rs550437	1:103776858	C	G	0.3977	0.07206	1.076e-10	intergenic	AMY1C(dist=18166),LOC100129138(dist=296165)	0.401279	0.148038	0.104563	0.3909	0.003726	0.8723	g__Stomatobaculum_LOGres_1:103776858	12921	5.932	2.994e-09	+++
PWY-7204_HB	rs6508309	18:54497866	G	A	0.3039	-0.2405	1.125e-10	intergenic	C18orf54(dist=115831),DYNAP(dist=89893)	0.3065	-0.3514	2.488e-07	0.3003	-0.1236	0.1048	PWY-7204_HB_18:54497866	12958	-8.203	2.344e-16	---
PWY-7204_HB	rs2099578	18:54509872	C	T	0.3033	-0.2414	1.127e-10	intergenic	C18orf54(dist=127837),DYNAP(dist=77887)	0.3065	-0.3467	3.509e-07	0.3003	-0.125	0.1022	PWY-7204_HB_18:54509872	12961	-8.176	2.941e-16	---
PWY-7204_HB	rs6508307	18:54465088	A	G	0.307	-0.238	1.162e-10	intergenic	C18orf54(dist=83053),DYNAP(dist=122671)	0.3086	-0.3364	7.014e-07	0.3012	-0.1414	0.06555	PWY-7204_HB_18:54465088	12953	-8.186	2.694e-16	---
s__Haemophilus_parahaemolyticus_HB	rs1554584	18:54526584	T	C	0.3036	-0.2194	1.163e-10	intergenic	C18orf54(dist=144549),DYNAP(dist=61175)	0.3086	-0.3035	5.791e-08	0.3018	-0.1115	0.1194	s__Haemophilus_parahaemolyticus_HB_18:54526584	13311	-8.287	1.159e-16	---
s__Haemophilus_parahaemolyticus_HB	rs3032819	18:54483760	C	CTT	0.3011	-0.2194	1.174e-10	intergenic	C18orf54(dist=101725),DYNAP(dist=103999)	0.3045	-0.3191	1.369e-08	0.2987	-0.1164	0.1033	s__Haemophilus_parahaemolyticus_HB_18:54483760	13310	-8.434	3.338e-17	---
g__Stomatobaculum_LOGres	rs1177073	1:103772967	T	C	0.3972	0.07187	1.201e-10	intergenic	AMY1C(dist=14275),LOC100129138(dist=300056)	0.401279	0.148038	0.104563	0.3915	0.003592	0.8768	g__Stomatobaculum_LOGres_1:103772967	12921	5.917	3.286e-09	+++
s__Haemophilus_parahaemolyticus_HB	rs12456836	18:54500895	T	C	0.2984	-0.2186	1.216e-10	intergenic	C18orf54(dist=118860),DYNAP(dist=86864)	0.3029	-0.3343	3.456e-09	0.2992	-0.1101	0.1239	s__Haemophilus_parahaemolyticus_HB_18:54500895	13311	-8.506	1.8e-17	---
s__Haemophilus_parahaemolyticus_HB	rs1523853	18:54483114	C	T	0.3058	-0.218	1.234e-10	intergenic	C18orf54(dist=101079),DYNAP(dist=104645)	0.3085	-0.3081	3.671e-08	0.3041	-0.09233	0.1936	s__Haemophilus_parahaemolyticus_HB_18:54483114	13310	-8.221	2.023e-16	---
g__Stomatobaculum_LOGres	rs508815	1:103784278	T	C	0.3973	0.07182	1.246e-10	intergenic	AMY1C(dist=25586),LOC100129138(dist=288745)	0.400951	0.146771	0.107894	0.3902	0.001676	0.9423	g__Stomatobaculum_LOGres_1:103784278	12919	5.873	4.275e-09	+++
s__Veillonella_SGB6928_HB	rs76226641	19:48708575	G	C	0.4714	-0.2307	1.292e-10	intergenic	FUT2(dist=2641),MAMSTR(dist=4147)	0.479	-0.1752	0.004416	0.491394	-0.326955	0.000859926	s__Veillonella_SGB6928_HB_19:48708575	13111	-7.709	1.269e-14	---
PWY-7204_HB	rs1403886	18:54465970	G	C	0.3087	-0.2386	1.307e-10	intergenic	C18orf54(dist=83935),DYNAP(dist=121789)	0.3111	-0.3417	4.434e-07	NA	NA	NA	PWY-7204_HB_18:54465970	11126	-8.118	4.737e-16	--?
PWY-7204_HB	rs1893525	18:54508818	G	A	0.3036	-0.2404	1.323e-10	intergenic	C18orf54(dist=126783),DYNAP(dist=78941)	0.3067	-0.3432	4.506e-07	0.3002	-0.123	0.1088	PWY-7204_HB_18:54508818	12959	-8.122	4.578e-16	---
s__Haemophilus_parahaemolyticus_HB	rs7243226	18:54451247	G	A	0.3039	-0.2174	1.338e-10	intergenic	C18orf54(dist=69212),DYNAP(dist=136512)	0.306	-0.3122	2.651e-08	0.3004	-0.1186	0.09666	s__Haemophilus_parahaemolyticus_HB_18:54451247	13310	-8.376	5.469e-17	---
PWY-7204_HB	rs9949103	18:54494838	C	A	0.3033	-0.24	1.347e-10	intergenic	C18orf54(dist=112803),DYNAP(dist=92921)	0.3065	-0.3508	2.555e-07	0.3	-0.1305	0.08847	PWY-7204_HB_18:54494838	12961	-8.209	2.224e-16	---
PWY-7204_HB	rs1523857	18:54518471	A	G	0.3007	-0.2394	1.368e-10	intergenic	C18orf54(dist=136436),DYNAP(dist=69288)	0.3035	-0.3577	2.044e-07	NA	NA	NA	PWY-7204_HB_18:54518471	11126	-8.188	2.646e-16	--?
PWY-7204_HB	rs1523866	18:54450991	G	A	0.3067	-0.2391	1.388e-10	intergenic	C18orf54(dist=68956),DYNAP(dist=136768)	0.3099	-0.3255	1.457e-06	0.3019	-0.1368	0.07618	PWY-7204_HB_18:54450991	12961	-8.069	7.09e-16	---
g__Stomatobaculum_LOGres	rs10881476	1:103808155	G	A	0.3957	0.07159	1.419e-10	intergenic	AMY1C(dist=49463),LOC100129138(dist=264868)	0.400787	0.144603	0.113368	0.3899	0.003858	0.8678	g__Stomatobaculum_LOGres_1:103808155	12921	5.882	4.063e-09	+++
PWY-7204_HB	rs9949917	18:54452873	T	C	0.3025	-0.2398	1.421e-10	intergenic	C18orf54(dist=70838),DYNAP(dist=134886)	0.3058	-0.3331	9.344e-07	0.2981	-0.14	0.06971	PWY-7204_HB_18:54452873	12961	-8.124	4.512e-16	---
PWY-7204_HB	rs940313	18:54454556	G	T	0.3028	-0.24	1.482e-10	intergenic	C18orf54(dist=72521),DYNAP(dist=133203)	0.3062	-0.3347	8.224e-07	0.2991	-0.1456	0.05946	PWY-7204_HB_18:54454556	12961	-8.158	3.414e-16	---
s__Granulicatella_SGB8239_HB	rs28400013	19:48747415	T	C	0.3218	-0.2153	1.518e-10	upstream;downstream	IZUMO1(dist=506);FUT1(dist=596)	0.3203	-0.0945	0.09764	0.309	-0.1412	0.04502	s__Granulicatella_SGB8239_HB_19:48747415	13311	-6.622	3.546e-11	---
g__Stomatobaculum_LOGres	rs557226	1:103762482	G	T	0.3978	0.07144	1.549e-10	intergenic	AMY1C(dist=3790),LOC100129138(dist=310541)	0.401443	0.149181	0.101981	0.3902	0.002968	0.8981	g__Stomatobaculum_LOGres_1:103762482	12921	5.882	4.058e-09	+++
g__Stomatobaculum_LOGres	rs1930211	1:103800276	A	G	0.3943	0.07143	1.583e-10	intergenic	AMY1C(dist=41584),LOC100129138(dist=272747)	0.400951	0.145798	0.110249	0.3891	0.002017	0.9307	g__Stomatobaculum_LOGres_1:103800276	12914	5.845	5.065e-09	+++
g__Stomatobaculum_LOGres	rs7542338	1:103764789	A	G	0.3951	0.07136	1.654e-10	intergenic	AMY1C(dist=6097),LOC100129138(dist=308234)	0.401279	0.148038	0.104563	0.3889	0.000973	0.9665	g__Stomatobaculum_LOGres_1:103764789	12913	5.835	5.382e-09	+++
g__Stomatobaculum_LOGres	rs7525453	1:103808944	C	T	0.3963	0.07129	1.7e-10	intergenic	AMY1C(dist=50252),LOC100129138(dist=264079)	0.401279	0.143517	0.116079	0.3894	0.01285	0.5794	g__Stomatobaculum_LOGres_1:103808944	12921	6.001	1.955e-09	+++
PWY-7204_HB	rs5004435	18:54461863	C	T	0.3078	-0.2368	1.735e-10	intergenic	C18orf54(dist=79828),DYNAP(dist=125896)	0.3098	-0.338	5.988e-07	0.303	-0.1422	0.06378	PWY-7204_HB_18:54461863	12960	-8.157	3.435e-16	---
g__Stomatobaculum_LOGres	rs11184298	1:103515168	A	C	0.3953	0.07124	1.741e-10	intronic	LOC101928436	0.400459	0.149905	0.100823	0.3879	-0.002895	0.9006	g__Stomatobaculum_LOGres_1:103515168	12921	5.774	7.724e-09	++-
s__Streptococcus_infantis_LOGres	rs7309259	12:11235480	C	T	0.3594	-0.07012	1.783e-10	intergenic	TAS2R42(dist=48543),PRB3(dist=30434)	0.357166	-0.130217	0.0312822	0.3427	-0.03284	0.149	s__Streptococcus_infantis_LOGres_12:11235480	13240	-6.623	3.525e-11	---
s__Streptococcus_infantis_LOGres	rs9651859	12:11234552	G	T	0.3602	-0.07009	1.806e-10	intergenic	TAS2R42(dist=47615),PRB3(dist=31362)	0.35733	-0.129885	0.0316203	0.3443	-0.03754	0.09895	s__Streptococcus_infantis_LOGres_12:11234552	13242	-6.698	2.11e-11	---
s__Veillonella_SGB6928_HB	rs78966440	19:48709897	C	T	0.4718	-0.2281	1.834e-10	intergenic	FUT2(dist=3963),MAMSTR(dist=2825)	0.4787	-0.1782	0.003832	nan	#NAME?	NA	s__Veillonella_SGB6928_HB_19:48709897	11369	-6.951	3.625e-12	--?
PWY-7204_HB	rs1554586	18:54525759	G	A	0.3008	-0.2395	1.891e-10	intergenic	C18orf54(dist=143724),DYNAP(dist=62000)	0.305	-0.3385	6.608e-07	0.298	-0.1355	0.07814	PWY-7204_HB_18:54525759	12961	-8.103	5.382e-16	---
PWY-7204_HB	rs1523865	18:54456242	G	A	0.3073	-0.2365	1.911e-10	intergenic	C18orf54(dist=74207),DYNAP(dist=131517)	0.3098	-0.338	5.988e-07	NA	NA	NA	PWY-7204_HB_18:54456242	11124	-8.038	9.096e-16	--?
g__Stomatobaculum_LOGres	rs6661612	1:103585996	A	G	0.3946	0.07109	1.912e-10	intergenic	AMY2B(dist=6462),AMY2A(dist=31336)	0.399803	0.155545	0.0892324	0.3881	-0.001647	0.9434	g__Stomatobaculum_LOGres_1:103585996	12920	5.812	6.176e-09	++-
PWY-7204_HB	rs1554587	18:54525549	C	T	0.3045	-0.2379	1.999e-10	intergenic	C18orf54(dist=143514),DYNAP(dist=62210)	0.3088	-0.3378	6.285e-07	0.3008	-0.1407	0.06814	PWY-7204_HB_18:54525549	12961	-8.124	4.509e-16	---
PWY-7204_HB	rs7507079	18:54469324	A	G	0.2964	-0.2391	2.044e-10	intergenic	C18orf54(dist=87289),DYNAP(dist=118435)	0.2991	-0.3501	3.385e-07	0.2925	-0.1328	0.08678	PWY-7204_HB_18:54469324	12961	-8.137	4.06e-16	---
PWY-7204_HB	rs8093568	18:54493928	G	A	0.3076	-0.2358	2.045e-10	intergenic	C18orf54(dist=111893),DYNAP(dist=93831)	0.3104	-0.3466	3.126e-07	0.3031	-0.1273	0.09717	PWY-7204_HB_18:54493928	12960	-8.124	4.521e-16	---
PWY-7204_HB	rs1370362	18:54509309	A	G	0.3025	-0.2378	2.103e-10	intergenic	C18orf54(dist=127274),DYNAP(dist=78450)	0.3058	-0.3392	6.307e-07	0.2985	-0.1252	0.1034	PWY-7204_HB_18:54509309	12959	-8.044	8.675e-16	---
s__Haemophilus_parahaemolyticus_HB	rs8095155	18:54477288	A	G	0.3051	-0.2145	2.214e-10	intergenic	C18orf54(dist=95253),DYNAP(dist=110471)	0.3085	-0.3081	3.671e-08	0.3021	-0.1075	0.1311	s__Haemophilus_parahaemolyticus_HB_18:54477288	13308	-8.23	1.872e-16	---
g__Stomatobaculum_LOGres	rs10785714	1:103514224	T	C	0.3955	0.07082	2.232e-10	intronic	LOC101928436	0.400459	0.149905	0.100823	0.3865	-0.004042	0.8616	g__Stomatobaculum_LOGres_1:103514224	12919	5.726	1.028e-08	++-
g__Stomatobaculum_LOGres	rs7515323	1:103775792	A	G	0.3965	0.07076	2.317e-10	intergenic	AMY1C(dist=17100),LOC100129138(dist=297231)	0.401279	0.148038	0.104563	0.3898	0.000593	0.9796	g__Stomatobaculum_LOGres_1:103775792	12918	5.789	7.081e-09	+++
g__Stomatobaculum_LOGres	rs12085609	1:103579934	T	C	0.3949	0.07075	2.325e-10	downstream	AMY2B(dist=400)	0.399803	0.155545	0.0892324	0.3886	4.972e-05	0.9983	g__Stomatobaculum_LOGres_1:103579934	12920	5.816	6.016e-09	+++
s__Streptococcus_infantis_LOGres	rs781905390	12:11232096	AAAAGT	A	0.3592	-0.06965	2.349e-10	intergenic	TAS2R42(dist=45159),PRB3(dist=33818)	0.356346	-0.13213	0.0286423	0.3415	-0.03644	0.1093	s__Streptococcus_infantis_LOGres_12:11232096	13242	-6.667	2.62e-11	---
PWY-7204_HB	rs4940335	18:54452375	C	T	0.3069	-0.2355	2.411e-10	intergenic	C18orf54(dist=70340),DYNAP(dist=135384)	0.3098	-0.3289	1.144e-06	0.3016	-0.1342	0.08161	PWY-7204_HB_18:54452375	12961	-8.013	1.116e-15	---
g__Stomatobaculum_LOGres	rs10881197	1:103523031	G	C	0.395	0.07062	2.504e-10	intronic	LOC101928436	0.400098	0.155791	0.0884705	0.3887	-0.0006841	0.9765	g__Stomatobaculum_LOGres_1:103523031	12920	5.797	6.745e-09	++-
PWY-7204_HB	rs57681820	18:54494671	G	A	0.308	-0.2347	2.568e-10	intergenic	C18orf54(dist=112636),DYNAP(dist=93088)	0.3104	-0.3466	3.126e-07	0.304	-0.119	0.1198	PWY-7204_HB_18:54494671	12960	-8.057	7.796e-16	---
PWY-7204_HB	rs8088482	18:54466621	A	G	0.3065	-0.2355	2.604e-10	intergenic	C18orf54(dist=84586),DYNAP(dist=121138)	0.3099	-0.3392	5.478e-07	0.3023	-0.146	0.05741	PWY-7204_HB_18:54466621	12960	-8.133	4.172e-16	---
PWY-7204_HB	rs6508301	18:54441886	T	C	0.2993	-0.2371	2.677e-10	intergenic	C18orf54(dist=59851),DYNAP(dist=145873)	0.3056	-0.333	9.688e-07	0.2949	-0.1434	0.06479	PWY-7204_HB_18:54441886	12956	-8.057	7.849e-16	---
PWY-7204_HB	rs7226867	18:54448356	A	G	0.3003	-0.2367	2.778e-10	intergenic	C18orf54(dist=66321),DYNAP(dist=139403)	0.3034	-0.3267	1.493e-06	0.2957	-0.1381	0.07478	PWY-7204_HB_18:54448356	12960	-7.986	1.396e-15	---
g__Lachnoanaerobaculum_LOGres	rs34644460	4:10016015	A	G	0.3804	-0.0698	2.78e-10	intronic	SLC2A9	0.372745	-0.138853	0.0412571	0.401	-0.09153	5.703e-05	g__Lachnoanaerobaculum_LOGres_4:10016015	13133	-7.499	6.452e-14	---
g__Stomatobaculum_LOGres	rs487659	1:103771015	C	T	0.3961	0.07044	2.78e-10	intergenic	AMY1C(dist=12323),LOC100129138(dist=302008)	0.401279	0.148038	0.104563	0.3897	0.002249	0.9227	g__Stomatobaculum_LOGres_1:103771015	12921	5.793	6.9e-09	+++
PWY-7204_HB	rs62091605	18:54465582	A	G	0.3067	-0.2347	2.81e-10	intergenic	C18orf54(dist=83547),DYNAP(dist=122177)	0.3099	-0.3392	5.478e-07	0.3025	-0.1428	0.06294	PWY-7204_HB_18:54465582	12960	-8.109	5.107e-16	---
PWY-7204_HB	rs7227152	18:54448295	G	A	0.3044	-0.2352	2.836e-10	intergenic	C18orf54(dist=66260),DYNAP(dist=139464)	0.3076	-0.3202	2.135e-06	0.2989	-0.1181	0.1272	PWY-7204_HB_18:54448295	12960	-7.852	4.103e-15	---
s__Streptococcus_infantis_LOGres	rs7966713	12:11242227	A	G	0.36	-0.06931	2.869e-10	intergenic	TAS2R42(dist=55290),PRB3(dist=23687)	0.356018	-0.129111	0.0326863	0.3423	-0.03575	0.1161	s__Streptococcus_infantis_LOGres_12:11242227	13241	-6.605	3.964e-11	---
PWY-7204_HB	rs7240970	18:54471814	A	C	0.3006	-0.2366	2.885e-10	intergenic	C18orf54(dist=89779),DYNAP(dist=115945)	0.3045	-0.3443	4.408e-07	0.297	-0.1461	0.05758	PWY-7204_HB_18:54471814	12961	-8.141	3.935e-16	---
g__Stomatobaculum_LOGres	rs6702220	1:103533873	G	A	0.3953	0.07037	2.913e-10	intronic	RNPC3	0.400131	0.156596	0.0870059	0.3887	0.0008706	0.97	g__Stomatobaculum_LOGres_1:103533873	12920	5.808	6.327e-09	+++
g__Lachnoanaerobaculum_LOGres	rs35271694	4:10016214	A	G	0.38	-0.06969	2.975e-10	intronic	SLC2A9	0.372745	-0.138853	0.0412571	0.4	-0.08947	8.357e-05	g__Lachnoanaerobaculum_LOGres_4:10016214	13133	-7.455	8.953e-14	---
PWY-7204_HB	rs4940337	18:54488670	G	A	0.2879	-0.2385	3.022e-10	intergenic	C18orf54(dist=106635),DYNAP(dist=99089)	0.2914	-0.3764	6.511e-08	0.2875	-0.1243	0.1103	PWY-7204_HB_18:54488670	12961	-8.193	2.557e-16	---
PWY-7204_HB	rs12954177	18:54497190	A	T	0.2972	-0.2364	3.054e-10	intergenic	C18orf54(dist=115155),DYNAP(dist=90569)	0.3011	-0.3752	5.439e-08	0.2989	-0.1208	0.1163	PWY-7204_HB_18:54497190	12961	-8.197	2.466e-16	---
g__Lachnoanaerobaculum_LOGres	rs2276962	4:10021256	C	T	0.38	-0.06963	3.08e-10	intronic	SLC2A9	0.368153	-0.161226	0.0191974	0.4017	-0.08443	0.0002077	g__Lachnoanaerobaculum_LOGres_4:10021256	13131	-7.51	5.913e-14	---
g__Stomatobaculum_LOGres	rs6673083	1:103541061	T	C	0.3956	0.07025	3.113e-10	intronic	RNPC3	0.400262	0.157335	0.0856421	0.3876	-0.001985	0.9318	g__Stomatobaculum_LOGres_1:103541061	12919	5.757	8.563e-09	++-
PWY-7204_HB	rs1554584	18:54526584	T	C	0.3036	-0.2355	3.248e-10	intergenic	C18orf54(dist=144549),DYNAP(dist=61175)	0.3086	-0.3365	6.859e-07	0.2992	-0.1389	0.07242	PWY-7204_HB_18:54526584	12961	-8.046	8.538e-16	---
PWY-7204_HB	rs768559847	18:54467592	AAAAC	A	0.3197	-0.2289	3.289e-10	intergenic	C18orf54(dist=85557),DYNAP(dist=120167)	0.3104	-0.3245	1.537e-06	NA	NA	NA	PWY-7204_HB_18:54467592	11124	-7.87	3.542e-15	--?
g__Stomatobaculum_LOGres	rs6671663	1:103512363	T	C	0.3954	0.0701	3.384e-10	intronic	LOC101928436	0.400459	0.149905	0.100823	0.38601	0.106202	0.262634	g__Stomatobaculum_LOGres_1:103512363	12794	6.182	6.319e-10	+++
s__Streptococcus_infantis_LOGres	rs1896551	12:11266021	A	G	0.3638	-0.06901	3.416e-10	UTR3	PRB3(NM_006249:c.*26C>T)	0.35897	-0.122435	0.0432552	0.3476	-0.03669	0.1069	s__Streptococcus_infantis_LOGres_12:11266021	13241	-6.545	5.958e-11	---
s__Haemophilus_parahaemolyticus_HB	rs1982158	18:54441302	C	T	0.306	-0.2103	3.446e-10	intergenic	C18orf54(dist=59267),DYNAP(dist=146457)	0.3096	-0.3029	6.228e-08	0.3021	-0.1107	0.1193	s__Haemophilus_parahaemolyticus_HB_18:54441302	13303	-8.15	3.64e-16	---
PWY-7204_HB	rs3032819	18:54483760	C	CTT	0.3011	-0.2352	3.478e-10	intergenic	C18orf54(dist=101725),DYNAP(dist=103999)	0.3045	-0.3437	4.521e-07	0.2966	-0.1465	0.05774	PWY-7204_HB_18:54483760	12960	-8.115	4.865e-16	---
g__Stomatobaculum_LOGres	rs10736038	1:103537547	C	G	0.3956	0.07001	3.578e-10	intronic	RNPC3	0.400131	0.157545	0.0851076	0.3887	-0.001885	0.9352	g__Stomatobaculum_LOGres_1:103537547	12921	5.743	9.318e-09	++-
g__Stomatobaculum_LOGres	chr1:103580829	1:103580829	C	CT	0.3946	0.07	3.591e-10	intergenic	AMY2B(dist=1295),AMY2A(dist=36503)	0.399803	0.155545	0.0892324	0.3894	-0.0004972	0.9829	g__Stomatobaculum_LOGres_1:103580829	12920	5.754	8.713e-09	++-
s__Streptococcus_infantis_LOGres	rs7308141	12:11265328	G	A	0.3643	-0.06891	3.616e-10	downstream	PRB3(dist=586)	0.358806	-0.120558	0.0463745	0.345382	-0.0554316	0.262672	s__Streptococcus_infantis_LOGres_12:11265328	13052	-6.36	2.02e-10	---
g__Stomatobaculum_LOGres	rs11184430	1:103554070	C	T	0.3952	0.06998	3.649e-10	intronic	RNPC3	0.399967	0.154952	0.0903078	0.3884	-0.001498	0.9485	g__Stomatobaculum_LOGres_1:103554070	12920	5.733	9.871e-09	++-
s__Streptococcus_infantis_LOGres	rs10845314	12:11275547	A	G	0.4371	-0.06887	3.715e-10	intergenic	PRB3(dist=5840),PRB4(dist=31534)	0.423582	-0.0851912	0.146617	0.4191	-0.06148	0.006856	s__Streptococcus_infantis_LOGres_12:11275547	13242	-6.678	2.422e-11	---
s__Streptococcus_infantis_LOGres	rs2114855	12:11233330	C	T	0.3618	-0.06885	3.764e-10	intergenic	TAS2R42(dist=46393),PRB3(dist=32584)	0.357494	-0.131071	0.0301214	0.3436	-0.03986	0.07978	s__Streptococcus_infantis_LOGres_12:11233330	13242	-6.657	2.799e-11	---
g__Stomatobaculum_LOGres	rs3922883	1:103528693	G	A	0.3926	0.06993	3.775e-10	intronic	RNPC3	0.400131	0.156596	0.0870059	0.3886	-0.002917	0.8999	g__Stomatobaculum_LOGres_1:103528693	12916	5.714	1.103e-08	++-
PWY-7204_HB	rs1403885	18:54513877	G	A	0.3018	-0.2348	3.779e-10	intergenic	C18orf54(dist=131842),DYNAP(dist=73882)	0.3053	-0.3405	5.737e-07	0.2989	-0.13	0.09147	PWY-7204_HB_18:54513877	12961	-8.003	1.21e-15	---
PWY-7204_HB	rs9797474	18:54447543	C	T	0.3044	-0.2325	3.796e-10	intergenic	C18orf54(dist=65508),DYNAP(dist=140216)	0.3078	-0.3254	1.466e-06	0.2986	-0.132	0.08743	PWY-7204_HB_18:54447543	12957	-7.922	2.339e-15	---
g__Stomatobaculum_LOGres	rs11184270	1:103511721	A	G	0.3912	0.06995	3.804e-10	intronic	LOC101928436	0.400459	0.149905	0.100823	0.386	-6.023e-05	0.9979	g__Stomatobaculum_LOGres_1:103511721	12908	5.725	1.033e-08	++-
PWY-7204_HB	rs1523853	18:54483114	C	T	0.3058	-0.2332	3.835e-10	intergenic	C18orf54(dist=101079),DYNAP(dist=104645)	0.3085	-0.3395	5.513e-07	0.302	-0.1345	0.07927	PWY-7204_HB_18:54483114	12960	-8.031	9.695e-16	---
s__Streptococcus_infantis_LOGres	rs7968635	12:11246667	C	T	0.3617	-0.06875	3.989e-10	intergenic	TAS2R42(dist=59730),PRB3(dist=19247)	0.356838	-0.127109	0.0356263	0.3443	-0.03526	0.1212	s__Streptococcus_infantis_LOGres_12:11246667	13242	-6.54	6.149e-11	---
g__Stomatobaculum_LOGres	rs9783063	1:103533355	C	T	0.3951	0.0698	4.021e-10	intronic	RNPC3	0.400295	0.158786	0.0827402	0.3887	0.002561	0.912	g__Stomatobaculum_LOGres_1:103533355	12921	5.808	6.336e-09	+++
s__Streptococcus_infantis_LOGres	rs1376744	12:11236471	T	C	0.3615	-0.0687	4.098e-10	intergenic	TAS2R42(dist=49534),PRB3(dist=29443)	0.357166	-0.130217	0.0312822	0.3446	-0.03696	0.1043	s__Streptococcus_infantis_LOGres_12:11236471	13242	-6.59	4.388e-11	---
g__Stomatobaculum_LOGres	rs7537183	1:103577192	C	T	0.3949	0.06976	4.143e-10	intronic	AMY2B	0.399803	0.155545	0.0892324	0.385542	0.121918	0.196908	g__Stomatobaculum_LOGres_1:103577192	12799	6.248	4.159e-10	+++
PWY-7204_HB	rs7243226	18:54451247	G	A	0.3039	-0.2324	4.221e-10	intergenic	C18orf54(dist=69212),DYNAP(dist=136512)	0.306	-0.3295	1.207e-06	0.2988	-0.139	0.07116	PWY-7204_HB_18:54451247	12960	-7.963	1.673e-15	---
g__Lachnoanaerobaculum_LOGres	rs28730480	4:10047243	C	T	0.4043	-0.06908	4.264e-10	intergenic	SLC2A9(dist=6995),WDR1(dist=27096)	0.39554	-0.168652	0.0119767	0.4221	-0.09892	1.359e-05	g__Lachnoanaerobaculum_LOGres_4:10047243	13130	-7.798	6.283e-15	---
s__Streptococcus_infantis_LOGres	rs782655515	12:11243651	AAAGGG	A	0.3591	-0.06863	4.286e-10	intergenic	TAS2R42(dist=56714),PRB3(dist=22263)	0.35651	-0.128679	0.0334811	0.3428	-0.0348	0.1261	s__Streptococcus_infantis_LOGres_12:11243651	13240	-6.535	6.341e-11	---
g__Stomatobaculum_LOGres	rs10881214	1:103536367	A	G	0.3958	0.06969	4.289e-10	intronic	RNPC3	0.400131	0.157545	0.0851076	0.3889	-0.001593	0.9452	g__Stomatobaculum_LOGres_1:103536367	12921	5.725	1.033e-08	++-
g__Stomatobaculum_LOGres	rs1060309	1:103552376	G	A	0.3954	0.06966	4.372e-10	intronic	RNPC3	0.399967	0.154952	0.0903078	0.3887	0.0004632	0.9841	g__Stomatobaculum_LOGres_1:103552376	12921	5.743	9.306e-09	+++
PWY-7204_HB	rs6508304	18:54449630	T	C	0.3004	-0.2339	4.384e-10	intergenic	C18orf54(dist=67595),DYNAP(dist=138129)	0.3037	-0.3341	9.223e-07	0.297	-0.1502	0.0522	PWY-7204_HB_18:54449630	12961	-8.036	9.29e-16	---
PWY-7204_HB	rs34893633	18:54447706	T	A	0.3065	-0.2304	4.386e-10	intergenic	C18orf54(dist=65671),DYNAP(dist=140053)	0.3078	-0.3254	1.47e-06	0.3012	-0.1168	0.1293	PWY-7204_HB_18:54447706	12955	-7.832	4.809e-15	---
g__Stomatobaculum_LOGres	rs10159229	1:103567336	G	C	0.395	0.06961	4.499e-10	intronic	AMY2B	0.399803	0.155545	0.0892324	0.3883	-0.00168	0.9422	g__Stomatobaculum_LOGres_1:103567336	12920	5.707	1.148e-08	++-
s__Streptococcus_infantis_LOGres	rs55885831	12:11275357	T	TTTTGTTTACA	0.3676	-0.06853	4.526e-10	intergenic	PRB3(dist=5650),PRB4(dist=31724)	0.359134	-0.120459	0.0464657	0.3523	-0.03406	0.1345	s__Streptococcus_infantis_LOGres_12:11275357	13242	-6.451	1.108e-10	---
s__Streptococcus_infantis_LOGres	rs10743944	12:11235770	T	C	0.3584	-0.06857	4.527e-10	intergenic	TAS2R42(dist=48833),PRB3(dist=30144)	0.357166	-0.130217	0.0312822	0.3448	-0.0392	0.0849	s__Streptococcus_infantis_LOGres_12:11235770	13233	-6.615	3.708e-11	---
PWY-7204_HB	rs6508300	18:54441835	C	T	0.3034	-0.2328	4.558e-10	intergenic	C18orf54(dist=59800),DYNAP(dist=145924)	0.3096	-0.3295	1.131e-06	0.2976	-0.1304	0.09081	PWY-7204_HB_18:54441835	12961	-7.917	2.425e-15	---
PWY-7204_HB	rs7245210	18:54447980	A	T	0.3059	-0.231	4.64e-10	intergenic	C18orf54(dist=65945),DYNAP(dist=139779)	0.3075	-0.3237	1.675e-06	0.3007	-0.1338	0.0838	PWY-7204_HB_18:54447980	12955	-7.892	2.972e-15	---
s__Streptococcus_infantis_LOGres	rs1469376	12:11238955	G	A	0.3558	-0.06855	4.64e-10	intergenic	TAS2R42(dist=52018),PRB3(dist=26959)	0.356346	-0.129902	0.031563	0.3402	-0.04472	0.04987	s__Streptococcus_infantis_LOGres_12:11238955	13218	-6.702	2.059e-11	---
s__Streptococcus_infantis_LOGres	rs1427756	12:11277508	T	A	0.3674	-0.06847	4.724e-10	intergenic	PRB3(dist=7801),PRB4(dist=29573)	0.359298	-0.119556	0.0483278	0.3514	-0.03623	0.1115	s__Streptococcus_infantis_LOGres_12:11277508	13236	-6.474	9.525e-11	---
g__Lachnoanaerobaculum_LOGres	rs4345181	4:10025240	T	A	0.3809	-0.06882	4.934e-10	intronic	SLC2A9	0.373729	-0.136298	0.0449136	0.4036	-0.09097	6.328e-05	g__Lachnoanaerobaculum_LOGres_4:10025240	13133	-7.402	1.345e-13	---
s__Streptococcus_infantis_LOGres	rs1344667	12:11248283	C	T	0.3616	-0.06834	5.047e-10	intergenic	TAS2R42(dist=61346),PRB3(dist=17631)	0.356838	-0.127109	0.0356263	0.3451	-0.03843	0.09119	s__Streptococcus_infantis_LOGres_12:11248283	13242	-6.564	5.23e-11	---
s__Streptococcus_infantis_LOGres	rs7967923	12:11246797	G	A	0.3616	-0.06829	5.191e-10	intergenic	TAS2R42(dist=59860),PRB3(dist=19117)	0.356838	-0.127109	0.0356263	0.342226	-0.0604298	0.227257	s__Streptococcus_infantis_LOGres_12:11246797	13052	-6.4	1.558e-10	---
s__Streptococcus_infantis_LOGres	rs4763649	12:11246267	T	C	0.3618	-0.06829	5.213e-10	intergenic	TAS2R42(dist=59330),PRB3(dist=19647)	0.356838	-0.127109	0.0356263	0.3448	-0.0368	0.1058	s__Streptococcus_infantis_LOGres_12:11246267	13241	-6.533	6.451e-11	---
g__Stomatobaculum_LOGres	rs7529928	1:103547151	G	C	0.3956	0.06932	5.304e-10	intronic	RNPC3	0.399803	0.158348	0.0840274	0.386116	0.120756	0.200969	g__Stomatobaculum_LOGres_1:103547151	12800	6.227	4.757e-10	+++
PWY-7204_HB	rs9961490	18:54502303	T	C	0.2942	-0.2334	5.372e-10	intergenic	C18orf54(dist=120268),DYNAP(dist=85456)	0.299	-0.3642	1.307e-07	0.2933	-0.1248	0.1059	PWY-7204_HB_18:54502303	12961	-8.068	7.146e-16	---
s__Streptococcus_infantis_LOGres	rs7133045	12:11238428	T	C	0.361	-0.06824	5.374e-10	intergenic	TAS2R42(dist=51491),PRB3(dist=27486)	0.356182	-0.131736	0.0292125	0.3432	-0.03524	0.1215	s__Streptococcus_infantis_LOGres_12:11238428	13240	-6.541	6.115e-11	---
s__Streptococcus_infantis_LOGres	rs7297800	12:11235559	T	C	0.3591	-0.06824	5.442e-10	intergenic	TAS2R42(dist=48622),PRB3(dist=30355)	0.357166	-0.130217	0.0312822	0.3442	-0.03743	0.1001	s__Streptococcus_infantis_LOGres_12:11235559	13234	-6.563	5.282e-11	---
s__Streptococcus_infantis_LOGres	rs782352651	12:11248559	CTGAA	C	0.3612	-0.06819	5.502e-10	intergenic	TAS2R42(dist=61622),PRB3(dist=17355)	0.356838	-0.127109	0.0356263	0.3441	-0.0345	0.1297	s__Streptococcus_infantis_LOGres_12:11248559	13239	-6.487	8.733e-11	---
s__Streptococcus_infantis_LOGres	rs2416551	12:11245540	T	A	0.3615	-0.06817	5.574e-10	intergenic	TAS2R42(dist=58603),PRB3(dist=20374)	0.356838	-0.126831	0.0361654	0.342226	-0.0581169	0.24495	s__Streptococcus_infantis_LOGres_12:11245540	13052	-6.371	1.874e-10	---
g__Stomatobaculum_LOGres	rs4447018	1:103497061	T	C	0.3957	0.06922	5.603e-10	intronic	LOC101928436	0.399803	0.157216	0.0850112	0.3887	0.0008696	0.9701	g__Stomatobaculum_LOGres_1:103497061	12921	5.733	9.878e-09	+++
g__Stomatobaculum_LOGres	rs7529144	1:103524378	A	G	0.3954	0.06919	5.723e-10	intronic	LOC101928436	0.400131	0.156596	0.0870059	0.3884	-0.003928	0.8654	g__Stomatobaculum_LOGres_1:103524378	12921	5.646	1.64e-08	++-
s__Streptococcus_infantis_LOGres	rs4763652	12:11249273	A	C	0.3613	-0.06812	5.751e-10	intergenic	TAS2R42(dist=62336),PRB3(dist=16641)	0.356674	-0.127438	0.0352535	0.3443	-0.0355	0.1187	s__Streptococcus_infantis_LOGres_12:11249273	13242	-6.501	7.987e-11	---
PWY-7204_HB	rs8095155	18:54477288	A	G	0.3051	-0.2304	5.775e-10	intergenic	C18orf54(dist=95253),DYNAP(dist=110471)	0.3085	-0.3395	5.513e-07	0.3	-0.1423	0.06431	PWY-7204_HB_18:54477288	12958	-8.016	1.094e-15	---
g__Stomatobaculum_LOGres	rs397778323	1:103505702	GT	G	0.3877	0.06916	5.815e-10	intronic	LOC101928436	0.397015	0.162394	0.0761953	0.382745	0.116968	0.217878	g__Stomatobaculum_LOGres_1:103505702	12783	6.222	4.903e-10	+++
g__Lachnoanaerobaculum_LOGres	rs13151113	4:10016554	A	G	0.3796	-0.0685	5.905e-10	intronic	SLC2A9	0.372745	-0.138853	0.0412571	0.4003	-0.09	7.577e-05	g__Lachnoanaerobaculum_LOGres_4:10016554	13133	-7.38	1.582e-13	---
s__Streptococcus_infantis_LOGres	rs7307066	12:11247625	G	T	0.3618	-0.06804	6.019e-10	intergenic	TAS2R42(dist=60688),PRB3(dist=18289)	0.356838	-0.127109	0.0356263	0.3451	-0.03732	0.1009	s__Streptococcus_infantis_LOGres_12:11247625	13242	-6.524	6.856e-11	---
s__Streptococcus_infantis_LOGres	chr12:11247157	12:11247157	CT	C	0.3609	-0.06804	6.04e-10	intergenic	TAS2R42(dist=60220),PRB3(dist=18757)	0.356838	-0.127109	0.0356263	0.3436	-0.039	0.0865	s__Streptococcus_infantis_LOGres_12:11247157	13241	-6.551	5.698e-11	---
g__Stomatobaculum_LOGres	chr1:103456104	1:103456104	A	AT	0.3948	0.06909	6.041e-10	intronic	LOC101928436	0.402427	0.105396	0.246999	0.3876	0.006865	0.7671	g__Stomatobaculum_LOGres_1:103456104	12920	5.548	2.896e-08	+++
s__Streptococcus_infantis_LOGres	rs7980324	12:11272840	G	C	0.3676	-0.06804	6.073e-10	intergenic	PRB3(dist=3133),PRB4(dist=34241)	0.35897	-0.120736	0.0462425	0.3505	-0.03602	0.1134	s__Streptococcus_infantis_LOGres_12:11272840	13239	-6.449	1.128e-10	---
g__Lachnoanaerobaculum_LOGres	rs3756231	4:10023920	G	A	0.3818	-0.06845	6.085e-10	intronic	SLC2A9	0.374385	-0.139286	0.0404172	0.4029	-0.09336	4.086e-05	g__Lachnoanaerobaculum_LOGres_4:10023920	13130	-7.436	1.04e-13	---
s__Streptococcus_infantis_LOGres	rs4763243	12:11249291	T	C	0.361	-0.068	6.172e-10	intergenic	TAS2R42(dist=62354),PRB3(dist=16623)	0.356674	-0.127438	0.0352535	0.3437	-0.03763	0.09826	s__Streptococcus_infantis_LOGres_12:11249291	13241	-6.528	6.679e-11	---
s__Streptococcus_infantis_LOGres	rs1863850	12:11243433	T	C	0.3617	-0.06799	6.182e-10	intergenic	TAS2R42(dist=56496),PRB3(dist=22481)	0.356674	-0.128103	0.03418	0.3448	-0.03466	0.1278	s__Streptococcus_infantis_LOGres_12:11243433	13241	-6.484	8.953e-11	---
g__Lachnoanaerobaculum_LOGres	rs3796831	4:10014328	G	C	0.3796	-0.06842	6.214e-10	intronic	SLC2A9	0.372909	-0.138481	0.0418385	0.3997	-0.08841	0.0001019	g__Lachnoanaerobaculum_LOGres_4:10014328	13131	-7.343	2.082e-13	---
g__Stomatobaculum_LOGres	rs6702324	1:103533915	T	A	0.3952	0.06902	6.281e-10	intronic	RNPC3	0.400131	0.156596	0.0870059	0.3887	0.0006798	0.9766	g__Stomatobaculum_LOGres_1:103533915	12921	5.71	1.128e-08	+++
s__Streptococcus_infantis_LOGres	rs7308391	12:11240736	C	G	0.3615	-0.06796	6.301e-10	intergenic	TAS2R42(dist=53799),PRB3(dist=25178)	0.355854	-0.131743	0.0293868	0.3446	-0.03435	0.1311	s__Streptococcus_infantis_LOGres_12:11240736	13242	-6.505	7.763e-11	---
g__Lachnoanaerobaculum_LOGres	rs751092	4:10004273	C	T	0.3976	-0.06837	6.363e-10	intronic	SLC2A9	0.395212	-0.150155	0.0255254	0.4162	-0.08856	9.868e-05	g__Lachnoanaerobaculum_LOGres_4:10004273	13133	-7.439	1.014e-13	---
s__Streptococcus_infantis_LOGres	rs4763651	12:11247202	G	A	0.3616	-0.06794	6.367e-10	intergenic	TAS2R42(dist=60265),PRB3(dist=18712)	0.356838	-0.127109	0.0356263	0.3448	-0.03434	0.1313	s__Streptococcus_infantis_LOGres_12:11247202	13241	-6.467	1.002e-10	---
s__Streptococcus_infantis_LOGres	rs4763650	12:11246630	T	G	0.362	-0.06787	6.642e-10	intergenic	TAS2R42(dist=59693),PRB3(dist=19284)	0.356838	-0.127109	0.0356263	0.3446	-0.03563	0.1174	s__Streptococcus_infantis_LOGres_12:11246630	13242	-6.483	8.994e-11	---
g__Lachnoanaerobaculum_LOGres	rs13101688	4:9951387	C	G	0.3752	-0.06828	6.721e-10	intronic	SLC2A9	0.368645	-0.117897	0.0868317	0.3902	-0.09313	4.216e-05	g__Lachnoanaerobaculum_LOGres_4:9951387	13133	-7.258	3.915e-13	---
s__Streptococcus_infantis_LOGres	rs4332603	12:11245842	C	T	0.361	-0.06783	6.795e-10	intergenic	TAS2R42(dist=58905),PRB3(dist=20072)	0.356674	-0.127438	0.0352535	0.3432	-0.04042	0.0757	s__Streptococcus_infantis_LOGres_12:11245842	13240	-6.563	5.288e-11	---
s__Streptococcus_infantis_LOGres	rs10743946	12:11249852	C	T	0.3612	-0.06782	6.817e-10	intergenic	TAS2R42(dist=62915),PRB3(dist=16062)	0.356674	-0.127438	0.0352535	0.345	-0.03561	0.1177	s__Streptococcus_infantis_LOGres_12:11249852	13241	-6.481	9.09e-11	---
s__Streptococcus_infantis_LOGres	rs10845302	12:11236234	C	T	0.3618	-0.06781	6.874e-10	intergenic	TAS2R42(dist=49297),PRB3(dist=29680)	0.357166	-0.130217	0.0312822	0.3446	-0.03514	0.1225	s__Streptococcus_infantis_LOGres_12:11236234	13242	-6.496	8.271e-11	---
g__Stomatobaculum_LOGres	rs6697444	1:103533840	T	C	0.3947	0.06882	7.08e-10	exonic	RNPC3	0.400131	0.156596	0.0870059	0.3889	-0.005428	0.8148	g__Stomatobaculum_LOGres_1:103533840	12920	5.595	2.204e-08	++-
PWY-7204_HB	rs12955166	18:54506271	C	T	0.2887	-0.2334	7.254e-10	intergenic	C18orf54(dist=124236),DYNAP(dist=81488)	0.2927	-0.3663	1.381e-07	0.2881	-0.1128	0.1463	PWY-7204_HB_18:54506271	12959	-7.964	1.667e-15	---
g__Stomatobaculum_LOGres	rs6669851	1:103540113	G	C	0.3953	0.06877	7.27e-10	intronic	RNPC3	0.399967	0.156198	0.0879601	0.3883	-0.003455	0.8815	g__Stomatobaculum_LOGres_1:103540113	12920	5.622	1.887e-08	++-
PWY-7204_HB	rs12605085	18:54519602	C	G	0.3004	-0.23	7.322e-10	intergenic	C18orf54(dist=137567),DYNAP(dist=68157)	0.3055	-0.3623	1.245e-07	0.2987	-0.1067	0.1646	PWY-7204_HB_18:54519602	12961	-7.948	1.892e-15	---
PWY-7204_HB	rs12967057	18:54505329	T	A	0.2871	-0.2337	7.323e-10	intergenic	C18orf54(dist=123294),DYNAP(dist=82430)	0.2926	-0.37	1.06e-07	0.2875	-0.1181	0.1295	PWY-7204_HB_18:54505329	12960	-8.01	1.147e-15	---
s__Streptococcus_infantis_LOGres	rs1007080379	12:11240410	T	G	0.3612	-0.06768	7.42e-10	intergenic	TAS2R42(dist=53473),PRB3(dist=25504)	0.356018	-0.131442	0.0296663	0.3436	-0.03558	0.1179	s__Streptococcus_infantis_LOGres_12:11240410	13242	-6.503	7.847e-11	---
g__Stomatobaculum_LOGres	rs4847151	1:103581040	G	A	0.3929	0.06871	7.565e-10	intergenic	AMY2B(dist=1506),AMY2A(dist=36292)	0.399803	0.155545	0.0892324	0.389	-0.000646	0.9778	g__Stomatobaculum_LOGres_1:103581040	12914	5.66	1.515e-08	++-
g__Stomatobaculum_LOGres	rs533596	1:103791146	G	A	0.3931	0.0687	7.613e-10	intergenic	AMY1C(dist=32454),LOC100129138(dist=281877)	0.401607	0.149618	0.10082	0.38669	0.123114	0.190529	g__Stomatobaculum_LOGres_1:103791146	12796	6.15	7.734e-10	+++
PWY-7204_HB	rs8087226	18:54498129	A	G	0.2965	-0.2305	7.661e-10	intergenic	C18orf54(dist=116094),DYNAP(dist=89630)	0.3011	-0.3684	9.113e-08	0.2947	-0.1253	0.1046	PWY-7204_HB_18:54498129	12959	-8.058	7.746e-16	---
g__Stomatobaculum_LOGres	rs10881232	1:103541604	G	A	0.3942	0.06863	7.851e-10	intronic	RNPC3	0.399967	0.157382	0.0855778	0.3884	-0.0004765	0.9836	g__Stomatobaculum_LOGres_1:103541604	12921	5.667	1.451e-08	++-
g__Stomatobaculum_LOGres	rs12139400	1:103532737	A	C	0.3948	0.06856	8.227e-10	intronic	RNPC3	0.400295	0.158786	0.0827402	0.3887	-0.001933	0.9335	g__Stomatobaculum_LOGres_1:103532737	12919	5.645	1.651e-08	++-
g__Stomatobaculum_LOGres	rs75729251	1:103484655	A	G	0.388	0.06858	8.267e-10	intronic	LOC101928436	0.398819	0.132289	0.147356	0.382	0.00478	0.8368	g__Stomatobaculum_LOGres_1:103484655	12908	5.616	1.959e-08	+++
s__Streptococcus_infantis_LOGres	rs10772427	12:11240562	T	G	0.3611	-0.06746	8.387e-10	intergenic	TAS2R42(dist=53625),PRB3(dist=25352)	0.356018	-0.131442	0.0296663	0.3427	-0.03488	0.1253	s__Streptococcus_infantis_LOGres_12:11240562	13241	-6.476	9.388e-11	---
s__Streptococcus_infantis_LOGres	rs1376745	12:11236729	A	C	0.3618	-0.06746	8.39e-10	intergenic	TAS2R42(dist=49792),PRB3(dist=29185)	0.357002	-0.128986	0.0328902	0.3448	-0.03297	0.1473	s__Streptococcus_infantis_LOGres_12:11236729	13242	-6.425	1.322e-10	---
PWY-7204_HB	rs1982158	18:54441302	C	T	0.306	-0.226	8.511e-10	intergenic	C18orf54(dist=59267),DYNAP(dist=146457)	0.3096	-0.3295	1.131e-06	0.2994	-0.1319	0.08582	PWY-7204_HB_18:54441302	12953	-7.85	4.15e-15	---
s__Streptococcus_infantis_LOGres	rs7307932	12:11241111	G	A	0.3615	-0.06743	8.549e-10	intergenic	TAS2R42(dist=54174),PRB3(dist=24803)	0.355854	-0.131743	0.0293868	0.3436	-0.03697	0.1042	s__Streptococcus_infantis_LOGres_12:11241111	13242	-6.511	7.47e-11	---
g__Stomatobaculum_LOGres	rs7535259	1:103495881	A	G	0.3941	0.06848	8.588e-10	intronic	LOC101928436	0.400459	0.150077	0.100205	0.3882	5.544e-05	0.9981	g__Stomatobaculum_LOGres_1:103495881	12916	5.629	1.816e-08	+++
s__Streptococcus_infantis_LOGres	rs35157751	12:11277157	A	AT	0.3669	-0.06743	8.642e-10	intergenic	PRB3(dist=7450),PRB4(dist=29924)	0.359298	-0.119556	0.0483278	0.3493	-0.04158	0.06782	s__Streptococcus_infantis_LOGres_12:11277157	13235	-6.489	8.658e-11	---
s__Streptococcus_infantis_LOGres	rs7307651	12:11240849	G	C	0.3613	-0.06739	8.73e-10	intergenic	TAS2R42(dist=53912),PRB3(dist=25065)	0.355854	-0.131743	0.0293868	0.3443	-0.03473	0.1269	s__Streptococcus_infantis_LOGres_12:11240849	13242	-6.471	9.755e-11	---
PWY-7204_HB	rs1866037	18:54506782	T	C	0.2953	-0.2306	8.843e-10	intergenic	C18orf54(dist=124747),DYNAP(dist=80977)	0.2999	-0.3564	2.263e-07	0.2948	-0.1445	0.06083	PWY-7204_HB_18:54506782	12960	-8.054	8.034e-16	---
g__Stomatobaculum_LOGres	rs141953189	1:103454103	C	G	0.3958	0.0684	8.938e-10	intronic	LOC101928436	0.402263	0.10629	0.243232	0.3869	0.007546	0.7448	g__Stomatobaculum_LOGres_1:103454103	12921	5.514	3.503e-08	+++
PWY-7204_HB	rs17473551	18:54443662	C	T	0.3032	-0.2286	8.95e-10	intergenic	C18orf54(dist=61627),DYNAP(dist=144097)	0.3065	-0.327	1.367e-06	0.2981	-0.1277	0.09916	PWY-7204_HB_18:54443662	12961	-7.799	6.23e-15	---
s__Streptococcus_infantis_LOGres	rs1965071	12:11275218	A	G	0.3666	-0.0673	9.186e-10	intergenic	PRB3(dist=5511),PRB4(dist=31863)	0.35897	-0.119225	0.0488827	0.35	-0.03575	0.1161	s__Streptococcus_infantis_LOGres_12:11275218	13242	-6.381	1.756e-10	---
s__Streptococcus_infantis_LOGres	rs7307412	12:11240721	G	T	0.3616	-0.06729	9.244e-10	intergenic	TAS2R42(dist=53784),PRB3(dist=25193)	0.356018	-0.131442	0.0296663	0.3443	-0.03555	0.1182	s__Streptococcus_infantis_LOGres_12:11240721	13242	-6.475	9.454e-11	---
s__Streptococcus_infantis_LOGres	rs2042847	12:11277946	C	T	0.3659	-0.06727	9.378e-10	intergenic	PRB3(dist=8239),PRB4(dist=29135)	0.359626	-0.119562	0.0483871	0.351	-0.03732	0.1009	s__Streptococcus_infantis_LOGres_12:11277946	13242	-6.407	1.482e-10	---
s__Streptococcus_infantis_LOGres	rs4763653	12:11250463	C	A	0.3608	-0.06727	9.395e-10	intergenic	TAS2R42(dist=63526),PRB3(dist=15451)	0.356346	-0.130336	0.0313611	0.344	-0.03562	0.1175	s__Streptococcus_infantis_LOGres_12:11250463	13241	-6.464	1.019e-10	---
s__Streptococcus_infantis_LOGres	rs1972420	12:11270341	A	C	0.3656	-0.06726	9.431e-10	upstream	PRB3(dist=634)	0.358806	-0.119545	0.0484042	0.3489	-0.03869	0.0891	s__Streptococcus_infantis_LOGres_12:11270341	13241	-6.429	1.282e-10	---
PWY-7204_HB	rs1554585	18:54526389	T	G	0.2923	-0.2313	9.467e-10	intergenic	C18orf54(dist=144354),DYNAP(dist=61370)	0.2991	-0.3564	2.3e-07	0.2915	-0.1309	0.09204	PWY-7204_HB_18:54526389	12961	-7.972	1.561e-15	---
PWY-7204_HB	rs12327078	18:54458194	C	T	0.305	-0.2278	9.473e-10	intergenic	C18orf54(dist=76159),DYNAP(dist=129565)	0.3085	-0.3352	7.661e-07	0.3006	-0.14	0.06978	PWY-7204_HB_18:54458194	12960	-7.909	2.589e-15	---
DARABCATK12-PWY_HB	rs78966440	19:48709897	C	T	0.4718	-0.1947	9.59e-10	intergenic	FUT2(dist=3963),MAMSTR(dist=2825)	0.4787	-0.08698	0.04532	0.4876	-0.1478	0.03688	DARABCATK12-PWY_HB_19:48709897	12953	6.424	1.329e-10	+++
s__Streptococcus_infantis_LOGres	rs10743945	12:11241641	G	A	0.3602	-0.06723	9.594e-10	intergenic	TAS2R42(dist=54704),PRB3(dist=24273)	0.354214	-0.136544	0.0241568	0.3412	-0.03614	0.1122	s__Streptococcus_infantis_LOGres_12:11241641	13242	-6.519	7.072e-11	---
s__Streptococcus_infantis_LOGres	rs4763660	12:11277789	A	G	0.3662	-0.06721	9.735e-10	intergenic	PRB3(dist=8082),PRB4(dist=29292)	0.359134	-0.119877	0.0478535	0.3495	-0.03826	0.09263	s__Streptococcus_infantis_LOGres_12:11277789	13240	-6.42	1.359e-10	---
s__Haemophilus_parahaemolyticus_HB	rs16958200	18:54392596	T	C	0.2683	-0.2166	9.887e-10	intergenic	C18orf54(dist=10561),DYNAP(dist=195163)	0.2734	-0.2622	6.097e-06	0.2702	-0.1004	0.1657	s__Haemophilus_parahaemolyticus_HB_18:54392596	13310	-7.527	5.189e-14	---
s__Streptococcus_infantis_LOGres	rs386760369	12:11250930	A	G	0.3597	-0.06718	9.953e-10	intergenic	TAS2R42(dist=63993),PRB3(dist=14984)	0.35651	-0.128837	0.0332638	0.3437	-0.03839	0.09163	s__Streptococcus_infantis_LOGres_12:11250930	13238	-6.492	8.486e-11	---
s__Streptococcus_infantis_LOGres	rs11054212	12:11273844	A	G	0.366	-0.0671	1.032e-09	intergenic	PRB3(dist=4137),PRB4(dist=33237)	0.35897	-0.120736	0.0462425	0.3497	-0.03732	0.101	s__Streptococcus_infantis_LOGres_12:11273844	13242	-6.404	1.511e-10	---
s__GGB1611_SGB2208_HB	rs117806759	6:32466946	A	T	0.06054	-0.4247	1.045e-09	intergenic	HLA-DRA(dist=21895),HLA-DRB5(dist=50431)	0.06248	-0.4671	3.336e-05	0.06111	-0.2743	0.04875	s__GGB1611_SGB2208_HB_6:32466946	13310	-7.564	3.909e-14	---
g__Lachnoanaerobaculum_LOGres	rs3775948	4:9993558	G	C	0.4015	-0.06743	1.089e-09	intronic	SLC2A9	0.397343	-0.128048	0.0578443	0.4214	-0.09169	5.536e-05	g__Lachnoanaerobaculum_LOGres_4:9993558	13133	-7.263	3.798e-13	---
s__Streptococcus_infantis_LOGres	rs7955473	12:11278689	C	T	0.3654	-0.067	1.09e-09	intergenic	PRB3(dist=8982),PRB4(dist=28392)	0.358806	-0.119826	0.0478777	0.345006	-0.0620813	0.20951	s__Streptococcus_infantis_LOGres_12:11278689	13051	-6.264	3.749e-10	---
g__Lachnoanaerobaculum_LOGres	rs10018663	4:10003173	C	T	0.3971	-0.06733	1.154e-09	intronic	SLC2A9	0.396654	-0.148057	0.0280587	0.4146	-0.08928	8.697e-05	g__Lachnoanaerobaculum_LOGres_4:10003173	13131	-7.358	1.861e-13	---
s__Streptococcus_infantis_LOGres	rs1816224	12:11269256	A	C	0.3654	-0.06684	1.195e-09	intronic	PRB3	0.358806	-0.119545	0.0484042	0.349	-0.03692	0.1047	s__Streptococcus_infantis_LOGres_12:11269256	13242	-6.37	1.894e-10	---
s__Streptococcus_infantis_LOGres	rs4763659	12:11276999	A	G	0.3673	-0.0668	1.227e-09	intergenic	PRB3(dist=7292),PRB4(dist=30082)	0.359298	-0.119556	0.0483278	0.3506	-0.04005	0.0785	s__Streptococcus_infantis_LOGres_12:11276999	13239	-6.419	1.371e-10	---
s__Haemophilus_parahaemolyticus_HB	rs13381895	18:54405096	A	G	0.282	-0.2103	1.256e-09	intergenic	C18orf54(dist=23061),DYNAP(dist=182663)	0.2868	-0.2604	5.06e-06	0.2834	-0.06069	0.3919	s__Haemophilus_parahaemolyticus_HB_18:54405096	13306	-7.314	2.602e-13	---
g__Lachnoanaerobaculum_LOGres	rs35482941	4:10043720	TG	T	0.3769	-0.06718	1.259e-09	intergenic	SLC2A9(dist=3472),WDR1(dist=30619)	0.370941	-0.143374	0.0348691	0.3998	-0.08679	0.0001374	g__Lachnoanaerobaculum_LOGres_4:10043720	13128	-7.263	3.796e-13	---
PWY-7204_HB	rs7245059	18:54447892	A	G	0.3038	-0.2239	1.264e-09	intergenic	C18orf54(dist=65857),DYNAP(dist=139867)	0.3035	-0.3278	1.387e-06	0.2965	-0.1353	0.07914	PWY-7204_HB_18:54447892	12953	-7.795	6.453e-15	---
PWY-7204_HB	rs17475403	18:54506282	G	C	0.2982	-0.2271	1.267e-09	intergenic	C18orf54(dist=124247),DYNAP(dist=81477)	0.3032	-0.3567	1.977e-07	0.2969	-0.1164	0.1311	PWY-7204_HB_18:54506282	12961	-7.883	3.195e-15	---
PWY-7204_HB	rs1523867	18:54442818	A	G	0.3041	-0.2257	1.277e-09	intergenic	C18orf54(dist=60783),DYNAP(dist=144941)	0.3065	-0.327	1.372e-06	NA	NA	NA	PWY-7204_HB_18:54442818	11125	-7.699	1.367e-14	--?
g__Stomatobaculum_LOGres	rs6696797	1:103475156	A	G	0.3969	0.06772	1.307e-09	intronic	LOC101928436	0.404395	0.115761	0.204038	0.3901	-0.0006772	0.9767	g__Stomatobaculum_LOGres_1:103475156	12920	5.382	7.366e-08	++-
s__Haemophilus_parahaemolyticus_HB	rs2140497	18:54420495	G	A	0.2798	-0.2121	1.334e-09	intergenic	C18orf54(dist=38460),DYNAP(dist=167264)	0.2878	-0.2613	4.563e-06	0.2817	-0.06052	0.3975	s__Haemophilus_parahaemolyticus_HB_18:54420495	13311	-7.312	2.626e-13	---
s__GGB1611_SGB2208_HB	rs9271590	6:32623361	T	G	0.05827	-0.4313	1.363e-09	intergenic	HLA-DRB1(dist=33525),HLA-DQA1(dist=14045)	NA	NA	NA	NA	NA	NA	s__GGB1611_SGB2208_HB_6:32623361	8327	-6.06	1.363e-09	-??
g__Stomatobaculum_LOGres	chr1:103828699	1:103828699	G	GT	0.3859	0.06781	1.385e-09	intergenic	AMY1C(dist=70007),LOC100129138(dist=244324)	0.400658	0.146957	0.105725	0.397815	0.124731	0.202665	g__Stomatobaculum_LOGres_1:103828699	11003	6.003	1.934e-09	++?
s__Streptococcus_infantis_LOGres	rs386760370	12:11252718	T	C	0.4223	-0.06658	1.387e-09	intergenic	TAS2R42(dist=65781),PRB3(dist=13196)	0.411938	-0.0882036	0.132381	0.4036	-0.06084	0.007458	s__Streptococcus_infantis_LOGres_12:11252718	13242	-6.528	6.661e-11	---
g__Lachnoanaerobaculum_LOGres	rs11727418	4:10059360	T	C	0.3723	-0.067	1.391e-09	intergenic	SLC2A9(dist=19112),WDR1(dist=14979)	0.364054	-0.129101	0.0592386	0.3969	-0.09511	2.88e-05	g__Lachnoanaerobaculum_LOGres_4:10059360	13132	-7.284	3.23e-13	---
PWY-7204_HB	rs1523864	18:54456328	T	C	0.3084	-0.2233	1.422e-09	intergenic	C18orf54(dist=74293),DYNAP(dist=131431)	0.3098	-0.338	5.988e-07	0.3048	-0.1446	0.05658	PWY-7204_HB_18:54456328	12957	-7.916	2.446e-15	---
g__Candidatus_Nanosyncoccus_HB	rs4502681	4:9988548	C	T	0.3742	-0.196	1.423e-09	intronic	SLC2A9	0.3731	-0.0865	0.1085	0.4	-0.1953	0.003881	g__Candidatus_Nanosyncoccus_HB_4:9988548	13311	-6.657	2.804e-11	---
PWY-7204_HB	rs9960794	18:54501572	T	G	0.2937	-0.2278	1.494e-09	intergenic	C18orf54(dist=119537),DYNAP(dist=86187)	0.2988	-0.3631	1.415e-07	NA	NA	NA	PWY-7204_HB_18:54501572	11126	-7.905	2.682e-15	--?
s__Haemophilus_parahaemolyticus_HB	rs5825070	18:54374418	T	TTTAA	0.284	-0.2068	1.536e-09	intronic	C18orf54	0.2852	-0.2589	5.766e-06	0.2822	-0.0674	0.3447	s__Haemophilus_parahaemolyticus_HB_18:54374418	13297	-7.308	2.705e-13	---
g__Lachnoanaerobaculum_LOGres	rs13114090	4:9958275	T	G	0.371	-0.06682	1.538e-09	intronic	SLC2A9	0.367826	-0.117178	0.0891853	0.3887	-0.09671	2.103e-05	g__Lachnoanaerobaculum_LOGres_4:9958275	13133	-7.209	5.641e-13	---
s__Streptococcus_infantis_LOGres	rs1965067	12:11274624	T	G	0.3695	-0.06641	1.548e-09	intergenic	PRB3(dist=4917),PRB4(dist=32457)	0.359134	-0.120414	0.0467042	0.34739	-0.064937	0.189625	s__Streptococcus_infantis_LOGres_12:11274624	13047	-6.245	4.244e-10	---
s__Streptococcus_infantis_LOGres	rs1968355	12:11268787	A	G	0.3523	-0.06638	1.558e-09	intronic	PRB3	0.346507	-0.129563	0.0340188	0.3319	-0.02736	0.2293	s__Streptococcus_infantis_LOGres_12:11268787	13241	-6.246	4.222e-10	---
g__Stomatobaculum_LOGres	rs7417147	1:103473912	A	G	0.3914	0.06741	1.573e-09	intronic	LOC101928436	0.400131	0.137832	0.131228	0.3827	0.0003817	0.9869	g__Stomatobaculum_LOGres_1:103473912	12918	5.492	3.984e-08	+++
g__Lachnoanaerobaculum_LOGres	rs3775947	4:9993616	C	T	0.4024	-0.06674	1.612e-09	intronic	SLC2A9	0.398491	-0.12325	0.0679004	0.4216	-0.08842	0.0001012	g__Lachnoanaerobaculum_LOGres_4:9993616	13133	-7.123	1.053e-12	---
s__Haemophilus_parahaemolyticus_HB	rs9646557	18:54435796	A	G	0.2729	-0.2126	1.631e-09	intergenic	C18orf54(dist=53761),DYNAP(dist=151963)	0.2773	-0.2699	2.949e-06	0.2739	-0.03903	0.588	s__Haemophilus_parahaemolyticus_HB_18:54435796	13310	-7.214	5.428e-13	---
g__Stomatobaculum_LOGres	rs148132748	1:103453686	A	C	0.3952	0.0672	1.748e-09	intronic	LOC101928436	0.402263	0.10629	0.243232	0.3871	0.00796	0.7313	g__Stomatobaculum_LOGres_1:103453686	12920	5.436	5.435e-08	+++
s__Haemophilus_parahaemolyticus_HB	rs28599727	18:54409913	G	C	0.2813	-0.2096	1.775e-09	intergenic	C18orf54(dist=27878),DYNAP(dist=177846)	0.287	-0.2619	4.49e-06	0.2814	-0.05761	0.4205	s__Haemophilus_parahaemolyticus_HB_18:54409913	13311	-7.262	3.814e-13	---
PWY-7204_HB	rs12454284	18:54501049	G	C	0.298	-0.2253	1.778e-09	intergenic	C18orf54(dist=119014),DYNAP(dist=86710)	0.3029	-0.3596	1.626e-07	0.2962	-0.116	0.133	PWY-7204_HB_18:54501049	12961	-7.855	4.009e-15	---
g__Lachnoanaerobaculum_LOGres	rs34707376	4:9977277	A	G	0.3744	-0.06656	1.781e-09	intronic	SLC2A9	0.373073	-0.130337	0.0568549	0.395725	-0.169271	4.45826e-06	g__Lachnoanaerobaculum_LOGres_4:9977277	12936	-7.381	1.576e-13	---
g__Stomatobaculum_LOGres	rs12061189	1:103483951	A	G	0.3896	0.06717	1.793e-09	intronic	LOC101928436	0.398819	0.132289	0.147356	0.380952	0.10416	0.271266	g__Stomatobaculum_LOGres_1:103483951	12798	5.871	4.33e-09	+++
g__Candidatus_Nanosyncoccus_HB	rs12646380	4:9989878	C	T	0.3734	-0.1948	1.803e-09	intronic	SLC2A9	0.3727	-0.08402	0.1194	0.4	-0.1862	0.006048	g__Candidatus_Nanosyncoccus_HB_4:9989878	13310	-6.549	5.788e-11	---
g__Candidatus_Nanosyncoccus_HB	rs3775946	4:9993632	A	G	0.402	-0.1922	1.809e-09	intronic	SLC2A9	0.3973	-0.1141	0.0325	0.4198	-0.2142	0.001317	g__Candidatus_Nanosyncoccus_HB_4:9993632	13311	-7.005	2.474e-12	---
g__Candidatus_Nanosyncoccus_HB	rs3775947	4:9993616	C	T	0.4024	-0.1923	1.842e-09	intronic	SLC2A9	0.3985	-0.1113	0.03706	0.4216	-0.2077	0.001855	g__Candidatus_Nanosyncoccus_HB_4:9993616	13311	-6.939	3.948e-12	---
s__Haemophilus_parahaemolyticus_HB	rs7230262	18:54392472	G	A	0.2795	-0.2094	1.843e-09	intergenic	C18orf54(dist=10437),DYNAP(dist=195287)	0.2853	-0.2609	5.008e-06	0.2791	-0.06636	0.3556	s__Haemophilus_parahaemolyticus_HB_18:54392472	13310	-7.291	3.07e-13	---
s__Haemophilus_parahaemolyticus_HB	rs11873696	18:54402488	C	T	0.2827	-0.2077	1.865e-09	intergenic	C18orf54(dist=20453),DYNAP(dist=185271)	0.287	-0.2621	4.43e-06	0.281124	-0.00396083	0.957463	s__Haemophilus_parahaemolyticus_HB_18:54402488	13119	-7.02	2.222e-12	---
s__Haemophilus_parahaemolyticus_HB	rs4616369	18:54574203	C	T	0.2999	-0.2033	1.865e-09	intergenic	C18orf54(dist=192168),DYNAP(dist=13556)	0.2994	-0.2091	0.0002306	0.296785	-0.0714208	0.335627	s__Haemophilus_parahaemolyticus_HB_18:54574203	13115	-6.914	4.711e-12	---
g__Lachnoanaerobaculum_LOGres	rs12511989	4:10050034	A	G	0.3777	-0.06646	1.889e-09	intergenic	SLC2A9(dist=9786),WDR1(dist=24305)	0.370613	-0.142722	0.035643	0.3995	-0.09247	4.777e-05	g__Lachnoanaerobaculum_LOGres_4:10050034	13132	-7.304	2.789e-13	---
g__Stomatobaculum_LOGres	rs7553516	1:103477080	T	G	0.3913	0.067	1.958e-09	intronic	LOC101928436	0.398327	0.138489	0.128817	0.3817	0.003052	0.8953	g__Stomatobaculum_LOGres_1:103477080	12921	5.512	3.542e-08	+++
s__Streptococcus_infantis_LOGres	rs7488939	12:11221102	A	G	0.3297	-0.06595	1.985e-09	intergenic	TAS2R42(dist=34165),PRB3(dist=44812)	0.323385	-0.112415	0.0677147	0.3182	-0.03595	0.1142	s__Streptococcus_infantis_LOGres_12:11221102	13241	-6.218	5.029e-10	---
PWY-7204_HB	rs1942995	18:54502955	A	G	0.2978	-0.2246	1.989e-09	intergenic	C18orf54(dist=120920),DYNAP(dist=84804)	0.3029	-0.3596	1.626e-07	0.2969	-0.122	0.1141	PWY-7204_HB_18:54502955	12961	-7.87	3.561e-15	---
g__Candidatus_Nanosyncoccus_HB	rs16868271	4:9987423	G	A	0.374	-0.1941	1.992e-09	intronic	SLC2A9	0.3729	-0.0873	0.1055	0.3997	-0.1915	0.004553	g__Candidatus_Nanosyncoccus_HB_4:9987423	13311	-6.601	4.089e-11	---
s__Haemophilus_parahaemolyticus_HB	rs12966028	18:54416858	G	A	0.2719	-0.2116	2.007e-09	intergenic	C18orf54(dist=34823),DYNAP(dist=170901)	0.2781	-0.269	3.081e-06	0.2735	-0.06184	0.3909	s__Haemophilus_parahaemolyticus_HB_18:54416858	13310	-7.303	2.804e-13	---
g__Candidatus_Nanosyncoccus_HB	chr4:10000107	4:10000107	C	CTCTT	0.3742	-0.1943	2.013e-09	intronic	SLC2A9	0.3732	-0.0897	0.09666	0.3999	-0.1908	0.004702	g__Candidatus_Nanosyncoccus_HB_4:10000107	13310	-6.616	3.694e-11	---
g__Candidatus_Nanosyncoccus_HB	rs3775948	4:9993558	G	C	0.4015	-0.1916	2.031e-09	intronic	SLC2A9	0.3973	-0.1167	0.02886	0.4214	-0.2174	0.001097	g__Candidatus_Nanosyncoccus_HB_4:9993558	13311	-7.032	2.03e-12	---
s__Haemophilus_parahaemolyticus_HB	rs35367184	18:54363585	G	A	0.2817	-0.2076	2.047e-09	intronic	C18orf54	0.2855	-0.2621	4.463e-06	0.2817	-0.08314	0.2466	s__Haemophilus_parahaemolyticus_HB_18:54363585	13305	-7.379	1.593e-13	---
g__Lachnoanaerobaculum_LOGres	rs4502681	4:9988548	C	T	0.3742	-0.06628	2.08e-09	intronic	SLC2A9	0.373073	-0.111377	0.102484	0.4	-0.0905	6.916e-05	g__Lachnoanaerobaculum_LOGres_4:9988548	13133	-7.033	2.021e-12	---
s__Granulicatella_SGB8239_HB	rs2071699	19:48751247	A	G	0.29	-0.2066	2.1e-09	exonic	FUT1	0.284	-0.09393	0.112	0.283	-0.1124	0.1188	s__Granulicatella_SGB8239_HB_19:48751247	13306	-6.093	1.106e-09	---
g__Candidatus_Nanosyncoccus_HB	rs73100632	4:9987730	C	G	0.3721	-0.1935	2.105e-09	intronic	SLC2A9	0.3729	-0.08765	0.1041	0.3986	-0.1875	0.005482	g__Candidatus_Nanosyncoccus_HB_4:9987730	13305	-6.574	4.903e-11	---
s__Haemophilus_parahaemolyticus_HB	rs2118288	18:54383944	A	G	0.2798	-0.2093	2.105e-09	intergenic	C18orf54(dist=1909),DYNAP(dist=203815)	0.2857	-0.2636	3.956e-06	0.2799	-0.07439	0.2995	s__Haemophilus_parahaemolyticus_HB_18:54383944	13311	-7.341	2.118e-13	---
s__GGB1611_SGB2208_HB	rs77514798	6:32644011	A	G	0.05808	-0.4275	2.157e-09	downstream	HLA-DQA1(dist=359)	0.0574	-0.485	3.508e-05	0.05982	-0.245	0.07856	s__GGB1611_SGB2208_HB_6:32644011	13267	-7.385	1.524e-13	---
g__Lachnoanaerobaculum_LOGres	rs3775946	4:9993632	A	G	0.402	-0.06619	2.183e-09	intronic	SLC2A9	0.397343	-0.126388	0.0611683	0.4198	-0.09	7.581e-05	g__Lachnoanaerobaculum_LOGres_4:9993632	13133	-7.134	9.767e-13	---
g__Stomatobaculum_LOGres	rs12945461	1:103484591	G	A	0.3871	0.06677	2.232e-09	intronic	LOC101928436	0.398819	0.132289	0.147356	0.3818	0.006539	0.7779	g__Stomatobaculum_LOGres_1:103484591	12916	5.519	3.412e-08	+++
s__Haemophilus_parahaemolyticus_HB	rs9646525	18:54435451	G	C	0.2734	-0.209	2.268e-09	intergenic	C18orf54(dist=53416),DYNAP(dist=152308)	0.2771	-0.2651	4.394e-06	0.2735	-0.04357	0.5459	s__Haemophilus_parahaemolyticus_HB_18:54435451	13310	-7.156	8.319e-13	---
s__Haemophilus_parahaemolyticus_HB	rs7229060	18:54414595	G	A	0.2814	-0.207	2.328e-09	intergenic	C18orf54(dist=32560),DYNAP(dist=173164)	0.2868	-0.2565	6.844e-06	0.2821	-0.06873	0.3357	s__Haemophilus_parahaemolyticus_HB_18:54414595	13309	-7.245	4.334e-13	---
s__Actinomyces_SGB17157_HB	rs17768428	9:9445270	T	G	0.05087	0.4378	2.409e-09	intronic	PTPRD	0.04724	-0.04621	0.7056	0.0567	0.1289	0.3623	s__Actinomyces_SGB17157_HB_9:9445270	13310	4.887	1.025e-06	+-+
g__Stomatobaculum_LOGres	chr1:103525115	1:103525115	T	TAC	0.4243	0.06669	2.424e-09	intronic	LOC101928436	0.432206	0.180109	0.0470661	NA	NA	NA	g__Stomatobaculum_LOGres_1:103525115	11035	6.12	9.361e-10	++?
g__Lachnoanaerobaculum_LOGres	rs16892069	4:10003225	C	T	0.3719	-0.066	2.428e-09	intronic	SLC2A9	0.371269	-0.129757	0.0568096	0.3951	-0.08143	0.0003448	g__Lachnoanaerobaculum_LOGres_4:10003225	13133	-6.991	2.733e-12	---
GLYCOGENSYNTH-PWY_LOGres	rs6811914	4:184454784	C	T	0.3791	-0.0663	2.436e-09	intronic	IRF2	0.373355	0.00117553	0.916061	0.3746	-0.03403	0.145	GLYCOGENSYNTH-PWY_LOGres_4:184454784	12956	-5.209	1.899e-07	-+-
g__Lachnoanaerobaculum_LOGres	rs12512525	4:10071411	C	A	0.3765	-0.06597	2.464e-09	intergenic	SLC2A9(dist=31163),WDR1(dist=2928)	0.367826	-0.124098	0.0696612	0.4008	-0.09218	5.047e-05	g__Lachnoanaerobaculum_LOGres_4:10071411	13133	-7.127	1.026e-12	---
s__Haemophilus_parahaemolyticus_HB	rs2118285	18:54407571	A	G	0.2722	-0.2104	2.472e-09	intergenic	C18orf54(dist=25536),DYNAP(dist=180188)	0.2776	-0.269	3.117e-06	0.2731	-0.06737	0.3507	s__Haemophilus_parahaemolyticus_HB_18:54407571	13310	-7.304	2.784e-13	---
g__Stomatobaculum_LOGres	rs6663215	1:103475688	G	A	0.3907	0.06656	2.487e-09	intronic	LOC101928436	0.398983	0.132626	0.146138	0.3824	0.008941	0.6998	g__Stomatobaculum_LOGres_1:103475688	12919	5.547	2.912e-08	+++
s__Haemophilus_parahaemolyticus_HB	rs4635403	18:54421602	G	A	0.2805	-0.2077	2.547e-09	intergenic	C18orf54(dist=39567),DYNAP(dist=166157)	0.2878	-0.2586	5.688e-06	0.282	-0.06362	0.3724	s__Haemophilus_parahaemolyticus_HB_18:54421602	13310	-7.225	5.022e-13	---
s__Haemophilus_parahaemolyticus_HB	rs1523868	18:54436456	C	T	0.2733	-0.21	2.564e-09	intergenic	C18orf54(dist=54421),DYNAP(dist=151303)	0.2775	-0.2673	3.539e-06	0.2745	-0.05126	0.477	s__Haemophilus_parahaemolyticus_HB_18:54436456	13311	-7.202	5.919e-13	---
s__Haemophilus_parahaemolyticus_HB	rs756875760	18:54375893	GCTTAGA	G	0.2814	-0.2069	2.584e-09	intronic	C18orf54	0.2855	-0.2619	4.522e-06	0.2807	-0.06211	0.3832	s__Haemophilus_parahaemolyticus_HB_18:54375893	13306	-7.239	4.533e-13	---
s__GGB1611_SGB2208_HB	rs75490552	6:32421775	G	A	0.05981	-0.4189	2.594e-09	intergenic	LOC101929163(dist=14046),HLA-DRA(dist=18067)	0.06232	-0.4785	2.277e-05	0.06063	-0.2297	0.09774	s__GGB1611_SGB2208_HB_6:32421775	13309	-7.369	1.715e-13	---
g__Candidatus_Nanosyncoccus_HB	rs3733588	4:9995679	G	A	0.401	-0.1904	2.621e-09	intronic	SLC2A9	0.3985	-0.1133	0.03348	0.4211	-0.2318	0.0005195	g__Candidatus_Nanosyncoccus_HB_4:9995679	13311	-7.05	1.792e-12	---
s__Haemophilus_parahaemolyticus_HB	rs1657910	18:54366048	G	T	0.2757	-0.2068	2.659e-09	intronic	C18orf54	0.2775	-0.2681	3.38e-06	0.2763	-0.08189	0.2534	s__Haemophilus_parahaemolyticus_HB_18:54366048	13309	-7.367	1.748e-13	---
s__GGB1611_SGB2208_HB	rs117309689	6:32448037	T	C	0.06003	-0.4174	2.663e-09	intergenic	HLA-DRA(dist=2986),HLA-DRB5(dist=69340)	0.06264	-0.476	2.413e-05	0.06082	-0.2393	0.08438	s__GGB1611_SGB2208_HB_6:32448037	13311	-7.386	1.512e-13	---
s__Haemophilus_parahaemolyticus_HB	rs1573406	18:54398970	T	C	0.2798	-0.2076	2.664e-09	intergenic	C18orf54(dist=16935),DYNAP(dist=188789)	0.2857	-0.2575	6.585e-06	0.2789	-0.07992	0.2655	s__Haemophilus_parahaemolyticus_HB_18:54398970	13311	-7.289	3.134e-13	---
g__Candidatus_Nanosyncoccus_HB	rs16891926	4:9995228	T	G	0.3743	-0.1928	2.685e-09	intronic	SLC2A9	0.3736	-0.08954	0.09714	0.3995	-0.197	0.003537	g__Candidatus_Nanosyncoccus_HB_4:9995228	13311	-6.612	3.795e-11	---
g__Candidatus_Nanosyncoccus_HB	rs16891923	4:9995037	A	C	0.3744	-0.1927	2.724e-09	intronic	SLC2A9	0.3736	-0.08954	0.09714	0.3989	-0.1969	0.003598	g__Candidatus_Nanosyncoccus_HB_4:9995037	13309	-6.608	3.898e-11	---
s__Lachnoanaerobaculum_sp_ICM7_HB	rs28730480	4:10047243	C	T	0.4043	-0.188	2.743e-09	intergenic	SLC2A9(dist=6995),WDR1(dist=27096)	0.3955	-0.2116	6.059e-05	0.4221	-0.2597	0.0001081	s__Lachnoanaerobaculum_sp_ICM7_HB_4:10047243	13307	-8.099	5.561e-16	---
s__Haemophilus_parahaemolyticus_HB	rs10502988	18:54390751	A	T	0.2713	-0.2102	2.808e-09	intergenic	C18orf54(dist=8716),DYNAP(dist=197008)	0.277	-0.2668	3.799e-06	0.2706	-0.07986	0.2701	s__Haemophilus_parahaemolyticus_HB_18:54390751	13311	-7.333	2.253e-13	---
g__Candidatus_Nanosyncoccus_HB	rs35933067	4:9998884	G	A	0.3755	-0.1921	2.83e-09	intronic	SLC2A9	0.3737	-0.08784	0.1034	0.4007	-0.1895	0.005031	g__Candidatus_Nanosyncoccus_HB_4:9998884	13310	-6.548	5.833e-11	---
s__GGB1611_SGB2208_HB	rs117076508	6:32421756	C	T	0.05982	-0.4169	2.837e-09	intergenic	LOC101929163(dist=14027),HLA-DRA(dist=18086)	0.06248	-0.4826	1.912e-05	0.0606	-0.2292	0.0984	s__GGB1611_SGB2208_HB_6:32421756	13309	-7.375	1.643e-13	---
s__Haemophilus_parahaemolyticus_HB	rs8085175	18:54421834	G	A	0.2805	-0.2069	2.873e-09	intergenic	C18orf54(dist=39799),DYNAP(dist=165925)	0.2878	-0.2586	5.688e-06	0.2808	-0.06409	0.3714	s__Haemophilus_parahaemolyticus_HB_18:54421834	13308	-7.21	5.58e-13	---
PWY-7204_HB	rs10164159	18:54505035	A	G	0.2978	-0.2223	2.889e-09	intergenic	C18orf54(dist=123000),DYNAP(dist=82724)	0.3031	-0.3602	1.526e-07	0.2959	-0.1123	0.1453	PWY-7204_HB_18:54505035	12960	-7.781	7.222e-15	---
s__Haemophilus_parahaemolyticus_HB	rs2083059	18:54403500	T	G	0.2711	-0.2098	2.903e-09	intergenic	C18orf54(dist=21465),DYNAP(dist=184259)	0.2778	-0.2707	2.719e-06	0.270797	-0.00785779	0.916791	s__Haemophilus_parahaemolyticus_HB_18:54403500	13120	-7.03	2.072e-12	---
s__Haemophilus_parahaemolyticus_HB	rs3826581	18:54406829	G	T	0.2811	-0.2068	2.912e-09	intergenic	C18orf54(dist=24794),DYNAP(dist=180930)	0.287	-0.2619	4.49e-06	0.2829	-0.06893	0.3333	s__Haemophilus_parahaemolyticus_HB_18:54406829	13309	-7.26	3.869e-13	---
g__Candidatus_Nanosyncoccus_HB	rs71603977	4:9947762	C	T	0.3765	-0.1917	2.914e-09	intronic	SLC2A9	0.3708	-0.09044	0.09688	0.392	-0.1716	0.01076	g__Candidatus_Nanosyncoccus_HB_4:9947762	13310	-6.462	1.032e-10	---
s__Haemophilus_parahaemolyticus_HB	rs9946653	18:54400896	C	T	0.2835	-0.204	2.922e-09	intergenic	C18orf54(dist=18861),DYNAP(dist=186863)	0.2867	-0.2595	5.556e-06	0.279977	-0.00996246	0.893685	s__Haemophilus_parahaemolyticus_HB_18:54400896	13118	-6.968	3.22e-12	---
g__Candidatus_Nanosyncoccus_HB	rs13118801	4:9996192	C	T	0.3746	-0.1923	2.924e-09	intronic	SLC2A9	0.3739	-0.0889	0.09918	0.3995	-0.1892	0.005165	g__Candidatus_Nanosyncoccus_HB_4:9996192	13311	-6.55	5.746e-11	---
g__Candidatus_Nanosyncoccus_HB	rs66647240	4:9989034	A	C	0.3734	-0.1923	2.945e-09	intronic	SLC2A9	0.3726	-0.08512	0.1146	0.3979	-0.2008	0.003045	g__Candidatus_Nanosyncoccus_HB_4:9989034	13311	-6.579	4.742e-11	---
g__Candidatus_Nanosyncoccus_HB	rs13101688	4:9951387	C	G	0.3752	-0.1917	2.949e-09	intronic	SLC2A9	0.3686	-0.08207	0.1316	0.3902	-0.1727	0.01002	g__Candidatus_Nanosyncoccus_HB_4:9951387	13311	-6.397	1.582e-10	---
g__Lachnoanaerobaculum_LOGres	rs6836961	4:10063200	A	C	0.3752	-0.06565	2.952e-09	intergenic	SLC2A9(dist=22952),WDR1(dist=11139)	0.367006	-0.136482	0.0456866	0.3997	-0.09421	3.422e-05	g__Lachnoanaerobaculum_LOGres_4:10063200	13132	-7.227	4.942e-13	---
g__Candidatus_Nanosyncoccus_HB	rs34407859	4:10000028	T	C	0.3747	-0.1922	2.993e-09	intronic	SLC2A9	0.3739	-0.09453	0.08001	0.4005	-0.1949	0.003887	g__Candidatus_Nanosyncoccus_HB_4:10000028	13311	-6.63	3.347e-11	---
PWY-6353_LOGres	rs3796831	4:10014328	G	C	0.3796	-0.06635	3.012e-09	intronic	SLC2A9	0.373102	-0.0636495	0.0221465	0.4044	-0.08249	0.0004197	PWY-6353_LOGres_4:10014328	12764	-7.124	1.045e-12	---
g__Candidatus_Nanosyncoccus_HB	rs13141527	4:9997595	A	G	0.3733	-0.1916	3.021e-09	intronic	SLC2A9	0.3739	-0.0889	0.09918	0.3997	-0.1998	0.003103	g__Candidatus_Nanosyncoccus_HB_4:9997595	13309	-6.607	3.917e-11	---
g__Candidatus_Nanosyncoccus_HB	rs13101772	4:9996100	A	C	0.3745	-0.1921	3.029e-09	intronic	SLC2A9	0.3737	-0.08713	0.106	0.3997	-0.2002	0.003103	g__Candidatus_Nanosyncoccus_HB_4:9996100	13311	-6.591	4.357e-11	---
s__Haemophilus_parahaemolyticus_HB	rs12961924	18:54416490	T	A	0.2726	-0.2092	3.036e-09	intergenic	C18orf54(dist=34455),DYNAP(dist=171269)	0.278	-0.2682	3.282e-06	0.2737	-0.05996	0.4055	s__Haemophilus_parahaemolyticus_HB_18:54416490	13311	-7.234	4.693e-13	---
s__Haemophilus_parahaemolyticus_HB	rs774688999	18:54364706	TC	T	0.2797	-0.2069	3.038e-09	intronic	C18orf54	0.2855	-0.2621	4.463e-06	0.2812	-0.08112	0.2582	s__Haemophilus_parahaemolyticus_HB_18:54364706	13310	-7.317	2.532e-13	---
s__Haemophilus_parahaemolyticus_HB	rs1523873	18:54420780	A	G	0.281	-0.207	3.054e-09	intergenic	C18orf54(dist=38745),DYNAP(dist=166979)	0.2896	-0.2634	3.594e-06	0.2822	-0.06597	0.3558	s__Haemophilus_parahaemolyticus_HB_18:54420780	13311	-7.259	3.898e-13	---
s__Haemophilus_parahaemolyticus_HB	rs1523861	18:54433168	C	T	0.2823	-0.2048	3.089e-09	intergenic	C18orf54(dist=51133),DYNAP(dist=154591)	0.2886	-0.2499	1.134e-05	0.2822	-0.04607	0.5195	s__Haemophilus_parahaemolyticus_HB_18:54433168	13308	-7.035	1.994e-12	---
s__Streptococcus_infantis_LOGres	chr12:11274455	12:11274455	TGAGAGA	T	0.4294	-0.06524	3.094e-09	intergenic	PRB3(dist=4748),PRB4(dist=32626)	0.371719	-0.105388	0.078732	NA	NA	NA	s__Streptococcus_infantis_LOGres_12:11274455	11286	-5.977	2.272e-09	--?
s__Haemophilus_parahaemolyticus_HB	rs1554582	18:54398312	G	A	0.2789	-0.2072	3.109e-09	intergenic	C18orf54(dist=16277),DYNAP(dist=189447)	0.2857	-0.2575	6.585e-06	0.2794	-0.07079	0.3241	s__Haemophilus_parahaemolyticus_HB_18:54398312	13311	-7.22	5.203e-13	---
s__GGB1611_SGB2208_HB	chr6:32485493	6:32485493	G	GT	0.06007	-0.4163	3.122e-09	intergenic	HLA-DRA(dist=40442),HLA-DRB5(dist=31884)	0.05862	-0.472	4.756e-05	nan	#NAME?	NA	s__GGB1611_SGB2208_HB_6:32485493	11373	-7.175	7.243e-13	--?
g__Lachnoanaerobaculum_LOGres	rs3775949	4:9986043	G	T	0.3758	-0.06554	3.126e-09	intronic	SLC2A9	0.373073	-0.111427	0.102328	0.401	-0.08439	0.0002084	g__Lachnoanaerobaculum_LOGres_4:9986043	13132	-6.877	6.108e-12	---
s__Haemophilus_parahaemolyticus_HB	rs34220352	18:54373320	A	T	0.2713	-0.2094	3.13e-09	intronic	C18orf54	0.2773	-0.2664	3.875e-06	0.2735	-0.07369	0.3089	s__Haemophilus_parahaemolyticus_HB_18:54373320	13311	-7.284	3.234e-13	---
g__Lachnoanaerobaculum_LOGres	rs6849736	4:9985159	A	G	0.3743	-0.06553	3.156e-09	intronic	SLC2A9	0.372253	-0.111758	0.101733	0.3999	-0.08644	0.0001452	g__Lachnoanaerobaculum_LOGres_4:9985159	13131	-6.912	4.782e-12	---
s__Haemophilus_parahaemolyticus_HB	rs6508295	18:54412841	A	G	0.2808	-0.2061	3.166e-09	intergenic	C18orf54(dist=30806),DYNAP(dist=174918)	0.2865	-0.2577	6.407e-06	0.2816	-0.06054	0.3973	s__Haemophilus_parahaemolyticus_HB_18:54412841	13309	-7.167	7.651e-13	---
s__Haemophilus_parahaemolyticus_HB	rs940310	18:54388911	C	A	0.2712	-0.2093	3.194e-09	intergenic	C18orf54(dist=6876),DYNAP(dist=198848)	0.2768	-0.2652	4.325e-06	0.2703	-0.07269	0.3155	s__Haemophilus_parahaemolyticus_HB_18:54388911	13308	-7.266	3.703e-13	---
s__Haemophilus_parahaemolyticus_HB	rs3753057	18:54378128	A	G	0.271	-0.2094	3.231e-09	intronic	C18orf54	0.2773	-0.2664	3.875e-06	0.272	-0.08816	0.2233	s__Haemophilus_parahaemolyticus_HB_18:54378128	13308	-7.357	1.886e-13	---
s__Haemophilus_parahaemolyticus_HB	rs8084179	18:54388127	T	C	0.2805	-0.2062	3.235e-09	intergenic	C18orf54(dist=6092),DYNAP(dist=199632)	0.2855	-0.2592	5.776e-06	0.2812	-0.07191	0.3152	s__Haemophilus_parahaemolyticus_HB_18:54388127	13311	-7.235	4.656e-13	---
s__Haemophilus_parahaemolyticus_HB	rs4430819	18:54376456	T	C	0.2808	-0.2057	3.263e-09	intronic	C18orf54	0.2852	-0.2589	5.766e-06	0.279403	-0.0101948	0.891355	s__Haemophilus_parahaemolyticus_HB_18:54376456	13117	-6.951	3.637e-12	---
s__Haemophilus_parahaemolyticus_HB	chr18:54371214	18:54371214	AG	A	0.2808	-0.2054	3.319e-09	intronic	C18orf54	0.2855	-0.2621	4.452e-06	0.2803	-0.07039	0.3271	s__Haemophilus_parahaemolyticus_HB_18:54371214	13309	-7.249	4.209e-13	---
g__Candidatus_Nanosyncoccus_HB	rs3775949	4:9986043	G	T	0.3758	-0.1917	3.337e-09	intronic	SLC2A9	0.3731	-0.08542	0.113	0.401	-0.1807	0.007588	g__Candidatus_Nanosyncoccus_HB_4:9986043	13310	-6.454	1.089e-10	---
s__GGB1611_SGB2208_HB	rs114637082	6:32424505	A	T	0.05904	-0.4156	3.364e-09	intergenic	LOC101929163(dist=16776),HLA-DRA(dist=15337)	0.06232	-0.477	2.41e-05	0.05931	-0.2406	0.08584	s__GGB1611_SGB2208_HB_6:32424505	13299	-7.353	1.94e-13	---
SALVADEHYPOX-PWY_LOGres	rs3796831	4:10014328	G	C	0.3796	-0.06614	3.373e-09	intronic	SLC2A9	0.373102	-0.0654704	0.0254676	0.4044	-0.08145	0.0004956	SALVADEHYPOX-PWY_LOGres_4:10014328	12764	-7.067	1.581e-12	---
s__Haemophilus_parahaemolyticus_HB	rs1523859	18:54432835	G	C	0.2727	-0.2085	3.383e-09	intergenic	C18orf54(dist=50800),DYNAP(dist=154924)	0.2773	-0.2589	6.958e-06	0.2732	-0.05499	0.4466	s__Haemophilus_parahaemolyticus_HB_18:54432835	13309	-7.118	1.096e-12	---
s__GGB1611_SGB2208_HB	rs74570580	6:32619787	C	T	0.0579	-0.4183	3.399e-09	intergenic	HLA-DRB1(dist=29951),HLA-DQA1(dist=17619)	0.05871	-0.5102	1.019e-05	0.05879	-0.2654	0.0589	s__GGB1611_SGB2208_HB_6:32619787	13307	-7.508	6.015e-14	---
g__Stomatobaculum_LOGres	rs1150075	1:103614754	G	A	0.3901	0.06599	3.426e-09	intergenic	AMY2B(dist=35220),AMY2A(dist=2578)	0.39554	0.147141	0.109185	0.3835	-0.004591	0.843	g__Stomatobaculum_LOGres_1:103614754	12919	5.355	8.545e-08	++-
g__Lachnoanaerobaculum_LOGres	rs3733590	4:9985602	C	T	0.375	-0.06537	3.449e-09	intronic	SLC2A9	0.372745	-0.112685	0.0988648	0.4004	-0.08823	0.0001057	g__Lachnoanaerobaculum_LOGres_4:9985602	13131	-6.937	4.01e-12	---
s__Haemophilus_parahaemolyticus_HB	rs11281619	18:54419820	A	ATTGCTAAG	0.2822	-0.2043	3.451e-09	intergenic	C18orf54(dist=37785),DYNAP(dist=167939)	0.2941	-0.2638	3.409e-06	0.284	-0.06397	0.3672	s__Haemophilus_parahaemolyticus_HB_18:54419820	13308	-7.24	4.489e-13	---
s__Haemophilus_parahaemolyticus_HB	rs6508290	18:54362686	A	G	0.2795	-0.2062	3.481e-09	intronic	C18orf54	0.2855	-0.2621	4.463e-06	0.2816	-0.07264	0.3099	s__Haemophilus_parahaemolyticus_HB_18:54362686	13310	-7.256	3.995e-13	---
s__Haemophilus_parahaemolyticus_HB	rs8083951	18:54388463	G	A	0.28	-0.2061	3.514e-09	intergenic	C18orf54(dist=6428),DYNAP(dist=199296)	0.2857	-0.2606	5.13e-06	0.2806	-0.08217	0.2517	s__Haemophilus_parahaemolyticus_HB_18:54388463	13310	-7.29	3.09e-13	---
s__Haemophilus_parahaemolyticus_HB	rs7243269	18:54460008	A	G	0.2892	-0.2013	3.52e-09	intergenic	C18orf54(dist=77973),DYNAP(dist=127751)	0.2909	-0.3331	5.247e-09	0.2859	-0.1095	0.1284	s__Haemophilus_parahaemolyticus_HB_18:54460008	13307	-8.045	8.59e-16	---
s__GGB1611_SGB2208_HB	rs141144670	6:32422707	T	C	0.0594	-0.4155	3.558e-09	intergenic	LOC101929163(dist=14978),HLA-DRA(dist=17135)	0.06232	-0.477	2.41e-05	0.0590935	-0.296483	0.0362147	s__GGB1611_SGB2208_HB_6:32422707	13118	-7.503	6.252e-14	---
s__Haemophilus_parahaemolyticus_HB	rs3744852	18:54407226	T	G	0.2798	-0.2063	3.56e-09	intergenic	C18orf54(dist=25191),DYNAP(dist=180533)	0.2867	-0.2593	5.629e-06	0.2807	-0.06073	0.3974	s__Haemophilus_parahaemolyticus_HB_18:54407226	13311	-7.165	7.787e-13	---
s__Haemophilus_parahaemolyticus_HB	rs4611533	18:54437697	C	T	0.2815	-0.2056	3.6e-09	intergenic	C18orf54(dist=55662),DYNAP(dist=150062)	0.2875	-0.2565	6.892e-06	0.2838	-0.0516	0.4714	s__Haemophilus_parahaemolyticus_HB_18:54437697	13311	-7.095	1.295e-12	---
s__Haemophilus_parahaemolyticus_HB	rs12967052	18:54417263	A	G	0.272	-0.2084	3.654e-09	intergenic	C18orf54(dist=35228),DYNAP(dist=170496)	0.2776	-0.2685	3.192e-06	0.2735	-0.07321	0.3086	s__Haemophilus_parahaemolyticus_HB_18:54417263	13310	-7.284	3.252e-13	---
s__Haemophilus_parahaemolyticus_HB	rs2164716	18:54391244	G	A	0.2792	-0.2061	3.666e-09	intergenic	C18orf54(dist=9209),DYNAP(dist=196515)	0.2857	-0.2575	6.606e-06	0.2804	-0.07414	0.2999	s__Haemophilus_parahaemolyticus_HB_18:54391244	13311	-7.217	5.3e-13	---
s__Haemophilus_parahaemolyticus_HB	rs1554581	18:54398495	G	A	0.2788	-0.2063	3.729e-09	intergenic	C18orf54(dist=16460),DYNAP(dist=189264)	0.2857	-0.2575	6.585e-06	0.2791	-0.0665	0.3547	s__Haemophilus_parahaemolyticus_HB_18:54398495	13311	-7.173	7.33e-13	---
s__Haemophilus_parahaemolyticus_HB	chr18:54406745	18:54406745	GTT	G	0.281	-0.2053	3.75e-09	intergenic	C18orf54(dist=24710),DYNAP(dist=181014)	NA	NA	NA	NA	NA	NA	NULL
s__Haemophilus_parahaemolyticus_HB	rs1954897	18:54421013	G	T	0.2801	-0.2057	3.789e-09	intergenic	C18orf54(dist=38978),DYNAP(dist=166746)	0.2878	-0.2614	4.472e-06	0.2809	-0.06388	0.3728	s__Haemophilus_parahaemolyticus_HB_18:54421013	13311	-7.197	6.157e-13	---
g__Lachnoanaerobaculum_LOGres	rs12646380	4:9989878	C	T	0.3734	-0.06519	3.805e-09	intronic	SLC2A9	0.372745	-0.110342	0.106083	0.4	-0.08844	0.000101	g__Lachnoanaerobaculum_LOGres_4:9989878	13132	-6.912	4.779e-12	---
s__Haemophilus_parahaemolyticus_HB	rs1866036	18:54398729	A	G	0.279	-0.2061	3.812e-09	intergenic	C18orf54(dist=16694),DYNAP(dist=189030)	0.2857	-0.2575	6.585e-06	0.2791	-0.07776	0.28	s__Haemophilus_parahaemolyticus_HB_18:54398729	13311	-7.229	4.856e-13	---
g__Candidatus_Nanosyncoccus_HB	rs6849736	4:9985159	A	G	0.3743	-0.1908	3.842e-09	intronic	SLC2A9	0.3723	-0.08518	0.1145	0.3999	-0.19	0.004995	g__Candidatus_Nanosyncoccus_HB_4:9985159	13309	-6.485	8.877e-11	---
g__Candidatus_Nanosyncoccus_HB	rs36058283	4:10006888	A	C	0.3724	-0.1909	3.919e-09	intronic	SLC2A9	0.3726	-0.09602	0.07464	0.3956	-0.1838	0.006543	g__Candidatus_Nanosyncoccus_HB_4:10006888	13310	-6.547	5.886e-11	---
g__Candidatus_Nanosyncoccus_HB	rs6836200	4:9985291	C	T	0.3748	-0.1907	3.92e-09	intronic	SLC2A9	0.3723	-0.08518	0.1145	0.4002	-0.1885	0.005401	g__Candidatus_Nanosyncoccus_HB_4:9985291	13310	-6.473	9.626e-11	---
s__Haemophilus_parahaemolyticus_HB	rs12458284	18:54386900	G	A	0.272	-0.2081	3.931e-09	intergenic	C18orf54(dist=4865),DYNAP(dist=200859)	0.2771	-0.2653	4.31e-06	0.2724	-0.08322	0.2493	s__Haemophilus_parahaemolyticus_HB_18:54386900	13311	-7.295	2.981e-13	---
GLYOXYLATE-BYPASS_HB	rs2436015	13:47064137	T	A	0.4764	-0.1848	3.942e-09	intergenic	HTR2A(dist=167061),LINC00562(dist=866016)	0.4888	-0.04549	0.3895	0.4719	0.0242	0.7174	GLYOXYLATE-BYPASS_HB_13:47064137	12956	-4.93	8.229e-07	--+
g__Candidatus_Nanosyncoccus_HB	rs4529048	4:9995488	C	A	0.4017	-0.1882	3.971e-09	intronic	SLC2A9	0.399	-0.1121	0.03563	0.4214	-0.2258	0.0007337	g__Candidatus_Nanosyncoccus_HB_4:9995488	13310	-6.948	3.709e-12	---
s__Haemophilus_parahaemolyticus_HB	rs9950152	18:54366962	G	A	0.2795	-0.205	4.007e-09	intronic	C18orf54	0.2853	-0.2606	5.044e-06	0.2808	-0.08123	0.2578	s__Haemophilus_parahaemolyticus_HB_18:54366962	13310	-7.269	3.612e-13	---
s__Haemophilus_parahaemolyticus_HB	rs11872614	18:54373144	A	G	0.279	-0.2056	4.029e-09	intronic	C18orf54	0.2852	-0.2589	5.766e-06	0.2809	-0.0738	0.303	s__Haemophilus_parahaemolyticus_HB_18:54373144	13311	-7.216	5.342e-13	---
g__Stomatobaculum_LOGres	rs10158225	1:103487999	C	T	0.3913	0.06569	4.031e-09	intronic	LOC101928436	0.398655	0.130848	0.152008	0.3823	0.005398	0.816	g__Stomatobaculum_LOGres_1:103487999	12916	5.416	6.096e-08	+++
PWY-7204_HB	rs12456836	18:54500895	T	C	0.2984	-0.2196	4.076e-09	intergenic	C18orf54(dist=118860),DYNAP(dist=86864)	0.3029	-0.3596	1.626e-07	0.2966	-0.1252	0.105	PWY-7204_HB_18:54500895	12961	-7.792	6.593e-15	---
s__Haemophilus_parahaemolyticus_HB	rs12455231	18:54395056	A	G	0.2714	-0.208	4.079e-09	intergenic	C18orf54(dist=13021),DYNAP(dist=192703)	0.2773	-0.2668	3.823e-06	0.2722	-0.07722	0.2857	s__Haemophilus_parahaemolyticus_HB_18:54395056	13311	-7.27	3.59e-13	---
s__Haemophilus_parahaemolyticus_HB	rs2177439	18:54420215	G	A	0.2807	-0.205	4.079e-09	intergenic	C18orf54(dist=38180),DYNAP(dist=167544)	0.2891	-0.2691	2.301e-06	0.2826	-0.05804	0.4157	s__Haemophilus_parahaemolyticus_HB_18:54420215	13310	-7.224	5.065e-13	---
s__Haemophilus_parahaemolyticus_HB	rs3744853	18:54407170	A	C	0.28	-0.2054	4.081e-09	intergenic	C18orf54(dist=25135),DYNAP(dist=180589)	0.2867	-0.2593	5.629e-06	0.2809	-0.05773	0.4205	s__Haemophilus_parahaemolyticus_HB_18:54407170	13311	-7.131	9.929e-13	---
s__Haemophilus_parahaemolyticus_HB	rs8083414	18:54403956	C	G	0.2804	-0.205	4.096e-09	intergenic	C18orf54(dist=21921),DYNAP(dist=183803)	0.2867	-0.2595	5.556e-06	0.280838	-0.00130585	0.985965	s__Haemophilus_parahaemolyticus_HB_18:54403956	13120	-6.881	5.936e-12	---
g__Candidatus_Nanosyncoccus_HB	rs3733589	4:9985700	A	G	0.3747	-0.1906	4.099e-09	exonic	SLC2A9	0.3727	-0.08334	0.1224	0.4005	-0.194	0.004088	g__Candidatus_Nanosyncoccus_HB_4:9985700	13311	-6.485	8.881e-11	---
s__Haemophilus_parahaemolyticus_HB	rs4940331	18:54408807	C	T	0.2801	-0.2052	4.1e-09	intergenic	C18orf54(dist=26772),DYNAP(dist=178952)	0.2867	-0.2593	5.629e-06	0.2812	-0.06607	0.3555	s__Haemophilus_parahaemolyticus_HB_18:54408807	13311	-7.176	7.177e-13	---
s__Haemophilus_parahaemolyticus_HB	rs1561234	18:54444819	A	G	0.3403	-0.1938	4.102e-09	intergenic	C18orf54(dist=62784),DYNAP(dist=142940)	0.3421	-0.2831	1.886e-07	0.3395	-0.1107	0.1083	s__Haemophilus_parahaemolyticus_HB_18:54444819	13309	-7.757	8.697e-15	---
s__Haemophilus_parahaemolyticus_HB	rs8090443	18:54416191	A	C	0.2798	-0.2053	4.131e-09	intergenic	C18orf54(dist=34156),DYNAP(dist=171568)	0.2868	-0.2565	6.844e-06	0.2804	-0.05843	0.4149	s__Haemophilus_parahaemolyticus_HB_18:54416191	13311	-7.114	1.129e-12	---
s__Haemophilus_parahaemolyticus_HB	rs55715239	18:54454610	A	G	0.34	-0.1943	4.151e-09	intergenic	C18orf54(dist=72575),DYNAP(dist=133149)	0.3431	-0.2821	2.06e-07	0.341	-0.1134	0.09954	s__Haemophilus_parahaemolyticus_HB_18:54454610	13311	-7.763	8.293e-15	---
s__Haemophilus_parahaemolyticus_HB	rs71368966	18:54373262	C	T	0.2716	-0.2077	4.167e-09	intronic	C18orf54	0.2773	-0.2664	3.875e-06	0.2729	-0.07294	0.3142	s__Haemophilus_parahaemolyticus_HB_18:54373262	13311	-7.243	4.398e-13	---
s__Haemophilus_parahaemolyticus_HB	rs28838401	18:54366605	T	A	0.2815	-0.2031	4.179e-09	intronic	C18orf54	0.2855	-0.2622	4.436e-06	0.2804	-0.07815	0.2766	s__Haemophilus_parahaemolyticus_HB_18:54366605	13308	-7.26	3.873e-13	---
s__Haemophilus_parahaemolyticus_HB	rs12456854	18:54435946	C	T	0.2728	-0.2071	4.214e-09	intergenic	C18orf54(dist=53911),DYNAP(dist=151813)	0.2775	-0.2673	3.539e-06	0.2755	-0.04658	0.5176	s__Haemophilus_parahaemolyticus_HB_18:54435946	13311	-7.113	1.133e-12	---
g__Lachnoanaerobaculum_LOGres	rs3733588	4:9995679	G	A	0.401	-0.065	4.219e-09	intronic	SLC2A9	0.398491	-0.14101	0.0364607	0.4211	-0.09343	3.981e-05	g__Lachnoanaerobaculum_LOGres_4:9995679	13133	-7.212	5.505e-13	---
s__Haemophilus_parahaemolyticus_HB	rs1403883	18:54409280	T	C	0.2801	-0.205	4.292e-09	intergenic	C18orf54(dist=27245),DYNAP(dist=178479)	0.2867	-0.2593	5.629e-06	0.2813	-0.0695	0.332	s__Haemophilus_parahaemolyticus_HB_18:54409280	13310	-7.188	6.585e-13	---
s__Haemophilus_parahaemolyticus_HB	rs8083416	18:54396535	G	A	0.2798	-0.2046	4.319e-09	intergenic	C18orf54(dist=14500),DYNAP(dist=191224)	0.2858	-0.2558	7.57e-06	0.2799	-0.06587	0.3578	s__Haemophilus_parahaemolyticus_HB_18:54396535	13311	-7.137	9.509e-13	---
s__Haemophilus_parahaemolyticus_HB	rs8090211	18:54445893	G	A	0.3412	-0.1939	4.322e-09	intergenic	C18orf54(dist=63858),DYNAP(dist=141866)	0.3421	-0.2831	1.886e-07	0.3402	-0.1232	0.07417	s__Haemophilus_parahaemolyticus_HB_18:54445893	13308	-7.819	5.336e-15	---
g__Lachnoanaerobaculum_LOGres	rs4529048	4:9995488	C	A	0.4017	-0.06495	4.329e-09	intronic	SLC2A9	0.398983	-0.142098	0.0351498	0.4214	-0.09438	3.328e-05	g__Lachnoanaerobaculum_LOGres_4:9995488	13132	-7.232	4.771e-13	---
g__Lachnoanaerobaculum_LOGres	rs6836200	4:9985291	C	T	0.3748	-0.06495	4.335e-09	intronic	SLC2A9	0.372253	-0.111758	0.101733	0.4002	-0.08875	9.581e-05	g__Lachnoanaerobaculum_LOGres_4:9985291	13132	-6.91	4.859e-12	---
s__Haemophilus_parahaemolyticus_HB	rs1523872	18:54421131	C	T	0.2805	-0.2047	4.354e-09	intergenic	C18orf54(dist=39096),DYNAP(dist=166628)	0.2885	-0.261	4.648e-06	0.2806	-0.06535	0.3626	s__Haemophilus_parahaemolyticus_HB_18:54421131	13310	-7.182	6.85e-13	---
s__Haemophilus_parahaemolyticus_HB	rs4502290	18:54421642	T	C	0.2806	-0.2045	4.431e-09	intergenic	C18orf54(dist=39607),DYNAP(dist=166117)	0.2878	-0.2586	5.688e-06	0.2817	-0.07238	0.3106	s__Haemophilus_parahaemolyticus_HB_18:54421642	13310	-7.199	6.062e-13	---
s__Haemophilus_parahaemolyticus_HB	rs12454200	18:54403873	T	A	0.2804	-0.2046	4.441e-09	intergenic	C18orf54(dist=21838),DYNAP(dist=183886)	0.2867	-0.2595	5.556e-06	0.279977	-0.00993519	0.893834	s__Haemophilus_parahaemolyticus_HB_18:54403873	13120	-6.913	4.754e-12	---
s__Haemophilus_parahaemolyticus_HB	rs2083058	18:54403505	T	C	0.2735	-0.2066	4.442e-09	intergenic	C18orf54(dist=21470),DYNAP(dist=184254)	0.2814	-0.2654	4.137e-06	0.274814	-0.00632194	0.932694	s__Haemophilus_parahaemolyticus_HB_18:54403505	13120	-6.925	4.371e-12	---
s__Lachnoanaerobaculum_umeaense_HB	rs57214828	5:26916492	T	C	0.4928	-0.2189	4.467e-09	intronic	CDH9	0.48	0.05699	0.369	0.4995	0.07308	0.2705	s__Lachnoanaerobaculum_umeaense_HB_5:26916492	13308	-3.79	0.0001508	-++
s__GGB1611_SGB2208_HB	rs116869525	6:32421366	T	C	0.06011	-0.4118	4.477e-09	intergenic	LOC101929163(dist=13637),HLA-DRA(dist=18476)	0.06232	-0.477	2.41e-05	0.06057	-0.2307	0.09539	s__GGB1611_SGB2208_HB_6:32421366	13311	-7.296	2.957e-13	---
s__Haemophilus_parahaemolyticus_HB	rs8093718	18:54407682	A	G	0.2802	-0.2045	4.493e-09	intergenic	C18orf54(dist=25647),DYNAP(dist=180077)	0.2867	-0.2593	5.629e-06	0.2816	-0.0634	0.3749	s__Haemophilus_parahaemolyticus_HB_18:54407682	13310	-7.15	8.663e-13	---
s__Haemophilus_parahaemolyticus_HB	rs2118286	18:54407388	C	A	0.2723	-0.207	4.525e-09	intergenic	C18orf54(dist=25353),DYNAP(dist=180371)	0.2776	-0.269	3.117e-06	0.2722	-0.0655	0.3645	s__Haemophilus_parahaemolyticus_HB_18:54407388	13311	-7.215	5.375e-13	---
g__Lachnoanaerobaculum_LOGres	rs73100621	4:9984715	G	C	0.3744	-0.06487	4.526e-09	intronic	SLC2A9	0.372089	-0.111365	0.102884	0.3999	-0.0901	7.474e-05	g__Lachnoanaerobaculum_LOGres_4:9984715	13131	-6.924	4.384e-12	---
s__Haemophilus_parahaemolyticus_HB	rs3744854	18:54407137	G	A	0.2799	-0.2047	4.538e-09	intergenic	C18orf54(dist=25102),DYNAP(dist=180622)	0.2867	-0.2593	5.629e-06	0.27969	-0.00728648	0.922128	s__Haemophilus_parahaemolyticus_HB_18:54407137	13120	-6.896	5.366e-12	---
s__Haemophilus_parahaemolyticus_HB	rs7230833	18:54415150	T	A	0.28	-0.2047	4.586e-09	intergenic	C18orf54(dist=33115),DYNAP(dist=172609)	0.287	-0.2542	8.152e-06	0.2807	-0.05576	0.4371	s__Haemophilus_parahaemolyticus_HB_18:54415150	13311	-7.068	1.576e-12	---
s__Haemophilus_parahaemolyticus_HB	rs765991702	18:54407810	TG	T	0.2802	-0.2043	4.613e-09	intergenic	C18orf54(dist=25775),DYNAP(dist=179949)	0.2867	-0.2593	5.629e-06	0.2812	-0.06074	0.3957	s__Haemophilus_parahaemolyticus_HB_18:54407810	13310	-7.132	9.885e-13	---
s__GGB1611_SGB2208_HB	rs116514685	6:32425991	T	A	0.05982	-0.4121	4.664e-09	intergenic	LOC101929163(dist=18262),HLA-DRA(dist=13851)	0.06215	-0.4726	2.907e-05	0.06005	-0.2456	0.07804	s__GGB1611_SGB2208_HB_6:32425991	13310	-7.307	2.738e-13	---
GLYOXYLATE-BYPASS_HB	rs2802396	13:47093148	T	C	0.4791	-0.1827	4.675e-09	intergenic	HTR2A(dist=196072),LINC00562(dist=837005)	0.4939	-0.03622	0.4929	0.4757	0.03833	0.5645	GLYOXYLATE-BYPASS_HB_13:47093148	12945	-4.742	2.118e-06	--+
s__Lachnoanaerobaculum_umeaense_HB	rs1156358	5:26907764	A	G	0.494	-0.2189	4.686e-09	intronic	CDH9	0.4808	0.05569	0.3802	0.5008	0.07537	0.2562	s__Lachnoanaerobaculum_umeaense_HB_5:26907764	13308	-3.781	0.0001559	-++
g__Stomatobaculum_LOGres	rs10629010	1:103466726	CTAT	C	0.3903	0.06539	4.703e-09	intronic	LOC101928436	0.400623	0.11045	0.226183	0.3843	0.0009136	0.9686	g__Stomatobaculum_LOGres_1:103466726	12921	5.214	1.847e-07	+++
s__Haemophilus_parahaemolyticus_HB	rs3753054	18:54378471	A	G	0.2799	-0.2039	4.706e-09	UTR3	C18orf54(NM_001288980:c.*225G>A,NM_001288981:c.*225G>A,NM_173529:c.*225G>A,NM_001288982:c.*225G>A)	0.2852	-0.2589	5.766e-06	0.2808	-0.07841	0.2735	s__Haemophilus_parahaemolyticus_HB_18:54378471	13310	-7.221	5.165e-13	---
g__Candidatus_Nanosyncoccus_HB	rs3733590	4:9985602	C	T	0.375	-0.1897	4.707e-09	intronic	SLC2A9	0.3727	-0.08359	0.1213	0.4004	-0.1911	0.004775	g__Candidatus_Nanosyncoccus_HB_4:9985602	13309	-6.45	1.119e-10	---
s__Haemophilus_parahaemolyticus_HB	rs12967754	18:54387113	T	C	0.2794	-0.2043	4.715e-09	intergenic	C18orf54(dist=5078),DYNAP(dist=200646)	0.2852	-0.2561	7.348e-06	0.2789	-0.08274	0.2496	s__Haemophilus_parahaemolyticus_HB_18:54387113	13311	-7.217	5.303e-13	---
g__Candidatus_Nanosyncoccus_HB	rs35922993	4:9924301	T	C	0.3824	-0.1881	4.722e-09	intronic	SLC2A9	0.3786	-0.0925	0.08724	0.3994	-0.1565	0.01905	g__Candidatus_Nanosyncoccus_HB_4:9924301	13309	-6.345	2.229e-10	---
g__Candidatus_Nanosyncoccus_HB	rs67968745	4:10007125	A	G	0.373	-0.19	4.766e-09	intronic	SLC2A9	0.3726	-0.09612	0.07415	0.3948	-0.1808	0.007462	g__Candidatus_Nanosyncoccus_HB_4:10007125	13311	-6.506	7.731e-11	---
s__Haemophilus_parahaemolyticus_HB	rs3760542	18:54409632	T	C	0.2807	-0.2041	4.773e-09	intergenic	C18orf54(dist=27597),DYNAP(dist=178127)	0.2867	-0.2593	5.629e-06	0.2817	-0.05795	0.4173	s__Haemophilus_parahaemolyticus_HB_18:54409632	13310	-7.113	1.135e-12	---
s__Haemophilus_parahaemolyticus_HB	rs12955072	18:54397519	G	A	0.2734	-0.206	4.785e-09	intergenic	C18orf54(dist=15484),DYNAP(dist=190240)	0.2801	-0.2635	4.88e-06	0.2737	-0.07089	0.3241	s__Haemophilus_parahaemolyticus_HB_18:54397519	13310	-7.194	6.302e-13	---
g__Lachnoanaerobaculum_LOGres	rs9994216	4:9982917	G	T	0.3968	-0.06479	4.787e-09	intronic	SLC2A9	0.39308	-0.168965	0.0124407	0.4113	-0.09694	2.008e-05	g__Lachnoanaerobaculum_LOGres_4:9982917	13128	-7.452	9.218e-14	---
s__Haemophilus_parahaemolyticus_HB	rs34046175	18:54388001	T	C	0.271	-0.2071	4.788e-09	intergenic	C18orf54(dist=5966),DYNAP(dist=199758)	0.2768	-0.2652	4.325e-06	0.2718	-0.08633	0.233	s__Haemophilus_parahaemolyticus_HB_18:54388001	13310	-7.285	3.224e-13	---
g__GGB1186_HB	rs10520621	15:86313585	G	A	0.07078	0.3761	4.815e-09	ncRNA_intronic	AGBL1-AS1	0.07314	0.1725	0.1341	0.06753	0.1586	0.2856	g__GGB1186_HB_15:86313585	13311	5.754	8.717e-09	+++
PWY-6353_LOGres	rs3796835	4:10009906	C	T	0.4063	-0.06548	4.832e-09	intronic	SLC2A9	0.397233	-0.0441254	0.108716	0.4263	-0.09384	5.919e-05	PWY-6353_LOGres_4:10009906	12765	-6.918	4.575e-12	---
s__Haemophilus_parahaemolyticus_HB	rs28514760	18:54404791	C	T	0.2842	-0.2004	4.874e-09	intergenic	C18orf54(dist=22756),DYNAP(dist=182968)	0.2865	-0.2578	6.338e-06	0.280838	-0.00130986	0.985943	s__Haemophilus_parahaemolyticus_HB_18:54404791	13106	-6.845	7.673e-12	---
g__GGB1186_HB	rs1982942	15:86285822	G	T	0.06906	0.3799	4.881e-09	intronic	AGBL1	0.07133	0.1502	0.1993	0.06546	0.06519	0.6707	g__GGB1186_HB_15:86285822	13311	5.405	6.498e-08	+++
s__Lachnoanaerobaculum_sp_ICM7_HB	rs6834555	4:10060702	G	A	0.4522	-0.1824	4.933e-09	intergenic	SLC2A9(dist=20454),WDR1(dist=13637)	0.4483	-0.2068	9.319e-05	0.4789	-0.2883	1.547e-05	s__Lachnoanaerobaculum_sp_ICM7_HB_4:10060702	13310	-8.144	3.812e-16	---
s__Haemophilus_parahaemolyticus_HB	rs2118287	18:54406064	G	C	0.2746	-0.2056	4.976e-09	intergenic	C18orf54(dist=24029),DYNAP(dist=181695)	0.2807	-0.2657	4.023e-06	0.2764	-0.06008	0.4026	s__Haemophilus_parahaemolyticus_HB_18:54406064	13310	-7.151	8.597e-13	---
g__Lachnoanaerobaculum_LOGres	rs66647240	4:9989034	A	C	0.3734	-0.06469	4.984e-09	intronic	SLC2A9	0.372581	-0.10996	0.107238	0.3979	-0.0861	0.0001536	g__Lachnoanaerobaculum_LOGres_4:9989034	13133	-6.835	8.217e-12	---
s__GGB1611_SGB2208_HB	rs115098399	6:32429010	A	G	0.06033	-0.4102	4.985e-09	intergenic	LOC101929163(dist=21281),HLA-DRA(dist=10832)	0.06232	-0.4828	2.019e-05	0.06108	-0.2251	0.09969	s__GGB1611_SGB2208_HB_6:32429010	13311	-7.293	3.029e-13	---
PWY-6353_LOGres	rs35271694	4:10016214	A	G	0.38	-0.06541	4.986e-09	intronic	SLC2A9	0.372933	-0.062981	0.0235624	0.4039	-0.08112	0.0005208	PWY-6353_LOGres_4:10016214	12766	-7.026	2.132e-12	---
s__Haemophilus_parahaemolyticus_HB	rs9675618	18:54402030	G	A	0.2815	-0.2029	5.009e-09	intergenic	C18orf54(dist=19995),DYNAP(dist=185729)	0.2867	-0.2595	5.556e-06	0.280264	-0.00706188	0.924428	s__Haemophilus_parahaemolyticus_HB_18:54402030	13120	-6.883	5.871e-12	---
g__Candidatus_Nanosyncoccus_HB	rs6849962	4:9985279	A	G	0.3749	-0.1893	5.012e-09	intronic	SLC2A9	0.3723	-0.08518	0.1145	0.4002	-0.1885	0.005401	g__Candidatus_Nanosyncoccus_HB_4:9985279	13310	-6.44	1.191e-10	---
g__Lachnoanaerobaculum_LOGres	rs1014290	4:10000237	G	A	0.3915	-0.06467	5.049e-09	intronic	SLC2A9	0.390948	-0.142402	0.0349813	0.4121	-0.09583	2.502e-05	g__Lachnoanaerobaculum_LOGres_4:10000237	13133	-7.237	4.572e-13	---
g__Candidatus_Nanosyncoccus_HB	rs13117275	4:10006618	C	G	0.3729	-0.1896	5.084e-09	intronic	SLC2A9	0.3721	-0.0983	0.06828	0.3946	-0.188	0.005263	g__Candidatus_Nanosyncoccus_HB_4:10006618	13311	-6.559	5.416e-11	---
GLYOXYLATE-BYPASS_HB	rs2479986	13:47047425	C	T	0.4836	-0.1848	5.094e-09	intergenic	HTR2A(dist=150349),LINC00562(dist=882728)	0.4898	-0.04429	0.4014	0.4746	0.009031	0.8925	GLYOXYLATE-BYPASS_HB_13:47047425	12959	-4.971	6.654e-07	--+
g__Candidatus_Nanosyncoccus_HB	rs3796840	4:10006497	T	C	0.3732	-0.1898	5.099e-09	intronic	SLC2A9	0.3723	-0.09661	0.07298	0.3959	-0.1835	0.006618	g__Candidatus_Nanosyncoccus_HB_4:10006497	13311	-6.516	7.241e-11	---
s__Streptococcus_infantis_LOGres	rs1097970	12:11222338	G	A	0.325	-0.06426	5.099e-09	intergenic	TAS2R42(dist=35401),PRB3(dist=43576)	0.323221	-0.111826	0.0691377	0.3166	-0.02671	0.241	s__Streptococcus_infantis_LOGres_12:11222338	13235	-5.936	2.923e-09	---
s__Haemophilus_parahaemolyticus_HB	rs940311	18:54389079	T	C	0.2714	-0.2067	5.108e-09	intergenic	C18orf54(dist=7044),DYNAP(dist=198680)	0.2768	-0.2652	4.325e-06	0.2722	-0.08736	0.227	s__Haemophilus_parahaemolyticus_HB_18:54389079	13311	-7.282	3.291e-13	---
s__Haemophilus_parahaemolyticus_HB	rs4464149	18:54421553	A	C	0.2804	-0.2038	5.125e-09	intergenic	C18orf54(dist=39518),DYNAP(dist=166206)	0.2876	-0.2574	6.371e-06	0.2812	-0.06693	0.35	s__Haemophilus_parahaemolyticus_HB_18:54421553	13311	-7.138	9.454e-13	---
s__Haemophilus_parahaemolyticus_HB	rs7227253	18:54359974	T	A	0.28	-0.2038	5.183e-09	intronic	C18orf54	0.2855	-0.2619	4.514e-06	0.2813	-0.07944	0.2665	s__Haemophilus_parahaemolyticus_HB_18:54359974	13310	-7.239	4.523e-13	---
s__Solobacterium_SGB6829_HB	rs341051	11:72634860	T	C	0.2572	-0.2116	5.199e-09	intronic	PDE2A	0.2543	-0.06262	0.3015	0.2637	-0.03996	0.5837	s__Solobacterium_SGB6829_HB_11:72634860	13311	-5.323	1.019e-07	---
s__Haemophilus_parahaemolyticus_HB	rs1657911	18:54367743	G	C	0.2748	-0.2053	5.21e-09	intronic	C18orf54	0.2799	-0.2649	4.283e-06	0.2773	-0.06229	0.3866	s__Haemophilus_parahaemolyticus_HB_18:54367743	13309	-7.15	8.668e-13	---
s__Haemophilus_parahaemolyticus_HB	rs896518	18:54579931	A	G	0.2821	-0.2029	5.227e-09	intergenic	C18orf54(dist=197896),DYNAP(dist=7828)	0.2845	-0.2262	8.6e-05	0.2838	-0.04435	0.5369	s__Haemophilus_parahaemolyticus_HB_18:54579931	13309	-6.734	1.646e-11	---
s__Haemophilus_parahaemolyticus_HB	rs11664007	18:54382942	G	A	0.2721	-0.206	5.234e-09	downstream	C18orf54(dist=907)	0.2775	-0.2681	3.385e-06	0.2735	-0.07817	0.2778	s__Haemophilus_parahaemolyticus_HB_18:54382942	13311	-7.256	3.981e-13	---
s__Granulicatella_SGB8239_HB	rs77555637	19:48686406	C	T	0.1467	-0.2573	5.25e-09	intergenic	SEC1P(dist=4161),FUT2(dist=9565)	0.1422	-0.1427	0.06431	0.1409	-0.1289	0.1739	s__Granulicatella_SGB8239_HB_19:48686406	13306	-6.022	1.719e-09	---
s__Haemophilus_parahaemolyticus_HB	rs1851756	18:54386834	T	C	0.2791	-0.204	5.263e-09	intergenic	C18orf54(dist=4799),DYNAP(dist=200925)	0.2852	-0.2561	7.348e-06	0.2794	-0.07307	0.3079	s__Haemophilus_parahaemolyticus_HB_18:54386834	13311	-7.153	8.513e-13	---
s__Haemophilus_parahaemolyticus_HB	rs7240120	18:54367745	A	C	0.2796	-0.2038	5.278e-09	intronic	C18orf54	0.2853	-0.2606	5.044e-06	0.2815	-0.06699	0.3507	s__Haemophilus_parahaemolyticus_HB_18:54367745	13309	-7.158	8.2e-13	---
s__Haemophilus_parahaemolyticus_HB	rs17566331	18:54500231	T	A	0.341	-0.1923	5.284e-09	intergenic	C18orf54(dist=118196),DYNAP(dist=87528)	0.3432	-0.2838	1.779e-07	0.3412	-0.1079	0.1165	s__Haemophilus_parahaemolyticus_HB_18:54500231	13309	-7.715	1.211e-14	---
PWY-6353_LOGres	rs13101688	4:9951387	C	G	0.3752	-0.0653	5.299e-09	intronic	SLC2A9	0.368545	-0.03814	0.17592	0.3958	-0.08088	0.0005413	PWY-6353_LOGres_4:9951387	12766	-6.575	4.87e-11	---
s__Haemophilus_parahaemolyticus_HB	rs8083968	18:54404149	G	C	0.2805	-0.2034	5.313e-09	intergenic	C18orf54(dist=22114),DYNAP(dist=183610)	0.2867	-0.2595	5.556e-06	0.27969	-0.00728648	0.922128	s__Haemophilus_parahaemolyticus_HB_18:54404149	13119	-6.876	6.157e-12	---
g__Lachnoanaerobaculum_LOGres	rs71603977	4:9947762	C	T	0.3765	-0.06457	5.335e-09	intronic	SLC2A9	0.370777	-0.121019	0.0790314	0.392	-0.08971	8.027e-05	g__Lachnoanaerobaculum_LOGres_4:9947762	13132	-6.957	3.488e-12	---
g__Candidatus_Nanosyncoccus_HB	rs68013308	4:9991048	A	C	0.3741	-0.189	5.389e-09	intronic	SLC2A9	0.3726	-0.08821	0.1018	0.3994	-0.1957	0.003832	g__Candidatus_Nanosyncoccus_HB_4:9991048	13310	-6.5	8.011e-11	---
g__Lachnoanaerobaculum_LOGres	rs3775944	4:10018350	G	T	0.4578	-0.06455	5.401e-09	intronic	SLC2A9	0.452935	-0.168576	0.0121284	0.4814	-0.08748	0.00012	g__Lachnoanaerobaculum_LOGres_4:10018350	13133	-7.28	3.337e-13	---
s__Streptococcus_infantis_LOGres	chr12:11208475	12:11208475	AT	A	0.4115	-0.06413	5.442e-09	intergenic	TAS2R42(dist=21538),PRB3(dist=57439)	0.394616	-0.0612744	0.297319	0.4033	-0.06099	0.007325	s__Streptococcus_infantis_LOGres_12:11208475	13237	-6.132	8.68e-10	---
s__Streptococcus_infantis_LOGres	rs1987808	12:11223058	T	C	0.3281	-0.06412	5.475e-09	intergenic	TAS2R42(dist=36121),PRB3(dist=42856)	0.323385	-0.111351	0.0703584	0.3188	-0.03148	0.1665	s__Streptococcus_infantis_LOGres_12:11223058	13241	-6.003	1.937e-09	---
s__Haemophilus_parahaemolyticus_HB	rs34710173	18:54392350	C	T	0.2707	-0.2062	5.484e-09	intergenic	C18orf54(dist=10315),DYNAP(dist=195409)	0.277	-0.2668	3.799e-06	0.2701	-0.06976	0.3359	s__Haemophilus_parahaemolyticus_HB_18:54392350	13311	-7.192	6.397e-13	---
SALVADEHYPOX-PWY_LOGres	rs3796835	4:10009906	C	T	0.4063	-0.06524	5.495e-09	intronic	SLC2A9	0.397233	-0.0451132	0.119484	0.4263	-0.09286	7.063e-05	SALVADEHYPOX-PWY_LOGres_4:10009906	12765	-6.863	6.755e-12	---
s__Lachnoanaerobaculum_sp_ICM7_HB	rs12512525	4:10071411	C	A	0.3765	-0.1872	5.505e-09	intergenic	SLC2A9(dist=31163),WDR1(dist=2928)	0.3678	-0.2186	4.848e-05	0.4008	-0.2516	0.000207	s__Lachnoanaerobaculum_sp_ICM7_HB_4:10071411	13311	-7.971	1.573e-15	---
s__Haemophilus_parahaemolyticus_HB	rs1608517	18:54383399	T	C	0.2788	-0.204	5.529e-09	intergenic	C18orf54(dist=1364),DYNAP(dist=204360)	0.2853	-0.2606	5.052e-06	0.2798	-0.07406	0.3025	s__Haemophilus_parahaemolyticus_HB_18:54383399	13310	-7.189	6.546e-13	---
s__Haemophilus_parahaemolyticus_HB	rs12955977	18:54406441	C	T	0.28	-0.2035	5.541e-09	intergenic	C18orf54(dist=24406),DYNAP(dist=181318)	0.2865	-0.2578	6.338e-06	0.2803	-0.06877	0.3362	s__Haemophilus_parahaemolyticus_HB_18:54406441	13310	-7.139	9.403e-13	---
s__GGB1611_SGB2208_HB	rs115956975	6:32432453	G	T	0.06011	-0.409	5.579e-09	intergenic	LOC101929163(dist=24724),HLA-DRA(dist=7389)	0.06232	-0.492	1.382e-05	0.06057	-0.2446	0.07735	s__GGB1611_SGB2208_HB_6:32432453	13311	-7.364	1.783e-13	---
SALVADEHYPOX-PWY_LOGres	rs35271694	4:10016214	A	G	0.38	-0.0652	5.588e-09	intronic	SLC2A9	0.372933	-0.0647659	0.0270664	0.4039	-0.08005	0.0006172	SALVADEHYPOX-PWY_LOGres_4:10016214	12766	-6.967	3.229e-12	---
s__Haemophilus_parahaemolyticus_HB	rs896517	18:54578221	A	G	0.2821	-0.2022	5.611e-09	intergenic	C18orf54(dist=196186),DYNAP(dist=9538)	0.2845	-0.2226	0.000109	0.2826	-0.04951	0.4904	s__Haemophilus_parahaemolyticus_HB_18:54578221	13310	-6.725	1.757e-11	---
s__Cardiobacterium_hominis_HB	rs10915947	1:223661200	T	G	0.1312	0.2682	5.616e-09	intronic	CAPN8	0.1279	-0.04008	0.6064	0.1258	-0.1434	0.1358	s__Cardiobacterium_hominis_HB_1:223661200	13310	3.794	0.000148	+--
s__Haemophilus_parahaemolyticus_HB	rs8086822	18:54375109	C	T	0.2792	-0.2032	5.617e-09	intronic	C18orf54	0.2852	-0.2589	5.766e-06	0.2804	-0.06893	0.3365	s__Haemophilus_parahaemolyticus_HB_18:54375109	13311	-7.146	8.911e-13	---
s__GGB1611_SGB2208_HB	rs7771308	6:32425482	T	C	0.06007	-0.4088	5.674e-09	intergenic	LOC101929163(dist=17753),HLA-DRA(dist=14360)	0.06232	-0.477	2.41e-05	0.06031	-0.2388	0.08623	s__GGB1611_SGB2208_HB_6:32425482	13311	-7.283	3.254e-13	---
s__GGB1611_SGB2208_HB	rs6929590	6:32424074	G	A	0.05967	-0.4087	5.679e-09	intergenic	LOC101929163(dist=16345),HLA-DRA(dist=15768)	0.06232	-0.477	2.41e-05	0.05982	-0.2407	0.08585	s__GGB1611_SGB2208_HB_6:32424074	13308	-7.284	3.236e-13	---
s__GGB1611_SGB2208_HB	rs144160349	6:32424671	AATTG	A	0.05914	-0.4116	5.699e-09	intergenic	LOC101929163(dist=16942),HLA-DRA(dist=15171)	0.06232	-0.477	2.41e-05	0.05931	-0.2809	0.0463	s__GGB1611_SGB2208_HB_6:32424671	13307	-7.389	1.485e-13	---
s__GGB1611_SGB2208_HB	rs114913214	6:32450544	A	G	0.06011	-0.4084	5.754e-09	intergenic	HLA-DRA(dist=5493),HLA-DRB5(dist=66833)	0.06264	-0.476	2.413e-05	0.06108	-0.2284	0.09876	s__GGB1611_SGB2208_HB_6:32450544	13311	-7.257	3.964e-13	---
g__Lachnoanaerobaculum_LOGres	rs6849962	4:9985279	A	G	0.3749	-0.06442	5.767e-09	intronic	SLC2A9	0.372253	-0.111758	0.101733	0.4002	-0.08875	9.581e-05	g__Lachnoanaerobaculum_LOGres_4:9985279	13132	-6.872	6.322e-12	---
g__Candidatus_Nanosyncoccus_HB	rs73100621	4:9984715	G	C	0.3744	-0.1886	5.775e-09	intronic	SLC2A9	0.3721	-0.08681	0.1077	0.3999	-0.1901	0.004957	g__Candidatus_Nanosyncoccus_HB_4:9984715	13309	-6.447	1.142e-10	---
s__GGB1611_SGB2208_HB	rs16822587	6:32440078	C	T	0.05977	-0.4094	5.777e-09	intronic	HLA-DRA	0.06264	-0.4762	2.401e-05	0.06057	-0.2274	0.0989	s__GGB1611_SGB2208_HB_6:32440078	13311	-7.257	3.972e-13	---
s__Haemophilus_parahaemolyticus_HB	rs12606709	18:54385450	T	C	0.2734	-0.2051	5.792e-09	intergenic	C18orf54(dist=3415),DYNAP(dist=202309)	0.2798	-0.2637	4.785e-06	0.2739	-0.0769	0.2858	s__Haemophilus_parahaemolyticus_HB_18:54385450	13308	-7.202	5.945e-13	---
s__Haemophilus_parahaemolyticus_HB	rs1851754	18:54383245	T	C	0.279	-0.2034	5.804e-09	intergenic	C18orf54(dist=1210),DYNAP(dist=204514)	0.2853	-0.2606	5.052e-06	0.2812	-0.06891	0.3351	s__Haemophilus_parahaemolyticus_HB_18:54383245	13307	-7.157	8.24e-13	---
s__Haemophilus_parahaemolyticus_HB	rs34521851	18:54410135	T	TA	0.282	-0.2018	5.83e-09	intergenic	C18orf54(dist=28100),DYNAP(dist=177624)	0.287	-0.2619	4.49e-06	0.2817	-0.06013	0.3988	s__Haemophilus_parahaemolyticus_HB_18:54410135	13309	-7.122	1.065e-12	---
s__Lachnoanaerobaculum_umeaense_HB	rs74955416	5:26914062	A	G	0.4941	-0.2168	5.836e-09	intronic	CDH9	0.48	0.05699	0.369	0.4997	0.07752	0.2409	s__Lachnoanaerobaculum_umeaense_HB_5:26914062	13297	-3.729	0.0001924	-++
PWY-6353_LOGres	rs34644460	4:10016015	A	G	0.3804	-0.06512	5.845e-09	intronic	SLC2A9	0.372933	-0.062981	0.0235624	0.405	-0.08359	0.0003494	PWY-6353_LOGres_4:10016015	12766	-7.045	1.86e-12	---
s__GGB1611_SGB2208_HB	rs116297629	6:32426138	G	C	0.06007	-0.4088	5.863e-09	intergenic	LOC101929163(dist=18409),HLA-DRA(dist=13704)	0.06215	-0.4726	2.907e-05	0.06031	-0.2388	0.08623	s__GGB1611_SGB2208_HB_6:32426138	13311	-7.259	3.906e-13	---
s__Haemophilus_sputorum_HB	rs433852	19:48613847	T	C	0.4383	0.1899	5.885e-09	upstream	FAM83E(dist=410)	0.4387	0.1091	0.04026	0.4337	0.1617	0.01303	s__Haemophilus_sputorum_HB_19:48613847	13303	6.531	6.516e-11	+++
g__Lachnoanaerobaculum_LOGres	rs11723250	4:10053715	C	T	0.3758	-0.06439	5.888e-09	intergenic	SLC2A9(dist=13467),WDR1(dist=20624)	0.368973	-0.147858	0.0300273	0.4005	-0.09635	2.259e-05	g__Lachnoanaerobaculum_LOGres_4:10053715	13131	-7.256	4.002e-13	---
s__Streptococcus_infantis_LOGres	rs4237931	12:11254029	G	A	0.3511	-0.06397	5.909e-09	intergenic	TAS2R42(dist=67092),PRB3(dist=11885)	0.347491	-0.121518	0.0455531	0.3309	-0.04034	0.0762	s__Streptococcus_infantis_LOGres_12:11254029	13242	-6.233	4.576e-10	---
s__Haemophilus_parahaemolyticus_HB	rs9675607	18:54402138	A	G	0.284	-0.2007	5.914e-09	intergenic	C18orf54(dist=20103),DYNAP(dist=185621)	0.2867	-0.2595	5.556e-06	0.281124	-0.0151167	0.839371	s__Haemophilus_parahaemolyticus_HB_18:54402138	13119	-6.9	5.202e-12	---
s__GGB1611_SGB2208_HB	rs116712006	6:32421894	C	G	0.06029	-0.4071	5.942e-09	intergenic	LOC101929163(dist=14165),HLA-DRA(dist=17948)	0.06199	-0.4793	2.208e-05	0.06186	-0.1787	0.1912	s__GGB1611_SGB2208_HB_6:32421894	13311	-7.131	9.964e-13	---
s__Lachnoanaerobaculum_sp_ICM7_HB	rs6813650	4:10059436	T	G	0.4503	-0.1814	5.975e-09	intergenic	SLC2A9(dist=19188),WDR1(dist=14903)	0.4456	-0.197	0.0001988	0.4773	-0.2892	1.377e-05	s__Lachnoanaerobaculum_sp_ICM7_HB_4:10059436	13310	-8.039	9.034e-16	---
s__Haemophilus_parahaemolyticus_HB	rs4581772	18:54376749	G	T	0.2795	-0.2028	5.992e-09	intronic	C18orf54	0.2852	-0.2589	5.766e-06	0.2802	-0.07076	0.3249	s__Haemophilus_parahaemolyticus_HB_18:54376749	13311	-7.147	8.888e-13	---
s__Capnocytophaga_sp_oral_taxon_863_HB	rs34788005	13:113536340	CA	C	0.3805	0.1914	6.001e-09	intronic	TMCO3	0.4207	0.1156	0.02544	0.3996	0.08978	0.1852	s__Capnocytophaga_sp_oral_taxon_863_HB_13:113536340	13296	6.175	6.605e-10	+++
s__GGB1611_SGB2208_HB	rs114594015	6:32426913	C	T	0.05981	-0.4093	6.006e-09	intergenic	LOC101929163(dist=19184),HLA-DRA(dist=12929)	0.06232	-0.4668	3.535e-05	0.06031	-0.2365	0.08811	s__GGB1611_SGB2208_HB_6:32426913	13311	-7.23	4.818e-13	---
s__Haemophilus_parahaemolyticus_HB	rs11662820	18:54414547	A	G	0.2717	-0.2053	6.006e-09	intergenic	C18orf54(dist=32512),DYNAP(dist=173212)	0.2776	-0.2686	3.184e-06	0.2731	-0.06587	0.361	s__Haemophilus_parahaemolyticus_HB_18:54414547	13310	-7.179	7.034e-13	---
s__Haemophilus_parahaemolyticus_HB	rs3753055	18:54378274	G	A	0.2798	-0.2031	6.03e-09	UTR3	C18orf54(NM_001288980:c.*28A>G,NM_001288981:c.*28A>G,NM_173529:c.*28A>G,NM_001288982:c.*28A>G)	0.2852	-0.2589	5.766e-06	0.2799	-0.0628	0.3809	s__Haemophilus_parahaemolyticus_HB_18:54378274	13311	-7.105	1.206e-12	---
s__Haemophilus_parahaemolyticus_HB	rs3753056	18:54378271	A	G	0.2798	-0.2031	6.03e-09	UTR3	C18orf54(NM_001288980:c.*25G>A,NM_001288981:c.*25G>A,NM_173529:c.*25G>A,NM_001288982:c.*25G>A)	0.2852	-0.2589	5.766e-06	0.2799	-0.0628	0.3809	s__Haemophilus_parahaemolyticus_HB_18:54378271	13311	-7.105	1.206e-12	---
s__Haemophilus_parahaemolyticus_HB	rs12962483	18:54431799	C	T	0.2746	-0.2042	6.055e-09	intergenic	C18orf54(dist=49764),DYNAP(dist=155960)	0.2803	-0.2512	1.269e-05	0.2764	-0.04428	0.5377	s__Haemophilus_parahaemolyticus_HB_18:54431799	13308	-6.924	4.388e-12	---
g__Lachnoanaerobaculum_LOGres	rs7660895	4:9983821	A	G	0.3941	-0.06433	6.056e-09	intronic	SLC2A9	0.392916	-0.167854	0.0128288	0.4106	-0.09395	3.603e-05	g__Lachnoanaerobaculum_LOGres_4:9983821	13133	-7.365	1.775e-13	---
s__Haemophilus_parahaemolyticus_HB	rs4940328	18:54375719	T	A	0.2809	-0.203	6.063e-09	intronic	C18orf54	0.2875	-0.2598	5.299e-06	0.2806	-0.06592	0.3573	s__Haemophilus_parahaemolyticus_HB_18:54375719	13309	-7.129	1.008e-12	---
PWY-6353_LOGres	rs13151113	4:10016554	A	G	0.3796	-0.06504	6.093e-09	intronic	SLC2A9	0.372933	-0.062981	0.0235624	0.4038	-0.08213	0.0004429	PWY-6353_LOGres_4:10016554	12766	-7.015	2.291e-12	---
s__Haemophilus_parahaemolyticus_HB	rs8097147	18:54363142	A	G	0.2797	-0.2025	6.163e-09	intronic	C18orf54	0.2853	-0.2606	5.044e-06	0.2811	-0.06228	0.3852	s__Haemophilus_parahaemolyticus_HB_18:54363142	13310	-7.112	1.14e-12	---
g__Candidatus_Nanosyncoccus_HB	rs16892069	4:10003225	C	T	0.3719	-0.1884	6.169e-09	intronic	SLC2A9	0.3713	-0.09808	0.06865	0.3951	-0.1724	0.01072	g__Candidatus_Nanosyncoccus_HB_4:10003225	13311	-6.441	1.185e-10	---
s__Fusobacterium_nucleatum_LOGres	rs61322704	10:19496461	C	G	0.07701	0.0637	6.178e-09	intronic	MALRD1	0.0796983	-0.138017	0.14217	0.0817	-0.03865	0.08964	s__Fusobacterium_nucleatum_LOGres_10:19496461	13288	3.246	0.001171	+--
s__GGB1611_SGB2208_HB	chr6:32427234	6:32427234	T	TCC	0.06011	-0.4073	6.188e-09	intergenic	LOC101929163(dist=19505),HLA-DRA(dist=12608)	0.06248	-0.4717	2.895e-05	0.06057	-0.2285	0.09846	s__GGB1611_SGB2208_HB_6:32427234	13311	-7.228	4.902e-13	---
s__Haemophilus_parahaemolyticus_HB	rs2156243	18:54382827	A	T	0.2789	-0.2033	6.192e-09	downstream	C18orf54(dist=792)	0.2853	-0.2606	5.052e-06	0.2796	-0.07674	0.2857	s__Haemophilus_parahaemolyticus_HB_18:54382827	13311	-7.187	6.605e-13	---
s__Lachnoanaerobaculum_sp_ICM7_HB	rs714871	4:10058007	G	A	0.4522	-0.1813	6.202e-09	intergenic	SLC2A9(dist=17759),WDR1(dist=16332)	0.448	-0.2014	0.000143	0.4786	-0.2841	2.03e-05	s__Lachnoanaerobaculum_sp_ICM7_HB_4:10058007	13310	-8.041	8.907e-16	---
s__Haemophilus_parahaemolyticus_HB	rs1061830	18:54381697	T	C	0.2715	-0.2055	6.203e-09	UTR3	C18orf54(NM_001288980:c.*3451C>T,NM_001288981:c.*3451C>T,NM_173529:c.*3451C>T,NM_001288982:c.*3451C>T)	0.2773	-0.2664	3.875e-06	0.2718	-0.08379	0.2477	s__Haemophilus_parahaemolyticus_HB_18:54381697	13310	-7.247	4.246e-13	---
s__GGB6813_SGB9727_HB	rs16991851	22:33135420	C	T	0.1966	-0.2297	6.237e-09	intergenic	LINC01640(dist=19126),LARGE1(dist=137441)	0.2043	-0.07682	0.235	0.2047	0.01301	0.8706	s__GGB6813_SGB9727_HB_22:33135420	13310	-5.102	3.356e-07	--+
GLYOXYLATE-BYPASS_HB	rs1431771	13:47070279	T	C	0.4784	-0.1843	6.277e-09	intergenic	HTR2A(dist=173203),LINC00562(dist=859874)	0.4862	-0.04046	0.4432	0.4696	0.03364	0.6144	GLYOXYLATE-BYPASS_HB_13:47070279	12960	-4.77	1.842e-06	--+
s__Haemophilus_parahaemolyticus_HB	rs1866035	18:54406036	G	A	0.2801	-0.2028	6.303e-09	intergenic	C18orf54(dist=24001),DYNAP(dist=181723)	0.2865	-0.2578	6.338e-06	0.2813	-0.07073	0.3228	s__Haemophilus_parahaemolyticus_HB_18:54406036	13310	-7.132	9.875e-13	---
s__Haemophilus_parahaemolyticus_HB	rs1046699	18:54380767	T	G	0.279	-0.2027	6.335e-09	UTR3	C18orf54(NM_001288980:c.*2521G>T,NM_001288981:c.*2521G>T,NM_173529:c.*2521G>T,NM_001288982:c.*2521G>T)	0.2852	-0.2593	5.688e-06	0.2798	-0.06522	0.3644	s__Haemophilus_parahaemolyticus_HB_18:54380767	13310	-7.111	1.149e-12	---
s__Haemophilus_parahaemolyticus_HB	rs8088269	18:54370192	A	G	0.2819	-0.1999	6.351e-09	intronic	C18orf54	0.2855	-0.2621	4.452e-06	0.279564	-0.0197865	0.791293	s__Haemophilus_parahaemolyticus_HB_18:54370192	13107	-6.936	4.047e-12	---
s__Haemophilus_parahaemolyticus_HB	rs62093789	18:54394202	A	C	0.2837	-0.1994	6.379e-09	intergenic	C18orf54(dist=12167),DYNAP(dist=193557)	0.2858	-0.2618	4.585e-06	0.2811	-0.08462	0.2365	s__Haemophilus_parahaemolyticus_HB_18:54394202	13300	-7.238	4.547e-13	---
s__Haemophilus_parahaemolyticus_HB	rs3753053	18:54378832	T	C	0.2802	-0.2022	6.382e-09	UTR3	C18orf54(NM_001288980:c.*586C>T,NM_001288981:c.*586C>T,NM_173529:c.*586C>T,NM_001288982:c.*586C>T)	0.2852	-0.2589	5.766e-06	0.2813	-0.07398	0.3009	s__Haemophilus_parahaemolyticus_HB_18:54378832	13310	-7.158	8.21e-13	---
s__Haemophilus_parahaemolyticus_HB	rs10676068	18:54388622	G	GTAC	0.2791	-0.2028	6.428e-09	intergenic	C18orf54(dist=6587),DYNAP(dist=199137)	0.2853	-0.2544	8.418e-06	0.2802	-0.07753	0.281	s__Haemophilus_parahaemolyticus_HB_18:54388622	13310	-7.135	9.71e-13	---
s__Haemophilus_parahaemolyticus_HB	rs35201369	18:54388620	AT	A	0.2791	-0.2028	6.428e-09	intergenic	C18orf54(dist=6585),DYNAP(dist=199139)	0.285	-0.2578	6.412e-06	0.2802	-0.07753	0.281	s__Haemophilus_parahaemolyticus_HB_18:54388620	13310	-7.162	7.931e-13	---
s__GGB1611_SGB2208_HB	rs6936008	6:32424987	C	G	0.06016	-0.4069	6.49e-09	intergenic	LOC101929163(dist=17258),HLA-DRA(dist=14855)	0.06232	-0.477	2.41e-05	0.0591614	-0.276517	0.0503882	s__GGB1611_SGB2208_HB_6:32424987	13118	-7.373	1.669e-13	---
s__Haemophilus_parahaemolyticus_HB	rs1554583	18:54397891	G	T	0.2791	-0.2026	6.572e-09	intergenic	C18orf54(dist=15856),DYNAP(dist=189868)	0.2857	-0.2575	6.585e-06	0.2796	-0.07802	0.2765	s__Haemophilus_parahaemolyticus_HB_18:54397891	13310	-7.161	8.034e-13	---
s__Haemophilus_parahaemolyticus_HB	rs6508289	18:54362637	C	T	0.2796	-0.2023	6.59e-09	intronic	C18orf54	0.2857	-0.2604	5.128e-06	0.2807	-0.07657	0.2852	s__Haemophilus_parahaemolyticus_HB_18:54362637	13310	-7.178	7.072e-13	---
s__Haemophilus_parahaemolyticus_HB	rs9954028	18:54580188	G	T	0.2836	-0.2011	6.607e-09	intergenic	C18orf54(dist=198153),DYNAP(dist=7571)	0.2855	-0.2243	9.505e-05	0.2856	-0.03742	0.6019	s__Haemophilus_parahaemolyticus_HB_18:54580188	13311	-6.655	2.834e-11	---
SALVADEHYPOX-PWY_LOGres	rs34644460	4:10016015	A	G	0.3804	-0.06488	6.64e-09	intronic	SLC2A9	0.372933	-0.0647659	0.0270664	0.405	-0.08259	0.0004113	SALVADEHYPOX-PWY_LOGres_4:10016015	12766	-6.986	2.835e-12	---
s__Haemophilus_parahaemolyticus_HB	chr18:54382255	18:54382255	AATC	A	0.2793	-0.2025	6.652e-09	downstream	C18orf54(dist=220)	0.2852	-0.2589	5.766e-06	0.2807	-0.07157	0.3179	s__Haemophilus_parahaemolyticus_HB_18:54382255	13311	-7.138	9.447e-13	---
g__Lachnoanaerobaculum_LOGres	rs7679724	4:9983752	G	T	0.3939	-0.06416	6.657e-09	intronic	SLC2A9	0.39308	-0.167576	0.0129956	0.4106	-0.09627	2.292e-05	g__Lachnoanaerobaculum_LOGres_4:9983752	13133	-7.389	1.474e-13	---
s__Haemophilus_parahaemolyticus_HB	rs7243943	18:54435450	T	C	0.2801	-0.2008	6.706e-09	intergenic	C18orf54(dist=53415),DYNAP(dist=152309)	0.2873	-0.2526	9.713e-06	0.2806	-0.0418	0.5601	s__Haemophilus_parahaemolyticus_HB_18:54435450	13308	-6.926	4.343e-12	---
g__GGB1144_LOGres	rs11062894	12:3882626	A	T	0.1349	0.06456	6.709e-09	intergenic	PARP11(dist=9178),CCND2-AS1(dist=366141)	0.254101	0.12962	0.12216	NA	NA	NA	g__GGB1144_LOGres_12:3882626	11099	5.748	9.02e-09	++?
DARABCATK12-PWY_HB	rs76226641	19:48708575	G	C	0.4714	-0.185	6.722e-09	intergenic	FUT2(dist=2641),MAMSTR(dist=4147)	0.479	-0.0964	0.06415	0.4843	-0.1187	0.07767	DARABCATK12-PWY_HB_19:48708575	12951	-6.14	8.255e-10	---
s__Haemophilus_parahaemolyticus_HB	rs4939760	18:54371705	T	A	0.2792	-0.2024	6.73e-09	intronic	C18orf54	0.2855	-0.2621	4.452e-06	0.27899	-0.0144438	0.846997	s__Haemophilus_parahaemolyticus_HB_18:54371705	13119	-6.902	5.134e-12	---
SALVADEHYPOX-PWY_LOGres	rs13151113	4:10016554	A	G	0.3796	-0.06484	6.789e-09	intronic	SLC2A9	0.372933	-0.0647659	0.0270664	0.4038	-0.08109	0.0005238	SALVADEHYPOX-PWY_LOGres_4:10016554	12766	-6.958	3.442e-12	---
s__Haemophilus_parahaemolyticus_HB	rs2067883	18:54436938	A	C	0.281	-0.2018	6.852e-09	intergenic	C18orf54(dist=54903),DYNAP(dist=150821)	0.2875	-0.2565	6.892e-06	0.2827	-0.04689	0.512	s__Haemophilus_parahaemolyticus_HB_18:54436938	13311	-6.986	2.837e-12	---
SALVADEHYPOX-PWY_LOGres	rs13101688	4:9951387	C	G	0.3752	-0.06482	6.866e-09	intronic	SLC2A9	0.368545	-0.0389565	0.189361	0.3958	-0.07996	0.0006262	SALVADEHYPOX-PWY_LOGres_4:9951387	12766	-6.506	7.72e-11	---
GLYOXYLATE-BYPASS_HB	rs1080730	13:47060406	G	A	0.4781	-0.1821	6.914e-09	intergenic	HTR2A(dist=163330),LINC00562(dist=869747)	0.4908	-0.04524	0.3921	0.474	-0.005352	0.9362	GLYOXYLATE-BYPASS_HB_13:47060406	12942	-5.019	5.19e-07	---
s__Haemophilus_parahaemolyticus_HB	rs6508293	18:54386500	C	G	0.2789	-0.2025	6.917e-09	intergenic	C18orf54(dist=4465),DYNAP(dist=201259)	0.285	-0.2578	6.4e-06	0.2803	-0.08461	0.238	s__Haemophilus_parahaemolyticus_HB_18:54386500	13310	-7.192	6.393e-13	---
s__Solobacterium_SGB6829_HB	rs12797791	11:72630333	A	G	0.2526	-0.2091	6.927e-09	intronic	PDE2A	0.254	-0.07033	0.2468	0.2623	-0.03564	0.6263	s__Solobacterium_SGB6829_HB_11:72630333	13303	-5.322	1.027e-07	---
s__GGB1611_SGB2208_HB	rs6936170	6:32425044	A	G	0.06007	-0.4065	6.938e-09	intergenic	LOC101929163(dist=17315),HLA-DRA(dist=14798)	0.06232	-0.477	2.41e-05	0.06057	-0.243	0.08035	s__GGB1611_SGB2208_HB_6:32425044	13311	-7.269	3.611e-13	---
s__Haemophilus_parahaemolyticus_HB	rs1347662	18:54377025	A	T	0.2735	-0.204	6.941e-09	intronic	C18orf54	0.2798	-0.2632	4.905e-06	0.274555	-0.0176845	0.813575	s__Haemophilus_parahaemolyticus_HB_18:54377025	13117	-6.904	5.064e-12	---
s__GGB1611_SGB2208_HB	rs6457580	6:32425364	T	G	0.06011	-0.4061	6.958e-09	intergenic	LOC101929163(dist=17635),HLA-DRA(dist=14478)	0.06232	-0.477	2.41e-05	0.06031	-0.2388	0.08623	s__GGB1611_SGB2208_HB_6:32425364	13311	-7.256	3.975e-13	---
s__Haemophilus_parahaemolyticus_HB	chr18:54419626	18:54419626	CT	C	0.2801	-0.2022	6.965e-09	intergenic	C18orf54(dist=37591),DYNAP(dist=168133)	0.2934	-0.2606	4.366e-06	0.2818	-0.07002	0.3264	s__Haemophilus_parahaemolyticus_HB_18:54419626	13310	-7.154	8.447e-13	---
GLYOXYLATE-BYPASS_HB	rs7331920	13:47069752	A	G	0.4782	-0.1834	6.966e-09	intergenic	HTR2A(dist=172676),LINC00562(dist=860401)	0.4857	-0.03874	0.4626	0.469	0.02942	0.6602	GLYOXYLATE-BYPASS_HB_13:47069752	12961	-4.765	1.893e-06	--+
s__Haemophilus_parahaemolyticus_HB	rs1992130	18:54423953	T	G	0.2827	-0.1998	6.969e-09	intergenic	C18orf54(dist=41918),DYNAP(dist=163806)	0.2888	-0.2578	7.187e-06	0.277618	0.023697	0.750214	s__Haemophilus_parahaemolyticus_HB_18:54423953	13103	-6.663	2.686e-11	--+
s__Haemophilus_parahaemolyticus_HB	rs1403884	18:54432475	G	A	0.2813	-0.2017	6.98e-09	intergenic	C18orf54(dist=50440),DYNAP(dist=155284)	0.2883	-0.2472	1.425e-05	0.282	-0.04812	0.5014	s__Haemophilus_parahaemolyticus_HB_18:54432475	13310	-6.914	4.704e-12	---
s__Haemophilus_parahaemolyticus_HB	rs2156244	18:54382673	C	T	0.2788	-0.2026	6.986e-09	downstream	C18orf54(dist=638)	0.2852	-0.2623	4.38e-06	0.2799	-0.07499	0.2965	s__Haemophilus_parahaemolyticus_HB_18:54382673	13311	-7.177	7.143e-13	---
PWY-7204_HB	rs1992130	18:54423953	T	G	0.2827	-0.22	6.994e-09	intergenic	C18orf54(dist=41918),DYNAP(dist=163806)	0.2888	-0.2832	4.381e-05	NA	NA	NA	PWY-7204_HB_18:54423953	11115	-7.073	1.515e-12	--?
s__GGB1611_SGB2208_HB	rs114404972	6:32425909	A	G	0.06011	-0.4065	6.996e-09	intergenic	LOC101929163(dist=18180),HLA-DRA(dist=13933)	0.06215	-0.4726	2.907e-05	0.06031	-0.2374	0.08645	s__GGB1611_SGB2208_HB_6:32425909	13311	-7.235	4.658e-13	---
s__GGB1611_SGB2208_HB	rs6457579	6:32425316	G	A	0.06011	-0.4065	6.996e-09	intergenic	LOC101929163(dist=17587),HLA-DRA(dist=14526)	0.06232	-0.477	2.41e-05	0.06031	-0.2388	0.08623	s__GGB1611_SGB2208_HB_6:32425316	13311	-7.256	3.996e-13	---
g__Lachnoanaerobaculum_LOGres	rs16868271	4:9987423	G	A	0.374	-0.06406	7.023e-09	intronic	SLC2A9	0.372909	-0.111529	0.102194	0.3997	-0.08947	8.352e-05	g__Lachnoanaerobaculum_LOGres_4:9987423	13133	-6.858	6.986e-12	---
s__GGB1611_SGB2208_HB	rs149225614	6:32428402	AT	A	0.05934	-0.4087	7.057e-09	intergenic	LOC101929163(dist=20673),HLA-DRA(dist=11440)	0.06215	-0.4903	1.559e-05	0.06034	-0.2711	0.04997	s__GGB1611_SGB2208_HB_6:32428402	13310	-7.394	1.421e-13	---
s__Candidatus_Nanosynbacter_SGB96076_HB	rs201835136	6:111044681	TTA	T	0.06373	0.4039	7.099e-09	intergenic	RPF2(dist=16418),GSTM2P1(dist=1738)	0	NA	NA	0.0133411	-0.316703	0.449421	s__Candidatus_Nanosynbacter_SGB96076_HB_6:111044681	9929	4.947	7.54e-07	+?-
s__Haemophilus_parahaemolyticus_HB	rs7240102	18:54584942	G	A	0.2891	-0.1991	7.127e-09	intergenic	C18orf54(dist=202907),DYNAP(dist=2817)	0.2921	-0.2275	6.723e-05	0.2912	-0.08409	0.2371	s__Haemophilus_parahaemolyticus_HB_18:54584942	13311	-6.936	4.022e-12	---
s__Lachnoanaerobaculum_sp_ICM7_HB	rs7664225	4:10058799	G	A	0.4535	-0.18	7.149e-09	intergenic	SLC2A9(dist=18551),WDR1(dist=15540)	0.448	-0.2014	0.000143	0.4796	-0.2857	1.747e-05	s__Lachnoanaerobaculum_sp_ICM7_HB_4:10058799	13306	-8.035	9.365e-16	---
s__Haemophilus_parahaemolyticus_HB	rs143221482	18:54565857	G	GACTTAA	0.293	-0.1984	7.164e-09	intergenic	C18orf54(dist=183822),DYNAP(dist=21902)	0.2955	-0.2246	8.36e-05	0.2941	-0.08173	0.2507	s__Haemophilus_parahaemolyticus_HB_18:54565857	13311	-6.898	5.274e-12	---
s__Haemophilus_parahaemolyticus_HB	rs9304461	18:54365011	G	C	0.2791	-0.2023	7.209e-09	intronic	C18orf54	0.2855	-0.2621	4.463e-06	0.2804	-0.08472	0.2383	s__Haemophilus_parahaemolyticus_HB_18:54365011	13310	-7.222	5.116e-13	---
s__Lachnoanaerobaculum_sp_ICM7_HB	rs714873	4:10057994	G	A	0.4524	-0.1805	7.233e-09	intergenic	SLC2A9(dist=17746),WDR1(dist=16345)	0.448	-0.2014	0.000143	0.4789	-0.2813	2.411e-05	s__Lachnoanaerobaculum_sp_ICM7_HB_4:10057994	13310	-8.006	1.186e-15	---
s__Haemophilus_parahaemolyticus_HB	rs2118290	18:54384096	G	A	0.2792	-0.2022	7.289e-09	intergenic	C18orf54(dist=2061),DYNAP(dist=203663)	0.2853	-0.2606	5.052e-06	0.2789	-0.07951	0.2697	s__Haemophilus_parahaemolyticus_HB_18:54384096	13311	-7.18	6.996e-13	---
g__Candidatus_Nanosyncoccus_HB	rs13127090	4:9995592	A	G	0.376	-0.1873	7.291e-09	intronic	SLC2A9	0.3742	-0.08265	0.1257	0.4025	-0.1863	0.005867	g__Candidatus_Nanosyncoccus_HB_4:9995592	13310	-6.358	2.043e-10	---
s__GGB1611_SGB2208_HB	rs115045614	6:32426838	C	T	0.05977	-0.407	7.315e-09	intergenic	LOC101929163(dist=19109),HLA-DRA(dist=13004)	0.06232	-0.4668	3.535e-05	0.0606	-0.2434	0.07881	s__GGB1611_SGB2208_HB_6:32426838	13310	-7.224	5.041e-13	---
s__GGB1611_SGB2208_HB	rs116706331	6:32426845	C	T	0.05977	-0.407	7.315e-09	intergenic	LOC101929163(dist=19116),HLA-DRA(dist=12997)	0.06232	-0.4668	3.535e-05	0.0606	-0.2434	0.07881	s__GGB1611_SGB2208_HB_6:32426845	13310	-7.224	5.041e-13	---
s__Actinomyces_sp_ICM58_HB	rs958006	15:66634790	T	C	0.314	-0.1936	7.377e-09	ncRNA_intronic	LINC01169	0.3167	0.01777	0.7558	0.3043	-0.08451	0.2334	s__Actinomyces_sp_ICM58_HB_15:66634790	13300	-4.879	1.067e-06	-+-
s__Haemophilus_parahaemolyticus_HB	rs8087515	18:54375421	G	T	0.2795	-0.2015	7.381e-09	intronic	C18orf54	0.2852	-0.2589	5.766e-06	0.2804	-0.08518	0.2357	s__Haemophilus_parahaemolyticus_HB_18:54375421	13311	-7.196	6.209e-13	---
s__Haemophilus_parahaemolyticus_HB	rs4939763	18:54419088	G	A	0.2805	-0.2013	7.412e-09	intergenic	C18orf54(dist=37053),DYNAP(dist=168671)	0.2914	-0.2696	2.126e-06	0.2822	-0.05768	0.4191	s__Haemophilus_parahaemolyticus_HB_18:54419088	13311	-7.15	8.681e-13	---
s__GGB1611_SGB2208_HB	rs148519138	6:32423157	C	T	0.06007	-0.4062	7.424e-09	intergenic	LOC101929163(dist=15428),HLA-DRA(dist=16685)	0.06232	-0.477	2.41e-05	0.0590935	-0.276477	0.0504052	s__GGB1611_SGB2208_HB_6:32423157	13120	-7.355	1.912e-13	---
s__GGB1611_SGB2208_HB	rs7754263	6:32429319	G	A	0.06007	-0.4057	7.46e-09	intergenic	LOC101929163(dist=21590),HLA-DRA(dist=10523)	0.06232	-0.4828	2.019e-05	0.06057	-0.2595	0.0601	s__GGB1611_SGB2208_HB_6:32429319	13311	-7.329	2.322e-13	---
g__Lachnoanaerobaculum_LOGres	rs7669090	4:10026507	C	T	0.4595	-0.06395	7.467e-09	intronic	SLC2A9	0.454903	-0.171385	0.0108128	0.4856	-0.08902	9.077e-05	g__Lachnoanaerobaculum_LOGres_4:10026507	13132	-7.283	3.271e-13	---
s__Haemophilus_parahaemolyticus_HB	rs8097231	18:54371683	A	C	0.2789	-0.2021	7.472e-09	intronic	C18orf54	0.2855	-0.2621	4.452e-06	0.2799	-0.06867	0.3395	s__Haemophilus_parahaemolyticus_HB_18:54371683	13311	-7.132	9.875e-13	---
s__GGB1611_SGB2208_HB	rs146771984	6:32422365	A	T	0.06003	-0.4048	7.489e-09	intergenic	LOC101929163(dist=14636),HLA-DRA(dist=17477)	0.06232	-0.477	2.41e-05	0.0590935	-0.276477	0.0504052	s__GGB1611_SGB2208_HB_6:32422365	13120	-7.354	1.929e-13	---
s__Lachnoanaerobaculum_sp_ICM7_HB	rs6812851	4:10057079	G	C	0.4521	-0.1805	7.511e-09	intergenic	SLC2A9(dist=16831),WDR1(dist=17260)	0.4482	-0.2028	0.000128	0.4791	-0.2925	1.144e-05	s__Lachnoanaerobaculum_sp_ICM7_HB_4:10057079	13308	-8.077	6.656e-16	---
g__Lachnoanaerobaculum_LOGres	rs3733589	4:9985700	A	G	0.3747	-0.06393	7.537e-09	exonic	SLC2A9	0.372745	-0.111187	0.103431	0.4005	-0.09123	6.027e-05	g__Lachnoanaerobaculum_LOGres_4:9985700	13133	-6.876	6.176e-12	---
s__GGB1611_SGB2208_HB	rs143157827	6:32426553	TG	T	0.05977	-0.4064	7.562e-09	intergenic	LOC101929163(dist=18824),HLA-DRA(dist=13289)	0.06215	-0.4814	2.032e-05	0.05982	-0.2241	0.1081	s__GGB1611_SGB2208_HB_6:32426553	13310	-7.222	5.112e-13	---
s__Haemophilus_parahaemolyticus_HB	rs1851755	18:54383124	T	A	0.2794	-0.2016	7.577e-09	intergenic	C18orf54(dist=1089),DYNAP(dist=204635)	0.2853	-0.2606	5.052e-06	0.2804	-0.07785	0.2764	s__Haemophilus_parahaemolyticus_HB_18:54383124	13309	-7.169	7.563e-13	---
g__Candidatus_Nanosyncoccus_HB	rs11943372	4:9997722	T	A	0.4088	-0.1819	7.661e-09	intronic	SLC2A9	0.3987	-0.1146	0.03148	0.4232	-0.2164	0.001139	g__Candidatus_Nanosyncoccus_HB_4:9997722	13288	-6.838	8.046e-12	---
s__GGB1611_SGB2208_HB	rs116610730	6:32426593	G	A	0.05964	-0.4058	7.711e-09	intergenic	LOC101929163(dist=18864),HLA-DRA(dist=13249)	0.06166	-0.4692	3.493e-05	0.05979	-0.2545	0.06747	s__GGB1611_SGB2208_HB_6:32426593	13311	-7.245	4.312e-13	---
s__Streptococcus_infantis_LOGres	rs782430220	12:11256946	GGCAGCTCTGAAGAGA	G	0.3498	-0.06348	7.712e-09	intergenic	TAS2R42(dist=70009),PRB3(dist=8968)	0.347163	-0.121871	0.0453344	0.3428	-0.0565505	0.258131	s__Streptococcus_infantis_LOGres_12:11256946	13052	-5.974	2.308e-09	---
s__Haemophilus_parahaemolyticus_HB	rs12604755	18:54419245	G	A	0.2748	-0.2031	7.814e-09	intergenic	C18orf54(dist=37210),DYNAP(dist=168514)	0.2788	-0.2555	9.56e-06	0.276	-0.06591	0.3594	s__Haemophilus_parahaemolyticus_HB_18:54419245	13311	-7.034	2.008e-12	---
s__GGB1611_SGB2208_HB	rs16822602	6:32441920	A	C	0.06007	-0.4054	7.815e-09	intronic	HLA-DRA	0.06264	-0.4762	2.401e-05	0.06005	-0.2452	0.07729	s__GGB1611_SGB2208_HB_6:32441920	13311	-7.261	3.848e-13	---
s__Haemophilus_parahaemolyticus_HB	rs4940325	18:54371962	T	G	0.2792	-0.2018	7.822e-09	intronic	C18orf54	0.2855	-0.2621	4.452e-06	0.2804	-0.06915	0.3367	s__Haemophilus_parahaemolyticus_HB_18:54371962	13310	-7.128	1.016e-12	---
s__Haemophilus_parahaemolyticus_HB	rs4940326	18:54371963	C	T	0.2792	-0.2018	7.822e-09	intronic	C18orf54	0.2855	-0.2621	4.452e-06	0.2804	-0.06915	0.3367	s__Haemophilus_parahaemolyticus_HB_18:54371963	13310	-7.128	1.016e-12	---
s__Haemophilus_parahaemolyticus_HB	rs12457473	18:54389403	T	C	0.2792	-0.2015	7.857e-09	intergenic	C18orf54(dist=7368),DYNAP(dist=198356)	0.2853	-0.2544	8.418e-06	0.2795	-0.0755	0.2937	s__Haemophilus_parahaemolyticus_HB_18:54389403	13310	-7.097	1.272e-12	---
s__Haemophilus_parahaemolyticus_HB	rs9959563	18:54369892	C	T	0.2798	-0.2009	7.864e-09	intronic	C18orf54	0.2855	-0.2621	4.452e-06	0.2807	-0.07675	0.284	s__Haemophilus_parahaemolyticus_HB_18:54369892	13310	-7.17	7.515e-13	---
GLYOXYLATE-BYPASS_HB	rs2436011	13:47054847	T	A	0.4812	-0.1831	7.873e-09	intergenic	HTR2A(dist=157771),LINC00562(dist=875306)	0.4877	-0.03593	0.4962	0.4724	0.02434	0.7156	GLYOXYLATE-BYPASS_HB_13:47054847	12961	-4.75	2.03e-06	--+
s__Haemophilus_parahaemolyticus_HB	rs1787835	18:54363858	G	A	0.2786	-0.1974	7.906e-09	intronic	C18orf54	0.2775	-0.2681	3.38e-06	0.2755	-0.0922	0.1995	s__Haemophilus_parahaemolyticus_HB_18:54363858	13296	-7.277	3.405e-13	---
s__GGB1611_SGB2208_HB	rs114001299	6:32426734	A	C	0.06003	-0.4045	7.941e-09	intergenic	LOC101929163(dist=19005),HLA-DRA(dist=13108)	0.06215	-0.4636	4.04e-05	0.06014	-0.2374	0.08713	s__GGB1611_SGB2208_HB_6:32426734	13308	-7.181	6.928e-13	---
s__GGB1611_SGB2208_HB	rs6915350	6:32424943	C	T	0.06011	-0.4051	7.948e-09	intergenic	LOC101929163(dist=17214),HLA-DRA(dist=14899)	0.06232	-0.477	2.41e-05	0.05979	-0.2393	0.08676	s__GGB1611_SGB2208_HB_6:32424943	13311	-7.238	4.566e-13	---
s__Haemophilus_parahaemolyticus_HB	rs9953290	18:54425848	A	G	0.2808	-0.201	7.95e-09	intergenic	C18orf54(dist=43813),DYNAP(dist=161911)	0.2871	-0.2502	1.146e-05	0.2817	-0.05118	0.4757	s__Haemophilus_parahaemolyticus_HB_18:54425848	13311	-6.935	4.052e-12	---
s__Solobacterium_SGB6829_HB	rs56133505	11:72636995	A	G	0.2497	-0.2089	7.963e-09	intronic	PDE2A	0.254	-0.06596	0.2765	0.2617	-0.04083	0.5769	s__Solobacterium_SGB6829_HB_11:72636995	13304	-5.297	1.18e-07	---
s__GGB1611_SGB2208_HB	rs7753500	6:32425577	G	T	0.06016	-0.405	7.966e-09	intergenic	LOC101929163(dist=17848),HLA-DRA(dist=14265)	0.06232	-0.477	2.41e-05	0.06086	-0.2366	0.08537	s__GGB1611_SGB2208_HB_6:32425577	13310	-7.24	4.477e-13	---
s__GGB1844_SGB2532_HB	rs8038825	15:100747129	C	T	0.2236	-0.265	7.981e-09	intergenic	ASB7(dist=95430),ALDH1A3(dist=132563)	0.2187	0.1111	0.1484	0.222	0.03124	0.6931	s__GGB1844_SGB2532_HB_15:100747129	13309	-3.721	0.0001981	-++
s__GGB1611_SGB2208_HB	rs115353337	6:32427050	A	G	0.05982	-0.4053	7.989e-09	intergenic	LOC101929163(dist=19321),HLA-DRA(dist=12792)	0.06248	-0.4717	2.895e-05	0.06134	-0.2288	0.09227	s__GGB1611_SGB2208_HB_6:32427050	13309	-7.206	5.765e-13	---
s__GGB1611_SGB2208_HB	rs115472206	6:32424656	T	G	0.05958	-0.4064	7.999e-09	intergenic	LOC101929163(dist=16927),HLA-DRA(dist=15186)	0.06232	-0.477	2.41e-05	0.05934	-0.2768	0.04874	s__GGB1611_SGB2208_HB_6:32424656	13305	-7.335	2.212e-13	---
g__Lachnoanaerobaculum_LOGres	rs3796840	4:10006497	T	C	0.3732	-0.06379	8.102e-09	intronic	SLC2A9	0.372253	-0.128214	0.0599017	0.3959	-0.08251	0.000287	g__Lachnoanaerobaculum_LOGres_4:10006497	13133	-6.84	7.899e-12	---
s__GGB1611_SGB2208_HB	rs114913290	6:32422899	T	C	0.0599	-0.4047	8.109e-09	intergenic	LOC101929163(dist=15170),HLA-DRA(dist=16943)	0.06232	-0.477	2.41e-05	0.0590935	-0.276477	0.0504052	s__GGB1611_SGB2208_HB_6:32422899	13120	-7.343	2.089e-13	---
g__Candidatus_Nanosyncoccus_HB	rs11723250	4:10053715	C	T	0.3758	-0.1852	8.135e-09	intergenic	SLC2A9(dist=13467),WDR1(dist=20624)	0.369	-0.1351	0.01231	0.4005	-0.1767	0.008154	g__Candidatus_Nanosyncoccus_HB_4:10053715	13309	-6.767	1.316e-11	---
s__GGB1611_SGB2208_HB	rs114188689	6:32423812	A	G	0.05986	-0.4051	8.135e-09	intergenic	LOC101929163(dist=16083),HLA-DRA(dist=16030)	0.06232	-0.477	2.41e-05	0.06057	-0.2498	0.07239	s__GGB1611_SGB2208_HB_6:32423812	13311	-7.267	3.689e-13	---
g__Isoptericola_HB	rs79913076	7:151716594	A	C	0.09804	0.3386	8.172e-09	intronic	PRKAG2	0.09643	0.02374	0.8295	0.11331	0.108962	0.504274	g__Isoptericola_HB_7:151716594	13120	4.94	7.805e-07	+++
g__Stomatobaculum_LOGres	rs4562665	1:103446465	G	A	0.4329	0.06436	8.211e-09	intronic	LOC101928436	0.429813	0.155089	0.0848224	0.4193	-0.008297	0.7204	g__Stomatobaculum_LOGres_1:103446465	12920	5.239	1.612e-07	++-
s__Haemophilus_parahaemolyticus_HB	rs200214802	18:54406748	T	G	0.2798	-0.2013	8.253e-09	intergenic	C18orf54(dist=24713),DYNAP(dist=181011)	0.2867	-0.2593	5.629e-06	0.282	-0.04356	0.5425	s__Haemophilus_parahaemolyticus_HB_18:54406748	13301	-6.963	3.322e-12	---
g__Lachnoanaerobaculum_LOGres	rs73100632	4:9987730	C	G	0.3721	-0.06376	8.305e-09	intronic	SLC2A9	0.372909	-0.111035	0.103722	0.3986	-0.08718	0.0001273	g__Lachnoanaerobaculum_LOGres_4:9987730	13129	-6.793	1.1e-11	---
s__GGB1611_SGB2208_HB	rs16822610	6:32442067	A	G	0.06011	-0.4039	8.321e-09	intronic	HLA-DRA	0.06264	-0.4762	2.401e-05	0.06057	-0.2446	0.07735	s__GGB1611_SGB2208_HB_6:32442067	13311	-7.252	4.097e-13	---
s__Haemophilus_sputorum_HB	rs77555637	19:48686406	C	T	0.1467	-0.2635	8.368e-09	intergenic	SEC1P(dist=4161),FUT2(dist=9565)	0.1422	-0.1401	0.07056	0.1409	-0.1583	0.08904	s__Haemophilus_sputorum_HB_19:48686406	13306	-6.07	1.276e-09	---
s__Campylobacter_SGB19347_HB	rs11665477	18:37430432	C	T	0.1402	0.2633	8.378e-09	intronic	CELF4	0.1287	-0.143	0.07624	0.146	0.144	0.1158	s__Campylobacter_SGB19347_HB_18:37430432	13303	4.309	1.638e-05	+-+
s__Streptococcus_infantis_LOGres	rs1451768	12:11224996	A	G	0.3294	-0.06333	8.38e-09	intergenic	TAS2R42(dist=38059),PRB3(dist=40918)	0.323877	-0.110628	0.0718721	0.3175	-0.03165	0.1642	s__Streptococcus_infantis_LOGres_12:11224996	13242	-5.945	2.767e-09	---
g__Isoptericola_HB	rs10952317	7:151718468	T	C	0.09541	0.3406	8.409e-09	intronic	PRKAG2	0.09462	0.06201	0.5721	0.111589	0.101636	0.535972	g__Isoptericola_HB_7:151718468	13119	5.087	3.638e-07	+++
SALVADEHYPOX-PWY_LOGres	rs35482941	4:10043720	TG	T	0.3769	-0.06444	8.414e-09	intergenic	SLC2A9(dist=3472),WDR1(dist=30619)	0.371077	-0.0481209	0.099916	0.4035	-0.07965	0.0006626	SALVADEHYPOX-PWY_LOGres_4:10043720	12762	-6.633	3.286e-11	---
s__GGB1611_SGB2208_HB	rs16822567	6:32439483	A	C	0.06016	-0.404	8.418e-09	upstream	HLA-DRA(dist=359)	0.06264	-0.4762	2.401e-05	0.06031	-0.2534	0.06784	s__GGB1611_SGB2208_HB_6:32439483	13311	-7.274	3.502e-13	---
s__GGB1611_SGB2208_HB	rs115487398	6:32422429	C	T	0.05995	-0.4043	8.425e-09	intergenic	LOC101929163(dist=14700),HLA-DRA(dist=17413)	0.06232	-0.477	2.41e-05	0.06008	-0.2288	0.1006	s__GGB1611_SGB2208_HB_6:32422429	13309	-7.203	5.892e-13	---
s__GGB1611_SGB2208_HB	rs144608450	6:32423147	T	C	0.06003	-0.4047	8.426e-09	intergenic	LOC101929163(dist=15418),HLA-DRA(dist=16695)	0.06232	-0.477	2.41e-05	0.0590935	-0.276477	0.0504052	s__GGB1611_SGB2208_HB_6:32423147	13120	-7.338	2.171e-13	---
s__GGB1611_SGB2208_HB	rs6929953	6:32424211	T	C	0.06007	-0.4044	8.429e-09	intergenic	LOC101929163(dist=16482),HLA-DRA(dist=15631)	0.06248	-0.4807	2.065e-05	0.06057	-0.2456	0.07615	s__GGB1611_SGB2208_HB_6:32424211	13311	-7.27	3.608e-13	---
s__Haemophilus_parahaemolyticus_HB	rs4572501	18:54574161	A	C	0.2986	-0.1963	8.435e-09	intergenic	C18orf54(dist=192126),DYNAP(dist=13598)	0.2994	-0.2091	0.0002306	0.295754	-0.0620009	0.403501	s__Haemophilus_parahaemolyticus_HB_18:54574161	13114	-6.668	2.585e-11	---
g__Lachnoanaerobaculum_LOGres	chr4:10020039	4:10020039	A	AGTGTGT	0.93085	-0.06372	8.436e-09	intronic	SLC2A9	NA	NA	NA	NA	NA	NA	g__Lachnoanaerobaculum_LOGres_4:10020039	8155	-5.76	8.436e-09	-??
s__Solobacterium_SGB6829_HB	rs3781916	11:72657942	G	T	0.2571	-0.2074	8.451e-09	intronic	PDE2A	0.258	-0.06902	0.2514	0.2639	-0.06013	0.4125	s__Solobacterium_SGB6829_HB_11:72657942	13311	-5.417	6.07e-08	---
g__Lachnoanaerobaculum_LOGres	rs36058283	4:10006888	A	C	0.3724	-0.06371	8.476e-09	intronic	SLC2A9	0.372581	-0.126033	0.064293	0.3956	-0.08173	0.0003278	g__Lachnoanaerobaculum_LOGres_4:10006888	13132	-6.806	1.003e-11	---
s__Lachnoanaerobaculum_sp_ICM7_HB	rs6820756	4:10061225	A	G	0.452	-0.1797	8.495e-09	intergenic	SLC2A9(dist=20977),WDR1(dist=13114)	0.4482	-0.2079	8.506e-05	0.4791	-0.2787	2.79e-05	s__Lachnoanaerobaculum_sp_ICM7_HB_4:10061225	13310	-8.033	9.543e-16	---
s__GGB1611_SGB2208_HB	rs114656303	6:32427467	G	C	0.06003	-0.4042	8.532e-09	intergenic	LOC101929163(dist=19738),HLA-DRA(dist=12375)	0.06248	-0.4717	2.895e-05	0.06082	-0.2358	0.0867	s__GGB1611_SGB2208_HB_6:32427467	13311	-7.208	5.661e-13	---
s__GGB1611_SGB2208_HB	rs116103816	6:32427459	A	C	0.06003	-0.4042	8.532e-09	intergenic	LOC101929163(dist=19730),HLA-DRA(dist=12383)	0.06248	-0.4717	2.895e-05	0.06082	-0.2358	0.0867	s__GGB1611_SGB2208_HB_6:32427459	13311	-7.208	5.661e-13	---
g__Isoptericola_HB	rs76770821	7:151715943	A	G	0.09727	0.3394	8.538e-09	intronic	PRKAG2	0.09462	0.02761	0.8034	0.11245	0.0651977	0.695522	g__Isoptericola_HB_7:151715943	13120	4.85	1.236e-06	+++
GLYOXYLATE-BYPASS_HB	rs1431770	13:47082196	G	A	0.4828	-0.1827	8.577e-09	intergenic	HTR2A(dist=185120),LINC00562(dist=847957)	0.4902	-0.04218	0.4256	0.474	0.03055	0.648	GLYOXYLATE-BYPASS_HB_13:47082196	12961	-4.761	1.93e-06	--+
s__Fusobacterium_nucleatum_LOGres	rs76311122	10:19492354	T	C	0.07559	0.0631	8.578e-09	intronic	MALRD1	0.0765825	-0.125366	0.189095	0.07835	-0.05424	0.01717	s__Fusobacterium_nucleatum_LOGres_10:19492354	13288	3.015	0.002571	+--
s__Lachnoanaerobaculum_umeaense_HB	rs79547551	5:26918939	C	A	0.4929	-0.2152	8.592e-09	intronic	CDH9	0.4811	0.05892	0.3526	0.5005	0.0624	0.3462	s__Lachnoanaerobaculum_umeaense_HB_5:26918939	13310	-3.749	0.0001772	-++
s__GGB1611_SGB2208_HB	rs115617611	6:32423524	G	A	0.06094	-0.3985	8.637e-09	intergenic	LOC101929163(dist=15795),HLA-DRA(dist=16318)	0.06232	-0.477	2.41e-05	0.06011	-0.2519	0.07086	s__GGB1611_SGB2208_HB_6:32423524	13186	-7.262	3.806e-13	---
g__Candidatus_Nanosyncoccus_HB	rs34707376	4:9977277	A	G	0.3744	-0.1858	8.638e-09	intronic	SLC2A9	0.3731	-0.0723	0.1813	0.395725	-0.164217	0.019559	g__Candidatus_Nanosyncoccus_HB_4:9977277	13108	-6.081	1.196e-09	---
s__GGB1611_SGB2208_HB	rs6930108	6:32424277	T	C	0.06011	-0.403	8.777e-09	intergenic	LOC101929163(dist=16548),HLA-DRA(dist=15565)	0.06232	-0.477	2.41e-05	0.06005	-0.2305	0.09798	s__GGB1611_SGB2208_HB_6:32424277	13311	-7.202	5.922e-13	---
s__Fusobacterium_nucleatum_LOGres	rs12262594	10:19523656	A	G	0.0774	0.06306	8.788e-09	intronic	MALRD1	0.0796983	-0.120254	0.200965	0.08222	-0.03961	0.0819	s__Fusobacterium_nucleatum_LOGres_10:19523656	13288	3.273	0.001063	+--
s__GGB1611_SGB2208_HB	rs7754635	6:32429251	A	G	0.06016	-0.4034	8.845e-09	intergenic	LOC101929163(dist=21522),HLA-DRA(dist=10591)	0.06232	-0.4828	2.019e-05	0.06031	-0.2513	0.0699	s__GGB1611_SGB2208_HB_6:32429251	13311	-7.28	3.328e-13	---
s__GGB1611_SGB2208_HB	rs7754753	6:32429624	T	A	0.0602	-0.4034	8.845e-09	intergenic	LOC101929163(dist=21895),HLA-DRA(dist=10218)	0.06232	-0.4828	2.019e-05	0.06057	-0.2427	0.07831	s__GGB1611_SGB2208_HB_6:32429624	13311	-7.261	3.854e-13	---
s__Haemophilus_parahaemolyticus_HB	rs7230556	18:54364493	T	C	0.2796	-0.2005	8.846e-09	intronic	C18orf54	0.2855	-0.2621	4.463e-06	0.2797	-0.07634	0.2885	s__Haemophilus_parahaemolyticus_HB_18:54364493	13307	-7.15	8.659e-13	---
s__Fusobacterium_nucleatum_LOGres	rs10494864	10:19522969	A	C	0.0777	0.06304	8.847e-09	intronic	MALRD1	0.0793703	-0.12249	0.194423	0.08196	-0.03984	0.08013	s__Fusobacterium_nucleatum_LOGres_10:19522969	13288	3.26	0.001116	+--
g__Lachnoanaerobaculum_LOGres	rs13117275	4:10006618	C	G	0.3729	-0.06362	8.915e-09	intronic	SLC2A9	0.372089	-0.129217	0.0580591	0.3946	-0.07957	0.00047	g__Lachnoanaerobaculum_LOGres_4:10006618	13133	-6.785	1.164e-11	---
g__Lachnoanaerobaculum_LOGres	rs13141527	4:9997595	A	G	0.3733	-0.0636	9.013e-09	intronic	SLC2A9	0.373893	-0.119068	0.0809049	0.3997	-0.08899	9.125e-05	g__Lachnoanaerobaculum_LOGres_4:9997595	13131	-6.87	6.413e-12	---
g__Candidatus_Nanosyncoccus_HB	rs6836961	4:10063200	A	C	0.3752	-0.1851	9.04e-09	intergenic	SLC2A9(dist=22952),WDR1(dist=11139)	0.367	-0.1362	0.01183	0.3997	-0.1753	0.00916	g__Candidatus_Nanosyncoccus_HB_4:10063200	13310	-6.744	1.536e-11	---
s__Haemophilus_parahaemolyticus_HB	rs1344883	18:54382033	C	T	0.2798	-0.2006	9.063e-09	UTR3	C18orf54(NM_001288980:c.*3787T>C,NM_001288981:c.*3787T>C,NM_173529:c.*3787T>C,NM_001288982:c.*3787T>C)	0.2852	-0.2589	5.766e-06	0.2808	-0.065	0.3661	s__Haemophilus_parahaemolyticus_HB_18:54382033	13306	-7.061	1.648e-12	---
s__Haemophilus_parahaemolyticus_HB	rs1344884	18:54382036	G	A	0.2798	-0.2006	9.063e-09	downstream	C18orf54(dist=1)	0.2852	-0.2589	5.766e-06	0.2806	-0.06226	0.3866	s__Haemophilus_parahaemolyticus_HB_18:54382036	13306	-7.047	1.829e-12	---
PWY-6353_LOGres	rs35482941	4:10043720	TG	T	0.3769	-0.06429	9.101e-09	intergenic	SLC2A9(dist=3472),WDR1(dist=30619)	0.371077	-0.0465044	0.0939928	0.4035	-0.08068	0.0005625	PWY-6353_LOGres_4:10043720	12762	-6.654	2.859e-11	---
GLYOXYLATE-BYPASS_HB	rs2116388	13:47058982	C	T	0.4841	-0.1815	9.192e-09	intergenic	HTR2A(dist=161906),LINC00562(dist=871171)	0.4913	-0.04448	0.4003	0.4763	0.009533	0.8867	GLYOXYLATE-BYPASS_HB_13:47058982	12961	-4.891	1.003e-06	--+
s__Streptococcus_infantis_LOGres	rs1451769	12:11225261	T	G	0.33	-0.06315	9.241e-09	intergenic	TAS2R42(dist=38324),PRB3(dist=40653)	0.323877	-0.110628	0.0718721	0.3188	-0.03222	0.1567	s__Streptococcus_infantis_LOGres_12:11225261	13242	-5.941	2.825e-09	---
s__Actinomyces_bouchesdurhonensis_HB	rs4815963	20:7027236	C	T	0.4447	0.1934	9.268e-09	intergenic	BMP2(dist=246958),LINC01428(dist=119231)	0.4365	0.06037	0.2968	0.4551	0.05762	0.3915	s__Actinomyces_bouchesdurhonensis_HB_20:7027236	13309	5.369	7.905e-08	+++
s__GGB12441_SGB19290_HB	rs111522290	6:43728831	GT	G	0.05857	0.3953	9.311e-09	intergenic	MRPS18A(dist=41019),VEGFA(dist=41378)	0.06297	0.2371	0.02957	0.0549	0.3747	0.0104	s__GGB12441_SGB19290_HB_6:43728831	13311	6.56	5.364e-11	+++
g__Lachnoanaerobaculum_LOGres	rs67968745	4:10007125	A	G	0.373	-0.06353	9.323e-09	intronic	SLC2A9	0.372581	-0.126158	0.0638452	0.3948	-0.08124	0.0003559	g__Lachnoanaerobaculum_LOGres_4:10007125	13133	-6.787	1.148e-11	---
s__Streptococcus_infantis_LOGres	rs6488362	12:11217081	A	G	0.3289	-0.06313	9.363e-09	intergenic	TAS2R42(dist=30144),PRB3(dist=48833)	0.323221	-0.112553	0.0673494	0.3188	-0.0315	0.1662	s__Streptococcus_infantis_LOGres_12:11217081	13241	-5.942	2.822e-09	---
s__Haemophilus_parahaemolyticus_HB	rs4940324	18:54368799	C	G	0.28	-0.1997	9.377e-09	intronic	C18orf54	0.2853	-0.2606	5.044e-06	0.2812	-0.07089	0.3208	s__Haemophilus_parahaemolyticus_HB_18:54368799	13306	-7.104	1.211e-12	---
g__Stomatobaculum_LOGres	rs6666146	1:103447137	T	C	0.4334	0.0641	9.397e-09	intronic	LOC101928436	0.429649	0.153044	0.0893539	0.4183	-0.007079	0.76	g__Stomatobaculum_LOGres_1:103447137	12921	5.229	1.704e-07	++-
s__GGB1611_SGB2208_HB	chr6:32422981	6:32422981	T	TGA	0.05986	-0.4035	9.398e-09	intergenic	LOC101929163(dist=15252),HLA-DRA(dist=16861)	0.06232	-0.477	2.41e-05	0.0596	-0.2506	0.07428	s__GGB1611_SGB2208_HB_6:32422981	13309	-7.243	4.391e-13	---
g__Lachnoanaerobaculum_LOGres	rs68013308	4:9991048	A	C	0.3741	-0.0635	9.497e-09	intronic	SLC2A9	0.372581	-0.111669	0.101648	0.3994	-0.08813	0.0001072	g__Lachnoanaerobaculum_LOGres_4:9991048	13132	-6.796	1.077e-11	---
s__GGB1611_SGB2208_HB	rs148205919	6:32422687	G	T	0.05901	-0.4042	9.526e-09	intergenic	LOC101929163(dist=14958),HLA-DRA(dist=17155)	0.06232	-0.477	2.41e-05	nan	#NAME?	NA	s__GGB1611_SGB2208_HB_6:32422687	11375	-7.096	1.281e-12	--?
PWY-6353_LOGres	rs73100632	4:9987730	C	G	0.3721	-0.0642	9.59e-09	intronic	SLC2A9	0.372933	-0.0601156	0.0311658	0.4001	-0.0834	0.000363	PWY-6353_LOGres_4:9987730	12761	-6.922	4.449e-12	---
GLYOXYLATE-BYPASS_HB	rs9595603	13:47097516	A	G	0.4769	-0.1811	9.654e-09	intergenic	HTR2A(dist=200440),LINC00562(dist=832637)	0.4879	-0.04324	0.4124	0.4687	0.06118	0.3591	GLYOXYLATE-BYPASS_HB_13:47097516	12957	-4.582	4.601e-06	--+
g__Candidatus_Nanosyncoccus_HB	rs13114090	4:9958275	T	G	0.371	-0.1853	9.686e-09	intronic	SLC2A9	0.3678	-0.0806	0.1391	0.3887	-0.1598	0.0177	g__Candidatus_Nanosyncoccus_HB_4:9958275	13311	-6.149	7.789e-10	---
s__Solobacterium_SGB6829_HB	rs341052	11:72633497	C	G	0.2568	-0.2079	9.686e-09	intronic	PDE2A	0.2547	-0.06204	0.3059	0.2633	-0.03844	0.5984	s__Solobacterium_SGB6829_HB_11:72633497	13310	-5.228	1.713e-07	---
GLYOXYLATE-BYPASS_HB	chr13:47054668	13:47054668	G	GA	0.4807	-0.1816	9.783e-09	intergenic	HTR2A(dist=157592),LINC00562(dist=875485)	0.4875	-0.03715	0.4815	NA	NA	NA	GLYOXYLATE-BYPASS_HB_13:47054668	11126	-5.256	1.471e-07	--?
s__Haemophilus_parahaemolyticus_HB	rs34289603	18:54385338	A	ATGT	0.2797	-0.1998	9.803e-09	intergenic	C18orf54(dist=3303),DYNAP(dist=202421)	0.285	-0.2578	6.4e-06	0.2815	-0.07223	0.3118	s__Haemophilus_parahaemolyticus_HB_18:54385338	13308	-7.081	1.429e-12	---
s__GGB1611_SGB2208_HB	rs116025413	6:32424023	A	C	0.06003	-0.4021	9.86e-09	intergenic	LOC101929163(dist=16294),HLA-DRA(dist=15819)	0.06232	-0.477	2.41e-05	0.06031	-0.2344	0.09023	s__GGB1611_SGB2208_HB_6:32424023	13311	-7.202	5.946e-13	---
s__Cardiobacterium_hominis_HB	rs11583147	1:223644291	C	A	0.1176	0.2781	9.869e-09	intronic	CAPN8	0.1169	-0.0371	0.6471	0.1124	-0.09824	0.3287	s__Cardiobacterium_hominis_HB_1:223644291	13311	3.943	8.039e-05	+--
g__GGB1186_HB	rs11630233	15:86294477	A	T	0.06902	0.3717	9.877e-09	intronic	AGBL1	0.07101	0.1562	0.1822	0.064618	0.173878	0.267738	g__GGB1186_HB_15:86294477	13117	5.615	1.97e-08	+++
s__GGB1611_SGB2208_HB	rs115291739	6:32441509	T	G	0.05981	-0.403	9.879e-09	intronic	HLA-DRA	0.06264	-0.4762	2.401e-05	0.06031	-0.2513	0.0699	s__GGB1611_SGB2208_HB_6:32441509	13311	-7.247	4.261e-13	---
s__GGB1611_SGB2208_HB	rs115622881	6:32434131	A	G	0.05994	-0.4027	9.895e-09	intergenic	LOC101929163(dist=26402),HLA-DRA(dist=5711)	0.06232	-0.492	1.382e-05	0.06031	-0.2557	0.06537	s__GGB1611_SGB2208_HB_6:32434131	13311	-7.317	2.535e-13	---
s__GGB1611_SGB2208_HB	rs115661515	6:32427651	T	C	0.06011	-0.4021	9.951e-09	intergenic	LOC101929163(dist=19922),HLA-DRA(dist=12191)	0.06248	-0.4717	2.895e-05	0.06057	-0.2446	0.07735	s__GGB1611_SGB2208_HB_6:32427651	13311	-7.208	5.674e-13	---
s__GGB12441_SGB19290_HB	rs73414702	6:43732968	T	C	0.05607	0.4008	9.987e-09	intergenic	MRPS18A(dist=45156),VEGFA(dist=37241)	0.05986	0.257	0.0218	0.05335	0.4064	0.006185	s__GGB12441_SGB19290_HB_6:43732968	13311	6.674	2.481e-11	+++
s__Stomatobaculum_SGB5266_HB	rs7518202	1:103812804	T	A	0.3941	0.1829	1.003e-08	intergenic	AMY1C(dist=54112),LOC100129138(dist=260219)	0.4005	0.09552	0.06825	0.3858	0.08344	0.208	s__Stomatobaculum_SGB5266_HB_1:103812804	13271	5.886	3.964e-09	+++
g__Lachnoanaerobaculum_LOGres	rs4608811	4:10048051	A	C	0.4587	-0.0634	1.004e-08	intergenic	SLC2A9(dist=7803),WDR1(dist=26288)	0.454739	-0.177877	0.00797324	0.4835	-0.08556	0.000169	g__Lachnoanaerobaculum_LOGres_4:10048051	13131	-7.235	4.65e-13	---
s__Capnocytophaga_gingivalis_LOGres	rs55885831	12:11275357	T	TTTTGTTTACA	0.3676	0.06328	1.009e-08	intergenic	PRB3(dist=5650),PRB4(dist=31724)	0.359134	0.109394	0.123257	0.3523	0.002025	0.9292	s__Capnocytophaga_gingivalis_LOGres_12:11275357	13161	5.293	1.2e-07	+++
g__Lachnoanaerobaculum_LOGres	rs6826764	4:10029170	G	C	0.4591	-0.06338	1.011e-08	intronic	SLC2A9	0.455067	-0.1711	0.0109135	0.4861	-0.08726	0.0001249	g__Lachnoanaerobaculum_LOGres_4:10029170	13133	-7.211	5.553e-13	---
s__GGB1611_SGB2208_HB	rs114248983	6:32426666	T	C	0.06007	-0.4019	1.014e-08	intergenic	LOC101929163(dist=18937),HLA-DRA(dist=13176)	0.06232	-0.4575	4.924e-05	0.06037	-0.253	0.06822	s__GGB1611_SGB2208_HB_6:32426666	13309	-7.169	7.553e-13	---
g__Lachnoanaerobaculum_LOGres	rs7349721	4:10040938	A	T	0.4579	-0.06337	1.015e-08	upstream	SLC2A9(dist=690)	0.453099	-0.17468	0.00940839	0.4835	-0.08429	0.0002112	g__Lachnoanaerobaculum_LOGres_4:10040938	13133	-7.185	6.718e-13	---
g__Lachnoanaerobaculum_LOGres	rs11943372	4:9997722	T	A	0.4088	-0.06345	1.016e-08	intronic	SLC2A9	0.398655	-0.141634	0.0355509	0.4232	-0.08952	8.323e-05	g__Lachnoanaerobaculum_LOGres_4:9997722	13111	-7.034	2.004e-12	---
s__Lachnoanaerobaculum_umeaense_HB	rs75399540	5:26910673	A	C	0.4937	-0.2138	1.017e-08	intronic	CDH9	0.4805	0.05813	0.3593	0.5008	0.06716	0.3111	s__Lachnoanaerobaculum_umeaense_HB_5:26910673	13308	-3.706	0.0002108	-++
s__GGB1611_SGB2208_HB	rs6930615	6:32424428	A	G	0.05982	-0.4021	1.033e-08	intergenic	LOC101929163(dist=16699),HLA-DRA(dist=15414)	0.06232	-0.477	2.41e-05	0.05979	-0.2375	0.08864	s__GGB1611_SGB2208_HB_6:32424428	13310	-7.199	6.08e-13	---
s__Haemophilus_parahaemolyticus_HB	rs7236394	18:54395145	G	A	0.2798	-0.2	1.033e-08	intergenic	C18orf54(dist=13110),DYNAP(dist=192614)	0.2858	-0.2592	5.758e-06	0.2799	-0.06457	0.3673	s__Haemophilus_parahaemolyticus_HB_18:54395145	13311	-7.043	1.886e-12	---
g__GGB1186_HB	rs12904524	15:86289518	A	G	0.104	0.3125	1.034e-08	intronic	AGBL1	0.1071	0.02132	0.8301	0.09051	0.08812	0.5108	g__GGB1186_HB_15:86289518	13309	4.882	1.051e-06	+++
s__GGB1611_SGB2208_HB	rs115211911	6:32421837	T	C	0.06235	-0.3937	1.039e-08	intergenic	LOC101929163(dist=14108),HLA-DRA(dist=18005)	0.06674	-0.4244	0.0001024	0.06521	-0.2388	0.07618	s__GGB1611_SGB2208_HB_6:32421837	13311	-7.063	1.63e-12	---
s__GGB1611_SGB2208_HB	rs116227556	6:32421841	G	A	0.06235	-0.3937	1.039e-08	intergenic	LOC101929163(dist=14112),HLA-DRA(dist=18001)	0.06674	-0.4244	0.0001024	0.06521	-0.2388	0.07618	s__GGB1611_SGB2208_HB_6:32421841	13311	-7.063	1.63e-12	---
s__Haemophilus_parahaemolyticus_HB	rs7243152	18:54364593	G	T	0.2796	-0.1998	1.044e-08	intronic	C18orf54	0.2855	-0.2621	4.463e-06	0.2803	-0.07506	0.2954	s__Haemophilus_parahaemolyticus_HB_18:54364593	13310	-7.122	1.062e-12	---
s__GGB1611_SGB2208_HB	rs115573784	6:32426502	C	T	0.05891	-0.4048	1.049e-08	intergenic	LOC101929163(dist=18773),HLA-DRA(dist=13340)	0.0615	-0.4635	4.371e-05	0.05805	-0.2533	0.0725	s__GGB1611_SGB2208_HB_6:32426502	13309	-7.167	7.653e-13	---
s__Lachnoanaerobaculum_umeaense_HB rs80021617 5:26893430 G A 0.4982 0.2135 0.03731 1.055e-08 8327 intronic CDH9 s__Lachnoanaerobaculum_umeaense_HB_5:26893430 G A 0.5108 -0.06197 0.06359 0.3298 3048 s__Lachnoanaerobaculum_umeaense_HB_5:26893430 G A 0.4894 -0.09605 0.06641 0.1481 1934	s__Lachnoanaerobaculum_umeaense_HB_5:26893430	g	a	0.5002	0.0067	0.4892	13309	0.0004514	+--	8.001e-06
s__Solobacterium_SGB6829_HB	rs932075	11:72654211	T	C	0.2568	-0.2061	1.059e-08	intronic	PDE2A	0.2581	-0.07468	0.2146	0.2635	-0.05483	0.4544	s__Solobacterium_SGB6829_HB_11:72654211	13310	-5.404	6.502e-08	---
s__Lachnoanaerobaculum_umeaense_HB	rs2329348	5:26909121	C	A	0.4961	-0.2129	1.061e-08	intronic	CDH9	0.4806	0.05695	0.3693	0.5008	0.06582	0.3197	s__Lachnoanaerobaculum_umeaense_HB_5:26909121	13302	-3.716	0.0002022	-++
g__GGB1186_HB	chr15:86286418	15:86286418	C	CTAAT	0.06761	0.375	1.075e-08	intronic	AGBL1	0.07068	0.1481	0.2074	0.06237	0.08235	0.5981	g__GGB1186_HB_15:86286418	13309	5.327	9.965e-08	+++
g__Candidatus_Nanosyncoccus_HB	rs35817865	4:9974624	G	A	0.4334	-0.1784	1.077e-08	intronic	SLC2A9	0.4381	-0.05093	0.3408	0.4685	-0.1577	0.01539	g__Candidatus_Nanosyncoccus_HB_4:9974624	13290	-5.902	3.594e-09	---
s__Lachnoanaerobaculum_sp_ICM7_HB	rs6836961	4:10063200	A	C	0.3752	-0.1835	1.079e-08	intergenic	SLC2A9(dist=22952),WDR1(dist=11139)	0.367	-0.2239	3.096e-05	0.3997	-0.2646	0.000104	s__Lachnoanaerobaculum_sp_ICM7_HB_4:10063200	13310	-7.996	1.285e-15	---
GLYCOGENSYNTH-PWY_LOGres	rs3775579	4:184452152	G	C	0.3855	-0.06355	1.08e-08	intronic	IRF2	0.376151	-0.000926866	0.934107	0.3808	-0.02696	0.2485	GLYCOGENSYNTH-PWY_LOGres_4:184452152	12955	-4.99	6.037e-07	---
s__Haemophilus_parahaemolyticus_HB	rs12455692	18:54438063	C	G	0.2662	-0.2025	1.09e-08	intergenic	C18orf54(dist=56028),DYNAP(dist=149696)	0.2739	-0.2576	7.998e-06	0.2682	-0.03859	0.5933	s__Haemophilus_parahaemolyticus_HB_18:54438063	13309	-6.862	6.784e-12	---
s__GGB1611_SGB2208_HB	rs6911791	6:32428511	T	C	0.06003	-0.4013	1.097e-08	intergenic	LOC101929163(dist=20782),HLA-DRA(dist=11331)	0.06215	-0.4903	1.559e-05	0.06057	-0.2446	0.07735	s__GGB1611_SGB2208_HB_6:32428511	13310	-7.261	3.832e-13	---
s__GGB1611_SGB2208_HB	rs116705089	6:32428137	G	T	0.06003	-0.401	1.098e-08	intergenic	LOC101929163(dist=20408),HLA-DRA(dist=11705)	0.06199	-0.4857	1.89e-05	0.06031	-0.234	0.09117	s__GGB1611_SGB2208_HB_6:32428137	13311	-7.211	5.536e-13	---
s__Haemophilus_sputorum_HB	rs376524	19:48613181	G	A	0.4404	0.1867	1.105e-08	exonic	FAM83E	0.4385	0.1095	0.03934	0.4358	0.1508	0.02009	s__Haemophilus_sputorum_HB_19:48613181	13305	6.392	1.641e-10	+++
s__GGB1611_SGB2208_HB	rs148695343	6:32427480	TA	T	0.06011	-0.4008	1.109e-08	intergenic	LOC101929163(dist=19751),HLA-DRA(dist=12362)	0.06248	-0.4717	2.895e-05	0.06057	-0.2446	0.07735	s__GGB1611_SGB2208_HB_6:32427480	13311	-7.194	6.313e-13	---
s__Streptococcus_infantis_LOGres	rs1896550	12:11216119	T	G	0.3285	-0.0628	1.112e-08	intergenic	TAS2R42(dist=29182),PRB3(dist=49795)	0.323057	-0.113544	0.0649419	0.318	-0.03287	0.1486	s__Streptococcus_infantis_LOGres_12:11216119	13242	-5.949	2.692e-09	---
GLYOXYLATE-BYPASS_HB	rs1583206	13:47060419	A	G	0.4774	-0.1792	1.117e-08	intergenic	HTR2A(dist=163343),LINC00562(dist=869734)	0.4902	-0.04195	0.4267	0.4738	-0.01239	0.8529	GLYOXYLATE-BYPASS_HB_13:47060419	12942	-4.965	6.881e-07	---
s__Streptococcus_infantis_LOGres	rs7978976	12:11254898	G	A	0.3512	-0.0628	1.117e-08	intergenic	TAS2R42(dist=67961),PRB3(dist=11016)	0.347491	-0.121518	0.0455531	0.3314	-0.03967	0.08129	s__Streptococcus_infantis_LOGres_12:11254898	13240	-6.137	8.422e-10	---
s__Lachnoanaerobaculum_sp_ICM7_HB	rs7678211	4:10055959	T	G	0.4523	-0.1782	1.118e-08	intergenic	SLC2A9(dist=15711),WDR1(dist=18380)	0.4485	-0.203	0.0001264	0.4786	-0.2955	9.256e-06	s__Lachnoanaerobaculum_sp_ICM7_HB_4:10055959	13309	-8.043	8.801e-16	---
g__Stomatobaculum_LOGres	rs148943801	1:103444949	A	C	0.4336	0.06377	1.119e-08	intronic	LOC101928436	0.429977	0.154792	0.0852929	0.418	-0.009959	0.6676	g__Stomatobaculum_LOGres_1:103444949	12919	5.17	2.344e-07	++-
s__Lachnoanaerobaculum_sp_ICM7_HB	rs11727418	4:10059360	T	C	0.3723	-0.1836	1.119e-08	intergenic	SLC2A9(dist=19112),WDR1(dist=14979)	0.3641	-0.2097	9.676e-05	0.3969	-0.273	6.143e-05	s__Lachnoanaerobaculum_sp_ICM7_HB_4:10059360	13310	-7.911	2.551e-15	---
g__GGB1186_HB	chr15:86286413	15:86286413	C	CTT	0.0676	0.3746	1.12e-08	intronic	AGBL1	0.07051	0.1508	0.1993	0.06237	0.08235	0.5981	g__GGB1186_HB_15:86286413	13310	5.333	9.67e-08	+++
GLYOXYLATE-BYPASS_HB	rs2802395	13:47090741	C	A	0.4877	-0.1813	1.12e-08	intergenic	HTR2A(dist=193665),LINC00562(dist=839412)	0.4969	-0.04183	0.4292	0.4781	0.02152	0.7466	GLYOXYLATE-BYPASS_HB_13:47090741	12961	-4.772	1.823e-06	--+
s__GGB1611_SGB2208_HB	rs16822614	6:32442176	G	A	0.05994	-0.4009	1.125e-08	intronic	HLA-DRA	0.06264	-0.4762	2.401e-05	0.06034	-0.2163	0.1165	s__GGB1611_SGB2208_HB_6:32442176	13310	-7.137	9.536e-13	---
s__Streptococcus_infantis_LOGres	rs10772431	12:11260503	G	A	0.366	-0.06278	1.126e-08	intergenic	TAS2R42(dist=73566),PRB3(dist=5411)	0.35733	-0.126351	0.0372355	0.3454	-0.0443	0.05148	s__Streptococcus_infantis_LOGres_12:11260503	13242	-6.254	4.005e-10	---
s__Cardiobacterium_hominis_HB	rs11585533	1:223654211	A	C	0.1296	0.2651	1.128e-08	intronic	CAPN8	0.1269	-0.03487	0.6553	0.1245	-0.1331	0.17	s__Cardiobacterium_hominis_HB_1:223654211	13310	3.78	0.0001567	+--
s__Cardiobacterium_hominis_HB	rs1419306	1:223647019	G	C	0.1182	0.2751	1.129e-08	intronic	CAPN8	0.1169	-0.0371	0.6471	0.1129	-0.09921	0.3222	s__Cardiobacterium_hominis_HB_1:223647019	13308	3.92	8.85e-05	+--
PWY-7204_HB	rs12966028	18:54416858	G	A	0.2719	-0.2216	1.13e-08	intergenic	C18orf54(dist=34823),DYNAP(dist=170901)	0.2781	-0.321	4.787e-06	0.2713	-0.1095	0.1599	PWY-7204_HB_18:54416858	12960	-7.254	4.043e-13	---
s__Lachnoanaerobaculum_umeaense_HB	rs61664728	5:26916428	T	C	0.4929	-0.2131	1.133e-08	intronic	CDH9	0.48	0.05699	0.369	0.4995	0.07409	0.2635	s__Lachnoanaerobaculum_umeaense_HB_5:26916428	13308	-3.66	0.000252	-++
g__Candidatus_Nanosyncoccus_HB	rs10516195	4:10000209	T	G	0.3639	-0.1853	1.134e-08	intronic	SLC2A9	0.3654	-0.08742	0.1067	0.3905	-0.2105	0.001803	g__Candidatus_Nanosyncoccus_HB_4:10000209	13311	-6.478	9.315e-11	---
SALVADEHYPOX-PWY_LOGres	rs73100632	4:9987730	C	G	0.3721	-0.06388	1.134e-08	intronic	SLC2A9	0.372933	-0.0621939	0.0342882	0.4001	-0.08254	0.0004179	SALVADEHYPOX-PWY_LOGres_4:9987730	12761	-6.867	6.55e-12	---
GLYCOGENSYNTH-PWY_LOGres	rs9685945	4:184447659	G	A	0.3877	-0.06345	1.136e-08	intronic	IRF2	0.379809	-0.00159204	0.886414	0.3834	-0.03057	0.1905	GLYCOGENSYNTH-PWY_LOGres_4:184447659	12957	-5.07	3.968e-07	---
s__GGB1611_SGB2208_HB	rs556075062	6:32408159	A	AT	0.06011	-0.4013	1.144e-08	downstream	LOC101929163(dist=430)	0.06117	-0.4652	4.454e-05	0.06134	-0.1785	0.1934	s__GGB1611_SGB2208_HB_6:32408159	13311	-6.964	3.296e-12	---
s__Lachnoanaerobaculum_umeaense_HB	rs3811913	5:26880588	G	A	0.4816	0.2102	1.145e-08	downstream	CDH9(dist=12)	0.5013	-0.04602	0.4697	0.4747	-0.08993	0.173	s__Lachnoanaerobaculum_umeaense_HB_5:26880588	13298	3.649	0.0002628	+--
PWY-6353_LOGres	rs35933067	4:9998884	G	A	0.3755	-0.06384	1.152e-08	intronic	SLC2A9	0.373777	-0.0608019	0.0293162	0.4025	-0.07925	0.0007023	PWY-6353_LOGres_4:9998884	12765	-6.842	7.786e-12	---
s__Streptococcus_infantis_LOGres	rs1988869	12:11223229	T	C	0.3254	-0.06278	1.155e-08	intergenic	TAS2R42(dist=36292),PRB3(dist=42685)	0.323385	-0.111351	0.0703584	0.3186	-0.03553	0.1183	s__Streptococcus_infantis_LOGres_12:11223229	13229	-5.971	2.355e-09	---
PWY-6353_LOGres	rs4364264	4:9980059	T	C	0.4328	-0.06383	1.157e-08	intronic	SLC2A9	0.435201	-0.0328251	0.236362	0.4653	-0.08367	0.0003472	PWY-6353_LOGres_4:9980059	12764	-6.434	1.246e-10	---
s__Lachnoanaerobaculum_umeaense_HB rs16896364 5:26904082 A G 0.4968 0.2119 0.03716 1.173e-08 8323 intronic CDH9 s__Lachnoanaerobaculum_umeaense_HB_5:26904082 A G 0.5126 -0.06726 0.06365 0.2906 3048 s__Lachnoanaerobaculum_umeaense_HB_5:26904082 A G 0.491 -0.08521 0.06655 0.2004 1928	s__Lachnoanaerobaculum_umeaense_HB_5:26904082	a	g	0.4996	0.0074	0.491	13299	0.0004337	+--	1.062e-05
s__Streptococcus_infantis_LOGres	rs4763639	12:11211421	T	C	0.3288	-0.0627	1.175e-08	intergenic	TAS2R42(dist=24484),PRB3(dist=54493)	0.323057	-0.100482	0.101911	0.3188	-0.0342	0.1328	s__Streptococcus_infantis_LOGres_12:11211421	13242	-5.864	4.529e-09	---
PWY-6630_LOGres	rs6811914	4:184454784	C	T	0.3791	-0.06339	1.181e-08	intronic	IRF2	0.373272	0.00320061	0.791113	0.3746	-0.01727	0.4596	PWY-6630_LOGres_4:184454784	12952	-4.654	3.259e-06	-+-
s__Cardiobacterium_hominis_HB	rs60841677	1:223649828	T	C	0.118	0.2766	1.183e-08	intronic	CAPN8	0.1159	-0.03758	0.6449	0.1119	-0.1003	0.3205	s__Cardiobacterium_hominis_HB_1:223649828	13310	3.911	9.18e-05	+--
s__Lachnoanaerobaculum_umeaense_HB	rs80227581	5:26872568	C	A	0.4871	0.2119	1.183e-08	intergenic	LINC02211(dist=1570288),CDH9(dist=8032)	0.5008	-0.03981	0.5318	0.4776	-0.1055	0.1109	s__Lachnoanaerobaculum_umeaense_HB_5:26872568	13310	3.604	0.0003139	+--
g__Lachnoanaerobaculum_LOGres	rs35933067	4:9998884	G	A	0.3755	-0.06308	1.185e-08	intronic	SLC2A9	0.373729	-0.118539	0.082424	0.4007	-0.08876	9.567e-05	g__Lachnoanaerobaculum_LOGres_4:9998884	13132	-6.825	8.798e-12	---
s__Lachnoanaerobaculum_sp_ICM7_HB	rs10004571	4:10061341	G	A	0.4522	-0.1778	1.189e-08	intergenic	SLC2A9(dist=21093),WDR1(dist=12998)	0.4483	-0.2068	9.319e-05	0.4786	-0.2905	1.332e-05	s__Lachnoanaerobaculum_sp_ICM7_HB_4:10061341	13309	-8.04	9.009e-16	---
s__Haemophilus_parahaemolyticus_HB	chr18:54380441	18:54380441	CA	C	0.2799	-0.1982	1.193e-08	UTR3	C18orf54(NM_001288980:c.*2195C>CA,NM_001288981:c.*2195C>CA,NM_173529:c.*2195C>CA,NM_001288982:c.*2195C>CA)	0.2852	-0.2589	5.766e-06	nan	#NAME?	NA	s__Haemophilus_parahaemolyticus_HB_18:54380441	11377	-7.225	5.012e-13	--?
SALVADEHYPOX-PWY_LOGres	rs4364264	4:9980059	T	C	0.4328	-0.06376	1.199e-08	intronic	SLC2A9	0.435201	-0.0331462	0.256278	0.4653	-0.08228	0.0004358	SALVADEHYPOX-PWY_LOGres_4:9980059	12764	-6.383	1.741e-10	---
s__Haemophilus_parahaemolyticus_HB	rs34467690	18:54385676	G	GTT	0.2797	-0.1986	1.203e-08	intergenic	C18orf54(dist=3641),DYNAP(dist=202083)	0.2852	-0.2594	5.617e-06	0.2794	-0.07442	0.3011	s__Haemophilus_parahaemolyticus_HB_18:54385676	13311	-7.075	1.492e-12	---
g__Candidatus_Nanosyncoccus_HB	rs3756231	4:10023920	G	A	0.3818	-0.1837	1.207e-08	intronic	SLC2A9	0.3744	-0.1289	0.01666	0.4029	-0.172	0.01083	g__Candidatus_Nanosyncoccus_HB_4:10023920	13308	-6.625	3.48e-11	---
s__Haemophilus_parahaemolyticus_HB	rs1581483	18:54511332	A	G	0.332	-0.1887	1.21e-08	intergenic	C18orf54(dist=129297),DYNAP(dist=76427)	0.3367	-0.3094	1.787e-08	0.3356	-0.1024	0.1389	s__Haemophilus_parahaemolyticus_HB_18:54511332	13308	-7.767	8.037e-15	---
PWY-6353_LOGres	rs10516195	4:10000209	T	G	0.3639	-0.06374	1.216e-08	intronic	SLC2A9	0.36517	-0.0605501	0.0308045	0.3914	-0.07548	0.001247	PWY-6353_LOGres_4:10000209	12766	-6.765	1.333e-11	---
s__Cardiobacterium_hominis_HB	rs61825223	1:223638379	G	A	0.1158	0.2801	1.216e-08	intronic	CAPN8	0.1166	-0.0232	0.7745	0.107697	-0.0513554	0.636193	s__Cardiobacterium_hominis_HB_1:223638379	13118	4.229	2.346e-05	+--
s__GGB1611_SGB2208_HB	rs114657744	6:32427849	G	A	0.05986	-0.4002	1.22e-08	intergenic	LOC101929163(dist=20120),HLA-DRA(dist=11993)	0.06232	-0.4828	2.019e-05	0.06057	-0.2446	0.07735	s__GGB1611_SGB2208_HB_6:32427849	13311	-7.22	5.216e-13	---
s__Haemophilus_parahaemolyticus_HB	rs9949916	18:54366754	G	T	0.2804	-0.1979	1.22e-08	intronic	C18orf54	0.2855	-0.2621	4.463e-06	0.2796	-0.06888	0.3367	s__Haemophilus_parahaemolyticus_HB_18:54366754	13309	-7.068	1.567e-12	---
s__Streptococcus_infantis_LOGres	rs11054183	12:11213561	A	G	0.3288	-0.06263	1.22e-08	intergenic	TAS2R42(dist=26624),PRB3(dist=52353)	0.321909	-0.108158	0.0785107	0.316695	-0.0487774	0.336568	s__Streptococcus_infantis_LOGres_12:11213561	13052	-5.734	9.836e-09	---
s__Actinomyces_sp_HMT897_HB	rs75927060	19:37900686	C	A	0.3696	0.1868	1.226e-08	intronic	WDR87	0.3739	-0.03801	0.488	0.380884	-0.0142014	0.895778	s__Actinomyces_sp_HMT897_HB_19:37900686	13112	4.156	3.242e-05	+--
g__Candidatus_Nanosyncoccus_HB	rs12511989	4:10050034	A	G	0.3777	-0.1837	1.229e-08	intergenic	SLC2A9(dist=9786),WDR1(dist=24305)	0.3706	-0.13	0.01565	0.3995	-0.1729	0.01037	g__Candidatus_Nanosyncoccus_HB_4:10050034	13310	-6.639	3.16e-11	---
s__Fusobacterium_nucleatum_LOGres	chr10:19514868	10:19514868	A	AG	0.07736	0.06243	1.231e-08	intronic	MALRD1	0.0795343	-0.131506	0.16229	0.08144	-0.03974	0.08091	s__Fusobacterium_nucleatum_LOGres_10:19514868	13288	3.169	0.001529	+--
s__Haemophilus_parahaemolyticus_HB	rs4939759	18:54369044	C	T	0.2801	-0.1977	1.235e-08	intronic	C18orf54	0.2853	-0.2606	5.044e-06	0.28	-0.07411	0.3015	s__Haemophilus_parahaemolyticus_HB_18:54369044	13309	-7.082	1.418e-12	---
s__GGB1611_SGB2208_HB	rs114279634	6:32424704	G	A	0.05964	-0.401	1.24e-08	intergenic	LOC101929163(dist=16975),HLA-DRA(dist=15138)	0.06232	-0.477	2.41e-05	0.06057	-0.2435	0.07722	s__GGB1611_SGB2208_HB_6:32424704	13311	-7.199	6.081e-13	---
g__Lachnoanaerobaculum_LOGres	chr4:10000107	4:10000107	C	CTCTT	0.3742	-0.06299	1.244e-08	intronic	SLC2A9	0.373237	-0.117374	0.085757	0.3999	-0.08776	0.0001145	g__Lachnoanaerobaculum_LOGres_4:10000107	13132	-6.793	1.101e-11	---
s__GGB12441_SGB19290_HB	rs17713864	6:43727728	G	A	0.05844	0.3918	1.244e-08	intergenic	MRPS18A(dist=39916),VEGFA(dist=42481)	0.06299	0.241	0.02702	0.05493	0.3701	0.01138	s__GGB12441_SGB19290_HB_6:43727728	13308	6.527	6.731e-11	+++
GLYOXYLATE-BYPASS_HB	rs4942609	13:47052447	G	A	0.4838	-0.1803	1.246e-08	intergenic	HTR2A(dist=155371),LINC00562(dist=877706)	0.4913	-0.04421	0.4035	0.4766	0.01517	0.8205	GLYOXYLATE-BYPASS_HB_13:47052447	12960	-4.816	1.466e-06	--+
g__Candidatus_Nanosyncoccus_HB	rs1014290	4:10000237	G	A	0.3915	-0.1821	1.259e-08	intronic	SLC2A9	0.3909	-0.1113	0.03715	0.4121	-0.2483	0.000204	g__Candidatus_Nanosyncoccus_HB_4:10000237	13311	-6.915	4.678e-12	---
s__Haemophilus_parahaemolyticus_HB	rs7240890	18:54367958	G	C	0.2814	-0.1967	1.266e-08	intronic	C18orf54	0.2853	-0.2606	5.044e-06	0.2808	-0.05852	0.4122	s__Haemophilus_parahaemolyticus_HB_18:54367958	13306	-6.998	2.602e-12	---
s__GGB45697_SGB2042_HB	rs11113866	12:108419684	A	C	0.3725	-0.189	1.271e-08	intergenic	CMKLR1(dist=80367),LINC01498(dist=39741)	0.3696	0.02451	0.6667	0.3759	0.04088	0.5602	s__GGB45697_SGB2042_HB_12:108419684	13290	-4.071	4.689e-05	-++
s__GGB1611_SGB2208_HB	rs201717056	6:32422036	CTATT	C	0.05973	-0.4004	1.275e-08	intergenic	LOC101929163(dist=14307),HLA-DRA(dist=17806)	0.06199	-0.4708	3.144e-05	nan	#NAME?	NA	s__GGB1611_SGB2208_HB_6:32422036	11377	-7.023	2.177e-12	--?
s__GGB6813_SGB9727_HB	rs112576317	22:33124177	A	C	0.184	-0.2309	1.278e-08	intergenic	LINC01640(dist=7883),LARGE1(dist=148684)	0.1858	-0.06589	0.3281	0.1957	-0.006479	0.937	s__GGB6813_SGB9727_HB_22:33124177	13305	-4.998	5.799e-07	---
g__GGB1186_HB	rs112569533	15:86291364	GCACACA	G	0.1039	0.3102	1.279e-08	intronic	AGBL1	0.1087	0.03952	0.6871	0.0910396	0.0730553	0.597834	g__GGB1186_HB_15:86291364	13118	4.919	8.694e-07	+++
PWY-6353_LOGres	rs3756231	4:10023920	G	A	0.3818	-0.06364	1.279e-08	intronic	SLC2A9	0.374452	-0.0532158	0.0554547	0.4073	-0.08807	0.0001665	PWY-6353_LOGres_4:10023920	12763	-6.843	7.741e-12	---
s__Streptococcus_infantis_LOGres	rs4763654	12:11253842	G	A	0.3508	-0.06253	1.288e-08	intergenic	TAS2R42(dist=66905),PRB3(dist=12072)	0.347327	-0.122933	0.0430633	0.3304	-0.03833	0.09204	s__Streptococcus_infantis_LOGres_12:11253842	13242	-6.107	1.018e-09	---
s__GGB1611_SGB2208_HB	rs117132480	6:32472186	T	C	0.05358	-0.4207	1.3e-08	intergenic	HLA-DRA(dist=27135),HLA-DRB5(dist=45191)	0.05362	-0.569	3.358e-06	0.0567	-0.3252	0.02288	s__GGB1611_SGB2208_HB_6:32472186	13311	-7.589	3.218e-14	---
s__Streptococcus_infantis_LOGres	rs838965	12:11209849	C	T	0.3288	-0.06251	1.303e-08	intergenic	TAS2R42(dist=22912),PRB3(dist=56065)	0.322401	-0.101459	0.0982299	0.3191	-0.0297	0.1918	s__Streptococcus_infantis_LOGres_12:11209849	13241	-5.783	7.357e-09	---
s__Lachnoanaerobaculum_umeaense_HB	rs80003905	5:26913556	C	T	0.494	-0.2116	1.32e-08	intronic	CDH9	0.4802	0.05625	0.3754	0.4995	0.07054	0.2881	s__Lachnoanaerobaculum_umeaense_HB_5:26913556	13307	-3.667	0.0002459	-++
PWY-7204_HB	rs9646557	18:54435796	A	G	0.2729	-0.2204	1.324e-08	intergenic	C18orf54(dist=53761),DYNAP(dist=151963)	0.2773	-0.3125	8.393e-06	0.272	-0.1003	0.1978	PWY-7204_HB_18:54435796	12960	-7.131	9.957e-13	---
SALVADEHYPOX-PWY_LOGres	rs3756231	4:10023920	G	A	0.3818	-0.06356	1.332e-08	intronic	SLC2A9	0.374452	-0.0548652	0.0608244	0.4073	-0.08703	0.0001988	SALVADEHYPOX-PWY_LOGres_4:10023920	12763	-6.801	1.036e-11	---
PWY-6353_LOGres	rs71603977	4:9947762	C	T	0.3765	-0.06356	1.333e-08	intronic	SLC2A9	0.37057	-0.0393433	0.162939	0.3971	-0.07854	0.0007849	PWY-6353_LOGres_4:9947762	12765	-6.433	1.247e-10	---
s__Fusobacterium_nucleatum_LOGres	rs7923712	10:19516215	A	C	0.07745	0.06227	1.337e-08	intronic	MALRD1	0.0801902	-0.13867	0.139377	0.08273	-0.03689	0.1052	s__Fusobacterium_nucleatum_LOGres_10:19516215	13288	3.167	0.00154	+--
SALVADEHYPOX-PWY_LOGres	rs16891489	4:9965690	G	T	0.4312	-0.06355	1.338e-08	intronic	SLC2A9	0.430645	-0.0178756	0.542458	0.4638	-0.07504	0.001337	SALVADEHYPOX-PWY_LOGres_4:9965690	12765	-5.997	2.005e-09	---
s__Solobacterium_SGB6829_HB	rs907856	11:72656146	A	G	0.2572	-0.2046	1.338e-08	intronic	PDE2A	0.2581	-0.07468	0.2146	0.2647	-0.04904	0.5029	s__Solobacterium_SGB6829_HB_11:72656146	13310	-5.343	9.147e-08	---
s__GGB45697_SGB2042_HB	rs2559871	12:108424037	A	G	0.378	-0.1895	1.343e-08	intergenic	CMKLR1(dist=84720),LINC01498(dist=35388)	0.3668	0.01569	0.7829	0.3761	0.01173	0.8679	s__GGB45697_SGB2042_HB_12:108424037	13308	-4.298	1.72e-05	-++
PWY-5345_LOGres	chr10:120815306	10:120815306	G	GT	0.4099	0.06332	1.35e-08	ncRNA_intronic	WDR11-AS1	0.412313	-0.00270742	0.913228	NA	NA	NA	PWY-5345_LOGres_10:120815306	11036	4.788	1.683e-06	+-?
s__Stomatobaculum_SGB5266_HB	rs1930179	1:103823102	T	A	0.397	0.1808	1.355e-08	intergenic	AMY1C(dist=64410),LOC100129138(dist=249921)	0.4037	0.0879	0.09269	0.3909	0.08613	0.194	s__Stomatobaculum_SGB5266_HB_1:103823102	13299	5.792	6.957e-09	+++
s__Streptococcus_infantis_LOGres	rs7309064	12:11258856	G	A	0.3495	-0.06243	1.363e-08	intergenic	TAS2R42(dist=71919),PRB3(dist=7058)	0.347655	-0.122607	0.043679	0.3309	-0.04077	0.07314	s__Streptococcus_infantis_LOGres_12:11258856	13239	-6.137	8.416e-10	---
s__Streptococcus_infantis_LOGres	rs2008542	12:11218334	T	C	0.329	-0.06243	1.364e-08	intergenic	TAS2R42(dist=31397),PRB3(dist=47580)	0.323549	-0.112722	0.0667951	0.3187	-0.03434	0.1313	s__Streptococcus_infantis_LOGres_12:11218334	13240	-5.94	2.842e-09	---
s__GGB1611_SGB2208_HB	rs6935319	6:32424793	T	C	0.05998	-0.3976	1.368e-08	intergenic	LOC101929163(dist=17064),HLA-DRA(dist=15049)	0.06232	-0.477	2.41e-05	0.06031	-0.2389	0.08593	s__GGB1611_SGB2208_HB_6:32424793	13311	-7.166	7.699e-13	---
s__Streptococcus_infantis_LOGres	chr12:11253891	12:11253891	TTA	T	0.3509	-0.06242	1.368e-08	intergenic	TAS2R42(dist=66954),PRB3(dist=12023)	0.347491	-0.122159	0.0444242	0.3309	-0.04123	0.06992	s__Streptococcus_infantis_LOGres_12:11253891	13242	-6.141	8.205e-10	---
PWY-6353_LOGres	rs16891489	4:9965690	G	T	0.4312	-0.06351	1.37e-08	intronic	SLC2A9	0.430645	-0.0181186	0.515517	0.4638	-0.07643	0.001085	PWY-6353_LOGres_4:9965690	12765	-6.037	1.574e-09	---
s__Haemophilus_parahaemolyticus_HB	rs4410171	18:54574352	C	G	0.2934	-0.1934	1.372e-08	intergenic	C18orf54(dist=192317),DYNAP(dist=13407)	0.2952	-0.228	6.613e-05	0.292599	-0.0821997	0.267679	s__Haemophilus_parahaemolyticus_HB_18:54574352	13117	-6.85	7.376e-12	---
g__Candidatus_Nanosyncoccus_HB	rs11727418	4:10059360	T	C	0.3723	-0.183	1.373e-08	intergenic	SLC2A9(dist=19112),WDR1(dist=14979)	0.3641	-0.1306	0.01598	0.3969	-0.1829	0.006485	g__Candidatus_Nanosyncoccus_HB_4:10059360	13310	-6.681	2.375e-11	---
s__Lachnoanaerobaculum_umeaense_HB rs2876821 5:26899054 G A 0.4975 0.2118 0.03732 1.377e-08 8328 intronic CDH9 s__Lachnoanaerobaculum_umeaense_HB_5:26899054 G A 0.5105 -0.06417 0.06359 0.3129 3048 s__Lachnoanaerobaculum_umeaense_HB_5:26899054 G A 0.4886 -0.08743 0.06644 0.1882 1932	s__Lachnoanaerobaculum_umeaense_HB_5:26899054	g	a	0.5008	0.0069	0.4895	13308	0.000455	+--	1.19e-05
SALVADEHYPOX-PWY_LOGres	rs10516195	4:10000209	T	G	0.3639	-0.06349	1.383e-08	intronic	SLC2A9	0.36517	-0.0631138	0.0325847	0.3914	-0.07458	0.001426	SALVADEHYPOX-PWY_LOGres_4:10000209	12766	-6.722	1.79e-11	---
g__Lachnoanaerobaculum_LOGres	rs34407859	4:10000028	T	C	0.3747	-0.06279	1.385e-08	intronic	SLC2A9	0.373893	-0.123519	0.0705698	0.4005	-0.08907	8.998e-05	g__Lachnoanaerobaculum_LOGres_4:10000028	13133	-6.844	7.694e-12	---
s__Streptococcus_infantis_LOGres	rs4763643	12:11222699	G	A	0.3265	-0.06242	1.388e-08	intergenic	TAS2R42(dist=35762),PRB3(dist=43215)	0.323221	-0.111826	0.0691377	0.3179	-0.03667	0.1074	s__Streptococcus_infantis_LOGres_12:11222699	13230	-5.969	2.385e-09	---
g__Stomatobaculum_LOGres	rs10881166	1:103489930	A	C	0.4063	0.06336	1.389e-08	intronic	LOC101928436	0.416366	0.0985952	0.278225	0.3966	-0.002195	0.9246	g__Stomatobaculum_LOGres_1:103489930	12921	4.958	7.114e-07	++-
s__Lachnoanaerobaculum_sp_ICM7_HB	rs10033088	4:10056088	G	A	0.452	-0.1771	1.397e-08	intergenic	SLC2A9(dist=15840),WDR1(dist=18251)	0.4483	-0.2017	0.000139	0.4789	-0.2862	1.681e-05	s__Lachnoanaerobaculum_sp_ICM7_HB_4:10056088	13310	-7.952	1.84e-15	---
g__Candidatus_Nanosyncoccus_HB	rs35482941	4:10043720	TG	T	0.3769	-0.1826	1.412e-08	intergenic	SLC2A9(dist=3472),WDR1(dist=30619)	0.3709	-0.1326	0.01375	0.3998	-0.1749	0.009547	g__Candidatus_Nanosyncoccus_HB_4:10043720	13306	-6.653	2.864e-11	---
s__Cardiobacterium_hominis_HB	rs12754440	1:223650972	A	G	0.1178	0.275	1.412e-08	intronic	CAPN8	0.1158	-0.04056	0.619	0.1115	-0.1005	0.3214	s__Cardiobacterium_hominis_HB_1:223650972	13309	3.871	0.0001084	+--
g__Lachnoanaerobaculum_LOGres	rs978465	4:10317500	G	A	0.3811	-0.06275	1.417e-08	intergenic	WDR1(dist=200466),ZNF518B(dist=122380)	0.374221	-0.0745155	0.27227	0.4085	-0.0778	0.0006278	g__Lachnoanaerobaculum_LOGres_4:10317500	13133	-6.308	2.819e-10	---
PWY-4041_LOGres	rs12478843	2:37080089	A	G	0.1604	0.06305	1.424e-08	intronic	HEATR5B	0.156219	0.00719322	0.785753	0.1589	-0.008199	0.7256	PWY-4041_LOGres_2:37080089	12940	4.479	7.515e-06	++-
s__Fusobacterium_nucleatum_LOGres	rs116161099	10:19492607	A	T	0.07589	0.06216	1.425e-08	intronic	MALRD1	0.0765825	-0.125366	0.189095	0.07887	-0.04972	0.02896	s__Fusobacterium_nucleatum_LOGres_10:19492607	13288	3.022	0.002507	+--
PWY-6353_LOGres	rs35922993	4:9924301	T	C	0.3824	-0.06343	1.428e-08	intronic	SLC2A9	0.378164	-0.0473213	0.0909784	0.4039	-0.07082	0.002469	PWY-6353_LOGres_4:9924301	12765	-6.441	1.186e-10	---
g__GGB1024_HB	rs12216619	7:140436984	A	G	0.149	0.2845	1.429e-08	intergenic	RAB19(dist=10734),MKRN1(dist=16056)	0.1456	-0.1079	0.2293	0.1482	-0.02799	0.8002	g__GGB1024_HB_7:140436984	13307	3.812	0.0001376	+--
s__GGB1611_SGB2208_HB	rs117625150	6:32407302	C	T	0.06041	-0.3973	1.431e-08	ncRNA_exonic	LOC101929163	0.06117	-0.4652	4.454e-05	0.06186	-0.16	0.24	s__GGB1611_SGB2208_HB_6:32407302	13311	-6.886	5.724e-12	---
s__GGB1611_SGB2208_HB	rs114196722	6:32440374	A	G	0.0593	-0.3992	1.439e-08	intronic	HLA-DRA	0.06264	-0.4762	2.401e-05	0.06031	-0.2347	0.089	s__GGB1611_SGB2208_HB_6:32440374	13311	-7.154	8.451e-13	---
PWY-7204_HB	rs35367184	18:54363585	G	A	0.2817	-0.2158	1.442e-08	intronic	C18orf54	0.2855	-0.3084	8.673e-06	0.2788	-0.1049	0.1755	PWY-7204_HB_18:54363585	12956	-7.141	9.236e-13	---
SALVADEHYPOX-PWY_LOGres	rs28730480	4:10047243	C	T	0.4043	-0.06342	1.443e-08	intergenic	SLC2A9(dist=6995),WDR1(dist=27096)	0.39487	-0.0267187	0.355505	0.4252	-0.08785	0.0001716	SALVADEHYPOX-PWY_LOGres_4:10047243	12762	-6.347	2.201e-10	---
g__GGB1186_HB	rs41525551	15:86291918	G	C	0.07155	0.3629	1.446e-08	intronic	AGBL1	0.07281	0.1728	0.1344	0.06601	0.1238	0.4161	g__GGB1186_HB_15:86291918	13310	5.51	3.594e-08	+++
GLYOXYLATE-BYPASS_HB	rs9562702	13:47064577	A	T	0.4804	-0.1796	1.448e-08	intergenic	HTR2A(dist=167501),LINC00562(dist=865576)	0.489	-0.04432	0.402	0.471	0.03328	0.6187	GLYOXYLATE-BYPASS_HB_13:47064577	12959	-4.695	2.663e-06	--+
s__Lachnoanaerobaculum_sp_ICM7_HB	rs11461301	4:10058061	C	CT	0.4532	-0.1768	1.448e-08	intergenic	SLC2A9(dist=17813),WDR1(dist=16278)	0.448	-0.2014	0.000143	0.4794	-0.2917	1.23e-05	s__Lachnoanaerobaculum_sp_ICM7_HB_4:10058061	13310	-7.97	1.591e-15	---
g__Lachnoanaerobaculum_LOGres	rs733175	4:10048517	C	T	0.4589	-0.06271	1.451e-08	intergenic	SLC2A9(dist=8269),WDR1(dist=25822)	0.454739	-0.177877	0.00797324	0.4837	-0.08821	0.000107	g__Lachnoanaerobaculum_LOGres_4:10048517	13127	-7.228	4.885e-13	---
PWY-6353_LOGres	rs28730480	4:10047243	C	T	0.4043	-0.06341	1.454e-08	intergenic	SLC2A9(dist=6995),WDR1(dist=27096)	0.39487	-0.026025	0.343171	0.4252	-0.08881	0.0001454	PWY-6353_LOGres_4:10047243	12762	-6.373	1.857e-10	---
PWY-7204_HB	rs11083054	18:54424001	G	T	0.2705	-0.2193	1.455e-08	intergenic	C18orf54(dist=41966),DYNAP(dist=163758)	0.2785	-0.2671	0.0001373	0.2716	-0.07997	0.2996	PWY-7204_HB_18:54424001	12957	-6.713	1.904e-11	---
s__Lachnoanaerobaculum_umeaense_HB	rs56994542	5:26886620	C	T	0.4854	0.2107	1.459e-08	intronic	CDH9	0.5008	-0.05243	0.4097	0.4768	-0.0869	0.1892	s__Lachnoanaerobaculum_umeaense_HB_5:26886620	13307	3.588	0.0003334	+--
s__Haemophilus_parahaemolyticus_HB	rs1523860	18:54433095	T	A	0.2819	-0.1966	1.461e-08	intergenic	C18orf54(dist=51060),DYNAP(dist=154664)	0.2885	-0.2488	1.259e-05	0.2829	-0.04895	0.494	s__Haemophilus_parahaemolyticus_HB_18:54433095	13310	-6.833	8.33e-12	---
s__Haemophilus_parahaemolyticus_HB	rs397710629	18:54415618	C	CGTT	0.2855	-0.1961	1.461e-08	intergenic	C18orf54(dist=33583),DYNAP(dist=172141)	0.2922	-0.2465	1.448e-05	0.2881	-0.06882	0.3299	s__Haemophilus_parahaemolyticus_HB_18:54415618	13311	-6.929	4.251e-12	---
GLYOXYLATE-BYPASS_HB	rs2503307	13:47064617	T	C	0.4802	-0.1795	1.463e-08	intergenic	HTR2A(dist=167541),LINC00562(dist=865536)	0.489	-0.04432	0.402	0.4712	0.03578	0.5921	GLYOXYLATE-BYPASS_HB_13:47064617	12961	-4.679	2.882e-06	--+
s__Streptococcus_infantis_LOGres	rs1542293	12:11230097	T	C	0.3308	-0.06228	1.471e-08	intergenic	TAS2R42(dist=43160),PRB3(dist=35817)	0.323385	-0.113078	0.0663112	0.3191	-0.03211	0.1582	s__Streptococcus_infantis_LOGres_12:11230097	13242	-5.894	3.76e-09	---
g__GGB1024_HB	rs11424844	7:140437593	CT	C	0.1505	0.2842	1.474e-08	intergenic	RAB19(dist=11343),MKRN1(dist=15447)	0.1459	-0.1121	0.2119	0.1503	-0.006891	0.95	g__GGB1024_HB_7:140437593	13310	3.859	0.0001137	+--
g__GGB1186_HB	rs10083694	15:86307053	A	C	0.06863	0.3701	1.475e-08	ncRNA_intronic	AGBL1-AS1	0.07133	0.1916	0.09857	0.06469	0.1317	0.3881	g__GGB1186_HB_15:86307053	13311	5.6	2.143e-08	+++
SALVADEHYPOX-PWY_LOGres	rs35933067	4:9998884	G	A	0.3755	-0.06336	1.48e-08	intronic	SLC2A9	0.373777	-0.0629826	0.0320992	0.4025	-0.0783	0.0008149	SALVADEHYPOX-PWY_LOGres_4:9998884	12765	-6.776	1.238e-11	---
s__Stomatobaculum_SGB5266_HB	rs10881479	1:103814778	C	A	0.3964	0.1812	1.482e-08	intergenic	AMY1C(dist=56086),LOC100129138(dist=258245)	0.3996	0.09588	0.06826	0.387995	0.0700856	0.306394	s__Stomatobaculum_SGB5266_HB_1:103814778	13118	5.764	8.2e-09	+++
s__GGB1611_SGB2208_HB	rs140938009	6:32426344	A	C	0.0596	-0.3989	1.492e-08	intergenic	LOC101929163(dist=18615),HLA-DRA(dist=13498)	0.06215	-0.4726	2.907e-05	0.0590935	-0.276477	0.0504052	s__GGB1611_SGB2208_HB_6:32426344	13120	-7.24	4.491e-13	---
p__Candidatus_Saccharibacteria_LOGres	rs143494694	3:140699028	TTACTTC	T	0.3842	-0.06221	1.493e-08	intronic	TRIM42	0.398655	-0.00505152	0.920738	0.3927	0.01002	0.6602	p__Candidatus_Saccharibacteria_LOGres_3:140699028	13248	-4.354	1.334e-05	--+
PWY-5154_LOGres	rs11155900	6:153183295	G	A	0.2219	-0.06295	1.494e-08	intergenic	RGS17(dist=52041),MIR7641-2(dist=237182)	0.219246	0.0432485	0.322953	0.2238	0.006124	0.7933	PWY-5154_LOGres_6:153183295	12934	-3.898	9.7e-05	-++
s__Rothia_mucilaginosa_LOGres	chr7:98305052	7:98305052	TTG	T	0.07061	-0.06228	1.502e-08	intronic	BAIAP2L1	0.122827	0.0907405	0.295865	NA	NA	NA	s__Rothia_mucilaginosa_LOGres_7:98305052	11297	-4.294	1.752e-05	-+?
PWY-5154_LOGres	rs12153830	6:153183384	T	C	0.2077	-0.06293	1.513e-08	intergenic	RGS17(dist=52130),MIR7641-2(dist=237093)	0.204861	0.0501823	0.262723	0.2113	0.009532	0.6834	PWY-5154_LOGres_6:153183384	12934	-3.778	0.0001583	-++
PWY-6353_LOGres	rs13145108	4:9958572	G	A	0.4321	-0.06331	1.517e-08	intronic	SLC2A9	0.433176	-0.0215125	0.441189	0.4633	-0.08018	0.0006046	PWY-6353_LOGres_4:9958572	12766	-6.142	8.152e-10	---
g__GGB1024_HB	rs2885920	7:140438592	A	G	0.1425	0.2878	1.523e-08	intergenic	RAB19(dist=12342),MKRN1(dist=14448)	0.1462	-0.1145	0.2022	0.148881	0.0166113	0.885095	g__GGB1024_HB_7:140438592	13096	3.944	8.015e-05	+-+
s__GGB45697_SGB2042_HB	rs11113876	12:108429045	G	A	0.3783	-0.1889	1.525e-08	intergenic	CMKLR1(dist=89728),LINC01498(dist=30380)	0.3698	0.02042	0.7195	0.376	0.0413	0.5568	s__GGB45697_SGB2042_HB_12:108429045	13310	-4.08	4.498e-05	-++
s__Haemophilus_parahaemolyticus_HB	rs12604509	18:54431165	A	G	0.2809	-0.1969	1.533e-08	intergenic	C18orf54(dist=49130),DYNAP(dist=156594)	0.287	-0.2523	9.906e-06	0.2822	-0.0528	0.4605	s__Haemophilus_parahaemolyticus_HB_18:54431165	13309	-6.872	6.333e-12	---
g__Candidatus_Nanosyncoccus_HB	rs2276962	4:10021256	C	T	0.38	-0.1825	1.549e-08	intronic	SLC2A9	0.3682	-0.1145	0.03573	0.4017	-0.1658	0.0136	g__Candidatus_Nanosyncoccus_HB_4:10021256	13309	-6.419	1.367e-10	---
s__Haemophilus_parahaemolyticus_HB	rs7236124	18:54395128	C	T	0.2798	-0.1976	1.549e-08	intergenic	C18orf54(dist=13093),DYNAP(dist=192631)	0.286	-0.2608	5.076e-06	0.2796	-0.06647	0.3544	s__Haemophilus_parahaemolyticus_HB_18:54395128	13311	-7.01	2.383e-12	---
GLYOXYLATE-BYPASS_HB	rs2183055	13:47051238	G	A	0.4859	-0.1789	1.552e-08	intergenic	HTR2A(dist=154162),LINC00562(dist=878915)	0.4911	-0.04287	0.4173	0.4763	0.01269	0.8495	GLYOXYLATE-BYPASS_HB_13:47051238	12961	-4.788	1.683e-06	--+
s__Solobacterium_SGB6829_HB	rs12797368	11:72658341	T	C	0.2555	-0.2035	1.556e-08	intronic	PDE2A	0.258	-0.06902	0.2514	0.2629	-0.05318	0.4685	s__Solobacterium_SGB6829_HB_11:72658341	13308	-5.298	1.169e-07	---
GLYOXYLATE-BYPASS_HB	rs766509	13:47055911	C	T	0.4831	-0.1787	1.559e-08	intergenic	HTR2A(dist=158835),LINC00562(dist=874242)	0.4921	-0.04355	0.41	0.4741	0.008903	0.8942	GLYOXYLATE-BYPASS_HB_13:47055911	12961	-4.815	1.471e-06	--+
SALVADEHYPOX-PWY_LOGres	rs13145108	4:9958572	G	A	0.4321	-0.06326	1.56e-08	intronic	SLC2A9	0.433176	-0.0214447	0.466048	0.4633	-0.07874	0.0007584	SALVADEHYPOX-PWY_LOGres_4:9958572	12766	-6.095	1.096e-09	---
g__GGB1186_HB	rs11855066	15:86294356	A	G	0.06919	0.3661	1.561e-08	intronic	AGBL1	0.07084	0.1593	0.174	0.06343	0.1114	0.4726	g__GGB1186_HB_15:86294356	13310	5.397	6.764e-08	+++
PWY-7204_HB	rs16958200	18:54392596	T	C	0.2683	-0.2205	1.561e-08	intergenic	C18orf54(dist=10561),DYNAP(dist=195163)	0.2734	-0.316	7.537e-06	0.2683	-0.1422	0.07002	PWY-7204_HB_18:54392596	12960	-7.317	2.535e-13	---
PWY-6353_LOGres	rs2276962	4:10021256	C	T	0.38	-0.06324	1.576e-08	intronic	SLC2A9	0.368377	-0.0443879	0.114879	0.4057	-0.07884	0.0007515	PWY-6353_LOGres_4:10021256	12764	-6.503	7.894e-11	---
s__Haemophilus_parahaemolyticus_HB	rs7229973	18:54574881	G	C	0.2923	-0.1937	1.579e-08	intergenic	C18orf54(dist=192846),DYNAP(dist=12878)	0.2952	-0.228	6.613e-05	0.292312	-0.0797534	0.282751	s__Haemophilus_parahaemolyticus_HB_18:54574881	13119	-6.819	9.199e-12	---
s__Cardiobacterium_hominis_HB	rs11577934	1:223652115	C	T	0.1176	0.2744	1.583e-08	intronic	CAPN8	0.1158	-0.04095	0.6156	0.1119	-0.0995	0.3221	s__Cardiobacterium_hominis_HB_1:223652115	13311	3.853	0.0001166	+--
[truncated: 706 more rows]

## Sheet: ST9
Supplementary Table 9. Genetic associations with microbial alpha (Shannon index, Simpson index) and beta diversity features ( PCoA1-10)
[truncated: 564 more rows]

[truncated: 11 more sheets: ST10, ST11, ST12, ST13, ST14, ST15, ST16, ST17, ST18, ST19, ST20]
